# Supplementary material for: Indigenous knowledge networks in the face of global change
Source: PubMed Central journal article supplement — Proc Natl Acad Sci U S A. 2019 May 1;116(20):9913–8. doi: 10.1073/pnas.1821843116 (PMC6525496; doi:10.1073/pnas.1821843116), 2019-05-01
Supplement: pnas.1821843116.sapp.pdf [file pnas.1821843116.sapp.pdf]

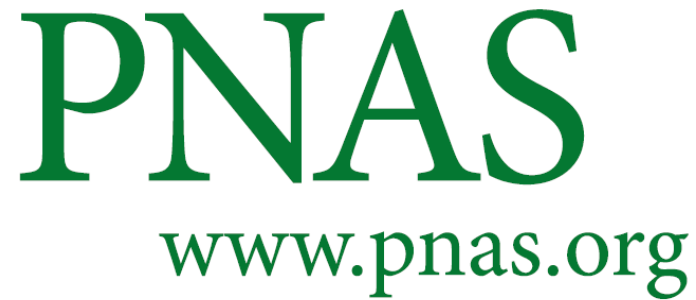

## Supplementary Information for

Indigenous knowledge networks in the face of global change

Rodrigo Cámara-Leret, Miguel A. Fortuna & Jordi Bascompte

Rodrigo Cámara-Leret  
Email: [R.CamaraLeret@kew.org](mailto:R.CamaraLeret@kew.org)

### **This PDF file includes:**

Supplementary text  
Figs. S1 to S5  
Tables S1 to S4

a

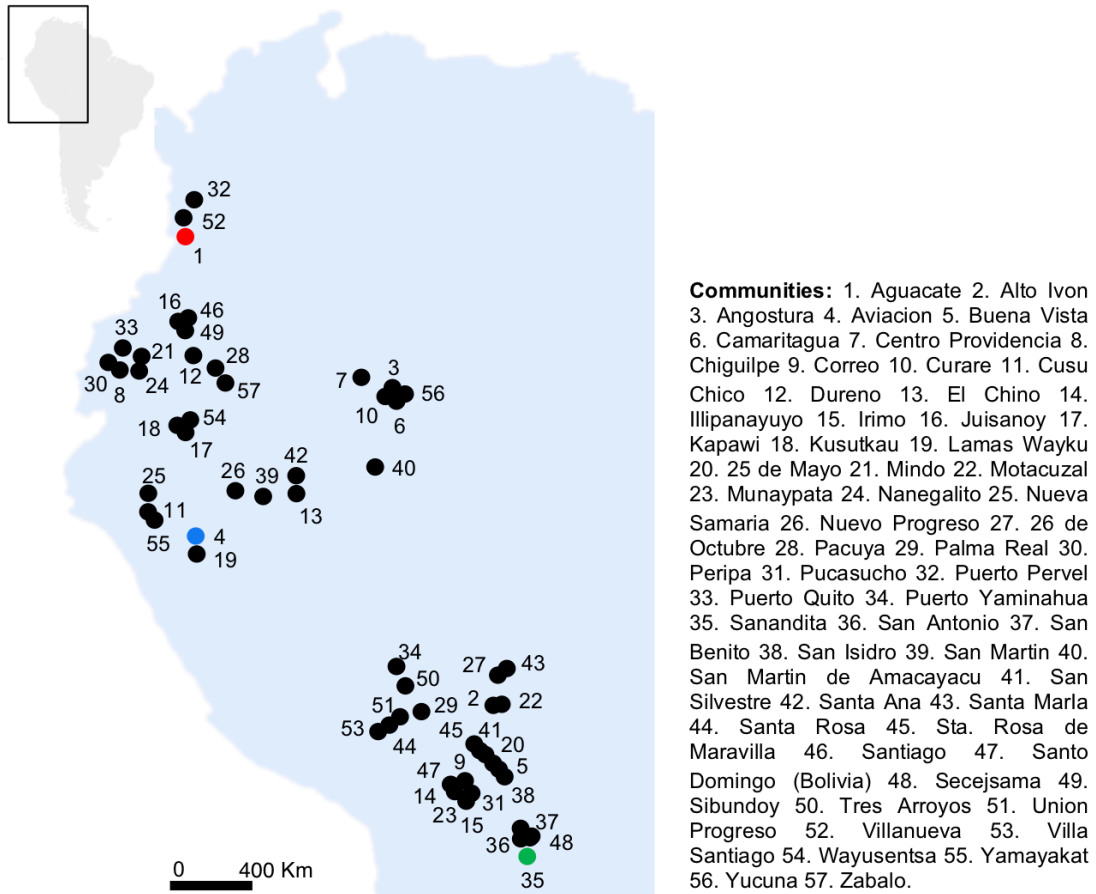

**Fig. S1.** Geographic distribution of the communities studied. Map of northwestern South America showing the geographic location and the names of the 57 communities.

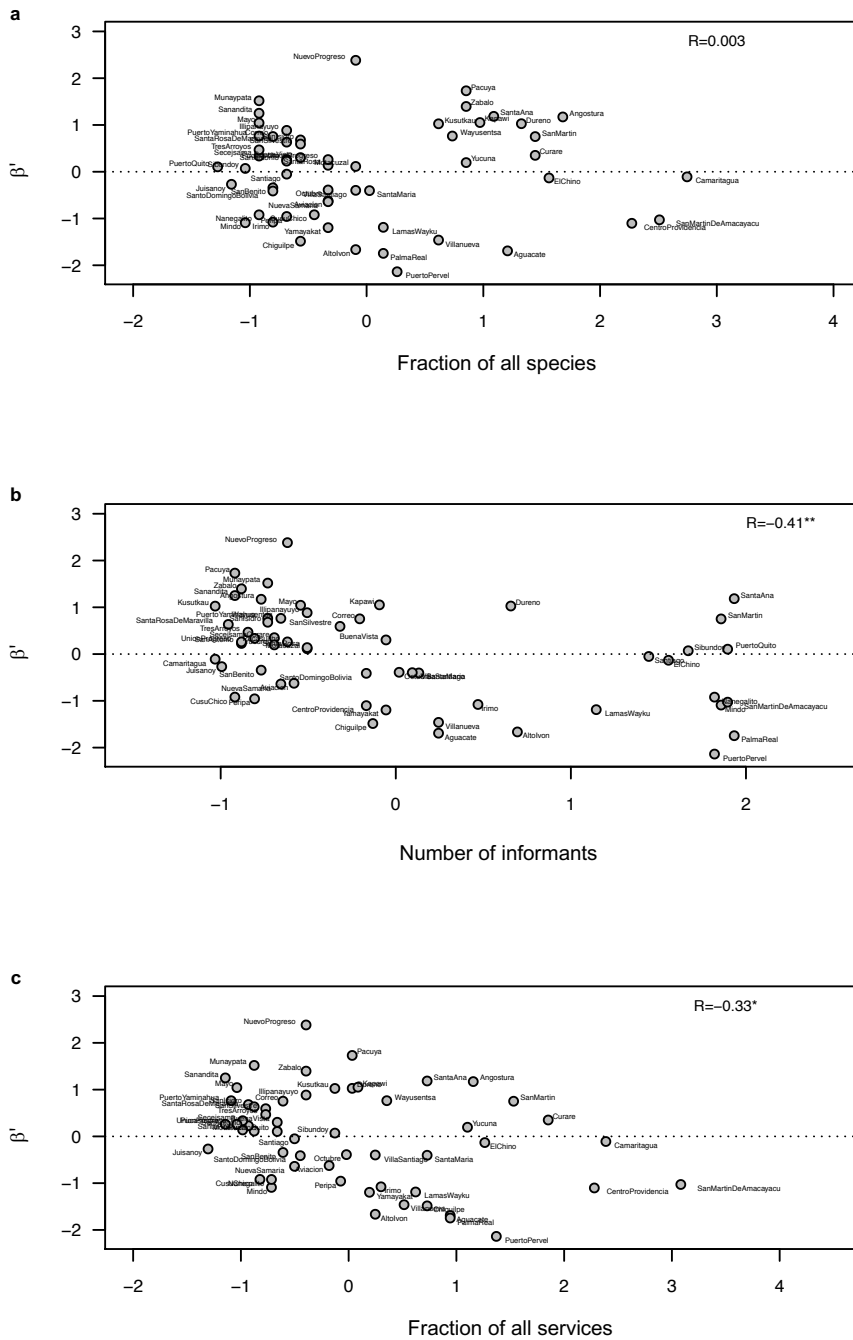

**Fig. S2.** How much a community differs from the metaweb ( $\beta'$ ) is unrelated to the (a) fraction of the regional species pool contained in the community, but is significantly related to the (b) number of informants in the community, and (c) fraction of all services contained in the community. All variables were standardized to a mean of 0 and standard deviation of 1. \* ( $P \leq 0.05$ ); \*\* ( $P \leq 0.01$ ).

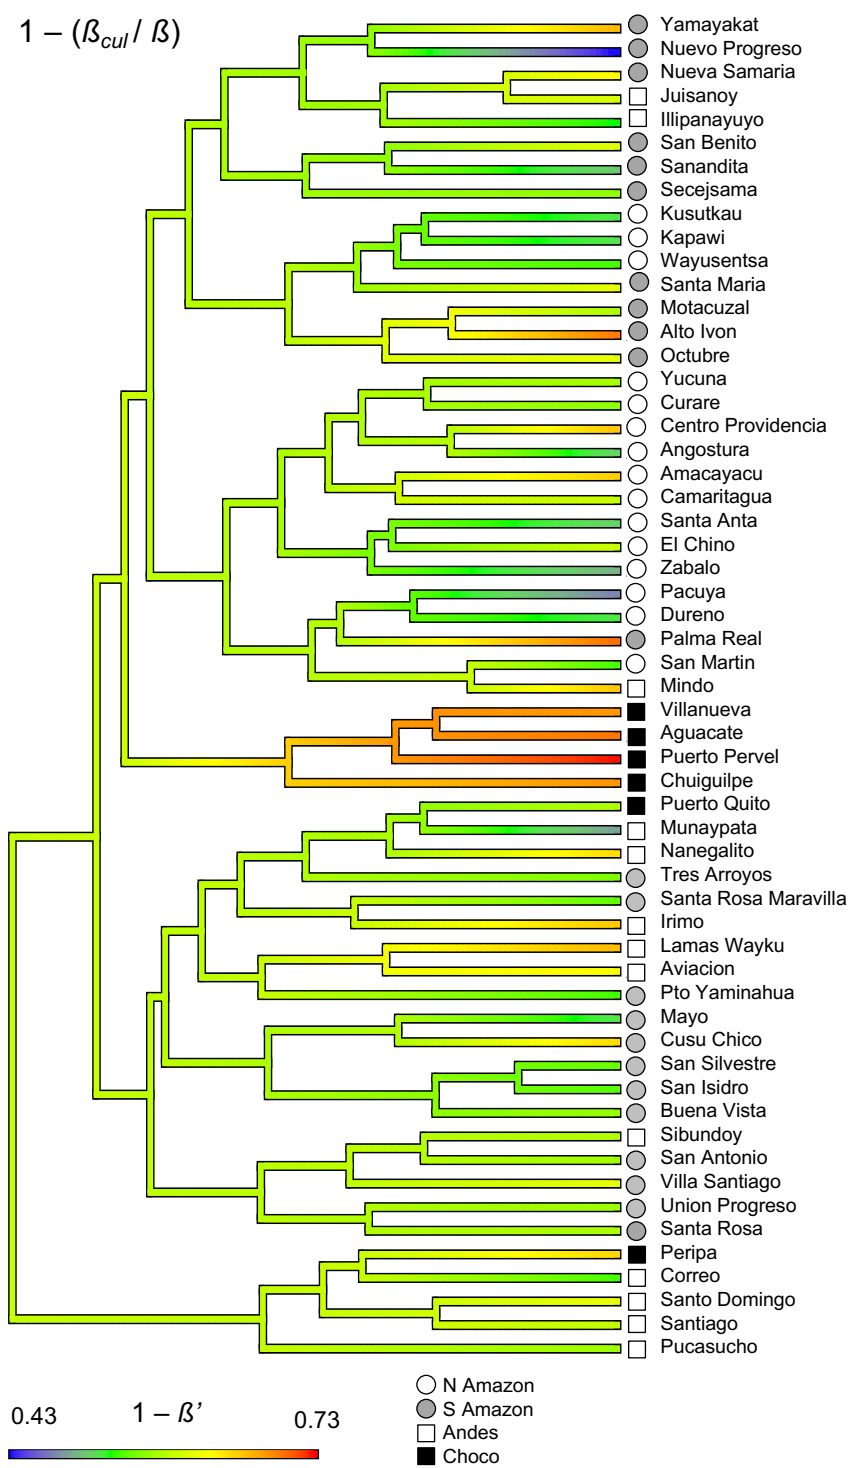

**Fig. S3.** Cluster classification showing the similarity between communities in their use of shared plants ( $1 - \beta_{cul}/\beta$ ). Branch colors depict how much a given community resembles the metaweb ( $1 - \beta'$ ). Names at branch tips are the 57 communities, and symbols show the geographic location of each community.

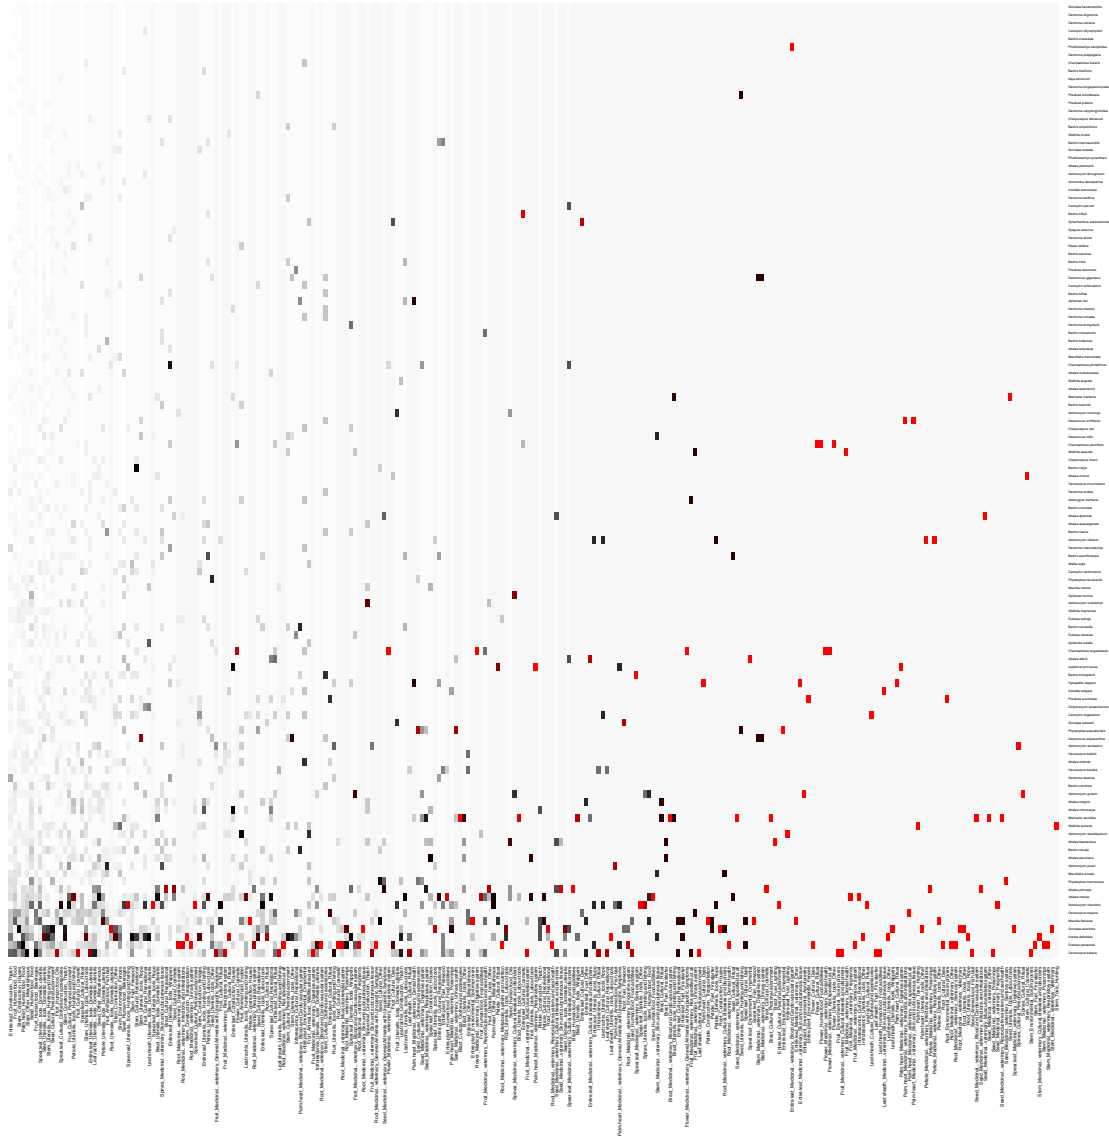

**Fig. S4.** Regional indigenous knowledge metaweb. Colors denote the number of communities that cite a given plant-service link, as in Fig. 1. The metaweb is made up of 120 plant species, 250 services, and 1743 links. For complete scientific names, see Table S3.

a

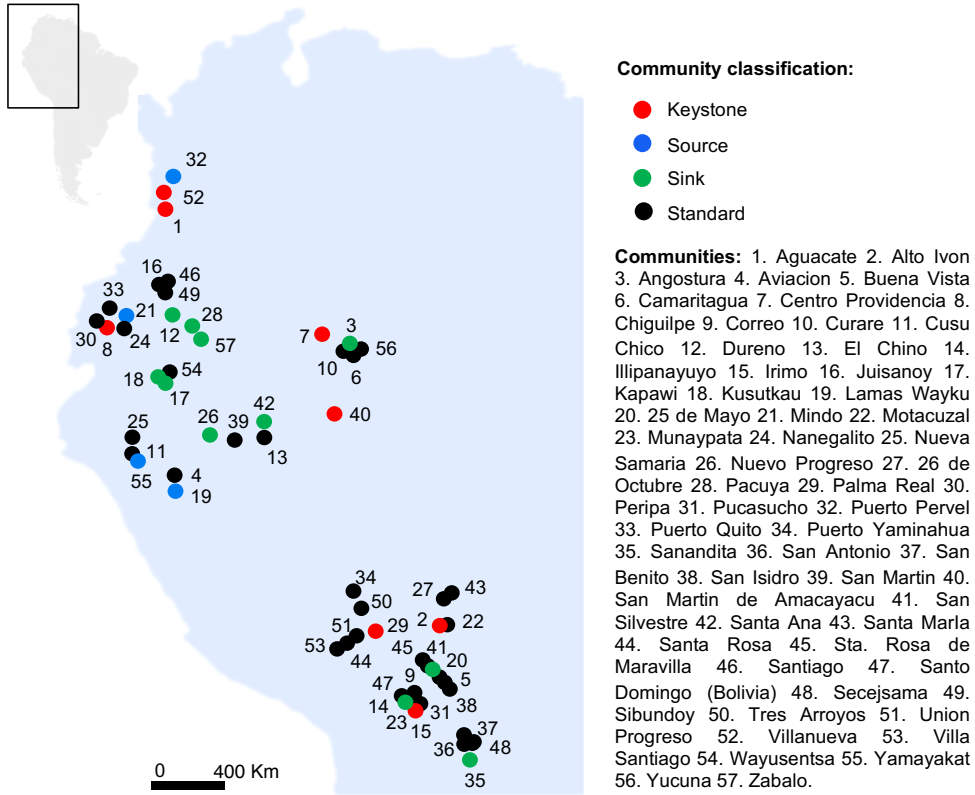

Fig. S5. Geographic distribution of keystone, source, sink and standard communities.

**Table S1. Characteristics of the 57 study communities.**

| Community name          | Ethnic group            | Country  | # Plant species | # Plant services | Type     |
|-------------------------|-------------------------|----------|-----------------|------------------|----------|
| Aguacate                | Embera                  | Colombia | 28              | 54               | keystone |
| Alto Ivon               | Chacobo                 | Bolivia  | 17              | 41               | keystone |
| Angostura               | Multi-ethnic indigenous | Colombia | 32              | 58               | sink     |
| Aviacion                | Chanka                  | Peru     | 15              | 33               | standard |
| Buena Vista             | Mestizo-Tacana          | Bolivia  | 13              | 24               | standard |
| Camaritagua             | Multi-ethnic indigenous | Colombia | 41              | 81               | standard |
| Centro Providencia      | Multi-ethnic indigenous | Colombia | 37              | 79               | keystone |
| Chiguilpe               | Tsachila                | Ecuador  | 13              | 50               | keystone |
| Correo                  | Leco                    | Bolivia  | 11              | 25               | standard |
| Curare                  | Multi-ethnic indigenous | Colombia | 30              | 71               | standard |
| Cusu Chico              | Aguaruna                | Peru     | 14              | 21               | standard |
| Dureno                  | Cofan                   | Ecuador  | 29              | 37               | sink     |
| El Chino                | Mestizo                 | Bolivia  | 31              | 60               | standard |
| Illipanayuyo            | Leco                    | Bolivia  | 12              | 29               | standard |
| Irimo                   | Leco                    | Bolivia  | 11              | 42               | keystone |
| Juisanoy                | Inga                    | Colombia | 8               | 12               | standard |
| Kapawi                  | Achuar                  | Ecuador  | 26              | 38               | sink     |
| Kusutkau                | Achuar                  | Ecuador  | 23              | 34               | sink     |
| Lamas Wayku             | Chanka                  | Peru     | 19              | 48               | source   |
| 25 de Mayo              | Mestizo-Tacana          | Bolivia  | 10              | 17               | sink     |
| Mindo                   | Mestizo                 | Ecuador  | 9               | 23               | source   |
| Motacuzal               | Chacobo                 | Bolivia  | 17              | 20               | standard |
| Munaypata               | Leco                    | Bolivia  | 10              | 20               | sink     |
| Nanegalito              | Mestizo                 | Ecuador  | 10              | 23               | standard |
| Nueva Samaria           | Aguaruna                | Peru     | 15              | 27               | standard |
| Nuevo Progreso          | Mestizo-Urarina         | Peru     | 17              | 29               | sink     |
| 26 de Octubre           | Mestizo                 | Bolivia  | 15              | 36               | standard |
| Pacuya                  | Cofan                   | Ecuador  | 25              | 37               | sink     |
| Palma Real              | Ese Eja                 | Peru     | 19              | 54               | keystone |
| Peripa                  | Tsachila                | Ecuador  | 12              | 35               | standard |
| Pucasucho               | Leco                    | Bolivia  | 12              | 15               | standard |
| Puerto Povel            | Afro-American           | Colombia | 20              | 62               | source   |
| Puerto Quito            | Mestizo                 | Ecuador  | 7               | 24               | standard |
| Puerto Yaminahua        | Yaminahua               | Bolivia  | 10              | 16               | standard |
| Sanandita               | Yuracare                | Bolivia  | 10              | 15               | sink     |
| San Antonio             | Yuracare                | Bolivia  | 12              | 19               | standard |
| San Benito              | Yuracare                | Bolivia  | 11              | 25               | standard |
| San Isidro              | Leco-Tacana             | Bolivia  | 13              | 19               | standard |
| San Martin              | Cocama                  | Peru     | 30              | 65               | standard |
| San Martin de Amacayacu | Tikuna                  | Colombia | 39              | 94               | keystone |
| San Silvestre           | Tacana                  | Bolivia  | 13              | 22               | standard |
| Santa Ana               | Mestizo                 | Peru     | 27              | 50               | sink     |
| Santa Marla             | Mestizo                 | Bolivia  | 18              | 50               | standard |
| Santa Rosa              | Mestizo                 | Peru     | 15              | 18               | standard |
| Sta. Rosa de Maravilla  | Mestizo-Tacana          | Bolivia  | 12              | 20               | standard |
| Santiago                | Inga                    | Colombia | 12              | 27               | standard |
| Santo Domingo (Bolivia) | Leco                    | Bolivia  | 11              | 28               | standard |
| Secejsama               | Yuracare                | Bolivia  | 10              | 18               | standard |
| Sibundoy                | Camsa                   | Colombia | 9               | 34               | standard |
| Tres Arroyos            | Mestizo                 | Bolivia  | 10              | 22               | standard |
| Union Progreso          | Mestizo                 | Peru     | 15              | 17               | standard |
| Villanueva              | Embera                  | Colombia | 23              | 46               | keystone |
| Villa Santiago          | Mestizo-Amakaeri        | Peru     | 17              | 41               | standard |
| Wayusentsa              | Achuar                  | Ecuador  | 24              | 43               | standard |
| Yamayakat               | Aguaruna                | Peru     | 15              | 40               | source   |
| Yucuna                  | Multi-ethnic indigenous | Colombia | 25              | 57               | standard |
| Zabalo                  | Cofan                   | Ecuador  | 25              | 29               | sink     |

**Table S2. Mantel test results between knowledge turnover measures in the 57 communities in tropical America and (A) logarithmically transformed geographic distance, (B) linguistic distance (where language was quantified using a binary presence/absence index) and (C) linguistic distance (where language was quantified as the fraction of speakers of each language per community).  $r_M$  is the Pearson correlation between matrices. Statistical significance of each correlation was established with a Monte Carlo permutation test using 999 random permutations, with  $P < 0.001$  values shown in bold.  $\beta$ , differences in the knowledge networks for every pair of indigenous communities;  $\beta_{bio}$ , differences in the knowledge networks due to plants and services (node) turnover,  $\beta_{cul}$ , differences in the knowledge networks due to knowledge (link) turnover;  $\beta_{bio}/\beta$ , relative importance of biological heritage in explaining differences in the knowledge networks;  $\beta_{cul}/\beta$ , relative importance of cultural heritage in explaining differences in the knowledge networks.  $\beta'$ , difference of each local community to the indigenous knowledge metaweb.**

| Knowledge           | (A) Geographic |            | (B) Language (binary) |            |                     |            | (C) Language (fraction) |            |                     |            |
|---------------------|----------------|------------|-----------------------|------------|---------------------|------------|-------------------------|------------|---------------------|------------|
|                     | Mantel test    |            | Mantel test           |            | Partial Mantel test |            | Mantel test             |            | Partial Mantel test |            |
|                     | $r_M$          | $P$ -value | $r_M$                 | $P$ -value | $r_M$               | $P$ -value | $r_M$                   | $P$ -value | $r_M$               | $P$ -value |
| $\beta$             | <b>0.696</b>   | 0.001      | <b>0.368</b>          | 0.001      | <b>0.138</b>        | 0.004      | <b>0.291</b>            | 0.001      | 0.006               | 0.443      |
| $\beta_{bio}$       | <b>0.479</b>   | 0.001      | <b>0.261</b>          | 0.001      | <b>0.088</b>        | 0.009      | <b>0.257</b>            | 0.001      | 0.075               | 0.085      |
| $\beta_{cul}$       | <b>0.358</b>   | 0.001      | <b>0.182</b>          | 0.001      | 0.046               | 0.175      | 0.096                   | 0.072      | -0.061              | 0.800      |
| $\beta_{bio}/\beta$ | <b>0.122</b>   | 0.001      | 0.078                 | 0.078      | 0.032               | 0.228      | 0.118                   | 0.010      | 0.075               | 0.084      |
| $\beta_{cul}/\beta$ | -0.122         | 1.000      | -0.078                | 0.989      | -0.032              | 0.770      | -0.118                  | 0.980      | -0.075              | 0.907      |
| $\beta'$            | <b>0.111</b>   | 0.005      | 0.060                 | 0.084      | 0.018               | 0.363      | -0.021                  | 0.638      | -0.074              | 0.874      |
| Language (binary)   | <b>0.398</b>   | 0.001      | -                     | -          | -                   | -          | -                       | -          | -                   | -          |
| Language (fraction) | <b>0.413</b>   | 0.001      | -                     | -          | -                   | -          | -                       | -          | -                   | -          |



**Table S3. List of scientific names of the 120 palm species studied.**

---

|                                                                    |                                                      |
|--------------------------------------------------------------------|------------------------------------------------------|
| <i>Aiphanes horrida</i> (Jacq.) Burret                             | <i>Desmoncus cirrhifer</i> A.H.Gentry & Zardini      |
| <i>Aiphanes ulei</i> (Dammer) Burret                               | <i>Desmoncus giganteus</i> A.J.Hend.                 |
| <i>Ammandra decasperma</i> O.F.Cook                                | <i>Desmoncus mitis</i> Mart.                         |
| <i>Aphandra natalia</i> (Balslev & A.J.Hend.) Barfod               | <i>Desmoncus polyacanthos</i> Mart.                  |
| <i>Asterogyne martiana</i> (H.Wendl.) H.Wendl. ex Drude            | <i>Dictyocaryum lamarckianum</i> (Mart.) H.Wendl.    |
| <i>Astrocaryum aculeatum</i> G.Mey.                                | <i>Elaeis oleifera</i> (Kunth) Cortés                |
| <i>Astrocaryum chambira</i> Burret                                 | <i>Euterpe catinga</i> Wallace                       |
| <i>Astrocaryum ciliatum</i> F.Kahn & B.Millán                      | <i>Euterpe oleracea</i> Mart.                        |
| <i>Astrocaryum ferrugineum</i> F.Kahn & B.Millán                   | <i>Euterpe precatoria</i> Mart.                      |
| <i>Astrocaryum gratum</i> F.Kahn & B.Millán                        | <i>Geonoma brongniartii</i> Mart.                    |
| <i>Astrocaryum huicungo</i> Dammer ex Burret                       | <i>Geonoma calyptrogynoides</i> Burret               |
| <i>Astrocaryum jauari</i> Mart.                                    | <i>Geonoma camana</i> Trail                          |
| <i>Astrocaryum standleyanum</i> L.H.Bailey                         | <i>Geonoma cuneata</i> H.Wendl. ex Spruce            |
| <i>Astrocaryum urostachys</i> Burret                               | <i>Geonoma deversa</i> (Poit.) Kunth                 |
| <i>Attalea allenii</i> H.E.Moore                                   | <i>Geonoma laxiflora</i> Mart.                       |
| <i>Attalea bassleriana</i> (Burret) Zona                           | <i>Geonoma longepedunculata</i> Burret               |
| <i>Attalea butyracea</i> (Mutis ex L.f.) Wess.Boer                 | <i>Geonoma macrostachys</i> Mart.                    |
| <i>Attalea colenda</i> (O.F.Cook) Balslev & A.J.Hend.              | <i>Geonoma maxima</i> (Poit.) Kunth                  |
| <i>Attalea cuatrecasana</i> (Dugand) A.J.Hend., Galeano & R.Bernal | <i>Geonoma oligoclona</i> Trail                      |
| <i>Attalea insignis</i> (Mart.) Drude                              | <i>Geonoma poeppigiana</i> Mart.                     |
| <i>Attalea maripa</i> (Aubl.) Mart.                                | <i>Geonoma stricta</i> (Poit.) Kunth                 |
| <i>Attalea microcarpa</i> Mart.                                    | <i>Geonoma undata</i> Klotzsch                       |
| <i>Attalea moorei</i> (Glassman) Zona                              | <i>Hyospathe elegans</i> Mart.                       |
| <i>Attalea peruviana</i> Zona                                      | <i>Iriartea deltoidea</i> Ruiz & Pav.                |
| <i>Attalea plowmanii</i> (Glassman) Zona                           | <i>Iriartella setigera</i> (Mart.) H.Wendl.          |
| <i>Attalea princeps</i> Mart.                                      | <i>Iriartella stenocarpa</i> (Mart.) H.Wendl.        |
| <i>Attalea septuagenata</i> Dugand                                 | <i>Itaya amicornum</i> H.E.Moore                     |
| <i>Attalea speciosa</i> Mart.                                      | <i>Lepidocaryum tenue</i> Mart.                      |
| <i>Attalea tessmannii</i> Burret                                   | <i>Manicaria martiana</i> Burret                     |
| <i>Bactris acanthocarpa</i> Mart.                                  | <i>Manicaria saccifera</i> Gaertn.                   |
| <i>Bactris barronis</i> L.H.Bailey                                 | <i>Mauritia carana</i> Wallace                       |
| <i>Bactris bidentula</i> Spruce                                    | <i>Mauritia flexuosa</i> L.f.                        |
| <i>Bactris bifida</i> Mart.                                        | <i>Mauritiella armata</i> (Mart.) Burret             |
| <i>Bactris brongniartii</i> Mart.                                  | <i>Mauritiella macroclada</i> (Burret) Burret        |
| <i>Bactris chaveziae</i> A.J.Hend.                                 | <i>Oenocarpus bacaba</i> Mart.                       |
| <i>Bactris coloniata</i> L.H.Bailey                                | <i>Oenocarpus balickii</i> F.Kahn                    |
| <i>Bactris coloradonis</i> L.H.Bailey                              | <i>Oenocarpus bataua</i> Mart.                       |
| <i>Bactris concinna</i> Mart.                                      | <i>Oenocarpus circumtextus</i> Mart.                 |
| <i>Bactris corossilla</i> H.Karst.                                 | <i>Oenocarpus mapora</i> H.Karst.                    |
| <i>Bactris fissifrons</i> Mart.                                    | <i>Pholidostachys dactyloides</i> H.E.Moore          |
| <i>Bactris hirta</i> Mart.                                         | <i>Pholidostachys synanthera</i> (Mart.) H.E.Moore   |
| <i>Bactris killipii</i> Burret                                     | <i>Phytelephas aequatorialis</i> Spruce              |
| <i>Bactris macroacantha</i> Mart.                                  | <i>Phytelephas macrocarpa</i> Ruiz & Pav.            |
| <i>Bactris major</i> Jacq.                                         | <i>Phytelephas tenuicaulis</i> (Barfod) A.J.Hend.    |
| <i>Bactris maraja</i> Mart.                                        | <i>Prestoea acuminata</i> (Willd.) H.E.Moore         |
| <i>Bactris riparia</i> Mart.                                       | <i>Prestoea decurrens</i> H.E.Moore                  |
| <i>Bactris setulosa</i> H.Karst.                                   | <i>Prestoea pubens</i> H.E.Moore                     |
| <i>Bactris simplicifrons</i> Mart.                                 | <i>Prestoea schultzeana</i> (Burret) H.E.Moore       |
| <i>Ceroxylon echinulatum</i> Galeano                               | <i>Socratea exorrhiza</i> (Mart.) H.Wendl.           |
| <i>Ceroxylon parvum</i> Galeano                                    | <i>Socratea hecatonandra</i> (Dugand) R.Bernal       |
| <i>Ceroxylon pityrophyllum</i> (Mart.) Mart. ex H.Wendl.           | <i>Socratea rostrata</i> Burret                      |
| <i>Ceroxylon ventricosum</i> Burret                                | <i>Socratea salazarii</i> H.E.Moore                  |
| <i>Ceroxylon vogelianum</i> (Engel) H.Wendl.                       | <i>Syagrus sancona</i> (Kunth) H.Karst.              |
| <i>Chamaedorea angustisecta</i> Burret                             | <i>Synechanthus warszewiczianus</i> H.Wendl.         |
| <i>Chamaedorea linearis</i> (Ruiz & Pav.) Mart.                    | <i>Welfia regia</i> H.Wendl.                         |
| <i>Chamaedorea pauciflora</i> Mart.                                | <i>Wettinia aequalis</i> (O.F.Cook & Doyle) R.Bernal |
| <i>Chamaedorea pinnatifrons</i> (Jacq.) Oerst.                     | <i>Wettinia augusta</i> Poepp. & Endl.               |
| <i>Chelyocarpus dianeurus</i> (Burret) H.E.Moore                   | <i>Wettinia drudei</i> (O.F.Cook & Doyle) A.J.Hend.  |
| <i>Chelyocarpus ulei</i> Dammer                                    | <i>Wettinia maynensis</i> Spruce                     |
| <i>Chelyocarpus chuco</i> (Mart.) H.E. Moore                       | <i>Wettinia quinaria</i> (O.F.Cook & Doyle) Burret   |

---

**Table S4. List of plant species and plant services in the 57 study communities.**

| Community | Plant species           | Plant service                                    |
|-----------|-------------------------|--------------------------------------------------|
| Zabalo    | Aiphanes ulei           | Stem Utensils & tools Hunting and fishing        |
| Zabalo    | Astrocaryum chambira    | Fruit Cultural Personal adornment                |
| Zabalo    | Astrocaryum chambira    | Seed Human food Food                             |
| Zabalo    | Astrocaryum chambira    | Spear leaf Cultural Clothes and accessories      |
| Zabalo    | Astrocaryum chambira    | Spear leaf Cultural Personal adornment           |
| Zabalo    | Astrocaryum chambira    | Spear leaf Utensils & tools Domestic utensils    |
| Zabalo    | Astrocaryum chambira    | Spear leaf Utensils & tools Hunting and fishing  |
| Zabalo    | Astrocaryum chambira    | Spear leaf Utensils & tools Rope                 |
| Zabalo    | Astrocaryum chambira    | Stem Other Miscellaneous                         |
| Zabalo    | Astrocaryum jauari      | Fruit Cultural Personal adornment                |
| Zabalo    | Astrocaryum jauari      | Spear leaf Cultural Clothes and accessories      |
| Zabalo    | Astrocaryum urostachys  | Fruit Cultural Personal adornment                |
| Zabalo    | Astrocaryum urostachys  | Fruit Utensils & tools Other                     |
| Zabalo    | Astrocaryum urostachys  | Seed Human food Food                             |
| Zabalo    | Astrocaryum urostachys  | Spear leaf Cultural Clothes and accessories      |
| Zabalo    | Attalea butyracea       | Entire leaf Construction Thatch                  |
| Zabalo    | Attalea butyracea       | Seed Other Miscellaneous                         |
| Zabalo    | Attalea butyracea       | Stem Other Miscellaneous                         |
| Zabalo    | Attalea insignis        | Petiole Utensils & tools Hunting and fishing     |
| Zabalo    | Attalea insignis        | Petiole Utensils & tools Labour tools            |
| Zabalo    | Attalea maripa          | Fruit Cultural Personal adornment                |
| Zabalo    | Attalea maripa          | Fruit Utensils & tools Other                     |
| Zabalo    | Attalea maripa          | Petiole Utensils & tools Domestic utensils       |
| Zabalo    | Attalea maripa          | Petiole Utensils & tools Hunting and fishing     |
| Zabalo    | Attalea maripa          | Petiole Utensils & tools Labour tools            |
| Zabalo    | Attalea maripa          | Spear leaf Cultural Clothes and accessories      |
| Zabalo    | Bactris concinna        | Seed Cultural Personal adornment                 |
| Zabalo    | Bactris concinna        | Seed Human food Food                             |
| Zabalo    | Bactris concinna        | Seed Utensils & tools Other                      |
| Zabalo    | Bactris corossilla      | Seed Human food Food                             |
| Zabalo    | Bactris maraja          | Seed Human food Food                             |
| Zabalo    | Bactris maraja          | Stem Utensils & tools Hunting and fishing        |
| Zabalo    | Desmoncus giganteus     | Seed Utensils & tools Other                      |
| Zabalo    | Euterpe precatoria      | Fruit Human food Beverages                       |
| Zabalo    | Euterpe precatoria      | Fruit Human food Food                            |
| Zabalo    | Euterpe precatoria      | Palm heart Human food Food                       |
| Zabalo    | Euterpe precatoria      | Seed Cultural Personal adornment                 |
| Zabalo    | Euterpe precatoria      | Stem Utensils & tools Hunting and fishing        |
| Zabalo    | Geonoma brongniartii    | Entire leaf Construction Thatch                  |
| Zabalo    | Geonoma macrostachys    | Entire leaf Construction Thatch                  |
| Zabalo    | Geonoma maxima          | Stem Utensils & tools Hunting and fishing        |
| Zabalo    | Geonoma stricta         | Entire leaf Utensils & tools Domestic utensils   |
| Zabalo    | Hyospathe elegans       | Palm heart Cultural Ritual                       |
| Zabalo    | Iriartea deltoidea      | Entire leaf Construction Thatch                  |
| Zabalo    | Iriartea deltoidea      | Palm heart Human food Food                       |
| Zabalo    | Iriartea deltoidea      | Seed Cultural Personal adornment                 |
| Zabalo    | Iriartea deltoidea      | Seed Human food Food                             |
| Zabalo    | Iriartea deltoidea      | Seed Utensils & tools Other                      |
| Zabalo    | Iriartea deltoidea      | Stem Construction Houses                         |
| Zabalo    | Iriartea deltoidea      | Stem Other Miscellaneous                         |
| Zabalo    | Iriartea deltoidea      | Stem Utensils & tools Hunting and fishing        |
| Zabalo    | Mauritia flexuosa       | Entire leaf Fuel Other                           |
| Zabalo    | Mauritia flexuosa       | Fruit Human food Beverages                       |
| Zabalo    | Mauritia flexuosa       | Fruit Human food Food                            |
| Zabalo    | Mauritia flexuosa       | Palm heart Human food Food                       |
| Zabalo    | Mauritia flexuosa       | Spear leaf Cultural Personal adornment           |
| Zabalo    | Mauritia flexuosa       | Spear leaf Utensils & tools Domestic utensils    |
| Zabalo    | Mauritia flexuosa       | Stem Other Miscellaneous                         |
| Zabalo    | Mauritiella armata      | Stem Utensils & tools Hunting and fishing        |
| Zabalo    | Oenocarpus bataua       | Entire leaf Construction Thatch                  |
| Zabalo    | Oenocarpus bataua       | Entire leaf Utensils & tools Domestic utensils   |
| Zabalo    | Oenocarpus bataua       | Fruit Cultural Cosmetic                          |
| Zabalo    | Oenocarpus bataua       | Fruit Human food Beverages                       |
| Zabalo    | Oenocarpus bataua       | Fruit Human food Food                            |
| Zabalo    | Oenocarpus bataua       | Fruit Human food Oils                            |
| Zabalo    | Oenocarpus bataua       | Leaf sheath Utensils & tools Hunting and fishing |
| Zabalo    | Oenocarpus bataua       | Palm heart Human food Food                       |
| Zabalo    | Oenocarpus bataua       | Seed Cultural Personal adornment                 |
| Zabalo    | Oenocarpus bataua       | Stem Other Miscellaneous                         |
| Zabalo    | Oenocarpus mapora       | Fruit Human food Beverages                       |
| Zabalo    | Oenocarpus mapora       | Fruit Human food Food                            |
| Zabalo    | Oenocarpus mapora       | Petiole Utensils & tools Domestic utensils       |
| Zabalo    | Oenocarpus mapora       | Stem Construction Houses                         |
| Zabalo    | Oenocarpus mapora       | Stem Utensils & tools Hunting and fishing        |
| Zabalo    | Phytelephas tenuicaulis | Entire leaf Construction Thatch                  |
| Zabalo    | Phytelephas tenuicaulis | Seed Cultural Personal adornment                 |
| Zabalo    | Phytelephas tenuicaulis | Seed Human food Food                             |
| Zabalo    | Phytelephas tenuicaulis | Seed Utensils & tools Other                      |
| Zabalo    | Prestoea schultzeana    | Seed Cultural Recreational                       |
| Zabalo    | Socratea exorrhiza      | Root Utensils & tools Domestic utensils          |
| Zabalo    | Socratea exorrhiza      | Seed Cultural Personal adornment                 |
| Zabalo    | Socratea exorrhiza      | Seed Utensils & tools Other                      |
| Zabalo    | Socratea exorrhiza      | Stem Construction Houses                         |
| Zabalo    | Socratea exorrhiza      | Stem Utensils & tools Hunting and fishing        |
| Yucuna    | Astrocaryum chambira    | Fruit Cultural Personal adornment                |
| Yucuna    | Astrocaryum chambira    | Fruit Cultural Ritual                            |
| Yucuna    | Astrocaryum chambira    | Fruit Human food Food                            |
| Yucuna    | Astrocaryum chambira    | Seed Human food Beverages                        |
| Yucuna    | Astrocaryum chambira    | Seed Human food Food                             |
| Yucuna    | Astrocaryum chambira    | Seed Other Miscellaneous                         |
| Yucuna    | Astrocaryum chambira    | Spear leaf Cultural Clothes and accessories      |
| Yucuna    | Astrocaryum chambira    | Spear leaf Cultural Personal adornment           |
| Yucuna    | Astrocaryum chambira    | Spear leaf Utensils & tools Domestic utensils    |
| Yucuna    | Astrocaryum chambira    | Spear leaf Utensils & tools Hunting and fishing  |

|        |                        |                                                                             |
|--------|------------------------|-----------------------------------------------------------------------------|
| Yucuna | Astrocaryum chambira   | Spear leaf Utensils & tools Rope                                            |
| Yucuna | Astrocaryum chambira   | Stem Other Miscellaneous                                                    |
| Yucuna | Astrocaryum ciliatum   | Leaf rachis Utensils & tools Rope                                           |
| Yucuna | Astrocaryum ciliatum   | Petiole Utensils & tools Hunting and fishing                                |
| Yucuna | Astrocaryum ciliatum   | Seed Human food Food                                                        |
| Yucuna | Astrocaryum ciliatum   | Stem Utensils & tools Hunting and fishing                                   |
| Yucuna | Astrocaryum jauari     | Fruit Animal food Fish bait                                                 |
| Yucuna | Astrocaryum jauari     | Fruit Cultural Personal adornment                                           |
| Yucuna | Astrocaryum jauari     | Seed Human food Food                                                        |
| Yucuna | Astrocaryum jauari     | Spear leaf Utensils & tools Domestic utensils                               |
| Yucuna | Astrocaryum jauari     | Stem Construction Houses                                                    |
| Yucuna | Attalea maripa         | Entire plant Human food Food additives                                      |
| Yucuna | Attalea maripa         | Fruit Human food Beverages                                                  |
| Yucuna | Attalea maripa         | Fruit Human food Food                                                       |
| Yucuna | Attalea maripa         | Fruit Human food Food additives                                             |
| Yucuna | Attalea maripa         | Petiole Utensils & tools Domestic utensils                                  |
| Yucuna | Attalea maripa         | Petiole Utensils & tools Hunting and fishing                                |
| Yucuna | Attalea maripa         | Seed Human food Food                                                        |
| Yucuna | Attalea maripa         | Spear leaf Cultural Ritual                                                  |
| Yucuna | Attalea maripa         | Stem Cultural Ritual                                                        |
| Yucuna | Attalea maripa         | Stem Human food Food additives                                              |
| Yucuna | Attalea microcarpa     | Entire leaf Construction Houses                                             |
| Yucuna | Attalea microcarpa     | Entire leaf Utensils & tools Hunting and fishing                            |
| Yucuna | Attalea microcarpa     | Petiole Utensils & tools Hunting and fishing                                |
| Yucuna | Attalea microcarpa     | Seed Human food Food                                                        |
| Yucuna | Attalea microcarpa     | Spear leaf Cultural Ritual                                                  |
| Yucuna | Attalea microcarpa     | Spear leaf Utensils & tools Domestic utensils                               |
| Yucuna | Attalea peruviana      | Entire leaf Construction Thatch                                             |
| Yucuna | Attalea peruviana      | Entire leaf Utensils & tools Hunting and fishing                            |
| Yucuna | Attalea peruviana      | Fruit Cultural Personal adornment                                           |
| Yucuna | Attalea peruviana      | Petiole Utensils & tools Hunting and fishing                                |
| Yucuna | Attalea peruviana      | Seed Human food Food                                                        |
| Yucuna | Attalea peruviana      | Spear leaf Cultural Ritual                                                  |
| Yucuna | Attalea peruviana      | Spear leaf Utensils & tools Domestic utensils                               |
| Yucuna | Attalea peruviana      | Stem Other Miscellaneous                                                    |
| Yucuna | Attalea septuagenata   | Entire leaf Utensils & tools Hunting and fishing                            |
| Yucuna | Attalea septuagenata   | Seed Human food Food                                                        |
| Yucuna | Attalea septuagenata   | Spear leaf Cultural Ritual                                                  |
| Yucuna | Bactris bidentula      | Fruit Animal food Fish bait                                                 |
| Yucuna | Bactris maraja         | Fruit Human food Food                                                       |
| Yucuna | Bactris maraja         | Stem Utensils & tools Domestic utensils                                     |
| Yucuna | Desmoncus polyacanthos | Seed Utensils & tools Other                                                 |
| Yucuna | Desmoncus polyacanthos | Stem Utensils & tools Domestic utensils                                     |
| Yucuna | Desmoncus polyacanthos | Stem Utensils & tools Other                                                 |
| Yucuna | Desmoncus polyacanthos | Stem Utensils & tools Rope                                                  |
| Yucuna | Euterpe catinga        | Entire leaf Construction Thatch                                             |
| Yucuna | Euterpe catinga        | Fruit Human food Beverages                                                  |
| Yucuna | Euterpe catinga        | Stem Construction Houses                                                    |
| Yucuna | Euterpe precatória     | Entire leaf Construction Thatch                                             |
| Yucuna | Euterpe precatória     | Fruit Animal food Fish bait                                                 |
| Yucuna | Euterpe precatória     | Fruit Human food Beverages                                                  |
| Yucuna | Euterpe precatória     | Fruit Human food Food                                                       |
| Yucuna | Euterpe precatória     | Palm heart Human food Food                                                  |
| Yucuna | Euterpe precatória     | Root Medicinal & veterinary General Ailments with Unspecific Symptoms       |
| Yucuna | Euterpe precatória     | Root Medicinal & veterinary Not specified at all                            |
| Yucuna | Euterpe precatória     | Root Medicinal & veterinary Respiratory system                              |
| Yucuna | Euterpe precatória     | Seed Cultural Personal adornment                                            |
| Yucuna | Euterpe precatória     | Stem Construction Houses                                                    |
| Yucuna | Euterpe precatória     | Stem Other Miscellaneous                                                    |
| Yucuna | Iriarteia deltoidea    | Bract Utensils & tools Domestic utensils                                    |
| Yucuna | Iriarteia deltoidea    | Entire leaf Construction Thatch                                             |
| Yucuna | Iriarteia deltoidea    | Entire leaf Fuel Fire starter                                               |
| Yucuna | Iriarteia deltoidea    | Root Utensils & tools Domestic utensils                                     |
| Yucuna | Iriarteia deltoidea    | Stem Construction Bridges                                                   |
| Yucuna | Iriarteia deltoidea    | Stem Construction Houses                                                    |
| Yucuna | Iriarteia deltoidea    | Stem Construction Other                                                     |
| Yucuna | Iriarteia deltoidea    | Stem Construction Thatch                                                    |
| Yucuna | Iriarteia deltoidea    | Stem Construction Transportation                                            |
| Yucuna | Iriarteia deltoidea    | Stem Utensils & tools Domestic utensils                                     |
| Yucuna | Iriarteia deltoidea    | Stem Utensils & tools Hunting and fishing                                   |
| Yucuna | Iriartella setigera    | Stem Construction Houses                                                    |
| Yucuna | Iriartella setigera    | Stem Construction Thatch                                                    |
| Yucuna | Iriartella setigera    | Stem Utensils & tools Domestic utensils                                     |
| Yucuna | Iriartella setigera    | Stem Utensils & tools Hunting and fishing                                   |
| Yucuna | Lepidocaryum tenue     | Entire leaf Construction Thatch                                             |
| Yucuna | Lepidocaryum tenue     | Palm heart Medicinal & veterinary General Ailments with Unspecific Symptoms |
| Yucuna | Lepidocaryum tenue     | Palm heart Medicinal & veterinary Respiratory system                        |
| Yucuna | Lepidocaryum tenue     | Petiole Cultural Ritual                                                     |
| Yucuna | Lepidocaryum tenue     | Spear leaf Utensils & tools Hunting and fishing                             |
| Yucuna | Lepidocaryum tenue     | Spear leaf Utensils & tools Rope                                            |
| Yucuna | Manicaria saccifera    | Entire leaf Construction Thatch                                             |
| Yucuna | Manicaria saccifera    | Palm heart Medicinal & veterinary Dental health                             |
| Yucuna | Manicaria saccifera    | Spear leaf Utensils & tools Domestic utensils                               |
| Yucuna | Mauritia carana        | Fruit Human food Food                                                       |
| Yucuna | Mauritia carana        | Petiole Utensils & tools Domestic utensils                                  |
| Yucuna | Mauritia carana        | Petiole Utensils & tools Hunting and fishing                                |
| Yucuna | Mauritia carana        | Stem Construction Houses                                                    |

|           |                         |                                                             |
|-----------|-------------------------|-------------------------------------------------------------|
| Yucuna    | Mauritia carana         | Stem Other Miscellaneous                                    |
| Yucuna    | Mauritia carana         | Stem Utensils & tools Domestic utensils                     |
| Yucuna    | Mauritia flexuosa       | Entire leaf Construction Thatch                             |
| Yucuna    | Mauritia flexuosa       | Entire leaf Fuel Fire starter                               |
| Yucuna    | Mauritia flexuosa       | Fruit Animal food Fish bait                                 |
| Yucuna    | Mauritia flexuosa       | Fruit Animal food Fodder                                    |
| Yucuna    | Mauritia flexuosa       | Fruit Cultural Ritual                                       |
| Yucuna    | Mauritia flexuosa       | Fruit Human food Beverages                                  |
| Yucuna    | Mauritia flexuosa       | Fruit Human food Food                                       |
| Yucuna    | Mauritia flexuosa       | Fruit Human food Oils                                       |
| Yucuna    | Mauritia flexuosa       | Petiole Utensils & tools Domestic utensils                  |
| Yucuna    | Mauritia flexuosa       | Petiole Utensils & tools Hunting and fishing                |
| Yucuna    | Mauritia flexuosa       | Seed Human food Food additives                              |
| Yucuna    | Mauritia flexuosa       | Stem Construction Thatch                                    |
| Yucuna    | Mauritia flexuosa       | Stem Other Miscellaneous                                    |
| Yucuna    | Mauritiella armata      | Entire leaf Construction Thatch                             |
| Yucuna    | Mauritiella armata      | Fruit Human food Beverages                                  |
| Yucuna    | Mauritiella armata      | Fruit Human food Food                                       |
| Yucuna    | Mauritiella armata      | Fruit Human food Oils                                       |
| Yucuna    | Mauritiella armata      | Petiole Utensils & tools Domestic utensils                  |
| Yucuna    | Mauritiella armata      | Petiole Utensils & tools Hunting and fishing                |
| Yucuna    | Mauritiella armata      | Stem Construction Houses                                    |
| Yucuna    | Mauritiella armata      | Stem Other Miscellaneous                                    |
| Yucuna    | Mauritiella armata      | Stem Utensils & tools Domestic utensils                     |
| Yucuna    | Oenocarpus bacaba       | Entire leaf Construction Thatch                             |
| Yucuna    | Oenocarpus bacaba       | Entire leaf Utensils & tools Domestic utensils              |
| Yucuna    | Oenocarpus bacaba       | Entire plant Human food Food additives                      |
| Yucuna    | Oenocarpus bacaba       | Fruit Cultural Ritual                                       |
| Yucuna    | Oenocarpus bacaba       | Fruit Human food Beverages                                  |
| Yucuna    | Oenocarpus bacaba       | Fruit Human food Food                                       |
| Yucuna    | Oenocarpus bacaba       | Fruit Human food Oils                                       |
| Yucuna    | Oenocarpus bacaba       | Inflorescence Cultural Ritual                               |
| Yucuna    | Oenocarpus bacaba       | Leaf sheath Utensils & tools Hunting and fishing            |
| Yucuna    | Oenocarpus bacaba       | Palm heart Human food Food                                  |
| Yucuna    | Oenocarpus bacaba       | Stem Other Miscellaneous                                    |
| Yucuna    | Oenocarpus balickii     | Entire leaf Construction Thatch                             |
| Yucuna    | Oenocarpus balickii     | Entire leaf Utensils & tools Domestic utensils              |
| Yucuna    | Oenocarpus balickii     | Fruit Human food Beverages                                  |
| Yucuna    | Oenocarpus balickii     | Fruit Human food Food                                       |
| Yucuna    | Oenocarpus balickii     | Palm heart Human food Food                                  |
| Yucuna    | Oenocarpus balickii     | Stem Other Miscellaneous                                    |
| Yucuna    | Oenocarpus bataua       | Entire leaf Construction Thatch                             |
| Yucuna    | Oenocarpus bataua       | Entire leaf Utensils & tools Domestic utensils              |
| Yucuna    | Oenocarpus bataua       | Entire plant Human food Food additives                      |
| Yucuna    | Oenocarpus bataua       | Fruit Cultural Ritual                                       |
| Yucuna    | Oenocarpus bataua       | Fruit Human food Beverages                                  |
| Yucuna    | Oenocarpus bataua       | Fruit Human food Food                                       |
| Yucuna    | Oenocarpus bataua       | Fruit Human food Food additives                             |
| Yucuna    | Oenocarpus bataua       | Fruit Human food Oils                                       |
| Yucuna    | Oenocarpus bataua       | Inflorescence Cultural Recreational                         |
| Yucuna    | Oenocarpus bataua       | Inflorescence Cultural Ritual                               |
| Yucuna    | Oenocarpus bataua       | Leaf sheath Cultural Ritual                                 |
| Yucuna    | Oenocarpus bataua       | Leaf sheath Human food Food additives                       |
| Yucuna    | Oenocarpus bataua       | Leaf sheath Utensils & tools Hunting and fishing            |
| Yucuna    | Oenocarpus bataua       | Palm heart Human food Food                                  |
| Yucuna    | Oenocarpus bataua       | Seed Human food Food additives                              |
| Yucuna    | Oenocarpus bataua       | Stem Other Miscellaneous                                    |
| Yucuna    | Oenocarpus circumtextus | Entire leaf Construction Thatch                             |
| Yucuna    | Oenocarpus circumtextus | Fruit Human food Beverages                                  |
| Yucuna    | Oenocarpus circumtextus | Fruit Human food Food                                       |
| Yucuna    | Oenocarpus circumtextus | Fruit Human food Oils                                       |
| Yucuna    | Oenocarpus circumtextus | Petiole Utensils & tools Hunting and fishing                |
| Yucuna    | Oenocarpus mapora       | Entire leaf Construction Thatch                             |
| Yucuna    | Oenocarpus mapora       | Entire leaf Cultural Dyes                                   |
| Yucuna    | Oenocarpus mapora       | Fruit Human food Beverages                                  |
| Yucuna    | Oenocarpus mapora       | Fruit Human food Food                                       |
| Yucuna    | Oenocarpus mapora       | Fruit Human food Oils                                       |
| Yucuna    | Oenocarpus mapora       | Palm heart Human food Food                                  |
| Yucuna    | Oenocarpus mapora       | Petiole Utensils & tools Hunting and fishing                |
| Yucuna    | Oenocarpus mapora       | Stem Other Miscellaneous                                    |
| Yucuna    | Socratea exorrhiza      | Entire leaf Construction Thatch                             |
| Yucuna    | Socratea exorrhiza      | Root Utensils & tools Domestic utensils                     |
| Yucuna    | Socratea exorrhiza      | Stem Construction Houses                                    |
| Yucuna    | Socratea exorrhiza      | Stem Construction Thatch                                    |
| Yucuna    | Socratea exorrhiza      | Stem Construction Transportation                            |
| Yucuna    | Socratea exorrhiza      | Stem Utensils & tools Hunting and fishing                   |
| Yamayakat | Astrocaryum chambira    | Fruit Cultural Recreational                                 |
| Yamayakat | Astrocaryum chambira    | Fruit Human food Food                                       |
| Yamayakat | Astrocaryum chambira    | Infrutescence Utensils & tools Domestic utensils            |
| Yamayakat | Astrocaryum chambira    | Leaf rachis Cultural Ritual                                 |
| Yamayakat | Astrocaryum chambira    | Leaf rachis Utensils & tools Domestic utensils              |
| Yamayakat | Astrocaryum chambira    | Palm heart Human food Food                                  |
| Yamayakat | Astrocaryum chambira    | Palm heart Medicinal & veterinary Poisonings                |
| Yamayakat | Astrocaryum chambira    | Petiole Utensils & tools Hunting and fishing                |
| Yamayakat | Astrocaryum chambira    | Seed Human food Food                                        |
| Yamayakat | Astrocaryum chambira    | Seed Medicinal & veterinary Pregnancy, birth and puerperial |
| Yamayakat | Astrocaryum chambira    | Spear leaf Cultural Clothes and accessories                 |

|           |                                  |                                                                    |
|-----------|----------------------------------|--------------------------------------------------------------------|
| Yamayakat | <i>Astrocaryum chambira</i>      | Spear leaf Utensils & tools Hunting and fishing                    |
| Yamayakat | <i>Astrocaryum chambira</i>      | Spear leaf Utensils & tools Rope                                   |
| Yamayakat | <i>Astrocaryum chambira</i>      | Stem Construction Houses                                           |
| Yamayakat | <i>Astrocaryum chambira</i>      | Stem Other Miscellaneous                                           |
| Yamayakat | <i>Astrocaryum chambira</i>      | Stem Utensils & tools Hunting and fishing                          |
| Yamayakat | <i>Attalea maripa</i>            | Entire leaf Construction Thatch                                    |
| Yamayakat | <i>Attalea maripa</i>            | Fruit Human food Food                                              |
| Yamayakat | <i>Attalea maripa</i>            | Palm heart Human food Food                                         |
| Yamayakat | <i>Attalea maripa</i>            | Petiole Utensils & tools Hunting and fishing                       |
| Yamayakat | <i>Attalea maripa</i>            | Stem Construction Houses                                           |
| Yamayakat | <i>Attalea maripa</i>            | Stem Other Miscellaneous                                           |
| Yamayakat | <i>Attalea maripa</i>            | Stem Utensils & tools Hunting and fishing                          |
| Yamayakat | <i>Bactris brongniartii</i>      | Entire leaf Construction Thatch                                    |
| Yamayakat | <i>Bactris brongniartii</i>      | Fruit Human food Food                                              |
| Yamayakat | <i>Bactris brongniartii</i>      | Leaf rachis Utensils & tools Domestic utensils                     |
| Yamayakat | <i>Bactris brongniartii</i>      | Palm heart Human food Food                                         |
| Yamayakat | <i>Bactris brongniartii</i>      | Palm heart Medicinal & veterinary Blood and Cardio-vascular system |
| Yamayakat | <i>Bactris brongniartii</i>      | Seed Human food Food                                               |
| Yamayakat | <i>Bactris brongniartii</i>      | Spear leaf Medicinal & veterinary Sensory system                   |
| Yamayakat | <i>Bactris brongniartii</i>      | Stem Construction Houses                                           |
| Yamayakat | <i>Bactris brongniartii</i>      | Stem Cultural Clothes and accessories                              |
| Yamayakat | <i>Bactris brongniartii</i>      | Stem Fuel Firewood                                                 |
| Yamayakat | <i>Bactris brongniartii</i>      | Stem Utensils & tools Domestic utensils                            |
| Yamayakat | <i>Bactris brongniartii</i>      | Stem Utensils & tools Hunting and fishing                          |
| Yamayakat | <i>Bactris brongniartii</i>      | Stem Utensils & tools Labour tools                                 |
| Yamayakat | <i>Desmoncus polyacanthos</i>    | Stem Construction Houses                                           |
| Yamayakat | <i>Desmoncus polyacanthos</i>    | Stem Utensils & tools Domestic utensils                            |
| Yamayakat | <i>Desmoncus polyacanthos</i>    | Stem Utensils & tools Rope                                         |
| Yamayakat | <i>Euterpe precatoria</i>        | Entire leaf Construction Thatch                                    |
| Yamayakat | <i>Euterpe precatoria</i>        | Fruit Human food Food                                              |
| Yamayakat | <i>Euterpe precatoria</i>        | Palm heart Human food Food                                         |
| Yamayakat | <i>Euterpe precatoria</i>        | Root Medicinal & veterinary Digestive system                       |
| Yamayakat | <i>Euterpe precatoria</i>        | Root Medicinal & veterinary Pregnancy, birth and puerperial        |
| Yamayakat | <i>Euterpe precatoria</i>        | Stem Construction Houses                                           |
| Yamayakat | <i>Geonoma macrostachys</i>      | Entire leaf Construction Thatch                                    |
| Yamayakat | <i>Hyospathe elegans</i>         | Entire leaf Construction Thatch                                    |
| Yamayakat | <i>Hyospathe elegans</i>         | Spear leaf Utensils & tools Wrappers                               |
| Yamayakat | <i>Iriarteia deltoidea</i>       | Entire leaf Construction Thatch                                    |
| Yamayakat | <i>Iriarteia deltoidea</i>       | Palm heart Human food Food                                         |
| Yamayakat | <i>Iriarteia deltoidea</i>       | Palm heart Medicinal & veterinary Blood and Cardio-vascular system |
| Yamayakat | <i>Iriarteia deltoidea</i>       | Seed Human food Food                                               |
| Yamayakat | <i>Iriarteia deltoidea</i>       | Spear leaf Utensils & tools Wrappers                               |
| Yamayakat | <i>Iriarteia deltoidea</i>       | Stem Construction Houses                                           |
| Yamayakat | <i>Iriarteia deltoidea</i>       | Stem Other Miscellaneous                                           |
| Yamayakat | <i>Iriarteia deltoidea</i>       | Stem Utensils & tools Domestic utensils                            |
| Yamayakat | <i>Iriarteia deltoidea</i>       | Stem Utensils & tools Hunting and fishing                          |
| Yamayakat | <i>Iriarteia deltoidea</i>       | Stem Utensils & tools Labour tools                                 |
| Yamayakat | <i>Mauritia flexuosa</i>         | Entire leaf Construction Thatch                                    |
| Yamayakat | <i>Mauritia flexuosa</i>         | Fruit Human food Beverages                                         |
| Yamayakat | <i>Mauritia flexuosa</i>         | Fruit Human food Food                                              |
| Yamayakat | <i>Mauritia flexuosa</i>         | Palm heart Human food Food                                         |
| Yamayakat | <i>Mauritia flexuosa</i>         | Palm heart Medicinal & veterinary Poisonings                       |
| Yamayakat | <i>Mauritia flexuosa</i>         | Petiole Construction Houses                                        |
| Yamayakat | <i>Mauritia flexuosa</i>         | Petiole Cultural Recreational                                      |
| Yamayakat | <i>Mauritia flexuosa</i>         | Petiole Utensils & tools Domestic utensils                         |
| Yamayakat | <i>Mauritia flexuosa</i>         | Stem Other Miscellaneous                                           |
| Yamayakat | <i>Oenocarpus bataua</i>         | Entire leaf Construction Thatch                                    |
| Yamayakat | <i>Oenocarpus bataua</i>         | Fruit Human food Beverages                                         |
| Yamayakat | <i>Oenocarpus bataua</i>         | Fruit Human food Food                                              |
| Yamayakat | <i>Oenocarpus bataua</i>         | Palm heart Human food Food                                         |
| Yamayakat | <i>Oenocarpus bataua</i>         | Petiole Utensils & tools Hunting and fishing                       |
| Yamayakat | <i>Oenocarpus bataua</i>         | Spear leaf Utensils & tools Domestic utensils                      |
| Yamayakat | <i>Oenocarpus bataua</i>         | Stem Construction Houses                                           |
| Yamayakat | <i>Oenocarpus bataua</i>         | Stem Other Miscellaneous                                           |
| Yamayakat | <i>Oenocarpus bataua</i>         | Stem Utensils & tools Domestic utensils                            |
| Yamayakat | <i>Oenocarpus bataua</i>         | Stem Utensils & tools Hunting and fishing                          |
| Yamayakat | <i>Oenocarpus mapora</i>         | Entire leaf Construction Thatch                                    |
| Yamayakat | <i>Oenocarpus mapora</i>         | Fruit Human food Beverages                                         |
| Yamayakat | <i>Oenocarpus mapora</i>         | Fruit Human food Food                                              |
| Yamayakat | <i>Oenocarpus mapora</i>         | Fruit Medicinal & veterinary Blood and Cardio-vascular system      |
| Yamayakat | <i>Oenocarpus mapora</i>         | Palm heart Human food Food                                         |
| Yamayakat | <i>Oenocarpus mapora</i>         | Palm heart Medicinal & veterinary Blood and Cardio-vascular system |
| Yamayakat | <i>Oenocarpus mapora</i>         | Palm heart Medicinal & veterinary Not specified at all             |
| Yamayakat | <i>Oenocarpus mapora</i>         | Seed Human food Beverages                                          |
| Yamayakat | <i>Oenocarpus mapora</i>         | Spear leaf Cultural Recreational                                   |
| Yamayakat | <i>Oenocarpus mapora</i>         | Stem Construction Houses                                           |
| Yamayakat | <i>Oenocarpus mapora</i>         | Stem Construction Thatch                                           |
| Yamayakat | <i>Oenocarpus mapora</i>         | Stem Other Miscellaneous                                           |
| Yamayakat | <i>Pholidostachys synanthera</i> | Entire leaf Construction Thatch                                    |
| Yamayakat | <i>Socratea exorrhiza</i>        | Entire leaf Construction Thatch                                    |
| Yamayakat | <i>Socratea exorrhiza</i>        | Leaf rachis Construction Thatch                                    |
| Yamayakat | <i>Socratea exorrhiza</i>        | Palm heart Human food Food                                         |
| Yamayakat | <i>Socratea exorrhiza</i>        | Palm heart Medicinal & veterinary Blood and Cardio-vascular system |
| Yamayakat | <i>Socratea exorrhiza</i>        | Palm heart Medicinal & veterinary Poisonings                       |
| Yamayakat | <i>Socratea exorrhiza</i>        | Root Cultural Ritual                                               |
| Yamayakat | <i>Socratea exorrhiza</i>        | Root Utensils & tools Domestic utensils                            |
| Yamayakat | <i>Socratea exorrhiza</i>        | Seed Human food Food                                               |

|            |                          |                                                                    |
|------------|--------------------------|--------------------------------------------------------------------|
| Yamayakat  | Socratea exorrhiza       | Stem Construction Houses                                           |
| Yamayakat  | Socratea exorrhiza       | Stem Other Miscellaneous                                           |
| Yamayakat  | Socratea exorrhiza       | Stem Utensils & tools Hunting and fishing                          |
| Yamayakat  | Socratea salazarii       | Entire leaf Construction Thatch                                    |
| Yamayakat  | Socratea salazarii       | Palm heart Human food Food                                         |
| Yamayakat  | Socratea salazarii       | Stem Construction Houses                                           |
| Yamayakat  | Socratea salazarii       | Stem Other Miscellaneous                                           |
| Yamayakat  | Socratea salazarii       | Stem Utensils & tools Hunting and fishing                          |
| Yamayakat  | Wettinia maynensis       | Entire leaf Construction Thatch                                    |
| Yamayakat  | Wettinia maynensis       | Fruit Human food Food                                              |
| Yamayakat  | Wettinia maynensis       | Palm heart Human food Food                                         |
| Yamayakat  | Wettinia maynensis       | Seed Human food Food                                               |
| Yamayakat  | Wettinia maynensis       | Stem Construction Houses                                           |
| Yamayakat  | Wettinia maynensis       | Stem Other Miscellaneous                                           |
| Yamayakat  | Wettinia maynensis       | Stem Utensils & tools Hunting and fishing                          |
| Wayusentsa | Aiphanes ulei            | Leaf rachis Utensils & tools Labour tools                          |
| Wayusentsa | Aiphanes ulei            | Palm heart Human food Food                                         |
| Wayusentsa | Aiphanes ulei            | Palm heart Medicinal & veterinary Blood and Cardio-vascular system |
| Wayusentsa | Aiphanes ulei            | Palm heart Medicinal & veterinary Dental health                    |
| Wayusentsa | Aiphanes ulei            | Spines Medicinal & veterinary Skin and subcutaneous tissue         |
| Wayusentsa | Aphandra natalia         | Entire leaf Construction Thatch                                    |
| Wayusentsa | Aphandra natalia         | Entire leaf Utensils & tools Domestic utensils                     |
| Wayusentsa | Aphandra natalia         | Fruit Animal food Wildlife attractant                              |
| Wayusentsa | Aphandra natalia         | Fruit Cultural Cosmetic                                            |
| Wayusentsa | Aphandra natalia         | Leaf sheath Utensils & tools Domestic utensils                     |
| Wayusentsa | Aphandra natalia         | Palm heart Human food Food                                         |
| Wayusentsa | Aphandra natalia         | Seed Human food Food                                               |
| Wayusentsa | Aphandra natalia         | Spear leaf Utensils & tools Hunting and fishing                    |
| Wayusentsa | Aphandra natalia         | Stem Other Miscellaneous                                           |
| Wayusentsa | Astrocaryum chambira     | Fruit Animal food Wildlife attractant                              |
| Wayusentsa | Astrocaryum chambira     | Palm heart Human food Food                                         |
| Wayusentsa | Astrocaryum chambira     | Seed Human food Food                                               |
| Wayusentsa | Astrocaryum chambira     | Spear leaf Cultural Clothes and accessories                        |
| Wayusentsa | Astrocaryum chambira     | Spear leaf Cultural Personal adornment                             |
| Wayusentsa | Astrocaryum chambira     | Spear leaf Utensils & tools Domestic utensils                      |
| Wayusentsa | Astrocaryum chambira     | Spear leaf Utensils & tools Hunting and fishing                    |
| Wayusentsa | Astrocaryum chambira     | Spear leaf Utensils & tools Rope                                   |
| Wayusentsa | Astrocaryum chambira     | Stem Other Miscellaneous                                           |
| Wayusentsa | Astrocaryum urostachys   | Palm heart Human food Food                                         |
| Wayusentsa | Astrocaryum urostachys   | Seed Human food Food                                               |
| Wayusentsa | Astrocaryum urostachys   | Spear leaf Construction Thatch                                     |
| Wayusentsa | Astrocaryum urostachys   | Spear leaf Cultural Ritual                                         |
| Wayusentsa | Astrocaryum urostachys   | Stem Other Miscellaneous                                           |
| Wayusentsa | Attalea bassleriana      | Entire leaf Construction Thatch                                    |
| Wayusentsa | Attalea bassleriana      | Palm heart Human food Food                                         |
| Wayusentsa | Attalea bassleriana      | Seed Human food Food                                               |
| Wayusentsa | Attalea bassleriana      | Seed Other Miscellaneous                                           |
| Wayusentsa | Attalea bassleriana      | Stem Other Miscellaneous                                           |
| Wayusentsa | Attalea maripa           | Fruit Human food Food                                              |
| Wayusentsa | Attalea maripa           | Fruit Utensils & tools Labour tools                                |
| Wayusentsa | Attalea maripa           | Palm heart Human food Food                                         |
| Wayusentsa | Attalea maripa           | Petiole Utensils & tools Domestic utensils                         |
| Wayusentsa | Attalea maripa           | Petiole Utensils & tools Hunting and fishing                       |
| Wayusentsa | Attalea maripa           | Seed Human food Food                                               |
| Wayusentsa | Attalea maripa           | Seed Other Miscellaneous                                           |
| Wayusentsa | Attalea maripa           | Stem Other Miscellaneous                                           |
| Wayusentsa | Bactris concinna         | Seed Human food Food                                               |
| Wayusentsa | Bactris concinna         | Stem Utensils & tools Hunting and fishing                          |
| Wayusentsa | Bactris corossilla       | Leaf rachis Utensils & tools Labour tools                          |
| Wayusentsa | Bactris corossilla       | Palm heart Medicinal & veterinary Blood and Cardio-vascular system |
| Wayusentsa | Bactris corossilla       | Seed Human food Food                                               |
| Wayusentsa | Bactris corossilla       | Stem Construction Thatch                                           |
| Wayusentsa | Bactris corossilla       | Stem Cultural Recreational                                         |
| Wayusentsa | Bactris corossilla       | Stem Utensils & tools Domestic utensils                            |
| Wayusentsa | Bactris maraja           | Palm heart Medicinal & veterinary Blood and Cardio-vascular system |
| Wayusentsa | Bactris maraja           | Seed Human food Food                                               |
| Wayusentsa | Bactris maraja           | Stem Construction Thatch                                           |
| Wayusentsa | Bactris maraja           | Stem Cultural Recreational                                         |
| Wayusentsa | Bactris maraja           | Stem Utensils & tools Domestic utensils                            |
| Wayusentsa | Chamaedorea pauciflora   | Flower Cultural Cosmetic                                           |
| Wayusentsa | Elaeis oleifera          | Fruit Human food Oils                                              |
| Wayusentsa | Elaeis oleifera          | Petiole Utensils & tools Hunting and fishing                       |
| Wayusentsa | Elaeis oleifera          | Seed Human food Food                                               |
| Wayusentsa | Euterpe precatoria       | Fruit Cultural Cosmetic                                            |
| Wayusentsa | Euterpe precatoria       | Fruit Human food Beverages                                         |
| Wayusentsa | Euterpe precatoria       | Fruit Human food Food                                              |
| Wayusentsa | Euterpe precatoria       | Fruit Human food Oils                                              |
| Wayusentsa | Euterpe precatoria       | Palm heart Human food Food                                         |
| Wayusentsa | Euterpe precatoria       | Root Cultural Cosmetic                                             |
| Wayusentsa | Euterpe precatoria       | Stem Construction Houses                                           |
| Wayusentsa | Euterpe precatoria       | Stem Other Miscellaneous                                           |
| Wayusentsa | Geonoma deversa          | Entire leaf Construction Thatch                                    |
| Wayusentsa | Geonoma longepedunculata | Entire leaf Construction Thatch                                    |
| Wayusentsa | Geonoma macrostachys     | Entire leaf Construction Thatch                                    |
| Wayusentsa | Geonoma stricta          | Entire leaf Construction Thatch                                    |
| Wayusentsa | Hyospathe elegans        | Entire leaf Construction Thatch                                    |
| Wayusentsa | Hyospathe elegans        | Root Utensils & tools Domestic utensils                            |

|            |                           |                                                                    |
|------------|---------------------------|--------------------------------------------------------------------|
| Wayusentsa | Iriarteia deltoidea       | Entire leaf Construction Thatch                                    |
| Wayusentsa | Iriarteia deltoidea       | Palm heart Human food Food                                         |
| Wayusentsa | Iriarteia deltoidea       | Seed Human food Food                                               |
| Wayusentsa | Iriarteia deltoidea       | Spear leaf Utensils & tools Wrappers                               |
| Wayusentsa | Iriarteia deltoidea       | Stem Construction Houses                                           |
| Wayusentsa | Iriarteia deltoidea       | Stem Construction Thatch                                           |
| Wayusentsa | Iriarteia deltoidea       | Stem Cultural Ritual                                               |
| Wayusentsa | Iriarteia deltoidea       | Stem Other Miscellaneous                                           |
| Wayusentsa | Iriarteia deltoidea       | Stem Utensils & tools Domestic utensils                            |
| Wayusentsa | Iriarteia deltoidea       | Stem Utensils & tools Hunting and fishing                          |
| Wayusentsa | Iriarteia deltoidea       | Stem Utensils & tools Labour tools                                 |
| Wayusentsa | Mauritia flexuosa         | Fruit Cultural Cosmetic                                            |
| Wayusentsa | Mauritia flexuosa         | Fruit Human food Beverages                                         |
| Wayusentsa | Mauritia flexuosa         | Fruit Human food Food                                              |
| Wayusentsa | Mauritia flexuosa         | Fruit Human food Oils                                              |
| Wayusentsa | Mauritia flexuosa         | Fruit Utensils & tools Hunting and fishing                         |
| Wayusentsa | Mauritia flexuosa         | Leaf rachis Utensils & tools Domestic utensils                     |
| Wayusentsa | Mauritia flexuosa         | Palm heart Human food Food                                         |
| Wayusentsa | Mauritia flexuosa         | Stem Construction Houses                                           |
| Wayusentsa | Mauritia flexuosa         | Stem Other Miscellaneous                                           |
| Wayusentsa | Oenocarpus bataua         | Entire leaf Construction Thatch                                    |
| Wayusentsa | Oenocarpus bataua         | Entire leaf Cultural Ritual                                        |
| Wayusentsa | Oenocarpus bataua         | Entire leaf Utensils & tools Domestic utensils                     |
| Wayusentsa | Oenocarpus bataua         | Fruit Cultural Cosmetic                                            |
| Wayusentsa | Oenocarpus bataua         | Fruit Human food Beverages                                         |
| Wayusentsa | Oenocarpus bataua         | Fruit Human food Food                                              |
| Wayusentsa | Oenocarpus bataua         | Fruit Human food Oils                                              |
| Wayusentsa | Oenocarpus bataua         | Leaf sheath Cultural Personal adornment                            |
| Wayusentsa | Oenocarpus bataua         | Palm heart Human food Food                                         |
| Wayusentsa | Oenocarpus bataua         | Spear leaf Utensils & tools Domestic utensils                      |
| Wayusentsa | Oenocarpus bataua         | Stem Other Miscellaneous                                           |
| Wayusentsa | Oenocarpus mapora         | Fruit Human food Beverages                                         |
| Wayusentsa | Oenocarpus mapora         | Fruit Human food Food                                              |
| Wayusentsa | Oenocarpus mapora         | Leaf rachis Utensils & tools Labour tools                          |
| Wayusentsa | Oenocarpus mapora         | Palm heart Human food Food                                         |
| Wayusentsa | Oenocarpus mapora         | Stem Construction Houses                                           |
| Wayusentsa | Pholidostachys synanthera | Entire leaf Construction Thatch                                    |
| Wayusentsa | Phytelephas tenuicaulis   | Entire leaf Construction Thatch                                    |
| Wayusentsa | Phytelephas tenuicaulis   | Palm heart Human food Food                                         |
| Wayusentsa | Phytelephas tenuicaulis   | Seed Human food Food                                               |
| Wayusentsa | Phytelephas tenuicaulis   | Seed Utensils & tools Other                                        |
| Wayusentsa | Phytelephas tenuicaulis   | Stem Other Miscellaneous                                           |
| Wayusentsa | Socratea exorrhiza        | Entire leaf Construction Thatch                                    |
| Wayusentsa | Socratea exorrhiza        | Root Utensils & tools Domestic utensils                            |
| Wayusentsa | Socratea exorrhiza        | Seed Cultural Personal adornment                                   |
| Wayusentsa | Socratea exorrhiza        | Stem Construction Houses                                           |
| Wayusentsa | Socratea exorrhiza        | Stem Construction Thatch                                           |
| Wayusentsa | Socratea exorrhiza        | Stem Other Miscellaneous                                           |
| Wayusentsa | Socratea exorrhiza        | Stem Utensils & tools Hunting and fishing                          |
| Villanueva | Asterogyne martiana       | Entire leaf Construction Thatch                                    |
| Villanueva | Asterogyne martiana       | Fruit Human food Beverages                                         |
| Villanueva | Asterogyne martiana       | Seed Human food Food                                               |
| Villanueva | Astrocaryum standleyanum  | Fruit Animal food Fodder                                           |
| Villanueva | Astrocaryum standleyanum  | Fruit Animal food Wildlife attractant                              |
| Villanueva | Astrocaryum standleyanum  | Fruit Human food Beverages                                         |
| Villanueva | Astrocaryum standleyanum  | Fruit Human food Food                                              |
| Villanueva | Astrocaryum standleyanum  | Palm heart Human food Food                                         |
| Villanueva | Astrocaryum standleyanum  | Seed Human food Food                                               |
| Villanueva | Astrocaryum standleyanum  | Spear leaf Cultural Clothes and accessories                        |
| Villanueva | Astrocaryum standleyanum  | Spear leaf Cultural Ritual                                         |
| Villanueva | Astrocaryum standleyanum  | Spear leaf Utensils & tools Domestic utensils                      |
| Villanueva | Astrocaryum standleyanum  | Stem Construction Houses                                           |
| Villanueva | Astrocaryum standleyanum  | Stem Fuel Firewood                                                 |
| Villanueva | Astrocaryum standleyanum  | Stem Utensils & tools Hunting and fishing                          |
| Villanueva | Astrocaryum standleyanum  | Stem Utensils & tools Labour tools                                 |
| Villanueva | Attalea allenii           | Entire leaf Construction Thatch                                    |
| Villanueva | Attalea allenii           | Entire leaf Cultural Ritual                                        |
| Villanueva | Attalea allenii           | Entire leaf Medicinal & veterinary Cultural diseases and disorders |
| Villanueva | Attalea allenii           | Fruit Cultural Personal adornment                                  |
| Villanueva | Attalea allenii           | Fruit Human food Oils                                              |
| Villanueva | Attalea allenii           | Seed Human food Beverages                                          |
| Villanueva | Attalea allenii           | Seed Human food Food                                               |
| Villanueva | Attalea allenii           | Seed Other Miscellaneous                                           |
| Villanueva | Attalea allenii           | Spear leaf Cultural Ritual                                         |
| Villanueva | Attalea allenii           | Spear leaf Environmental Ornamental                                |
| Villanueva | Attalea allenii           | Spear leaf Medicinal & veterinary Cultural diseases and disorders  |
| Villanueva | Attalea cuatrecasana      | Entire leaf Construction Thatch                                    |
| Villanueva | Attalea cuatrecasana      | Fruit Cultural Personal adornment                                  |
| Villanueva | Attalea cuatrecasana      | Fruit Human food Oils                                              |
| Villanueva | Attalea cuatrecasana      | Seed Human food Beverages                                          |
| Villanueva | Attalea cuatrecasana      | Seed Human food Food                                               |
| Villanueva | Attalea cuatrecasana      | Spear leaf Cultural Ritual                                         |
| Villanueva | Bactris barronis          | Fruit Animal food Fodder                                           |
| Villanueva | Bactris barronis          | Fruit Human food Beverages                                         |
| Villanueva | Bactris barronis          | Fruit Human food Food                                              |
| Villanueva | Bactris barronis          | Palm heart Human food Food                                         |
| Villanueva | Bactris barronis          | Seed Human food Food                                               |



|            |                         |                                                               |
|------------|-------------------------|---------------------------------------------------------------|
| Villanueva | Bactris barronis        | Spines Medicinal & veterinary Skin and subcutaneous tissue    |
| Villanueva | Bactris barronis        | Stem Construction Houses                                      |
| Villanueva | Bactris barronis        | Stem Utensils & tools Hunting and fishing                     |
| Villanueva | Bactris coloniata       | Fruit Human food Beverages                                    |
| Villanueva | Bactris coloniata       | Fruit Human food Food                                         |
| Villanueva | Bactris coloniata       | Seed Human food Beverages                                     |
| Villanueva | Bactris coloniata       | Seed Human food Food                                          |
| Villanueva | Bactris coloniata       | Stem Utensils & tools Hunting and fishing                     |
| Villanueva | Bactris coloradonis     | Fruit Human food Beverages                                    |
| Villanueva | Bactris coloradonis     | Fruit Human food Food                                         |
| Villanueva | Bactris coloradonis     | Fruit Human food Oils                                         |
| Villanueva | Bactris coloradonis     | Seed Human food Food                                          |
| Villanueva | Bactris coloradonis     | Stem Utensils & tools Hunting and fishing                     |
| Villanueva | Bactris coloradonis     | Stem Utensils & tools Labour tools                            |
| Villanueva | Bactris maraja          | Fruit Human food Food                                         |
| Villanueva | Bactris maraja          | Seed Human food Food                                          |
| Villanueva | Desmoncus cirrhiferus   | Seed Human food Food                                          |
| Villanueva | Desmoncus cirrhiferus   | Stem Construction Thatch                                      |
| Villanueva | Desmoncus cirrhiferus   | Stem Utensils & tools Domestic utensils                       |
| Villanueva | Desmoncus cirrhiferus   | Stem Utensils & tools Hunting and fishing                     |
| Villanueva | Desmoncus cirrhiferus   | Stem Utensils & tools Rope                                    |
| Villanueva | Euterpe oleracea        | Fruit Human food Beverages                                    |
| Villanueva | Euterpe oleracea        | Fruit Human food Food                                         |
| Villanueva | Euterpe oleracea        | Inflorescence Cultural Recreational                           |
| Villanueva | Euterpe oleracea        | Palm heart Human food Food                                    |
| Villanueva | Euterpe oleracea        | Stem Construction Houses                                      |
| Villanueva | Euterpe oleracea        | Stem Construction Thatch                                      |
| Villanueva | Euterpe oleracea        | Stem Environmental Fences                                     |
| Villanueva | Euterpe oleracea        | Stem Utensils & tools Domestic utensils                       |
| Villanueva | Geonoma calyptrognoidea | Entire leaf Construction Thatch                               |
| Villanueva | Geonoma calyptrognoidea | Seed Human food Food                                          |
| Villanueva | Geonoma cuneata         | Entire leaf Construction Thatch                               |
| Villanueva | Geonoma deversa         | Entire leaf Construction Thatch                               |
| Villanueva | Geonoma deversa         | Stem Utensils & tools Hunting and fishing                     |
| Villanueva | Iriartea deltoidea      | Bract Utensils & tools Wrappers                               |
| Villanueva | Iriartea deltoidea      | Fruit Human food Food                                         |
| Villanueva | Iriartea deltoidea      | Inflorescence Cultural Recreational                           |
| Villanueva | Iriartea deltoidea      | Palm heart Human food Food                                    |
| Villanueva | Iriartea deltoidea      | Root Cultural Ritual                                          |
| Villanueva | Iriartea deltoidea      | Root Utensils & tools Domestic utensils                       |
| Villanueva | Iriartea deltoidea      | Seed Human food Food                                          |
| Villanueva | Iriartea deltoidea      | Stem Construction Houses                                      |
| Villanueva | Iriartea deltoidea      | Stem Construction Thatch                                      |
| Villanueva | Iriartea deltoidea      | Stem Construction Transportation                              |
| Villanueva | Iriartea deltoidea      | Stem Cultural Recreational                                    |
| Villanueva | Iriartea deltoidea      | Stem Cultural Ritual                                          |
| Villanueva | Iriartea deltoidea      | Stem Other Miscellaneous                                      |
| Villanueva | Iriartea deltoidea      | Stem Utensils & tools Domestic utensils                       |
| Villanueva | Iriartea deltoidea      | Stem Utensils & tools Hunting and fishing                     |
| Villanueva | Manicaria saccifera     | Bract Cultural Clothes and accessories                        |
| Villanueva | Manicaria saccifera     | Bract Medicinal & veterinary Blood and Cardio-vascular system |
| Villanueva | Manicaria saccifera     | Bract Utensils & tools Domestic utensils                      |
| Villanueva | Manicaria saccifera     | Bract Utensils & tools Labour tools                           |
| Villanueva | Manicaria saccifera     | Bract Utensils & tools Other                                  |
| Villanueva | Manicaria saccifera     | Bract Utensils & tools Wrappers                               |
| Villanueva | Manicaria saccifera     | Entire leaf Construction Thatch                               |
| Villanueva | Manicaria saccifera     | Seed Human food Beverages                                     |
| Villanueva | Manicaria saccifera     | Seed Human food Food                                          |
| Villanueva | Manicaria saccifera     | Seed Medicinal & veterinary Respiratory system                |
| Villanueva | Mauritiella macroclada  | Entire leaf Construction Thatch                               |
| Villanueva | Mauritiella macroclada  | Stem Construction Houses                                      |
| Villanueva | Oenocarpus bataua       | Entire leaf Construction Thatch                               |
| Villanueva | Oenocarpus bataua       | Fruit Cultural Cosmetic                                       |
| Villanueva | Oenocarpus bataua       | Fruit Human food Beverages                                    |
| Villanueva | Oenocarpus bataua       | Fruit Human food Food                                         |
| Villanueva | Oenocarpus bataua       | Fruit Human food Oils                                         |
| Villanueva | Oenocarpus bataua       | Inflorescence Cultural Recreational                           |
| Villanueva | Oenocarpus bataua       | Palm heart Human food Food                                    |
| Villanueva | Oenocarpus bataua       | Stem Construction Bridges                                     |
| Villanueva | Oenocarpus bataua       | Stem Construction Houses                                      |
| Villanueva | Oenocarpus bataua       | Stem Fuel Firewood                                            |
| Villanueva | Oenocarpus mapora       | Entire leaf Construction Thatch                               |
| Villanueva | Oenocarpus mapora       | Entire leaf Cultural Ritual                                   |
| Villanueva | Oenocarpus mapora       | Fruit Human food Beverages                                    |
| Villanueva | Oenocarpus mapora       | Fruit Human food Food                                         |
| Villanueva | Oenocarpus mapora       | Fruit Human food Oils                                         |
| Villanueva | Oenocarpus mapora       | Inflorescence Cultural Recreational                           |
| Villanueva | Oenocarpus mapora       | Petiole Utensils & tools Domestic utensils                    |
| Villanueva | Oenocarpus mapora       | Spear leaf Cultural Ritual                                    |
| Villanueva | Oenocarpus mapora       | Stem Construction Houses                                      |
| Villanueva | Oenocarpus mapora       | Stem Construction Thatch                                      |
| Villanueva | Prestoea decurrens      | Entire leaf Construction Thatch                               |
| Villanueva | Prestoea decurrens      | Fruit Human food Beverages                                    |
| Villanueva | Prestoea decurrens      | Fruit Human food Food                                         |
| Villanueva | Prestoea decurrens      | Inflorescence Cultural Recreational                           |
| Villanueva | Prestoea decurrens      | Stem Construction Houses                                      |
| Villanueva | Prestoea decurrens      | Stem Construction Thatch                                      |

|                |                              |                                                                        |
|----------------|------------------------------|------------------------------------------------------------------------|
| Villanueva     | Prestoea decurrens           | Stem Utensils & tools Domestic utensils                                |
| Villanueva     | Socratea exorrhiza           | Root Construction Houses                                               |
| Villanueva     | Socratea exorrhiza           | Root Utensils & tools Domestic utensils                                |
| Villanueva     | Socratea exorrhiza           | Seed Human food Food                                                   |
| Villanueva     | Socratea exorrhiza           | Stem Construction Houses                                               |
| Villanueva     | Socratea exorrhiza           | Stem Utensils & tools Domestic utensils                                |
| Villanueva     | Socratea exorrhiza           | Stem Utensils & tools Hunting and fishing                              |
| Villanueva     | Synechanthus warscewiczianus | Fruit Animal food Wildlife attractant                                  |
| Villanueva     | Welfia regia                 | Entire leaf Construction Thatch                                        |
| Villanueva     | Welfia regia                 | Fruit Human food Food                                                  |
| Villanueva     | Welfia regia                 | Seed Human food Food                                                   |
| Villanueva     | Welfia regia                 | Spear leaf Cultural Clothes and accessories                            |
| Villanueva     | Welfia regia                 | Spear leaf Utensils & tools Domestic utensils                          |
| Villanueva     | Welfia regia                 | Spear leaf Utensils & tools Rope                                       |
| Villanueva     | Welfia regia                 | Stem Construction Bridges                                              |
| Villanueva     | Welfia regia                 | Stem Construction Houses                                               |
| Villanueva     | Welfia regia                 | Stem Fuel Firewood                                                     |
| Villanueva     | Wettinia quinaria            | Entire leaf Construction Thatch                                        |
| Villanueva     | Wettinia quinaria            | Fruit Animal food Wildlife attractant                                  |
| Villanueva     | Wettinia quinaria            | Fruit Human food Food                                                  |
| Villanueva     | Wettinia quinaria            | Seed Human food Food                                                   |
| Villanueva     | Wettinia quinaria            | Stem Construction Houses                                               |
| Villanueva     | Wettinia quinaria            | Stem Construction Thatch                                               |
| Villanueva     | Wettinia quinaria            | Stem Fuel Firewood                                                     |
| Villanueva     | Wettinia quinaria            | Stem Utensils & tools Domestic utensils                                |
| Villanueva     | Wettinia quinaria            | Stem Utensils & tools Hunting and fishing                              |
| Villa Santiago | Aiphanes horrida             | Fruit Human food Food                                                  |
| Villa Santiago | Astrocaryum gratum           | Entire leaf Construction Thatch                                        |
| Villa Santiago | Astrocaryum gratum           | Entire plant Environmental Agroforestry                                |
| Villa Santiago | Astrocaryum gratum           | Fruit Animal food Fodder                                               |
| Villa Santiago | Astrocaryum gratum           | Fruit Human food Beverages                                             |
| Villa Santiago | Astrocaryum gratum           | Fruit Human food Food                                                  |
| Villa Santiago | Astrocaryum gratum           | Palm heart Human food Food                                             |
| Villa Santiago | Astrocaryum gratum           | Seed Human food Food                                                   |
| Villa Santiago | Astrocaryum gratum           | Spines Cultural Ritual                                                 |
| Villa Santiago | Astrocaryum gratum           | Spines Utensils & tools Hunting and fishing                            |
| Villa Santiago | Astrocaryum gratum           | Stem Construction Houses                                               |
| Villa Santiago | Astrocaryum gratum           | Stem Other Miscellaneous                                               |
| Villa Santiago | Attalea maripa               | Entire leaf Construction Thatch                                        |
| Villa Santiago | Attalea maripa               | Fruit Cultural Personal adornment                                      |
| Villa Santiago | Attalea maripa               | Fruit Human food Food                                                  |
| Villa Santiago | Attalea maripa               | Seed Cultural Cosmetic                                                 |
| Villa Santiago | Attalea maripa               | Seed Human food Oils                                                   |
| Villa Santiago | Attalea maripa               | Seed Other Miscellaneous                                               |
| Villa Santiago | Attalea maripa               | Stem Other Miscellaneous                                               |
| Villa Santiago | Bactris concinna             | Fruit Human food Food                                                  |
| Villa Santiago | Chamaedorea angustisecta     | Flower Cultural Cosmetic                                               |
| Villa Santiago | Chelyocarpus ulei            | Entire leaf Construction Thatch                                        |
| Villa Santiago | Chelyocarpus ulei            | Petiole Utensils & tools Domestic utensils                             |
| Villa Santiago | Chelyocarpus ulei            | Spear leaf Cultural Clothes and accessories                            |
| Villa Santiago | Chelyocarpus ulei            | Spear leaf Utensils & tools Domestic utensils                          |
| Villa Santiago | Chelyocarpus ulei            | Spear leaf Utensils & tools Hunting and fishing                        |
| Villa Santiago | Desmoncus mitis              | Fruit Human food Food                                                  |
| Villa Santiago | Euterpe precatoria           | Entire leaf Construction Thatch                                        |
| Villa Santiago | Euterpe precatoria           | Flower Cultural Dyes                                                   |
| Villa Santiago | Euterpe precatoria           | Fruit Human food Beverages                                             |
| Villa Santiago | Euterpe precatoria           | Fruit Human food Food                                                  |
| Villa Santiago | Euterpe precatoria           | Fruit Medicinal & veterinary General Ailments with Unspecific Symptoms |
| Villa Santiago | Euterpe precatoria           | Infrutescence Utensils & tools Domestic utensils                       |
| Villa Santiago | Euterpe precatoria           | Leaf rachis Utensils & tools Domestic utensils                         |
| Villa Santiago | Euterpe precatoria           | Palm heart Human food Food                                             |
| Villa Santiago | Euterpe precatoria           | Root Medicinal & veterinary Blood and Cardio-vascular system           |
| Villa Santiago | Euterpe precatoria           | Root Medicinal & veterinary Digestive system                           |
| Villa Santiago | Euterpe precatoria           | Root Medicinal & veterinary Reproductive system and sex health         |
| Villa Santiago | Euterpe precatoria           | Root Medicinal & veterinary Urinary system                             |
| Villa Santiago | Euterpe precatoria           | Seed Cultural Personal adornment                                       |
| Villa Santiago | Euterpe precatoria           | Spear leaf Utensils & tools Domestic utensils                          |
| Villa Santiago | Euterpe precatoria           | Stem Construction Houses                                               |
| Villa Santiago | Euterpe precatoria           | Stem Utensils & tools Hunting and fishing                              |
| Villa Santiago | Geonoma deversa              | Entire leaf Construction Thatch                                        |
| Villa Santiago | Hyospathe elegans            | Entire leaf Construction Thatch                                        |
| Villa Santiago | Iriarteia deltoidea          | Bract Utensils & tools Domestic utensils                               |
| Villa Santiago | Iriarteia deltoidea          | Entire leaf Construction Thatch                                        |
| Villa Santiago | Iriarteia deltoidea          | Fruit Human food Food                                                  |
| Villa Santiago | Iriarteia deltoidea          | Leaf rachis Construction Thatch                                        |
| Villa Santiago | Iriarteia deltoidea          | Palm heart Human food Food                                             |
| Villa Santiago | Iriarteia deltoidea          | Seed Cultural Personal adornment                                       |
| Villa Santiago | Iriarteia deltoidea          | Stem Construction Houses                                               |
| Villa Santiago | Iriarteia deltoidea          | Stem Construction Other                                                |
| Villa Santiago | Iriarteia deltoidea          | Stem Other Miscellaneous                                               |
| Villa Santiago | Iriarteia deltoidea          | Stem Utensils & tools Domestic utensils                                |
| Villa Santiago | Iriarteia deltoidea          | Stem Utensils & tools Hunting and fishing                              |
| Villa Santiago | Mauritia flexuosa            | Entire leaf Construction Thatch                                        |
| Villa Santiago | Mauritia flexuosa            | Fruit Cultural Cosmetic                                                |
| Villa Santiago | Mauritia flexuosa            | Fruit Human food Beverages                                             |
| Villa Santiago | Mauritia flexuosa            | Fruit Human food Food                                                  |
| Villa Santiago | Mauritia flexuosa            | Petiole Construction Houses                                            |

|                |                          |                                                 |
|----------------|--------------------------|-------------------------------------------------|
| Villa Santiago | Mauritia flexuosa        | Spear leaf Cultural Clothes and accessories     |
| Villa Santiago | Mauritia flexuosa        | Spear leaf Utensils & tools Domestic utensils   |
| Villa Santiago | Mauritia flexuosa        | Stem Construction Houses                        |
| Villa Santiago | Mauritia flexuosa        | Stem Other Miscellaneous                        |
| Villa Santiago | Oenocarpus bataua        | Entire leaf Construction Thatch                 |
| Villa Santiago | Oenocarpus bataua        | Fruit Cultural Cosmetic                         |
| Villa Santiago | Oenocarpus bataua        | Fruit Human food Beverages                      |
| Villa Santiago | Oenocarpus bataua        | Fruit Human food Food                           |
| Villa Santiago | Oenocarpus bataua        | Fruit Human food Oils                           |
| Villa Santiago | Oenocarpus bataua        | Fruit Medicinal & veterinary Respiratory system |
| Villa Santiago | Oenocarpus bataua        | Spear leaf Utensils & tools Domestic utensils   |
| Villa Santiago | Oenocarpus bataua        | Stem Construction Houses                        |
| Villa Santiago | Oenocarpus bataua        | Stem Other Miscellaneous                        |
| Villa Santiago | Oenocarpus bataua        | Stem Utensils & tools Hunting and fishing       |
| Villa Santiago | Oenocarpus mapora        | Entire leaf Construction Thatch                 |
| Villa Santiago | Oenocarpus mapora        | Fruit Cultural Cosmetic                         |
| Villa Santiago | Oenocarpus mapora        | Fruit Human food Beverages                      |
| Villa Santiago | Oenocarpus mapora        | Fruit Human food Food                           |
| Villa Santiago | Oenocarpus mapora        | Stem Construction Houses                        |
| Villa Santiago | Oenocarpus mapora        | Stem Other Miscellaneous                        |
| Villa Santiago | Phytelephas macrocarpa   | Entire leaf Construction Thatch                 |
| Villa Santiago | Phytelephas macrocarpa   | Fruit Human food Food                           |
| Villa Santiago | Phytelephas macrocarpa   | Petiole Construction Houses                     |
| Villa Santiago | Phytelephas macrocarpa   | Seed Cultural Personal adornment                |
| Villa Santiago | Phytelephas macrocarpa   | Seed Human food Food                            |
| Villa Santiago | Socratea exorrhiza       | Entire leaf Construction Thatch                 |
| Villa Santiago | Socratea exorrhiza       | Palm heart Human food Food                      |
| Villa Santiago | Socratea exorrhiza       | Palm heart Utensils & tools Other               |
| Villa Santiago | Socratea exorrhiza       | Petiole Construction Thatch                     |
| Villa Santiago | Socratea exorrhiza       | Root Utensils & tools Domestic utensils         |
| Villa Santiago | Socratea exorrhiza       | Seed Cultural Personal adornment                |
| Villa Santiago | Socratea exorrhiza       | Stem Construction Houses                        |
| Villa Santiago | Socratea exorrhiza       | Stem Construction Other                         |
| Villa Santiago | Wettinia augusta         | Entire leaf Construction Thatch                 |
| Villa Santiago | Wettinia augusta         | Fruit Human food Food                           |
| Villa Santiago | Wettinia augusta         | Palm heart Human food Food                      |
| Villa Santiago | Wettinia augusta         | Seed Human food Food                            |
| Villa Santiago | Wettinia augusta         | Stem Construction Houses                        |
| Villa Santiago | Wettinia augusta         | Stem Utensils & tools Domestic utensils         |
| Union Progreso | Astrocaryum gratum       | Entire leaf Construction Thatch                 |
| Union Progreso | Astrocaryum gratum       | Fruit Cultural Personal adornment               |
| Union Progreso | Attalea bassleriana      | Entire leaf Construction Thatch                 |
| Union Progreso | Attalea bassleriana      | Fruit Cultural Personal adornment               |
| Union Progreso | Attalea maripa           | Entire leaf Construction Thatch                 |
| Union Progreso | Attalea maripa           | Fruit Cultural Personal adornment               |
| Union Progreso | Attalea maripa           | Fruit Human food Food                           |
| Union Progreso | Attalea maripa           | Palm heart Human food Food                      |
| Union Progreso | Attalea maripa           | Stem Other Miscellaneous                        |
| Union Progreso | Attalea princeps         | Entire leaf Construction Thatch                 |
| Union Progreso | Attalea princeps         | Fruit Cultural Personal adornment               |
| Union Progreso | Attalea princeps         | Fruit Human food Food                           |
| Union Progreso | Attalea princeps         | Palm heart Human food Food                      |
| Union Progreso | Attalea princeps         | Seed Human food Food                            |
| Union Progreso | Attalea princeps         | Stem Other Miscellaneous                        |
| Union Progreso | Chamaedorea angustisecta | Entire plant Environmental Ornamental           |
| Union Progreso | Chelyocarpus ulei        | Entire plant Environmental Ornamental           |
| Union Progreso | Euterpe precatoria       | Entire leaf Construction Thatch                 |
| Union Progreso | Euterpe precatoria       | Fruit Human food Beverages                      |
| Union Progreso | Euterpe precatoria       | Fruit Human food Food                           |
| Union Progreso | Euterpe precatoria       | Palm heart Human food Food                      |
| Union Progreso | Euterpe precatoria       | Root Medicinal & veterinary Digestive system    |
| Union Progreso | Euterpe precatoria       | Root Medicinal & veterinary Urinary system      |
| Union Progreso | Euterpe precatoria       | Stem Construction Houses                        |
| Union Progreso | Geonoma deversa          | Entire leaf Construction Thatch                 |
| Union Progreso | Iriartea deltoidea       | Entire leaf Construction Thatch                 |
| Union Progreso | Iriartea deltoidea       | Palm heart Human food Food                      |
| Union Progreso | Iriartea deltoidea       | Petiole Construction Thatch                     |
| Union Progreso | Iriartea deltoidea       | Stem Construction Houses                        |
| Union Progreso | Mauritia flexuosa        | Entire leaf Construction Thatch                 |
| Union Progreso | Mauritia flexuosa        | Fruit Human food Beverages                      |
| Union Progreso | Mauritia flexuosa        | Fruit Human food Food                           |
| Union Progreso | Mauritia flexuosa        | Seed Cultural Other                             |
| Union Progreso | Mauritia flexuosa        | Stem Other Miscellaneous                        |
| Union Progreso | Oenocarpus bataua        | Entire leaf Construction Thatch                 |
| Union Progreso | Oenocarpus bataua        | Fruit Cultural Cosmetic                         |
| Union Progreso | Oenocarpus bataua        | Fruit Human food Beverages                      |
| Union Progreso | Oenocarpus bataua        | Fruit Human food Food                           |
| Union Progreso | Oenocarpus bataua        | Fruit Human food Oils                           |
| Union Progreso | Oenocarpus bataua        | Stem Construction Houses                        |
| Union Progreso | Oenocarpus bataua        | Stem Other Miscellaneous                        |
| Union Progreso | Oenocarpus mapora        | Fruit Human food Beverages                      |
| Union Progreso | Oenocarpus mapora        | Fruit Human food Food                           |
| Union Progreso | Phytelephas macrocarpa   | Seed Cultural Personal adornment                |
| Union Progreso | Phytelephas macrocarpa   | Seed Human food Food                            |
| Union Progreso | Socratea exorrhiza       | Entire leaf Construction Thatch                 |
| Union Progreso | Socratea exorrhiza       | Petiole Construction Thatch                     |
| Union Progreso | Socratea exorrhiza       | Seed Cultural Personal adornment                |

|                        |                          |                                                              |
|------------------------|--------------------------|--------------------------------------------------------------|
| Union Progreso         | Wettinia augusta         | Entire leaf Construction Thatch                              |
| Union Progreso         | Wettinia augusta         | Leaf rachis Construction Thatch                              |
| Tres Arroyos           | Aiphanes horrida         | Seed Human food Food                                         |
| Tres Arroyos           | Bactris concinna         | Fruit Human food Food                                        |
| Tres Arroyos           | Bactris concinna         | Stem Construction Thatch                                     |
| Tres Arroyos           | Bactris concinna         | Stem Utensils & tools Hunting and fishing                    |
| Tres Arroyos           | Euterpe precatoria       | Entire leaf Construction Thatch                              |
| Tres Arroyos           | Euterpe precatoria       | Fruit Human food Beverages                                   |
| Tres Arroyos           | Euterpe precatoria       | Fruit Human food Food                                        |
| Tres Arroyos           | Euterpe precatoria       | Infrutescence Utensils & tools Domestic utensils             |
| Tres Arroyos           | Euterpe precatoria       | Palm heart Human food Food                                   |
| Tres Arroyos           | Euterpe precatoria       | Root Medicinal & veterinary Blood and Cardio-vascular system |
| Tres Arroyos           | Euterpe precatoria       | Stem Construction Houses                                     |
| Tres Arroyos           | Geonoma deversa          | Entire leaf Construction Thatch                              |
| Tres Arroyos           | Geonoma deversa          | Stem Construction Thatch                                     |
| Tres Arroyos           | Iriarteia deltoidea      | Palm heart Human food Food                                   |
| Tres Arroyos           | Iriarteia deltoidea      | Seed Cultural Personal adornment                             |
| Tres Arroyos           | Iriarteia deltoidea      | Stem Construction Houses                                     |
| Tres Arroyos           | Iriarteia deltoidea      | Stem Other Miscellaneous                                     |
| Tres Arroyos           | Iriarteia deltoidea      | Stem Utensils & tools Domestic utensils                      |
| Tres Arroyos           | Mauritia flexuosa        | Entire leaf Construction Thatch                              |
| Tres Arroyos           | Mauritia flexuosa        | Fruit Human food Beverages                                   |
| Tres Arroyos           | Mauritia flexuosa        | Fruit Human food Food                                        |
| Tres Arroyos           | Mauritia flexuosa        | Stem Other Miscellaneous                                     |
| Tres Arroyos           | Oenocarpus bataua        | Entire leaf Construction Thatch                              |
| Tres Arroyos           | Oenocarpus bataua        | Fruit Cultural Cosmetic                                      |
| Tres Arroyos           | Oenocarpus bataua        | Fruit Human food Beverages                                   |
| Tres Arroyos           | Oenocarpus bataua        | Fruit Human food Food                                        |
| Tres Arroyos           | Oenocarpus bataua        | Fruit Human food Oils                                        |
| Tres Arroyos           | Oenocarpus bataua        | Fruit Medicinal & veterinary Digestive system                |
| Tres Arroyos           | Oenocarpus bataua        | Fruit Medicinal & veterinary Musculo-skeletal system         |
| Tres Arroyos           | Oenocarpus bataua        | Leaf rachis Construction Thatch                              |
| Tres Arroyos           | Oenocarpus bataua        | Stem Construction Thatch                                     |
| Tres Arroyos           | Oenocarpus bataua        | Stem Other Miscellaneous                                     |
| Tres Arroyos           | Oenocarpus mapora        | Entire leaf Construction Thatch                              |
| Tres Arroyos           | Oenocarpus mapora        | Fruit Cultural Cosmetic                                      |
| Tres Arroyos           | Oenocarpus mapora        | Fruit Human food Beverages                                   |
| Tres Arroyos           | Oenocarpus mapora        | Stem Utensils & tools Labour tools                           |
| Tres Arroyos           | Phytelephas macrocarpa   | Entire leaf Construction Thatch                              |
| Tres Arroyos           | Phytelephas macrocarpa   | Fruit Human food Food                                        |
| Tres Arroyos           | Phytelephas macrocarpa   | Seed Cultural Clothes and accessories                        |
| Tres Arroyos           | Phytelephas macrocarpa   | Seed Human food Food                                         |
| Tres Arroyos           | Socratea exorrhiza       | Root Utensils & tools Domestic utensils                      |
| Tres Arroyos           | Socratea exorrhiza       | Seed Cultural Personal adornment                             |
| Tres Arroyos           | Socratea exorrhiza       | Spear leaf Utensils & tools Labour tools                     |
| Tres Arroyos           | Socratea exorrhiza       | Stem Construction Houses                                     |
| Tres Arroyos           | Socratea exorrhiza       | Stem Construction Thatch                                     |
| Tres Arroyos           | Socratea exorrhiza       | Stem Other Miscellaneous                                     |
| Sta. Rosa de Maravilla | Astrocaryum gratum       | Leaf rachis Utensils & tools Domestic utensils               |
| Sta. Rosa de Maravilla | Astrocaryum gratum       | Palm heart Human food Food                                   |
| Sta. Rosa de Maravilla | Astrocaryum gratum       | Stem Construction Houses                                     |
| Sta. Rosa de Maravilla | Attalea princeps         | Bract Cultural Recreational                                  |
| Sta. Rosa de Maravilla | Attalea princeps         | Entire leaf Construction Thatch                              |
| Sta. Rosa de Maravilla | Attalea princeps         | Fruit Human food Food                                        |
| Sta. Rosa de Maravilla | Attalea princeps         | Leaf rachis Utensils & tools Domestic utensils               |
| Sta. Rosa de Maravilla | Attalea princeps         | Palm heart Human food Food                                   |
| Sta. Rosa de Maravilla | Attalea princeps         | Root Medicinal & veterinary Respiratory system               |
| Sta. Rosa de Maravilla | Attalea princeps         | Seed Cultural Cosmetic                                       |
| Sta. Rosa de Maravilla | Attalea princeps         | Seed Human food Food                                         |
| Sta. Rosa de Maravilla | Attalea princeps         | Spear leaf Cultural Clothes and accessories                  |
| Sta. Rosa de Maravilla | Attalea princeps         | Spear leaf Utensils & tools Domestic utensils                |
| Sta. Rosa de Maravilla | Chamaedorea angustisecta | Entire leaf Cultural Ritual                                  |
| Sta. Rosa de Maravilla | Chamaedorea angustisecta | Flower Cultural Cosmetic                                     |
| Sta. Rosa de Maravilla | Chamaedorea angustisecta | Flower Medicinal & veterinary Respiratory system             |
| Sta. Rosa de Maravilla | Chamaedorea pinnatifrons | Flower Medicinal & veterinary Respiratory system             |
| Sta. Rosa de Maravilla | Euterpe precatoria       | Entire leaf Construction Thatch                              |
| Sta. Rosa de Maravilla | Euterpe precatoria       | Fruit Human food Beverages                                   |
| Sta. Rosa de Maravilla | Euterpe precatoria       | Palm heart Human food Food                                   |
| Sta. Rosa de Maravilla | Euterpe precatoria       | Root Medicinal & veterinary Urinary system                   |
| Sta. Rosa de Maravilla | Euterpe precatoria       | Stem Construction Houses                                     |
| Sta. Rosa de Maravilla | Geonoma deversa          | Entire leaf Construction Thatch                              |
| Sta. Rosa de Maravilla | Iriarteia deltoidea      | Entire leaf Construction Thatch                              |
| Sta. Rosa de Maravilla | Iriarteia deltoidea      | Stem Construction Houses                                     |
| Sta. Rosa de Maravilla | Mauritia flexuosa        | Fruit Human food Beverages                                   |
| Sta. Rosa de Maravilla | Mauritia flexuosa        | Fruit Human food Food                                        |
| Sta. Rosa de Maravilla | Mauritia flexuosa        | Spear leaf Cultural Clothes and accessories                  |
| Sta. Rosa de Maravilla | Mauritia flexuosa        | Spear leaf Utensils & tools Domestic utensils                |
| Sta. Rosa de Maravilla | Oenocarpus bataua        | Entire leaf Construction Thatch                              |
| Sta. Rosa de Maravilla | Oenocarpus bataua        | Fruit Human food Beverages                                   |
| Sta. Rosa de Maravilla | Oenocarpus bataua        | Fruit Human food Food                                        |
| Sta. Rosa de Maravilla | Oenocarpus bataua        | Fruit Human food Oils                                        |
| Sta. Rosa de Maravilla | Oenocarpus bataua        | Root Medicinal & veterinary Respiratory system               |
| Sta. Rosa de Maravilla | Oenocarpus bataua        | Stem Other Miscellaneous                                     |
| Sta. Rosa de Maravilla | Oenocarpus mapora        | Entire leaf Construction Thatch                              |
| Sta. Rosa de Maravilla | Oenocarpus mapora        | Fruit Human food Beverages                                   |
| Sta. Rosa de Maravilla | Oenocarpus mapora        | Fruit Human food Oils                                        |
| Sta. Rosa de Maravilla | Oenocarpus mapora        | Stem Construction Houses                                     |

|                        |                        |                                                          |
|------------------------|------------------------|----------------------------------------------------------|
| Sta. Rosa de Maravilla | Oenocarpus mapora      | Stem Utensils & tools Domestic utensils                  |
| Sta. Rosa de Maravilla | Phytelephas macrocarpa | Entire leaf Construction Thatch                          |
| Sta. Rosa de Maravilla | Phytelephas macrocarpa | Fruit Human food Beverages                               |
| Sta. Rosa de Maravilla | Phytelephas macrocarpa | Fruit Human food Food                                    |
| Sta. Rosa de Maravilla | Phytelephas macrocarpa | Seed Human food Food                                     |
| Sta. Rosa de Maravilla | Socratea exorrhiza     | Root Medicinal & veterinary Skin and subcutaneous tissue |
| Sta. Rosa de Maravilla | Socratea exorrhiza     | Stem Construction Houses                                 |
| Sta. Rosa de Maravilla | Socratea exorrhiza     | Stem Utensils & tools Domestic utensils                  |
| Sibundoy               | Astrocaryum chambira   | Fruit Cultural Personal adornment                        |
| Sibundoy               | Ceroxylon ventricosum  | Entire leaf Construction Thatch                          |
| Sibundoy               | Ceroxylon ventricosum  | Leaf rachis Utensils & tools Hunting and fishing         |
| Sibundoy               | Ceroxylon ventricosum  | Spear leaf Cultural Clothes and accessories              |
| Sibundoy               | Ceroxylon ventricosum  | Spear leaf Cultural Ritual                               |
| Sibundoy               | Ceroxylon ventricosum  | Spear leaf Utensils & tools Domestic utensils            |
| Sibundoy               | Ceroxylon ventricosum  | Stem Construction Houses                                 |
| Sibundoy               | Ceroxylon ventricosum  | Stem Utensils & tools Hunting and fishing                |
| Sibundoy               | Ceroxylon ventricosum  | Stem Utensils & tools Labour tools                       |
| Sibundoy               | Ceroxylon vogelianum   | Entire leaf Construction Thatch                          |
| Sibundoy               | Ceroxylon vogelianum   | Entire leaf Cultural Ritual                              |
| Sibundoy               | Ceroxylon vogelianum   | Entire plant Environmental Ornamental                    |
| Sibundoy               | Ceroxylon vogelianum   | Leaf rachis Utensils & tools Hunting and fishing         |
| Sibundoy               | Ceroxylon vogelianum   | Leaf rachis Utensils & tools Rope                        |
| Sibundoy               | Ceroxylon vogelianum   | Leaf sheath Cultural Clothes and accessories             |
| Sibundoy               | Ceroxylon vogelianum   | Petiole Construction Houses                              |
| Sibundoy               | Ceroxylon vogelianum   | Seed Cultural Recreational                               |
| Sibundoy               | Ceroxylon vogelianum   | Spear leaf Cultural Clothes and accessories              |
| Sibundoy               | Ceroxylon vogelianum   | Spear leaf Cultural Ritual                               |
| Sibundoy               | Ceroxylon vogelianum   | Spear leaf Utensils & tools Domestic utensils            |
| Sibundoy               | Ceroxylon vogelianum   | Stem Construction Bridges                                |
| Sibundoy               | Ceroxylon vogelianum   | Stem Construction Houses                                 |
| Sibundoy               | Ceroxylon vogelianum   | Stem Construction Other                                  |
| Sibundoy               | Ceroxylon vogelianum   | Stem Construction Thatch                                 |
| Sibundoy               | Ceroxylon vogelianum   | Stem Cultural Personal adornment                         |
| Sibundoy               | Ceroxylon vogelianum   | Stem Environmental Fences                                |
| Sibundoy               | Ceroxylon vogelianum   | Stem Utensils & tools Domestic utensils                  |
| Sibundoy               | Ceroxylon vogelianum   | Stem Utensils & tools Hunting and fishing                |
| Sibundoy               | Ceroxylon vogelianum   | Stem Utensils & tools Labour tools                       |
| Sibundoy               | Euterpe precatoria     | Palm heart Human food Food                               |
| Sibundoy               | Geonoma undata         | Entire leaf Construction Thatch                          |
| Sibundoy               | Geonoma undata         | Entire leaf Utensils & tools Domestic utensils           |
| Sibundoy               | Geonoma undata         | Stem Construction Houses                                 |
| Sibundoy               | Geonoma undata         | Stem Utensils & tools Hunting and fishing                |
| Sibundoy               | Iriarteia deltoidea    | Entire leaf Construction Thatch                          |
| Sibundoy               | Iriarteia deltoidea    | Seed Cultural Recreational                               |
| Sibundoy               | Iriarteia deltoidea    | Stem Construction Houses                                 |
| Sibundoy               | Iriarteia deltoidea    | Stem Construction Thatch                                 |
| Sibundoy               | Iriarteia deltoidea    | Stem Utensils & tools Domestic utensils                  |
| Sibundoy               | Iriarteia deltoidea    | Stem Utensils & tools Hunting and fishing                |
| Sibundoy               | Iriarteia deltoidea    | Stem Utensils & tools Labour tools                       |
| Sibundoy               | Oenocarpus bataua      | Entire leaf Utensils & tools Domestic utensils           |
| Sibundoy               | Oenocarpus bataua      | Fruit Human food Beverages                               |
| Sibundoy               | Oenocarpus bataua      | Fruit Human food Food                                    |
| Sibundoy               | Oenocarpus bataua      | Fruit Human food Oils                                    |
| Sibundoy               | Oenocarpus bataua      | Palm heart Human food Food                               |
| Sibundoy               | Oenocarpus bataua      | Seed Cultural Personal adornment                         |
| Sibundoy               | Prestoea acuminata     | Entire leaf Construction Thatch                          |
| Sibundoy               | Prestoea acuminata     | Entire leaf Utensils & tools Domestic utensils           |
| Sibundoy               | Prestoea acuminata     | Entire plant Cultural Ritual                             |
| Sibundoy               | Prestoea acuminata     | Leaf rachis Utensils & tools Domestic utensils           |
| Sibundoy               | Prestoea acuminata     | Palm heart Human food Food                               |
| Sibundoy               | Prestoea acuminata     | Root Environmental Soil improvers                        |
| Sibundoy               | Prestoea acuminata     | Seed Cultural Recreational                               |
| Sibundoy               | Prestoea acuminata     | Spear leaf Cultural Clothes and accessories              |
| Sibundoy               | Prestoea acuminata     | Spear leaf Cultural Recreational                         |
| Sibundoy               | Prestoea acuminata     | Spear leaf Cultural Ritual                               |
| Sibundoy               | Prestoea acuminata     | Spear leaf Utensils & tools Domestic utensils            |
| Sibundoy               | Prestoea acuminata     | Stem Construction Bridges                                |
| Sibundoy               | Prestoea acuminata     | Stem Construction Houses                                 |
| Sibundoy               | Prestoea acuminata     | Stem Fuel Firewood                                       |
| Sibundoy               | Prestoea acuminata     | Stem Utensils & tools Domestic utensils                  |
| Sibundoy               | Prestoea acuminata     | Stem Utensils & tools Labour tools                       |
| Sibundoy               | Prestoea acuminata     | Stem Utensils & tools Rope                               |
| Sibundoy               | Socratea exorrhiza     | Root Utensils & tools Domestic utensils                  |
| Sibundoy               | Socratea exorrhiza     | Seed Cultural Personal adornment                         |
| Secejsama              | Aiphanes horrida       | Seed Human food Food                                     |
| Secejsama              | Bactris major          | Fruit Human food Food                                    |
| Secejsama              | Bactris major          | Stem Cultural Recreational                               |
| Secejsama              | Euterpe precatoria     | Fruit Human food Beverages                               |
| Secejsama              | Euterpe precatoria     | Palm heart Human food Food                               |
| Secejsama              | Geonoma brongniartii   | Entire leaf Construction Thatch                          |
| Secejsama              | Geonoma deversa        | Entire leaf Construction Thatch                          |
| Secejsama              | Geonoma deversa        | Stem Utensils & tools Domestic utensils                  |
| Secejsama              | Geonoma macrostachys   | Entire leaf Construction Thatch                          |
| Secejsama              | Iriarteia deltoidea    | Entire leaf Construction Thatch                          |
| Secejsama              | Iriarteia deltoidea    | Fruit Cultural Recreational                              |
| Secejsama              | Iriarteia deltoidea    | Leaf rachis Utensils & tools Domestic utensils           |
| Secejsama              | Iriarteia deltoidea    | Leaf sheath Utensils & tools Domestic utensils           |

|                         |                           |                                                                         |
|-------------------------|---------------------------|-------------------------------------------------------------------------|
| Secejsama               | Iriartea deltoidea        | Palm heart Human food Food                                              |
| Secejsama               | Iriartea deltoidea        | Stem Construction Houses                                                |
| Secejsama               | Iriartea deltoidea        | Stem Other Miscellaneous                                                |
| Secejsama               | Iriartea deltoidea        | Stem Utensils & tools Domestic utensils                                 |
| Secejsama               | Mauritia flexuosa         | Entire leaf Construction Thatch                                         |
| Secejsama               | Mauritia flexuosa         | Fruit Human food Food                                                   |
| Secejsama               | Oenocarpus bataua         | Entire leaf Construction Thatch                                         |
| Secejsama               | Oenocarpus bataua         | Fruit Cultural Cosmetic                                                 |
| Secejsama               | Oenocarpus bataua         | Fruit Human food Beverages                                              |
| Secejsama               | Oenocarpus bataua         | Fruit Human food Oils                                                   |
| Secejsama               | Oenocarpus bataua         | Fruit Medicinal & veterinary Cultural diseases and disorders            |
| Secejsama               | Oenocarpus bataua         | Fruit Medicinal & veterinary Musculo-skeletal system                    |
| Secejsama               | Oenocarpus bataua         | Infrutescence Utensils & tools Domestic utensils                        |
| Secejsama               | Oenocarpus bataua         | Leaf rachis Utensils & tools Domestic utensils                          |
| Secejsama               | Oenocarpus bataua         | Stem Construction Houses                                                |
| Secejsama               | Oenocarpus bataua         | Stem Other Miscellaneous                                                |
| Secejsama               | Socratea exorrhiza        | Seed Cultural Personal adornment                                        |
| Secejsama               | Socratea exorrhiza        | Stem Construction Houses                                                |
| Secejsama               | Socratea exorrhiza        | Stem Utensils & tools Domestic utensils                                 |
| Santo Domingo (Bolivia) | Aiphanes horrida          | Seed Human food Beverages                                               |
| Santo Domingo (Bolivia) | Aiphanes horrida          | Seed Human food Food                                                    |
| Santo Domingo (Bolivia) | Attalea princeps          | Bract Cultural Recreational                                             |
| Santo Domingo (Bolivia) | Attalea princeps          | Bract Human food Food additives                                         |
| Santo Domingo (Bolivia) | Attalea princeps          | Bract Utensils & tools Domestic utensils                                |
| Santo Domingo (Bolivia) | Attalea princeps          | Entire leaf Construction Thatch                                         |
| Santo Domingo (Bolivia) | Attalea princeps          | Fruit Human food Food                                                   |
| Santo Domingo (Bolivia) | Attalea princeps          | Leaf rachis Utensils & tools Domestic utensils                          |
| Santo Domingo (Bolivia) | Attalea princeps          | Root Medicinal & veterinary Pregnancy, birth and puerperial             |
| Santo Domingo (Bolivia) | Attalea princeps          | Seed Cultural Cosmetic                                                  |
| Santo Domingo (Bolivia) | Attalea princeps          | Seed Human food Food                                                    |
| Santo Domingo (Bolivia) | Attalea princeps          | Stem Other Miscellaneous                                                |
| Santo Domingo (Bolivia) | Ceroxylon parvum          | Spear leaf Cultural Ritual                                              |
| Santo Domingo (Bolivia) | Ceroxylon parvum          | Spear leaf Medicinal & veterinary Cultural diseases and disorders       |
| Santo Domingo (Bolivia) | Chamaedorea angustisecta  | Flower Cultural Cosmetic                                                |
| Santo Domingo (Bolivia) | Chamaedorea angustisecta  | Flower Medicinal & veterinary Digestive system                          |
| Santo Domingo (Bolivia) | Chamaedorea angustisecta  | Flower Medicinal & veterinary General Ailments with Unspecific Symptoms |
| Santo Domingo (Bolivia) | Chamaedorea pinnatifrons  | Entire leaf Utensils & tools Wrappers                                   |
| Santo Domingo (Bolivia) | Chamaedorea pinnatifrons  | Spear leaf Medicinal & veterinary Cultural diseases and disorders       |
| Santo Domingo (Bolivia) | Dictyocaryum lamarckianum | Entire leaf Construction Thatch                                         |
| Santo Domingo (Bolivia) | Dictyocaryum lamarckianum | Fruit Cultural Recreational                                             |
| Santo Domingo (Bolivia) | Dictyocaryum lamarckianum | Leaf rachis Utensils & tools Domestic utensils                          |
| Santo Domingo (Bolivia) | Dictyocaryum lamarckianum | Leaf sheath Utensils & tools Domestic utensils                          |
| Santo Domingo (Bolivia) | Dictyocaryum lamarckianum | Palm heart Human food Food                                              |
| Santo Domingo (Bolivia) | Dictyocaryum lamarckianum | Stem Construction Bridges                                               |
| Santo Domingo (Bolivia) | Dictyocaryum lamarckianum | Stem Construction Houses                                                |
| Santo Domingo (Bolivia) | Dictyocaryum lamarckianum | Stem Construction Other                                                 |
| Santo Domingo (Bolivia) | Euterpe precatoria        | Fruit Human food Beverages                                              |
| Santo Domingo (Bolivia) | Euterpe precatoria        | Leaf rachis Utensils & tools Hunting and fishing                        |
| Santo Domingo (Bolivia) | Euterpe precatoria        | Palm heart Human food Food                                              |
| Santo Domingo (Bolivia) | Euterpe precatoria        | Root Medicinal & veterinary Musculo-skeletal system                     |
| Santo Domingo (Bolivia) | Euterpe precatoria        | Stem Construction Houses                                                |
| Santo Domingo (Bolivia) | Euterpe precatoria        | Stem Utensils & tools Domestic utensils                                 |
| Santo Domingo (Bolivia) | Euterpe precatoria        | Stem Utensils & tools Hunting and fishing                               |
| Santo Domingo (Bolivia) | Euterpe precatoria        | Stem Utensils & tools Labour tools                                      |
| Santo Domingo (Bolivia) | Geonoma deversa           | Entire leaf Construction Thatch                                         |
| Santo Domingo (Bolivia) | Geonoma undata            | Entire leaf Construction Thatch                                         |
| Santo Domingo (Bolivia) | Iriartea deltoidea        | Entire leaf Construction Thatch                                         |
| Santo Domingo (Bolivia) | Iriartea deltoidea        | Fruit Cultural Recreational                                             |
| Santo Domingo (Bolivia) | Iriartea deltoidea        | Leaf rachis Utensils & tools Domestic utensils                          |
| Santo Domingo (Bolivia) | Iriartea deltoidea        | Leaf sheath Utensils & tools Domestic utensils                          |
| Santo Domingo (Bolivia) | Iriartea deltoidea        | Palm heart Human food Food                                              |
| Santo Domingo (Bolivia) | Iriartea deltoidea        | Stem Construction Bridges                                               |
| Santo Domingo (Bolivia) | Iriartea deltoidea        | Stem Construction Houses                                                |
| Santo Domingo (Bolivia) | Iriartea deltoidea        | Stem Construction Other                                                 |
| Santo Domingo (Bolivia) | Iriartea deltoidea        | Stem Construction Thatch                                                |
| Santo Domingo (Bolivia) | Oenocarpus bataua         | Entire leaf Construction Thatch                                         |
| Santo Domingo (Bolivia) | Oenocarpus bataua         | Fruit Cultural Cosmetic                                                 |
| Santo Domingo (Bolivia) | Oenocarpus bataua         | Fruit Human food Beverages                                              |
| Santo Domingo (Bolivia) | Oenocarpus bataua         | Fruit Medicinal & veterinary Respiratory system                         |
| Santo Domingo (Bolivia) | Oenocarpus bataua         | Palm heart Human food Food                                              |
| Santo Domingo (Bolivia) | Oenocarpus bataua         | Stem Other Miscellaneous                                                |
| Santo Domingo (Bolivia) | Socratea exorrhiza        | Entire leaf Construction Thatch                                         |
| Santo Domingo (Bolivia) | Socratea exorrhiza        | Palm heart Human food Food                                              |
| Santo Domingo (Bolivia) | Socratea exorrhiza        | Root Cultural Recreational                                              |
| Santo Domingo (Bolivia) | Socratea exorrhiza        | Root Medicinal & veterinary Skin and subcutaneous tissue                |
| Santo Domingo (Bolivia) | Socratea exorrhiza        | Stem Construction Houses                                                |
| Santo Domingo (Bolivia) | Socratea exorrhiza        | Stem Construction Other                                                 |
| Santo Domingo (Bolivia) | Socratea exorrhiza        | Stem Utensils & tools Domestic utensils                                 |
| Santiago                | Astrocaryum chambira      | Spear leaf Cultural Clothes and accessories                             |
| Santiago                | Astrocaryum chambira      | Spear leaf Cultural Personal adornment                                  |
| Santiago                | Ceroxylon ventricosum     | Entire leaf Construction Thatch                                         |
| Santiago                | Ceroxylon ventricosum     | Palm heart Human food Food                                              |
| Santiago                | Ceroxylon ventricosum     | Spear leaf Cultural Clothes and accessories                             |
| Santiago                | Ceroxylon ventricosum     | Spear leaf Cultural Ritual                                              |
| Santiago                | Ceroxylon ventricosum     | Spear leaf Utensils & tools Domestic utensils                           |
| Santiago                | Ceroxylon ventricosum     | Spear leaf Utensils & tools Rope                                        |
| Santiago                | Ceroxylon ventricosum     | Stem Construction Bridges                                               |

|            |                          |                                                         |
|------------|--------------------------|---------------------------------------------------------|
| Santiago   | Ceroxylon ventricosum    | Stem Construction Houses                                |
| Santiago   | Ceroxylon ventricosum    | Stem Construction Other                                 |
| Santiago   | Ceroxylon ventricosum    | Stem Cultural Recreational                              |
| Santiago   | Ceroxylon ventricosum    | Stem Fuel Firewood                                      |
| Santiago   | Ceroxylon ventricosum    | Stem Utensils & tools Domestic utensils                 |
| Santiago   | Ceroxylon ventricosum    | Stem Utensils & tools Hunting and fishing               |
| Santiago   | Ceroxylon ventricosum    | Stem Utensils & tools Labour tools                      |
| Santiago   | Ceroxylon vogelianum     | Entire leaf Construction Thatch                         |
| Santiago   | Ceroxylon vogelianum     | Palm heart Human food Food                              |
| Santiago   | Ceroxylon vogelianum     | Spear leaf Cultural Clothes and accessories             |
| Santiago   | Ceroxylon vogelianum     | Spear leaf Cultural Ritual                              |
| Santiago   | Ceroxylon vogelianum     | Spear leaf Utensils & tools Domestic utensils           |
| Santiago   | Ceroxylon vogelianum     | Spear leaf Utensils & tools Rope                        |
| Santiago   | Ceroxylon vogelianum     | Stem Construction Bridges                               |
| Santiago   | Ceroxylon vogelianum     | Stem Construction Houses                                |
| Santiago   | Ceroxylon vogelianum     | Stem Construction Other                                 |
| Santiago   | Ceroxylon vogelianum     | Stem Cultural Recreational                              |
| Santiago   | Ceroxylon vogelianum     | Stem Fuel Firewood                                      |
| Santiago   | Ceroxylon vogelianum     | Stem Utensils & tools Domestic utensils                 |
| Santiago   | Ceroxylon vogelianum     | Stem Utensils & tools Hunting and fishing               |
| Santiago   | Ceroxylon vogelianum     | Stem Utensils & tools Labour tools                      |
| Santiago   | Chamaedorea linearis     | Stem Utensils & tools Labour tools                      |
| Santiago   | Chamaedorea pinnatifrons | Root Utensils & tools Domestic utensils                 |
| Santiago   | Euterpe precatória       | Root Medicinal & veterinary Digestive system            |
| Santiago   | Euterpe precatória       | Root Medicinal & veterinary Infections and infestations |
| Santiago   | Geonoma undata           | Entire leaf Construction Thatch                         |
| Santiago   | Geonoma undata           | Stem Construction Houses                                |
| Santiago   | Geonoma undata           | Stem Construction Other                                 |
| Santiago   | Iriarteia deltoidea      | Entire leaf Construction Thatch                         |
| Santiago   | Iriarteia deltoidea      | Root Utensils & tools Domestic utensils                 |
| Santiago   | Iriarteia deltoidea      | Stem Construction Houses                                |
| Santiago   | Iriarteia deltoidea      | Stem Utensils & tools Domestic utensils                 |
| Santiago   | Iriarteia deltoidea      | Stem Utensils & tools Hunting and fishing               |
| Santiago   | Iriarteia deltoidea      | Stem Utensils & tools Labour tools                      |
| Santiago   | Iriarteia deltoidea      | Stem Utensils & tools Other                             |
| Santiago   | Manicaria saccifera      | Entire leaf Construction Thatch                         |
| Santiago   | Oenocarpus bataua        | Entire leaf Construction Thatch                         |
| Santiago   | Oenocarpus bataua        | Fruit Human food Beverages                              |
| Santiago   | Oenocarpus bataua        | Fruit Human food Food                                   |
| Santiago   | Oenocarpus bataua        | Fruit Human food Oils                                   |
| Santiago   | Oenocarpus bataua        | Fruit Medicinal & veterinary Respiratory system         |
| Santiago   | Oenocarpus bataua        | Seed Cultural Personal adornment                        |
| Santiago   | Oenocarpus bataua        | Stem Construction Houses                                |
| Santiago   | Prestoea acuminata       | Entire leaf Construction Thatch                         |
| Santiago   | Prestoea acuminata       | Entire plant Cultural Ritual                            |
| Santiago   | Prestoea acuminata       | Palm heart Human food Food                              |
| Santiago   | Prestoea acuminata       | Root Medicinal & veterinary Not specified at all        |
| Santiago   | Prestoea acuminata       | Spear leaf Utensils & tools Domestic utensils           |
| Santiago   | Prestoea acuminata       | Stem Construction Houses                                |
| Santiago   | Prestoea acuminata       | Stem Environmental Fences                               |
| Santiago   | Socratea exorrhiza       | Root Medicinal & veterinary Digestive system            |
| Santiago   | Socratea exorrhiza       | Stem Utensils & tools Labour tools                      |
| Santa Rosa | Astrocaryum gratum       | Fruit Human food Food                                   |
| Santa Rosa | Astrocaryum gratum       | Infrutescence Utensils & tools Domestic utensils        |
| Santa Rosa | Astrocaryum gratum       | Stem Construction Houses                                |
| Santa Rosa | Attalea maripa           | Entire leaf Construction Thatch                         |
| Santa Rosa | Attalea maripa           | Fruit Human food Food                                   |
| Santa Rosa | Attalea maripa           | Stem Other Miscellaneous                                |
| Santa Rosa | Bactris concinna         | Fruit Human food Food                                   |
| Santa Rosa | Chamaedorea angustisecta | Fruit Human food Food                                   |
| Santa Rosa | Chelyocarpus ulei        | Entire leaf Construction Thatch                         |
| Santa Rosa | Chelyocarpus ulei        | Petiole Utensils & tools Domestic utensils              |
| Santa Rosa | Chelyocarpus ulei        | Spear leaf Cultural Clothes and accessories             |
| Santa Rosa | Euterpe precatória       | Entire leaf Construction Thatch                         |
| Santa Rosa | Euterpe precatória       | Fruit Human food Beverages                              |
| Santa Rosa | Euterpe precatória       | Fruit Human food Food                                   |
| Santa Rosa | Euterpe precatória       | Palm heart Human food Food                              |
| Santa Rosa | Euterpe precatória       | Root Medicinal & veterinary Digestive system            |
| Santa Rosa | Euterpe precatória       | Root Medicinal & veterinary Urinary system              |
| Santa Rosa | Euterpe precatória       | Stem Construction Houses                                |
| Santa Rosa | Geonoma deversa          | Entire leaf Construction Thatch                         |
| Santa Rosa | Geonoma deversa          | Fruit Human food Food                                   |
| Santa Rosa | Hyospathe elegans        | Entire leaf Construction Thatch                         |
| Santa Rosa | Iriarteia deltoidea      | Entire leaf Construction Thatch                         |
| Santa Rosa | Iriarteia deltoidea      | Leaf rachis Construction Thatch                         |
| Santa Rosa | Iriarteia deltoidea      | Palm heart Human food Food                              |
| Santa Rosa | Iriarteia deltoidea      | Stem Construction Houses                                |
| Santa Rosa | Iriarteia deltoidea      | Stem Other Miscellaneous                                |
| Santa Rosa | Mauritia flexuosa        | Fruit Human food Beverages                              |
| Santa Rosa | Mauritia flexuosa        | Fruit Human food Food                                   |
| Santa Rosa | Mauritia flexuosa        | Petiole Construction Thatch                             |
| Santa Rosa | Mauritia flexuosa        | Stem Construction Houses                                |
| Santa Rosa | Mauritia flexuosa        | Stem Other Miscellaneous                                |
| Santa Rosa | Oenocarpus bataua        | Entire leaf Construction Thatch                         |
| Santa Rosa | Oenocarpus bataua        | Fruit Cultural Cosmetic                                 |
| Santa Rosa | Oenocarpus bataua        | Fruit Human food Beverages                              |
| Santa Rosa | Oenocarpus bataua        | Fruit Human food Food                                   |

|             |                       |                                                                        |
|-------------|-----------------------|------------------------------------------------------------------------|
| Santa Rosa  | Oenocarpus bataua     | Fruit Human food Oils                                                  |
| Santa Rosa  | Oenocarpus bataua     | Fruit Medicinal & veterinary Digestive system                          |
| Santa Rosa  | Oenocarpus bataua     | Fruit Medicinal & veterinary General Ailments with Unspecific Symptoms |
| Santa Rosa  | Oenocarpus bataua     | Stem Construction Houses                                               |
| Santa Rosa  | Oenocarpus bataua     | Stem Other Miscellaneous                                               |
| Santa Rosa  | Oenocarpus mapora     | Fruit Human food Beverages                                             |
| Santa Rosa  | Oenocarpus mapora     | Fruit Human food Food                                                  |
| Santa Rosa  | Oenocarpus mapora     | Stem Construction Houses                                               |
| Santa Rosa  | Phytelphas macrocarpa | Entire leaf Construction Thatch                                        |
| Santa Rosa  | Phytelphas macrocarpa | Seed Human food Food                                                   |
| Santa Rosa  | Socratea exorrhiza    | Entire leaf Construction Thatch                                        |
| Santa Rosa  | Socratea exorrhiza    | Palm heart Human food Food                                             |
| Santa Rosa  | Socratea exorrhiza    | Stem Construction Houses                                               |
| Santa Rosa  | Socratea exorrhiza    | Stem Other Miscellaneous                                               |
| Santa Rosa  | Wettinia augusta      | Entire leaf Construction Thatch                                        |
| Santa Rosa  | Wettinia augusta      | Stem Construction Houses                                               |
| Santa Maréa | Astrocaryum aculeatum | Fruit Cultural Cosmetic                                                |
| Santa Maréa | Astrocaryum aculeatum | Fruit Human food Food                                                  |
| Santa Maréa | Astrocaryum aculeatum | Fruit Medicinal & veterinary General Ailments with Unspecific Symptoms |
| Santa Maréa | Astrocaryum aculeatum | Fruit Medicinal & veterinary Skin and subcutaneous tissue              |
| Santa Maréa | Astrocaryum aculeatum | Fruit Utensils & tools Hunting and fishing                             |
| Santa Maréa | Astrocaryum aculeatum | Leaf rachis Utensils & tools Domestic utensils                         |
| Santa Maréa | Astrocaryum aculeatum | Palm heart Human food Food                                             |
| Santa Maréa | Astrocaryum aculeatum | Seed Other Miscellaneous                                               |
| Santa Maréa | Astrocaryum aculeatum | Spear leaf Cultural Clothes and accessories                            |
| Santa Maréa | Astrocaryum aculeatum | Spear leaf Utensils & tools Domestic utensils                          |
| Santa Maréa | Astrocaryum aculeatum | Stem Construction Houses                                               |
| Santa Maréa | Astrocaryum aculeatum | Stem Other Miscellaneous                                               |
| Santa Maréa | Attalea bassleriana   | Entire leaf Construction Thatch                                        |
| Santa Maréa | Attalea bassleriana   | Fruit Human food Food                                                  |
| Santa Maréa | Attalea bassleriana   | Leaf rachis Utensils & tools Domestic utensils                         |
| Santa Maréa | Attalea bassleriana   | Seed Cultural Cosmetic                                                 |
| Santa Maréa | Attalea bassleriana   | Seed Human food Oils                                                   |
| Santa Maréa | Attalea bassleriana   | Seed Medicinal & veterinary Cultural diseases and disorders            |
| Santa Maréa | Attalea bassleriana   | Seed Medicinal & veterinary General Ailments with Unspecific Symptoms  |
| Santa Maréa | Attalea bassleriana   | Spear leaf Utensils & tools Domestic utensils                          |
| Santa Maréa | Attalea maripa        | Bract Cultural Recreational                                            |
| Santa Maréa | Attalea maripa        | Bract Utensils & tools Domestic utensils                               |
| Santa Maréa | Attalea maripa        | Entire leaf Construction Thatch                                        |
| Santa Maréa | Attalea maripa        | Fruit Animal food Fodder                                               |
| Santa Maréa | Attalea maripa        | Fruit Cultural Personal adornment                                      |
| Santa Maréa | Attalea maripa        | Fruit Human food Food                                                  |
| Santa Maréa | Attalea maripa        | Palm heart Human food Food                                             |
| Santa Maréa | Attalea maripa        | Seed Cultural Cosmetic                                                 |
| Santa Maréa | Attalea maripa        | Spear leaf Utensils & tools Domestic utensils                          |
| Santa Maréa | Attalea princeps      | Bract Cultural Cosmetic                                                |
| Santa Maréa | Attalea princeps      | Bract Cultural Recreational                                            |
| Santa Maréa | Attalea princeps      | Bract Human food Food additives                                        |
| Santa Maréa | Attalea princeps      | Bract Utensils & tools Domestic utensils                               |
| Santa Maréa | Attalea princeps      | Entire leaf Construction Thatch                                        |
| Santa Maréa | Attalea princeps      | Fruit Human food Beverages                                             |
| Santa Maréa | Attalea princeps      | Fruit Human food Food                                                  |
| Santa Maréa | Attalea princeps      | Fruit Utensils & tools Other                                           |
| Santa Maréa | Attalea princeps      | Infructescence Utensils & tools Domestic utensils                      |
| Santa Maréa | Attalea princeps      | Palm heart Human food Food                                             |
| Santa Maréa | Attalea princeps      | Root Medicinal & veterinary Infections and infestations                |
| Santa Maréa | Attalea princeps      | Seed Cultural Cosmetic                                                 |
| Santa Maréa | Attalea princeps      | Seed Human food Food                                                   |
| Santa Maréa | Attalea princeps      | Seed Medicinal & veterinary Cultural diseases and disorders            |
| Santa Maréa | Attalea princeps      | Seed Medicinal & veterinary General Ailments with Unspecific Symptoms  |
| Santa Maréa | Attalea princeps      | Seed Medicinal & veterinary Skin and subcutaneous tissue               |
| Santa Maréa | Attalea princeps      | Seed Other Miscellaneous                                               |
| Santa Maréa | Attalea princeps      | Spear leaf Cultural Clothes and accessories                            |
| Santa Maréa | Attalea princeps      | Spear leaf Utensils & tools Domestic utensils                          |
| Santa Maréa | Attalea princeps      | Spear leaf Utensils & tools Wrappers                                   |
| Santa Maréa | Attalea princeps      | Stem Other Miscellaneous                                               |
| Santa Maréa | Attalea speciosa      | Entire leaf Construction Thatch                                        |
| Santa Maréa | Attalea speciosa      | Fruit Human food Food                                                  |
| Santa Maréa | Attalea speciosa      | Seed Cultural Cosmetic                                                 |
| Santa Maréa | Attalea speciosa      | Seed Medicinal & veterinary Cultural diseases and disorders            |
| Santa Maréa | Attalea speciosa      | Seed Medicinal & veterinary General Ailments with Unspecific Symptoms  |
| Santa Maréa | Bactris acanthocarpa  | Fruit Human food Food                                                  |
| Santa Maréa | Bactris hirta         | Fruit Human food Food                                                  |
| Santa Maréa | Bactris major         | Fruit Human food Food                                                  |
| Santa Maréa | Bactris major         | Stem Cultural Recreational                                             |
| Santa Maréa | Bactris maraja        | Fruit Human food Food                                                  |
| Santa Maréa | Cheyllocarpus chuco   | Entire leaf Construction Thatch                                        |
| Santa Maréa | Cheyllocarpus chuco   | Spear leaf Cultural Clothes and accessories                            |
| Santa Maréa | Cheyllocarpus chuco   | Spear leaf Utensils & tools Domestic utensils                          |
| Santa Maréa | Cheyllocarpus chuco   | Stem Construction Houses                                               |
| Santa Maréa | Cheyllocarpus chuco   | Stem Utensils & tools Domestic utensils                                |
| Santa Maréa | Euterpe precatoria    | Entire leaf Construction Thatch                                        |
| Santa Maréa | Euterpe precatoria    | Fruit Cultural Cosmetic                                                |
| Santa Maréa | Euterpe precatoria    | Fruit Human food Beverages                                             |
| Santa Maréa | Euterpe precatoria    | Fruit Human food Food                                                  |
| Santa Maréa | Euterpe precatoria    | Fruit Medicinal & veterinary Digestive system                          |
| Santa Maréa | Euterpe precatoria    | Palm heart Human food Food                                             |



|             |                      |                                                                        |
|-------------|----------------------|------------------------------------------------------------------------|
| Santa Maréa | Euterpe precatoria   | Root Medicinal & veterinary Blood and Cardio-vascular system           |
| Santa Maréa | Euterpe precatoria   | Root Medicinal & veterinary Infections and infestations                |
| Santa Maréa | Euterpe precatoria   | Seed Cultural Personal adornment                                       |
| Santa Maréa | Euterpe precatoria   | Spear leaf Cultural Clothes and accessories                            |
| Santa Maréa | Euterpe precatoria   | Spear leaf Utensils & tools Domestic utensils                          |
| Santa Maréa | Euterpe precatoria   | Stem Construction Houses                                               |
| Santa Maréa | Euterpe precatoria   | Stem Utensils & tools Domestic utensils                                |
| Santa Maréa | Euterpe precatoria   | Stem Utensils & tools Labour tools                                     |
| Santa Maréa | Geonoma deversa      | Entire leaf Construction Thatch                                        |
| Santa Maréa | Iriarteia deltoidea  | Entire plant Environmental Soil improvers                              |
| Santa Maréa | Iriarteia deltoidea  | Stem Construction Bridges                                              |
| Santa Maréa | Iriarteia deltoidea  | Stem Construction Houses                                               |
| Santa Maréa | Iriarteia deltoidea  | Stem Construction Other                                                |
| Santa Maréa | Iriarteia deltoidea  | Stem Construction Transportation                                       |
| Santa Maréa | Iriarteia deltoidea  | Stem Utensils & tools Domestic utensils                                |
| Santa Maréa | Mauritia flexuosa    | Entire leaf Construction Thatch                                        |
| Santa Maréa | Mauritia flexuosa    | Entire plant Environmental Soil improvers                              |
| Santa Maréa | Mauritia flexuosa    | Fruit Animal food Fodder                                               |
| Santa Maréa | Mauritia flexuosa    | Fruit Cultural Cosmetic                                                |
| Santa Maréa | Mauritia flexuosa    | Fruit Human food Beverages                                             |
| Santa Maréa | Mauritia flexuosa    | Fruit Human food Food                                                  |
| Santa Maréa | Mauritia flexuosa    | Fruit Medicinal & veterinary Reproductive system and sex health        |
| Santa Maréa | Mauritia flexuosa    | Fruit Medicinal & veterinary Skin and subcutaneous tissue              |
| Santa Maréa | Mauritia flexuosa    | Petiole Utensils & tools Domestic utensils                             |
| Santa Maréa | Mauritia flexuosa    | Spear leaf Cultural Clothes and accessories                            |
| Santa Maréa | Mauritia flexuosa    | Spear leaf Utensils & tools Domestic utensils                          |
| Santa Maréa | Mauritia flexuosa    | Spear leaf Utensils & tools Rope                                       |
| Santa Maréa | Mauritia flexuosa    | Stem Construction Bridges                                              |
| Santa Maréa | Mauritia flexuosa    | Stem Human food Food                                                   |
| Santa Maréa | Oenocarpus bataua    | Entire leaf Construction Thatch                                        |
| Santa Maréa | Oenocarpus bataua    | Fruit Cultural Cosmetic                                                |
| Santa Maréa | Oenocarpus bataua    | Fruit Human food Beverages                                             |
| Santa Maréa | Oenocarpus bataua    | Fruit Human food Food                                                  |
| Santa Maréa | Oenocarpus bataua    | Fruit Medicinal & veterinary Digestive system                          |
| Santa Maréa | Oenocarpus bataua    | Fruit Medicinal & veterinary General Ailments with Unspecific Symptoms |
| Santa Maréa | Oenocarpus bataua    | Fruit Medicinal & veterinary Respiratory system                        |
| Santa Maréa | Oenocarpus bataua    | Fruit Medicinal & veterinary Skin and subcutaneous tissue              |
| Santa Maréa | Oenocarpus bataua    | Infrutescence Utensils & tools Domestic utensils                       |
| Santa Maréa | Oenocarpus bataua    | Leaf rachis Utensils & tools Domestic utensils                         |
| Santa Maréa | Oenocarpus bataua    | Spear leaf Utensils & tools Domestic utensils                          |
| Santa Maréa | Oenocarpus bataua    | Stem Construction Houses                                               |
| Santa Maréa | Oenocarpus bataua    | Stem Environmental Soil improvers                                      |
| Santa Maréa | Oenocarpus bataua    | Stem Other Miscellaneous                                               |
| Santa Maréa | Oenocarpus mapora    | Entire leaf Construction Thatch                                        |
| Santa Maréa | Oenocarpus mapora    | Fruit Cultural Cosmetic                                                |
| Santa Maréa | Oenocarpus mapora    | Fruit Human food Beverages                                             |
| Santa Maréa | Oenocarpus mapora    | Stem Construction Houses                                               |
| Santa Maréa | Oenocarpus mapora    | Stem Utensils & tools Domestic utensils                                |
| Santa Maréa | Oenocarpus mapora    | Stem Utensils & tools Hunting and fishing                              |
| Santa Maréa | Oenocarpus mapora    | Stem Utensils & tools Labour tools                                     |
| Santa Maréa | Socratea exorrhiza   | Root Medicinal & veterinary Blood and Cardio-vascular system           |
| Santa Maréa | Socratea exorrhiza   | Root Utensils & tools Domestic utensils                                |
| Santa Maréa | Socratea exorrhiza   | Root Utensils & tools Other                                            |
| Santa Maréa | Socratea exorrhiza   | Seed Cultural Personal adornment                                       |
| Santa Maréa | Socratea exorrhiza   | Spear leaf Utensils & tools Labour tools                               |
| Santa Maréa | Socratea exorrhiza   | Stem Construction Houses                                               |
| Santa Maréa | Socratea exorrhiza   | Stem Utensils & tools Domestic utensils                                |
| Santa Maréa | Syagrus sancona      | Stem Construction Houses                                               |
| Santa Ana   | Astrocaryum chambira | Bract Utensils & tools Domestic utensils                               |
| Santa Ana   | Astrocaryum chambira | Fruit Cultural Personal adornment                                      |
| Santa Ana   | Astrocaryum chambira | Fruit Human food Food                                                  |
| Santa Ana   | Astrocaryum chambira | Leaf rachis Utensils & tools Domestic utensils                         |
| Santa Ana   | Astrocaryum chambira | Seed Human food Food                                                   |
| Santa Ana   | Astrocaryum chambira | Spear leaf Cultural Clothes and accessories                            |
| Santa Ana   | Astrocaryum chambira | Spear leaf Utensils & tools Domestic utensils                          |
| Santa Ana   | Astrocaryum chambira | Spear leaf Utensils & tools Hunting and fishing                        |
| Santa Ana   | Astrocaryum chambira | Spear leaf Utensils & tools Other                                      |
| Santa Ana   | Astrocaryum chambira | Spear leaf Utensils & tools Rope                                       |
| Santa Ana   | Astrocaryum chambira | Stem Cultural Recreational                                             |
| Santa Ana   | Astrocaryum jauari   | Entire leaf Construction Thatch                                        |
| Santa Ana   | Astrocaryum jauari   | Fruit Animal food Fish bait                                            |
| Santa Ana   | Astrocaryum jauari   | Fruit Cultural Personal adornment                                      |
| Santa Ana   | Astrocaryum jauari   | Fruit Human food Food                                                  |
| Santa Ana   | Astrocaryum jauari   | Leaf rachis Utensils & tools Domestic utensils                         |
| Santa Ana   | Astrocaryum jauari   | Seed Human food Food                                                   |
| Santa Ana   | Astrocaryum jauari   | Seed Other Miscellaneous                                               |
| Santa Ana   | Astrocaryum jauari   | Spear leaf Cultural Clothes and accessories                            |
| Santa Ana   | Astrocaryum jauari   | Spear leaf Utensils & tools Domestic utensils                          |
| Santa Ana   | Astrocaryum jauari   | Stem Construction Houses                                               |
| Santa Ana   | Attalea insignis     | Entire leaf Construction Thatch                                        |
| Santa Ana   | Attalea insignis     | Entire leaf Utensils & tools Labour tools                              |
| Santa Ana   | Attalea insignis     | Fruit Human food Food                                                  |
| Santa Ana   | Attalea insignis     | Fruit Human food Oils                                                  |
| Santa Ana   | Attalea insignis     | Petiole Utensils & tools Domestic utensils                             |
| Santa Ana   | Attalea insignis     | Seed Human food Food                                                   |
| Santa Ana   | Attalea insignis     | Spear leaf Utensils & tools Domestic utensils                          |
| Santa Ana   | Attalea maripa       | Entire leaf Utensils & tools Labour tools                              |

|           |                        |                                                             |
|-----------|------------------------|-------------------------------------------------------------|
| Santa Ana | Attalea maripa         | Fruit Human food Beverages                                  |
| Santa Ana | Attalea maripa         | Fruit Human food Food                                       |
| Santa Ana | Attalea maripa         | Leaf rachis Utensils & tools Domestic utensils              |
| Santa Ana | Attalea maripa         | Leaf rachis Utensils & tools Hunting and fishing            |
| Santa Ana | Attalea maripa         | Petiole Construction Houses                                 |
| Santa Ana | Attalea maripa         | Spear leaf Utensils & tools Domestic utensils               |
| Santa Ana | Attalea maripa         | Stem Construction Houses                                    |
| Santa Ana | Attalea maripa         | Stem Human food Food                                        |
| Santa Ana | Attalea microcarpa     | Palm heart Human food Food                                  |
| Santa Ana | Attalea microcarpa     | Spear leaf Utensils & tools Domestic utensils               |
| Santa Ana | Attalea peruviana      | Entire leaf Construction Thatch                             |
| Santa Ana | Attalea peruviana      | Fruit Human food Food                                       |
| Santa Ana | Attalea peruviana      | Seed Human food Food                                        |
| Santa Ana | Attalea peruviana      | Seed Other Miscellaneous                                    |
| Santa Ana | Attalea tessmannii     | Entire leaf Construction Thatch                             |
| Santa Ana | Attalea tessmannii     | Fruit Human food Food                                       |
| Santa Ana | Attalea tessmannii     | Seed Human food Food                                        |
| Santa Ana | Bactris bifida         | Fruit Human food Food                                       |
| Santa Ana | Bactris brongniartii   | Fruit Human food Food                                       |
| Santa Ana | Bactris concinna       | Fruit Human food Food                                       |
| Santa Ana | Bactris hirta          | Fruit Human food Food                                       |
| Santa Ana | Bactris maraja         | Fruit Human food Food                                       |
| Santa Ana | Chelyocarpus ulei      | Entire leaf Construction Thatch                             |
| Santa Ana | Chelyocarpus ulei      | Spear leaf Cultural Clothes and accessories                 |
| Santa Ana | Chelyocarpus ulei      | Spear leaf Utensils & tools Domestic utensils               |
| Santa Ana | Chelyocarpus ulei      | Spear leaf Utensils & tools Wrappers                        |
| Santa Ana | Desmoncus giganteus    | Stem Utensils & tools Other                                 |
| Santa Ana | Desmoncus giganteus    | Stem Utensils & tools Rope                                  |
| Santa Ana | Desmoncus polyacanthos | Stem Utensils & tools Domestic utensils                     |
| Santa Ana | Desmoncus polyacanthos | Stem Utensils & tools Other                                 |
| Santa Ana | Desmoncus polyacanthos | Stem Utensils & tools Rope                                  |
| Santa Ana | Euterpe precatoria     | Entire leaf Construction Thatch                             |
| Santa Ana | Euterpe precatoria     | Fruit Cultural Dyes                                         |
| Santa Ana | Euterpe precatoria     | Fruit Human food Beverages                                  |
| Santa Ana | Euterpe precatoria     | Fruit Human food Food                                       |
| Santa Ana | Euterpe precatoria     | Palm heart Human food Food                                  |
| Santa Ana | Euterpe precatoria     | Root Cultural Cosmetic                                      |
| Santa Ana | Euterpe precatoria     | Root Medicinal & veterinary Digestive system                |
| Santa Ana | Euterpe precatoria     | Root Medicinal & veterinary Infections and infestations     |
| Santa Ana | Euterpe precatoria     | Root Medicinal & veterinary Musculo-skeletal system         |
| Santa Ana | Euterpe precatoria     | Root Medicinal & veterinary Not specified at all            |
| Santa Ana | Euterpe precatoria     | Root Medicinal & veterinary Pregnancy, birth and puerperial |
| Santa Ana | Euterpe precatoria     | Root Medicinal & veterinary Respiratory system              |
| Santa Ana | Euterpe precatoria     | Root Medicinal & veterinary Urinary system                  |
| Santa Ana | Euterpe precatoria     | Seed Cultural Personal adornment                            |
| Santa Ana | Euterpe precatoria     | Stem Construction Houses                                    |
| Santa Ana | Geonoma macrostachys   | Entire leaf Construction Thatch                             |
| Santa Ana | Geonoma poeppigiana    | Entire leaf Construction Thatch                             |
| Santa Ana | Iriartea deltoidea     | Entire leaf Construction Thatch                             |
| Santa Ana | Iriartea deltoidea     | Fruit Animal food Fodder                                    |
| Santa Ana | Iriartea deltoidea     | Palm heart Human food Food                                  |
| Santa Ana | Iriartea deltoidea     | Stem Construction Houses                                    |
| Santa Ana | Iriartea deltoidea     | Stem Construction Transportation                            |
| Santa Ana | Iriartea deltoidea     | Stem Utensils & tools Domestic utensils                     |
| Santa Ana | Iriartella stenocarpa  | Fruit Cultural Personal adornment                           |
| Santa Ana | Iriartella stenocarpa  | Stem Construction Houses                                    |
| Santa Ana | Iriartella stenocarpa  | Stem Construction Thatch                                    |
| Santa Ana | Iriartella stenocarpa  | Stem Utensils & tools Hunting and fishing                   |
| Santa Ana | Lepidocaryum tenue     | Entire leaf Construction Thatch                             |
| Santa Ana | Mauritia flexuosa      | Entire leaf Construction Thatch                             |
| Santa Ana | Mauritia flexuosa      | Entire leaf Utensils & tools Labour tools                   |
| Santa Ana | Mauritia flexuosa      | Entire plant Environmental Soil improvers                   |
| Santa Ana | Mauritia flexuosa      | Fruit Human food Beverages                                  |
| Santa Ana | Mauritia flexuosa      | Fruit Human food Food                                       |
| Santa Ana | Mauritia flexuosa      | Petiole Construction Houses                                 |
| Santa Ana | Mauritia flexuosa      | Petiole Utensils & tools Domestic utensils                  |
| Santa Ana | Mauritia flexuosa      | Petiole Utensils & tools Labour tools                       |
| Santa Ana | Mauritia flexuosa      | Spear leaf Cultural Clothes and accessories                 |
| Santa Ana | Mauritia flexuosa      | Spear leaf Utensils & tools Domestic utensils               |
| Santa Ana | Mauritia flexuosa      | Stem Construction Houses                                    |
| Santa Ana | Mauritia flexuosa      | Stem Other Miscellaneous                                    |
| Santa Ana | Mauritiella armata     | Entire leaf Construction Thatch                             |
| Santa Ana | Mauritiella armata     | Fruit Human food Food                                       |
| Santa Ana | Mauritiella armata     | Stem Construction Houses                                    |
| Santa Ana | Oenocarpus bataua      | Entire leaf Construction Thatch                             |
| Santa Ana | Oenocarpus bataua      | Entire leaf Utensils & tools Labour tools                   |
| Santa Ana | Oenocarpus bataua      | Fruit Human food Beverages                                  |
| Santa Ana | Oenocarpus bataua      | Fruit Human food Food                                       |
| Santa Ana | Oenocarpus bataua      | Fruit Human food Oils                                       |
| Santa Ana | Oenocarpus bataua      | Palm heart Human food Food                                  |
| Santa Ana | Oenocarpus bataua      | Stem Construction Houses                                    |
| Santa Ana | Oenocarpus bataua      | Stem Other Miscellaneous                                    |
| Santa Ana | Oenocarpus mapora      | Entire leaf Construction Thatch                             |
| Santa Ana | Oenocarpus mapora      | Entire leaf Utensils & tools Labour tools                   |
| Santa Ana | Oenocarpus mapora      | Entire plant Cultural Ritual                                |
| Santa Ana | Oenocarpus mapora      | Fruit Human food Beverages                                  |
| Santa Ana | Oenocarpus mapora      | Fruit Human food Food                                       |

|               |                          |                                                                        |
|---------------|--------------------------|------------------------------------------------------------------------|
| Santa Ana     | Oenocarpus mapora        | Fruit Human food Oils                                                  |
| Santa Ana     | Oenocarpus mapora        | Leaf rachis Utensils & tools Domestic utensils                         |
| Santa Ana     | Oenocarpus mapora        | Stem Construction Houses                                               |
| Santa Ana     | Phytelephas macrocarpa   | Entire leaf Construction Thatch                                        |
| Santa Ana     | Phytelephas macrocarpa   | Entire leaf Utensils & tools Labour tools                              |
| Santa Ana     | Phytelephas macrocarpa   | Fruit Human food Food                                                  |
| Santa Ana     | Phytelephas macrocarpa   | Seed Cultural Other                                                    |
| Santa Ana     | Phytelephas macrocarpa   | Seed Human food Food                                                   |
| Santa Ana     | Phytelephas macrocarpa   | Seed Medicinal & veterinary General Ailments with Unspecific Symptoms  |
| Santa Ana     | Socratea exorrhiza       | Entire leaf Utensils & tools Labour tools                              |
| Santa Ana     | Socratea exorrhiza       | Root Utensils & tools Domestic utensils                                |
| Santa Ana     | Socratea exorrhiza       | Seed Cultural Personal adornment                                       |
| Santa Ana     | Socratea exorrhiza       | Stem Construction Houses                                               |
| Santa Ana     | Socratea exorrhiza       | Stem Construction Other                                                |
| Santa Ana     | Socratea exorrhiza       | Stem Construction Thatch                                               |
| Santa Ana     | Socratea exorrhiza       | Stem Utensils & tools Labour tools                                     |
| Sanandita     | Aiphanes horrida         | Seed Human food Food                                                   |
| Sanandita     | Bactris major            | Fruit Human food Food                                                  |
| Sanandita     | Bactris major            | Stem Cultural Recreational                                             |
| Sanandita     | Euterpe precatoria       | Palm heart Human food Food                                             |
| Sanandita     | Euterpe precatoria       | Stem Construction Houses                                               |
| Sanandita     | Geonoma brongniartii     | Entire leaf Construction Thatch                                        |
| Sanandita     | Geonoma brongniartii     | Spear leaf Utensils & tools Wrappers                                   |
| Sanandita     | Geonoma deversa          | Entire leaf Construction Thatch                                        |
| Sanandita     | Geonoma macrostachys     | Entire leaf Construction Thatch                                        |
| Sanandita     | Iriarteia deltoidea      | Entire leaf Construction Thatch                                        |
| Sanandita     | Iriarteia deltoidea      | Leaf rachis Utensils & tools Domestic utensils                         |
| Sanandita     | Iriarteia deltoidea      | Leaf sheath Utensils & tools Domestic utensils                         |
| Sanandita     | Iriarteia deltoidea      | Palm heart Human food Food                                             |
| Sanandita     | Iriarteia deltoidea      | Stem Construction Houses                                               |
| Sanandita     | Iriarteia deltoidea      | Stem Utensils & tools Domestic utensils                                |
| Sanandita     | Mauritia flexuosa        | Fruit Human food Food                                                  |
| Sanandita     | Oenocarpus bataua        | Entire leaf Construction Thatch                                        |
| Sanandita     | Oenocarpus bataua        | Fruit Cultural Cosmetic                                                |
| Sanandita     | Oenocarpus bataua        | Fruit Human food Beverages                                             |
| Sanandita     | Oenocarpus bataua        | Fruit Human food Oils                                                  |
| Sanandita     | Oenocarpus bataua        | Fruit Medicinal & veterinary General Ailments with Unspecific Symptoms |
| Sanandita     | Oenocarpus bataua        | Stem Other Miscellaneous                                               |
| Sanandita     | Socratea exorrhiza       | Stem Construction Houses                                               |
| Sanandita     | Socratea exorrhiza       | Stem Utensils & tools Domestic utensils                                |
| San Silvestre | Aiphanes horrida         | Seed Cultural Personal adornment                                       |
| San Silvestre | Aiphanes horrida         | Seed Human food Food                                                   |
| San Silvestre | Aiphanes horrida         | Stem Construction Houses                                               |
| San Silvestre | Attalea princeps         | Bract Cultural Recreational                                            |
| San Silvestre | Attalea princeps         | Entire leaf Construction Thatch                                        |
| San Silvestre | Attalea princeps         | Fruit Cultural Personal adornment                                      |
| San Silvestre | Attalea princeps         | Fruit Human food Food                                                  |
| San Silvestre | Attalea princeps         | Leaf rachis Utensils & tools Domestic utensils                         |
| San Silvestre | Attalea princeps         | Palm heart Human food Food                                             |
| San Silvestre | Attalea princeps         | Root Medicinal & veterinary Respiratory system                         |
| San Silvestre | Attalea princeps         | Seed Cultural Cosmetic                                                 |
| San Silvestre | Attalea princeps         | Spear leaf Cultural Clothes and accessories                            |
| San Silvestre | Attalea princeps         | Spear leaf Utensils & tools Domestic utensils                          |
| San Silvestre | Attalea speciosa         | Entire leaf Construction Thatch                                        |
| San Silvestre | Bactris maraja           | Seed Human food Food                                                   |
| San Silvestre | Chamaedorea angustisecta | Flower Cultural Cosmetic                                               |
| San Silvestre | Chamaedorea angustisecta | Flower Medicinal & veterinary Respiratory system                       |
| San Silvestre | Euterpe precatoria       | Entire leaf Construction Thatch                                        |
| San Silvestre | Euterpe precatoria       | Fruit Human food Beverages                                             |
| San Silvestre | Euterpe precatoria       | Fruit Human food Food                                                  |
| San Silvestre | Euterpe precatoria       | Leaf rachis Utensils & tools Domestic utensils                         |
| San Silvestre | Euterpe precatoria       | Palm heart Human food Food                                             |
| San Silvestre | Euterpe precatoria       | Root Medicinal & veterinary Urinary system                             |
| San Silvestre | Euterpe precatoria       | Spear leaf Utensils & tools Domestic utensils                          |
| San Silvestre | Euterpe precatoria       | Stem Construction Houses                                               |
| San Silvestre | Geonoma deversa          | Entire leaf Construction Thatch                                        |
| San Silvestre | Iriarteia deltoidea      | Entire leaf Construction Thatch                                        |
| San Silvestre | Iriarteia deltoidea      | Palm heart Human food Food                                             |
| San Silvestre | Iriarteia deltoidea      | Stem Construction Houses                                               |
| San Silvestre | Iriarteia deltoidea      | Stem Utensils & tools Hunting and fishing                              |
| San Silvestre | Mauritia flexuosa        | Entire leaf Construction Thatch                                        |
| San Silvestre | Mauritia flexuosa        | Fruit Human food Beverages                                             |
| San Silvestre | Mauritia flexuosa        | Fruit Human food Food                                                  |
| San Silvestre | Mauritia flexuosa        | Spear leaf Cultural Clothes and accessories                            |
| San Silvestre | Oenocarpus bataua        | Entire leaf Construction Thatch                                        |
| San Silvestre | Oenocarpus bataua        | Fruit Human food Beverages                                             |
| San Silvestre | Oenocarpus bataua        | Fruit Human food Food                                                  |
| San Silvestre | Oenocarpus bataua        | Fruit Human food Oils                                                  |
| San Silvestre | Oenocarpus bataua        | Stem Other Miscellaneous                                               |
| San Silvestre | Oenocarpus mapora        | Entire leaf Construction Thatch                                        |
| San Silvestre | Oenocarpus mapora        | Fruit Human food Beverages                                             |
| San Silvestre | Oenocarpus mapora        | Fruit Human food Food                                                  |
| San Silvestre | Oenocarpus mapora        | Fruit Human food Oils                                                  |
| San Silvestre | Oenocarpus mapora        | Stem Construction Houses                                               |
| San Silvestre | Phytelephas macrocarpa   | Entire leaf Construction Thatch                                        |
| San Silvestre | Phytelephas macrocarpa   | Fruit Human food Beverages                                             |
| San Silvestre | Phytelephas macrocarpa   | Fruit Human food Food                                                  |

|                         |                         |                                                                             |
|-------------------------|-------------------------|-----------------------------------------------------------------------------|
| San Silvestre           | Phytelphas macrocarpa   | Seed Cultural Personal adornment                                            |
| San Silvestre           | Phytelphas macrocarpa   | Seed Human food Food                                                        |
| San Silvestre           | Phytelphas macrocarpa   | Stem Construction Houses                                                    |
| San Silvestre           | Socratea exorrhiza      | Fruit Cultural Recreational                                                 |
| San Silvestre           | Socratea exorrhiza      | Stem Construction Houses                                                    |
| San Silvestre           | Socratea exorrhiza      | Stem Utensils & tools Domestic utensils                                     |
| San Martin de Amacayacu | Astrocaryum chambira    | Fruit Cultural Personal adornment                                           |
| San Martin de Amacayacu | Astrocaryum chambira    | Fruit Cultural Recreational                                                 |
| San Martin de Amacayacu | Astrocaryum chambira    | Fruit Human food Food                                                       |
| San Martin de Amacayacu | Astrocaryum chambira    | Palm heart Medicinal & veterinary General Ailments with Unspecific Symptoms |
| San Martin de Amacayacu | Astrocaryum chambira    | Seed Human food Beverages                                                   |
| San Martin de Amacayacu | Astrocaryum chambira    | Seed Human food Food                                                        |
| San Martin de Amacayacu | Astrocaryum chambira    | Seed Medicinal & veterinary Digestive system                                |
| San Martin de Amacayacu | Astrocaryum chambira    | Seed Other Miscellaneous                                                    |
| San Martin de Amacayacu | Astrocaryum chambira    | Spear leaf Cultural Clothes and accessories                                 |
| San Martin de Amacayacu | Astrocaryum chambira    | Spear leaf Cultural Personal adornment                                      |
| San Martin de Amacayacu | Astrocaryum chambira    | Spear leaf Utensils & tools Domestic utensils                               |
| San Martin de Amacayacu | Astrocaryum chambira    | Spear leaf Utensils & tools Hunting and fishing                             |
| San Martin de Amacayacu | Astrocaryum chambira    | Spear leaf Utensils & tools Rope                                            |
| San Martin de Amacayacu | Astrocaryum chambira    | Stem Construction Houses                                                    |
| San Martin de Amacayacu | Astrocaryum chambira    | Stem Environmental Fences                                                   |
| San Martin de Amacayacu | Astrocaryum chambira    | Stem Other Miscellaneous                                                    |
| San Martin de Amacayacu | Astrocaryum chambira    | Stem Utensils & tools Hunting and fishing                                   |
| San Martin de Amacayacu | Astrocaryum ferrugineum | Fruit Cultural Personal adornment                                           |
| San Martin de Amacayacu | Astrocaryum ferrugineum | Fruit Cultural Recreational                                                 |
| San Martin de Amacayacu | Astrocaryum ferrugineum | Fruit Human food Food                                                       |
| San Martin de Amacayacu | Astrocaryum ferrugineum | Spear leaf Cultural Ritual                                                  |
| San Martin de Amacayacu | Astrocaryum ferrugineum | Stem Construction Houses                                                    |
| San Martin de Amacayacu | Astrocaryum ferrugineum | Stem Other Miscellaneous                                                    |
| San Martin de Amacayacu | Astrocaryum jauari      | Fruit Animal food Fish bait                                                 |
| San Martin de Amacayacu | Astrocaryum jauari      | Fruit Cultural Personal adornment                                           |
| San Martin de Amacayacu | Astrocaryum jauari      | Fruit Cultural Recreational                                                 |
| San Martin de Amacayacu | Astrocaryum jauari      | Fruit Human food Food                                                       |
| San Martin de Amacayacu | Astrocaryum jauari      | Petiole Utensils & tools Domestic utensils                                  |
| San Martin de Amacayacu | Astrocaryum jauari      | Spear leaf Cultural Clothes and accessories                                 |
| San Martin de Amacayacu | Astrocaryum jauari      | Spear leaf Utensils & tools Domestic utensils                               |
| San Martin de Amacayacu | Astrocaryum jauari      | Stem Construction Houses                                                    |
| San Martin de Amacayacu | Astrocaryum jauari      | Stem Environmental Fences                                                   |
| San Martin de Amacayacu | Astrocaryum jauari      | Stem Other Miscellaneous                                                    |
| San Martin de Amacayacu | Attalea insignis        | Entire leaf Construction Thatch                                             |
| San Martin de Amacayacu | Attalea insignis        | Fruit Cultural Cosmetic                                                     |
| San Martin de Amacayacu | Attalea insignis        | Fruit Cultural Personal adornment                                           |
| San Martin de Amacayacu | Attalea insignis        | Fruit Human food Food                                                       |
| San Martin de Amacayacu | Attalea insignis        | Petiole Utensils & tools Hunting and fishing                                |
| San Martin de Amacayacu | Attalea insignis        | Seed Cultural Cosmetic                                                      |
| San Martin de Amacayacu | Attalea insignis        | Seed Other Miscellaneous                                                    |
| San Martin de Amacayacu | Attalea maripa          | Bract Utensils & tools Labour tools                                         |
| San Martin de Amacayacu | Attalea maripa          | Entire leaf Construction Thatch                                             |
| San Martin de Amacayacu | Attalea maripa          | Entire leaf Utensils & tools Labour tools                                   |
| San Martin de Amacayacu | Attalea maripa          | Fruit Cultural Cosmetic                                                     |
| San Martin de Amacayacu | Attalea maripa          | Fruit Cultural Personal adornment                                           |
| San Martin de Amacayacu | Attalea maripa          | Fruit Human food Beverages                                                  |
| San Martin de Amacayacu | Attalea maripa          | Fruit Human food Food                                                       |
| San Martin de Amacayacu | Attalea maripa          | Fruit Human food Food additives                                             |
| San Martin de Amacayacu | Attalea maripa          | Fruit Medicinal & veterinary Reproductive system and sex health             |
| San Martin de Amacayacu | Attalea maripa          | Fruit Utensils & tools Labour tools                                         |
| San Martin de Amacayacu | Attalea maripa          | Leaf rachis Utensils & tools Hunting and fishing                            |
| San Martin de Amacayacu | Attalea maripa          | Petiole Utensils & tools Hunting and fishing                                |
| San Martin de Amacayacu | Attalea maripa          | Seed Cultural Cosmetic                                                      |
| San Martin de Amacayacu | Attalea maripa          | Seed Other Miscellaneous                                                    |
| San Martin de Amacayacu | Attalea maripa          | Stem Other Miscellaneous                                                    |
| San Martin de Amacayacu | Attalea microcarpa      | Fruit Human food Food                                                       |
| San Martin de Amacayacu | Attalea microcarpa      | Spear leaf Utensils & tools Domestic utensils                               |
| San Martin de Amacayacu | Attalea peruviana       | Bract Utensils & tools Domestic utensils                                    |
| San Martin de Amacayacu | Attalea peruviana       | Entire leaf Construction Thatch                                             |
| San Martin de Amacayacu | Attalea peruviana       | Fruit Cultural Cosmetic                                                     |
| San Martin de Amacayacu | Attalea peruviana       | Fruit Cultural Personal adornment                                           |
| San Martin de Amacayacu | Attalea peruviana       | Fruit Cultural Recreational                                                 |
| San Martin de Amacayacu | Attalea peruviana       | Fruit Human food Food                                                       |
| San Martin de Amacayacu | Attalea peruviana       | Fruit Utensils & tools Labour tools                                         |
| San Martin de Amacayacu | Attalea peruviana       | Seed Human food Food                                                        |
| San Martin de Amacayacu | Attalea peruviana       | Seed Other Miscellaneous                                                    |
| San Martin de Amacayacu | Attalea peruviana       | Spear leaf Cultural Ritual                                                  |
| San Martin de Amacayacu | Attalea peruviana       | Stem Other Miscellaneous                                                    |
| San Martin de Amacayacu | Attalea plowmanii       | Entire leaf Construction Thatch                                             |
| San Martin de Amacayacu | Attalea plowmanii       | Fruit Cultural Cosmetic                                                     |
| San Martin de Amacayacu | Attalea plowmanii       | Fruit Cultural Personal adornment                                           |
| San Martin de Amacayacu | Attalea plowmanii       | Fruit Human food Food                                                       |
| San Martin de Amacayacu | Attalea plowmanii       | Seed Other Miscellaneous                                                    |
| San Martin de Amacayacu | Bactris bifida          | Entire leaf Construction Thatch                                             |
| San Martin de Amacayacu | Bactris bifida          | Entire leaf Utensils & tools Wrappers                                       |
| San Martin de Amacayacu | Bactris bifida          | Fruit Human food Food                                                       |
| San Martin de Amacayacu | Bactris bifida          | Seed Cultural Personal adornment                                            |
| San Martin de Amacayacu | Bactris bifida          | Seed Human food Food                                                        |
| San Martin de Amacayacu | Bactris brongniartii    | Fruit Animal food Fish bait                                                 |
| San Martin de Amacayacu | Bactris brongniartii    | Fruit Human food Food                                                       |
| San Martin de Amacayacu | Bactris brongniartii    | Seed Cultural Personal adornment                                            |

|                         |                        |                                                                |
|-------------------------|------------------------|----------------------------------------------------------------|
| San Martín de Amacayacu | Bactris brongniartii   | Stem Cultural Recreational                                     |
| San Martín de Amacayacu | Bactris brongniartii   | Stem Utensils & tools Hunting and fishing                      |
| San Martín de Amacayacu | Bactris brongniartii   | Stem Utensils & tools Labour tools                             |
| San Martín de Amacayacu | Bactris concinna       | Fruit Human food Food                                          |
| San Martín de Amacayacu | Bactris concinna       | Seed Cultural Personal adornment                               |
| San Martín de Amacayacu | Bactris concinna       | Stem Cultural Recreational                                     |
| San Martín de Amacayacu | Bactris concinna       | Stem Utensils & tools Hunting and fishing                      |
| San Martín de Amacayacu | Bactris concinna       | Stem Utensils & tools Labour tools                             |
| San Martín de Amacayacu | Bactris hirta          | Fruit Human food Food                                          |
| San Martín de Amacayacu | Bactris hirta          | Seed Cultural Personal adornment                               |
| San Martín de Amacayacu | Bactris hirta          | Stem Cultural Personal adornment                               |
| San Martín de Amacayacu | Bactris maraja         | Seed Cultural Personal adornment                               |
| San Martín de Amacayacu | Bactris maraja         | Stem Cultural Recreational                                     |
| San Martín de Amacayacu | Bactris maraja         | Stem Utensils & tools Hunting and fishing                      |
| San Martín de Amacayacu | Bactris riparia        | Fruit Animal food Fish bait                                    |
| San Martín de Amacayacu | Bactris riparia        | Fruit Human food Food                                          |
| San Martín de Amacayacu | Bactris riparia        | Seed Cultural Personal adornment                               |
| San Martín de Amacayacu | Bactris riparia        | Spear leaf Utensils & tools Wrappers                           |
| San Martín de Amacayacu | Bactris riparia        | Stem Utensils & tools Hunting and fishing                      |
| San Martín de Amacayacu | Bactris riparia        | Stem Utensils & tools Labour tools                             |
| San Martín de Amacayacu | Bactris simplicifrons  | Seed Cultural Personal adornment                               |
| San Martín de Amacayacu | Chamaedorea pauciflora | Entire leaf Construction Thatch                                |
| San Martín de Amacayacu | Chamaedorea pauciflora | Entire leaf Cultural Ritual                                    |
| San Martín de Amacayacu | Chamaedorea pauciflora | Entire leaf Utensils & tools Wrappers                          |
| San Martín de Amacayacu | Chamaedorea pauciflora | Flower Cultural Cosmetic                                       |
| San Martín de Amacayacu | Chamaedorea pauciflora | Flower Cultural Ritual                                         |
| San Martín de Amacayacu | Chamaedorea pauciflora | Flower Human food Food additives                               |
| San Martín de Amacayacu | Chamaedorea pauciflora | Flower Utensils & tools Other                                  |
| San Martín de Amacayacu | Chamaedorea pauciflora | Fruit Cultural Cosmetic                                        |
| San Martín de Amacayacu | Chamaedorea pauciflora | Fruit Human food Food                                          |
| San Martín de Amacayacu | Chamaedorea pauciflora | Seed Cultural Personal adornment                               |
| San Martín de Amacayacu | Chamaedorea pauciflora | Stem Utensils & tools Labour tools                             |
| San Martín de Amacayacu | Desmoncus mitis        | Seed Cultural Personal adornment                               |
| San Martín de Amacayacu | Desmoncus mitis        | Stem Cultural Personal adornment                               |
| San Martín de Amacayacu | Desmoncus mitis        | Stem Utensils & tools Domestic utensils                        |
| San Martín de Amacayacu | Desmoncus mitis        | Stem Utensils & tools Hunting and fishing                      |
| San Martín de Amacayacu | Desmoncus mitis        | Stem Utensils & tools Rope                                     |
| San Martín de Amacayacu | Desmoncus polyacanthos | Seed Cultural Personal adornment                               |
| San Martín de Amacayacu | Desmoncus polyacanthos | Stem Cultural Personal adornment                               |
| San Martín de Amacayacu | Desmoncus polyacanthos | Stem Utensils & tools Domestic utensils                        |
| San Martín de Amacayacu | Desmoncus polyacanthos | Stem Utensils & tools Rope                                     |
| San Martín de Amacayacu | Euterpe catinga        | Fruit Human food Beverages                                     |
| San Martín de Amacayacu | Euterpe catinga        | Fruit Human food Food                                          |
| San Martín de Amacayacu | Euterpe catinga        | Palm heart Human food Food                                     |
| San Martín de Amacayacu | Euterpe catinga        | Root Medicinal & veterinary Digestive system                   |
| San Martín de Amacayacu | Euterpe catinga        | Root Medicinal & veterinary Infections and infestations        |
| San Martín de Amacayacu | Euterpe catinga        | Root Medicinal & veterinary Metabolic system and nutrition     |
| San Martín de Amacayacu | Euterpe catinga        | Seed Cultural Personal adornment                               |
| San Martín de Amacayacu | Euterpe catinga        | Stem Construction Houses                                       |
| San Martín de Amacayacu | Euterpe precatória     | Entire leaf Construction Thatch                                |
| San Martín de Amacayacu | Euterpe precatória     | Entire leaf Utensils & tools Domestic utensils                 |
| San Martín de Amacayacu | Euterpe precatória     | Entire plant Cultural Ritual                                   |
| San Martín de Amacayacu | Euterpe precatória     | Fruit Animal food Fish bait                                    |
| San Martín de Amacayacu | Euterpe precatória     | Fruit Human food Beverages                                     |
| San Martín de Amacayacu | Euterpe precatória     | Fruit Human food Food                                          |
| San Martín de Amacayacu | Euterpe precatória     | Leaf sheath Utensils & tools Domestic utensils                 |
| San Martín de Amacayacu | Euterpe precatória     | Palm heart Human food Food                                     |
| San Martín de Amacayacu | Euterpe precatória     | Root Cultural Cosmetic                                         |
| San Martín de Amacayacu | Euterpe precatória     | Root Medicinal & veterinary Digestive system                   |
| San Martín de Amacayacu | Euterpe precatória     | Root Medicinal & veterinary Infections and infestations        |
| San Martín de Amacayacu | Euterpe precatória     | Root Medicinal & veterinary Metabolic system and nutrition     |
| San Martín de Amacayacu | Euterpe precatória     | Root Medicinal & veterinary Musculo-skeletal system            |
| San Martín de Amacayacu | Euterpe precatória     | Root Medicinal & veterinary Not specified at all               |
| San Martín de Amacayacu | Euterpe precatória     | Root Medicinal & veterinary Pregnancy, birth and puerperial    |
| San Martín de Amacayacu | Euterpe precatória     | Root Medicinal & veterinary Reproductive system and sex health |
| San Martín de Amacayacu | Euterpe precatória     | Root Medicinal & veterinary Respiratory system                 |
| San Martín de Amacayacu | Euterpe precatória     | Root Medicinal & veterinary Urinary system                     |
| San Martín de Amacayacu | Euterpe precatória     | Seed Cultural Personal adornment                               |
| San Martín de Amacayacu | Euterpe precatória     | Stem Construction Houses                                       |
| San Martín de Amacayacu | Euterpe precatória     | Stem Environmental Fences                                      |
| San Martín de Amacayacu | Euterpe precatória     | Stem Other Miscellaneous                                       |
| San Martín de Amacayacu | Euterpe precatória     | Stem Utensils & tools Hunting and fishing                      |
| San Martín de Amacayacu | Geonoma deversa        | Entire leaf Construction Thatch                                |
| San Martín de Amacayacu | Geonoma deversa        | Stem Utensils & tools Hunting and fishing                      |
| San Martín de Amacayacu | Geonoma laxiflora      | Entire leaf Construction Thatch                                |
| San Martín de Amacayacu | Geonoma laxiflora      | Entire leaf Utensils & tools Domestic utensils                 |
| San Martín de Amacayacu | Geonoma laxiflora      | Seed Cultural Personal adornment                               |
| San Martín de Amacayacu | Geonoma laxiflora      | Stem Cultural Personal adornment                               |
| San Martín de Amacayacu | Geonoma laxiflora      | Stem Environmental Fences                                      |
| San Martín de Amacayacu | Geonoma laxiflora      | Stem Utensils & tools Hunting and fishing                      |
| San Martín de Amacayacu | Geonoma laxiflora      | Stem Utensils & tools Labour tools                             |
| San Martín de Amacayacu | Geonoma macrostachys   | Entire leaf Construction Thatch                                |
| San Martín de Amacayacu | Geonoma macrostachys   | Entire leaf Utensils & tools Wrappers                          |
| San Martín de Amacayacu | Geonoma macrostachys   | Entire plant Environmental Ornamental                          |
| San Martín de Amacayacu | Geonoma macrostachys   | Seed Cultural Personal adornment                               |
| San Martín de Amacayacu | Geonoma maxima         | Entire leaf Construction Thatch                                |
| San Martín de Amacayacu | Geonoma maxima         | Seed Cultural Personal adornment                               |

|                         |                     |                                                                 |
|-------------------------|---------------------|-----------------------------------------------------------------|
| San Martín de Amacayacu | Geonoma maxima      | Stem Cultural Clothes and accessories                           |
| San Martín de Amacayacu | Geonoma maxima      | Stem Utensils & tools Hunting and fishing                       |
| San Martín de Amacayacu | Geonoma oligoclona  | Fruit Human food Food                                           |
| San Martín de Amacayacu | Geonoma stricta     | Entire leaf Construction Thatch                                 |
| San Martín de Amacayacu | Geonoma stricta     | Entire leaf Utensils & tools Domestic utensils                  |
| San Martín de Amacayacu | Geonoma stricta     | Entire leaf Utensils & tools Wrappers                           |
| San Martín de Amacayacu | Geonoma stricta     | Seed Cultural Personal adornment                                |
| San Martín de Amacayacu | Hyospathe elegans   | Entire leaf Medicinal & veterinary Skin and subcutaneous tissue |
| San Martín de Amacayacu | Hyospathe elegans   | Palm heart Cultural Dyes                                        |
| San Martín de Amacayacu | Hyospathe elegans   | Palm heart Medicinal & veterinary Dental health                 |
| San Martín de Amacayacu | Hyospathe elegans   | Root Utensils & tools Domestic utensils                         |
| San Martín de Amacayacu | Hyospathe elegans   | Stem Utensils & tools Domestic utensils                         |
| San Martín de Amacayacu | Hyospathe elegans   | Stem Utensils & tools Hunting and fishing                       |
| San Martín de Amacayacu | Iriarteia deltoidea | Entire leaf Construction Thatch                                 |
| San Martín de Amacayacu | Iriarteia deltoidea | Leaf sheath Utensils & tools Domestic utensils                  |
| San Martín de Amacayacu | Iriarteia deltoidea | Leaf sheath Utensils & tools Labour tools                       |
| San Martín de Amacayacu | Iriarteia deltoidea | Root Cultural Recreational                                      |
| San Martín de Amacayacu | Iriarteia deltoidea | Root Utensils & tools Domestic utensils                         |
| San Martín de Amacayacu | Iriarteia deltoidea | Root Utensils & tools Labour tools                              |
| San Martín de Amacayacu | Iriarteia deltoidea | Seed Cultural Personal adornment                                |
| San Martín de Amacayacu | Iriarteia deltoidea | Seed Cultural Recreational                                      |
| San Martín de Amacayacu | Iriarteia deltoidea | Stem Construction Houses                                        |
| San Martín de Amacayacu | Iriarteia deltoidea | Stem Construction Other                                         |
| San Martín de Amacayacu | Iriarteia deltoidea | Stem Construction Thatch                                        |
| San Martín de Amacayacu | Iriarteia deltoidea | Stem Construction Transportation                                |
| San Martín de Amacayacu | Iriarteia deltoidea | Stem Cultural Ritual                                            |
| San Martín de Amacayacu | Iriarteia deltoidea | Stem Other Miscellaneous                                        |
| San Martín de Amacayacu | Iriarteia deltoidea | Stem Utensils & tools Domestic utensils                         |
| San Martín de Amacayacu | Iriarteia deltoidea | Stem Utensils & tools Labour tools                              |
| San Martín de Amacayacu | Iriarteia deltoidea | Stem Utensils & tools Other                                     |
| San Martín de Amacayacu | Iriartella setigera | Entire leaf Construction Thatch                                 |
| San Martín de Amacayacu | Iriartella setigera | Entire plant Environmental Ornamental                           |
| San Martín de Amacayacu | Iriartella setigera | Leaf sheath Medicinal & veterinary Skin and subcutaneous tissue |
| San Martín de Amacayacu | Iriartella setigera | Leaf sheath Utensils & tools Domestic utensils                  |
| San Martín de Amacayacu | Iriartella setigera | Seed Cultural Personal adornment                                |
| San Martín de Amacayacu | Iriartella setigera | Stem Construction Houses                                        |
| San Martín de Amacayacu | Iriartella setigera | Stem Utensils & tools Domestic utensils                         |
| San Martín de Amacayacu | Itaya amicornum     | Entire leaf Construction Thatch                                 |
| San Martín de Amacayacu | Itaya amicornum     | Spear leaf Cultural Clothes and accessories                     |
| San Martín de Amacayacu | Itaya amicornum     | Stem Construction Houses                                        |
| San Martín de Amacayacu | Lepidocaryum tenue  | Entire leaf Construction Houses                                 |
| San Martín de Amacayacu | Lepidocaryum tenue  | Entire leaf Construction Thatch                                 |
| San Martín de Amacayacu | Lepidocaryum tenue  | Entire leaf Utensils & tools Wrappers                           |
| San Martín de Amacayacu | Lepidocaryum tenue  | Seed Cultural Personal adornment                                |
| San Martín de Amacayacu | Lepidocaryum tenue  | Spear leaf Utensils & tools Hunting and fishing                 |
| San Martín de Amacayacu | Manicaria martiana  | Bract Utensils & tools Domestic utensils                        |
| San Martín de Amacayacu | Manicaria martiana  | Bract Utensils & tools Hunting and fishing                      |
| San Martín de Amacayacu | Manicaria martiana  | Entire leaf Construction Thatch                                 |
| San Martín de Amacayacu | Manicaria martiana  | Entire leaf Utensils & tools Domestic utensils                  |
| San Martín de Amacayacu | Manicaria martiana  | Seed Cultural Personal adornment                                |
| San Martín de Amacayacu | Manicaria martiana  | Seed Human food Food                                            |
| San Martín de Amacayacu | Manicaria martiana  | Seed Utensils & tools Labour tools                              |
| San Martín de Amacayacu | Manicaria martiana  | Stem Construction Houses                                        |
| San Martín de Amacayacu | Manicaria saccifera | Bract Cultural Clothes and accessories                          |
| San Martín de Amacayacu | Manicaria saccifera | Bract Utensils & tools Domestic utensils                        |
| San Martín de Amacayacu | Manicaria saccifera | Bract Utensils & tools Hunting and fishing                      |
| San Martín de Amacayacu | Manicaria saccifera | Entire leaf Construction Thatch                                 |
| San Martín de Amacayacu | Manicaria saccifera | Entire leaf Utensils & tools Domestic utensils                  |
| San Martín de Amacayacu | Manicaria saccifera | Seed Cultural Personal adornment                                |
| San Martín de Amacayacu | Manicaria saccifera | Seed Human food Food                                            |
| San Martín de Amacayacu | Manicaria saccifera | Spear leaf Cultural Ritual                                      |
| San Martín de Amacayacu | Manicaria saccifera | Spear leaf Utensils & tools Hunting and fishing                 |
| San Martín de Amacayacu | Manicaria saccifera | Stem Construction Houses                                        |
| San Martín de Amacayacu | Mauritia flexuosa   | Entire leaf Construction Thatch                                 |
| San Martín de Amacayacu | Mauritia flexuosa   | Entire leaf Cultural Ritual                                     |
| San Martín de Amacayacu | Mauritia flexuosa   | Fruit Animal food Fish bait                                     |
| San Martín de Amacayacu | Mauritia flexuosa   | Fruit Human food Beverages                                      |
| San Martín de Amacayacu | Mauritia flexuosa   | Fruit Human food Food                                           |
| San Martín de Amacayacu | Mauritia flexuosa   | Fruit Human food Oils                                           |
| San Martín de Amacayacu | Mauritia flexuosa   | Petiole Construction Transportation                             |
| San Martín de Amacayacu | Mauritia flexuosa   | Petiole Cultural Recreational                                   |
| San Martín de Amacayacu | Mauritia flexuosa   | Petiole Cultural Ritual                                         |
| San Martín de Amacayacu | Mauritia flexuosa   | Petiole Utensils & tools Domestic utensils                      |
| San Martín de Amacayacu | Mauritia flexuosa   | Petiole Utensils & tools Other                                  |
| San Martín de Amacayacu | Mauritia flexuosa   | Seed Cultural Personal adornment                                |
| San Martín de Amacayacu | Mauritia flexuosa   | Spear leaf Cultural Clothes and accessories                     |
| San Martín de Amacayacu | Mauritia flexuosa   | Spear leaf Cultural Dyes                                        |
| San Martín de Amacayacu | Mauritia flexuosa   | Spear leaf Cultural Ritual                                      |
| San Martín de Amacayacu | Mauritia flexuosa   | Spear leaf Utensils & tools Domestic utensils                   |
| San Martín de Amacayacu | Mauritia flexuosa   | Stem Other Miscellaneous                                        |
| San Martín de Amacayacu | Mauritiella armata  | Entire leaf Construction Thatch                                 |
| San Martín de Amacayacu | Mauritiella armata  | Fruit Human food Beverages                                      |
| San Martín de Amacayacu | Mauritiella armata  | Fruit Human food Food                                           |
| San Martín de Amacayacu | Mauritiella armata  | Seed Cultural Personal adornment                                |
| San Martín de Amacayacu | Mauritiella armata  | Stem Construction Houses                                        |
| San Martín de Amacayacu | Mauritiella armata  | Stem Construction Thatch                                        |
| San Martín de Amacayacu | Mauritiella armata  | Stem Environmental Fences                                       |

|                         |                       |                                                   |
|-------------------------|-----------------------|---------------------------------------------------|
| San Martín de Amacayacu | Mauritiella armata    | Stem Other Miscellaneous                          |
| San Martín de Amacayacu | Mauritiella armata    | Stem Utensils & tools Hunting and fishing         |
| San Martín de Amacayacu | Oenocarpus bataua     | Entire leaf Construction Thatch                   |
| San Martín de Amacayacu | Oenocarpus bataua     | Entire leaf Utensils & tools Domestic utensils    |
| San Martín de Amacayacu | Oenocarpus bataua     | Entire leaf Utensils & tools Hunting and fishing  |
| San Martín de Amacayacu | Oenocarpus bataua     | Entire leaf Utensils & tools Wrappers             |
| San Martín de Amacayacu | Oenocarpus bataua     | Fruit Human food Beverages                        |
| San Martín de Amacayacu | Oenocarpus bataua     | Fruit Human food Food                             |
| San Martín de Amacayacu | Oenocarpus bataua     | Fruit Human food Oils                             |
| San Martín de Amacayacu | Oenocarpus bataua     | Fruit Medicinal & veterinary Not specified at all |
| San Martín de Amacayacu | Oenocarpus bataua     | Leaf sheath Utensils & tools Hunting and fishing  |
| San Martín de Amacayacu | Oenocarpus bataua     | Palm heart Medicinal & veterinary Poisonings      |
| San Martín de Amacayacu | Oenocarpus bataua     | Root Medicinal & veterinary Not specified at all  |
| San Martín de Amacayacu | Oenocarpus bataua     | Seed Cultural Personal adornment                  |
| San Martín de Amacayacu | Oenocarpus bataua     | Seed Medicinal & veterinary Digestive system      |
| San Martín de Amacayacu | Oenocarpus bataua     | Seed Medicinal & veterinary Poisonings            |
| San Martín de Amacayacu | Oenocarpus bataua     | Seed Medicinal & veterinary Respiratory system    |
| San Martín de Amacayacu | Oenocarpus bataua     | Spear leaf Utensils & tools Hunting and fishing   |
| San Martín de Amacayacu | Oenocarpus bataua     | Stem Other Miscellaneous                          |
| San Martín de Amacayacu | Oenocarpus bataua     | Stem Utensils & tools Labour tools                |
| San Martín de Amacayacu | Oenocarpus mapora     | Entire leaf Construction Thatch                   |
| San Martín de Amacayacu | Oenocarpus mapora     | Entire leaf Utensils & tools Domestic utensils    |
| San Martín de Amacayacu | Oenocarpus mapora     | Fruit Human food Beverages                        |
| San Martín de Amacayacu | Oenocarpus mapora     | Fruit Human food Food                             |
| San Martín de Amacayacu | Oenocarpus mapora     | Fruit Human food Oils                             |
| San Martín de Amacayacu | Oenocarpus mapora     | Seed Cultural Personal adornment                  |
| San Martín de Amacayacu | Oenocarpus mapora     | Spear leaf Cultural Ritual                        |
| San Martín de Amacayacu | Oenocarpus mapora     | Stem Construction Houses                          |
| San Martín de Amacayacu | Oenocarpus mapora     | Stem Environmental Fences                         |
| San Martín de Amacayacu | Oenocarpus mapora     | Stem Other Miscellaneous                          |
| San Martín de Amacayacu | Oenocarpus mapora     | Stem Utensils & tools Domestic utensils           |
| San Martín de Amacayacu | Oenocarpus mapora     | Stem Utensils & tools Hunting and fishing         |
| San Martín de Amacayacu | Oenocarpus mapora     | Stem Utensils & tools Labour tools                |
| San Martín de Amacayacu | Phytelphas macrocarpa | Entire leaf Construction Thatch                   |
| San Martín de Amacayacu | Phytelphas macrocarpa | Entire leaf Utensils & tools Domestic utensils    |
| San Martín de Amacayacu | Phytelphas macrocarpa | Entire leaf Utensils & tools Hunting and fishing  |
| San Martín de Amacayacu | Phytelphas macrocarpa | Seed Cultural Clothes and accessories             |
| San Martín de Amacayacu | Phytelphas macrocarpa | Seed Cultural Personal adornment                  |
| San Martín de Amacayacu | Phytelphas macrocarpa | Seed Human food Beverages                         |
| San Martín de Amacayacu | Phytelphas macrocarpa | Seed Human food Food                              |
| San Martín de Amacayacu | Phytelphas macrocarpa | Seed Medicinal & veterinary Digestive system      |
| San Martín de Amacayacu | Phytelphas macrocarpa | Spear leaf Cultural Ritual                        |
| San Martín de Amacayacu | Socratea exorrhiza    | Entire leaf Construction Thatch                   |
| San Martín de Amacayacu | Socratea exorrhiza    | Fruit Animal food Fish bait                       |
| San Martín de Amacayacu | Socratea exorrhiza    | Leaf sheath Utensils & tools Domestic utensils    |
| San Martín de Amacayacu | Socratea exorrhiza    | Leaf sheath Utensils & tools Wrappers             |
| San Martín de Amacayacu | Socratea exorrhiza    | Root Cultural Ritual                              |
| San Martín de Amacayacu | Socratea exorrhiza    | Root Utensils & tools Domestic utensils           |
| San Martín de Amacayacu | Socratea exorrhiza    | Root Utensils & tools Labour tools                |
| San Martín de Amacayacu | Socratea exorrhiza    | Seed Cultural Personal adornment                  |
| San Martín de Amacayacu | Socratea exorrhiza    | Stem Construction Houses                          |
| San Martín de Amacayacu | Socratea exorrhiza    | Stem Construction Other                           |
| San Martín de Amacayacu | Socratea exorrhiza    | Stem Construction Thatch                          |
| San Martín de Amacayacu | Socratea exorrhiza    | Stem Environmental Fences                         |
| San Martín de Amacayacu | Socratea exorrhiza    | Stem Other Miscellaneous                          |
| San Martín de Amacayacu | Socratea exorrhiza    | Stem Utensils & tools Hunting and fishing         |
| San Martín              | Aphandra natalia      | Entire leaf Construction Thatch                   |
| San Martín              | Aphandra natalia      | Fruit Human food Food                             |
| San Martín              | Aphandra natalia      | Leaf sheath Utensils & tools Domestic utensils    |
| San Martín              | Aphandra natalia      | Seed Human food Food                              |
| San Martín              | Astrocaryum chambira  | Fruit Human food Food                             |
| San Martín              | Astrocaryum chambira  | Leaf rachis Utensils & tools Domestic utensils    |
| San Martín              | Astrocaryum chambira  | Palm heart Animal food Fish bait                  |
| San Martín              | Astrocaryum chambira  | Palm heart Human food Food                        |
| San Martín              | Astrocaryum chambira  | Seed Human food Food                              |
| San Martín              | Astrocaryum chambira  | Spear leaf Cultural Clothes and accessories       |
| San Martín              | Astrocaryum chambira  | Spear leaf Cultural Personal adornment            |
| San Martín              | Astrocaryum chambira  | Spear leaf Utensils & tools Domestic utensils     |
| San Martín              | Astrocaryum chambira  | Spear leaf Utensils & tools Hunting and fishing   |
| San Martín              | Astrocaryum chambira  | Spear leaf Utensils & tools Other                 |
| San Martín              | Astrocaryum chambira  | Spear leaf Utensils & tools Rope                  |
| San Martín              | Astrocaryum chambira  | Stem Construction Houses                          |
| San Martín              | Astrocaryum jauari    | Fruit Cultural Personal adornment                 |
| San Martín              | Astrocaryum jauari    | Fruit Human food Food                             |
| San Martín              | Astrocaryum jauari    | Leaf rachis Utensils & tools Domestic utensils    |
| San Martín              | Astrocaryum jauari    | Palm heart Animal food Fish bait                  |
| San Martín              | Astrocaryum jauari    | Seed Human food Food                              |
| San Martín              | Astrocaryum jauari    | Spear leaf Cultural Clothes and accessories       |
| San Martín              | Astrocaryum jauari    | Spear leaf Utensils & tools Domestic utensils     |
| San Martín              | Astrocaryum jauari    | Stem Construction Houses                          |
| San Martín              | Astrocaryum jauari    | Stem Construction Other                           |
| San Martín              | Astrocaryum jauari    | Stem Environmental Fences                         |
| San Martín              | Attalea bassleriana   | Bract Cultural Recreational                       |
| San Martín              | Attalea bassleriana   | Bract Fuel Fire starter                           |
| San Martín              | Attalea bassleriana   | Bract Fuel Lighting                               |
| San Martín              | Attalea bassleriana   | Bract Utensils & tools Domestic utensils          |
| San Martín              | Attalea bassleriana   | Bract Utensils & tools Other                      |

|            |                        |                                                                       |
|------------|------------------------|-----------------------------------------------------------------------|
| San Martin | Attalea bassleriana    | Entire leaf Construction Thatch                                       |
| San Martin | Attalea bassleriana    | Fruit Human food Food                                                 |
| San Martin | Attalea bassleriana    | Leaf rachis Utensils & tools Hunting and fishing                      |
| San Martin | Attalea bassleriana    | Palm heart Human food Food                                            |
| San Martin | Attalea bassleriana    | Root Cultural Cosmetic                                                |
| San Martin | Attalea bassleriana    | Seed Cultural Cosmetic                                                |
| San Martin | Attalea bassleriana    | Seed Human food Food                                                  |
| San Martin | Attalea bassleriana    | Seed Other Miscellaneous                                              |
| San Martin | Attalea bassleriana    | Spear leaf Construction Houses                                        |
| San Martin | Attalea bassleriana    | Spear leaf Construction Thatch                                        |
| San Martin | Attalea bassleriana    | Spear leaf Cultural Clothes and accessories                           |
| San Martin | Attalea bassleriana    | Spear leaf Utensils & tools Domestic utensils                         |
| San Martin | Attalea bassleriana    | Spear leaf Utensils & tools Hunting and fishing                       |
| San Martin | Attalea bassleriana    | Stem Other Miscellaneous                                              |
| San Martin | Attalea maripa         | Entire leaf Construction Thatch                                       |
| San Martin | Attalea maripa         | Fruit Human food Food                                                 |
| San Martin | Attalea maripa         | Leaf rachis Utensils & tools Domestic utensils                        |
| San Martin | Attalea maripa         | Leaf rachis Utensils & tools Hunting and fishing                      |
| San Martin | Attalea maripa         | Leaf rachis Utensils & tools Labour tools                             |
| San Martin | Attalea maripa         | Petiole Utensils & tools Hunting and fishing                          |
| San Martin | Attalea maripa         | Seed Human food Food                                                  |
| San Martin | Attalea microcarpa     | Entire leaf Construction Thatch                                       |
| San Martin | Attalea microcarpa     | Fruit Human food Food                                                 |
| San Martin | Attalea microcarpa     | Seed Human food Food                                                  |
| San Martin | Attalea microcarpa     | Seed Other Miscellaneous                                              |
| San Martin | Attalea peruviana      | Bract Cultural Recreational                                           |
| San Martin | Attalea peruviana      | Entire leaf Construction Thatch                                       |
| San Martin | Attalea peruviana      | Fruit Human food Food                                                 |
| San Martin | Attalea peruviana      | Seed Human food Food                                                  |
| San Martin | Attalea peruviana      | Seed Other Miscellaneous                                              |
| San Martin | Attalea peruviana      | Spear leaf Construction Houses                                        |
| San Martin | Attalea peruviana      | Spear leaf Utensils & tools Domestic utensils                         |
| San Martin | Attalea tessmannii     | Entire leaf Construction Thatch                                       |
| San Martin | Attalea tessmannii     | Fruit Human food Food                                                 |
| San Martin | Attalea tessmannii     | Seed Human food Food                                                  |
| San Martin | Attalea tessmannii     | Spear leaf Utensils & tools Domestic utensils                         |
| San Martin | Bactris bidentula      | Stem Construction Houses                                              |
| San Martin | Bactris bifida         | Fruit Human food Food                                                 |
| San Martin | Bactris brongniartii   | Fruit Human food Food                                                 |
| San Martin | Bactris brongniartii   | Stem Construction Houses                                              |
| San Martin | Bactris brongniartii   | Stem Environmental Fences                                             |
| San Martin | Bactris concinna       | Fruit Human food Food                                                 |
| San Martin | Bactris concinna       | Stem Environmental Fences                                             |
| San Martin | Bactris maraja         | Fruit Human food Food                                                 |
| San Martin | Bactris maraja         | Stem Construction Houses                                              |
| San Martin | Bactris maraja         | Stem Utensils & tools Hunting and fishing                             |
| San Martin | Bactris riparia        | Fruit Animal food Fish bait                                           |
| San Martin | Bactris riparia        | Fruit Human food Food                                                 |
| San Martin | Bactris riparia        | Stem Construction Houses                                              |
| San Martin | Bactris riparia        | Stem Environmental Fences                                             |
| San Martin | Desmoncus mitis        | Stem Utensils & tools Domestic utensils                               |
| San Martin | Desmoncus mitis        | Stem Utensils & tools Other                                           |
| San Martin | Desmoncus polyacanthos | Stem Utensils & tools Domestic utensils                               |
| San Martin | Desmoncus polyacanthos | Stem Utensils & tools Other                                           |
| San Martin | Desmoncus polyacanthos | Stem Utensils & tools Rope                                            |
| San Martin | Euterpe precatoria     | Entire leaf Construction Thatch                                       |
| San Martin | Euterpe precatoria     | Entire plant Cultural Ritual                                          |
| San Martin | Euterpe precatoria     | Fruit Human food Beverages                                            |
| San Martin | Euterpe precatoria     | Fruit Human food Food                                                 |
| San Martin | Euterpe precatoria     | Fruit Medicinal & veterinary Blood and Cardio-vascular system         |
| San Martin | Euterpe precatoria     | Palm heart Human food Food                                            |
| San Martin | Euterpe precatoria     | Root Cultural Cosmetic                                                |
| San Martin | Euterpe precatoria     | Root Medicinal & veterinary Blood and Cardio-vascular system          |
| San Martin | Euterpe precatoria     | Root Medicinal & veterinary Digestive system                          |
| San Martin | Euterpe precatoria     | Root Medicinal & veterinary Endocrine system                          |
| San Martin | Euterpe precatoria     | Root Medicinal & veterinary General Ailments with Unspecific Symptoms |
| San Martin | Euterpe precatoria     | Root Medicinal & veterinary Infections and infestations               |
| San Martin | Euterpe precatoria     | Root Medicinal & veterinary Musculo-skeletal system                   |
| San Martin | Euterpe precatoria     | Root Medicinal & veterinary Pregnancy, birth and puerperial           |
| San Martin | Euterpe precatoria     | Root Medicinal & veterinary Sensory system                            |
| San Martin | Euterpe precatoria     | Root Medicinal & veterinary Urinary system                            |
| San Martin | Euterpe precatoria     | Seed Cultural Personal adornment                                      |
| San Martin | Euterpe precatoria     | Spear leaf Cultural Clothes and accessories                           |
| San Martin | Euterpe precatoria     | Spear leaf Utensils & tools Domestic utensils                         |
| San Martin | Euterpe precatoria     | Stem Construction Houses                                              |
| San Martin | Geonoma brongniartii   | Entire leaf Construction Thatch                                       |
| San Martin | Geonoma deversa        | Entire leaf Construction Thatch                                       |
| San Martin | Hyospathe elegans      | Spear leaf Cultural Ritual                                            |
| San Martin | Iriartea deltoidea     | Entire leaf Construction Thatch                                       |
| San Martin | Iriartea deltoidea     | Leaf sheath Utensils & tools Labour tools                             |
| San Martin | Iriartea deltoidea     | Palm heart Human food Food                                            |
| San Martin | Iriartea deltoidea     | Seed Cultural Personal adornment                                      |
| San Martin | Iriartea deltoidea     | Spear leaf Utensils & tools Wrappers                                  |
| San Martin | Iriartea deltoidea     | Stem Construction Houses                                              |
| San Martin | Iriartea deltoidea     | Stem Construction Transportation                                      |
| San Martin | Lepidocaryum tenue     | Entire leaf Construction Thatch                                       |
| San Martin | Mauritia flexuosa      | Entire leaf Construction Thatch                                       |



|            |                          |                                                          |
|------------|--------------------------|----------------------------------------------------------|
| San Martin | Mauritia flexuosa        | Fruit Human food Beverages                               |
| San Martin | Mauritia flexuosa        | Fruit Human food Food                                    |
| San Martin | Mauritia flexuosa        | Leaf rachis Utensils & tools Domestic utensils           |
| San Martin | Mauritia flexuosa        | Petiole Construction Houses                              |
| San Martin | Mauritia flexuosa        | Petiole Utensils & tools Domestic utensils               |
| San Martin | Mauritia flexuosa        | Petiole Utensils & tools Hunting and fishing             |
| San Martin | Mauritia flexuosa        | Spear leaf Cultural Clothes and accessories              |
| San Martin | Mauritia flexuosa        | Spear leaf Utensils & tools Domestic utensils            |
| San Martin | Mauritia flexuosa        | Spear leaf Utensils & tools Rope                         |
| San Martin | Mauritia flexuosa        | Stem Construction Bridges                                |
| San Martin | Mauritia flexuosa        | Stem Construction Houses                                 |
| San Martin | Mauritia flexuosa        | Stem Construction Transportation                         |
| San Martin | Mauritia flexuosa        | Stem Other Miscellaneous                                 |
| San Martin | Mauritiella armata       | Entire leaf Construction Thatch                          |
| San Martin | Mauritiella armata       | Fruit Human food Food                                    |
| San Martin | Mauritiella armata       | Stem Construction Houses                                 |
| San Martin | Mauritiella armata       | Stem Construction Thatch                                 |
| San Martin | Mauritiella armata       | Stem Environmental Fences                                |
| San Martin | Oenocarpus bataua        | Entire leaf Construction Thatch                          |
| San Martin | Oenocarpus bataua        | Fruit Cultural Cosmetic                                  |
| San Martin | Oenocarpus bataua        | Fruit Human food Beverages                               |
| San Martin | Oenocarpus bataua        | Fruit Human food Food                                    |
| San Martin | Oenocarpus bataua        | Fruit Human food Oils                                    |
| San Martin | Oenocarpus bataua        | Palm heart Human food Food                               |
| San Martin | Oenocarpus bataua        | Stem Other Miscellaneous                                 |
| San Martin | Oenocarpus mapora        | Entire leaf Construction Thatch                          |
| San Martin | Oenocarpus mapora        | Entire plant Cultural Ritual                             |
| San Martin | Oenocarpus mapora        | Fruit Cultural Personal adornment                        |
| San Martin | Oenocarpus mapora        | Fruit Human food Beverages                               |
| San Martin | Oenocarpus mapora        | Fruit Human food Food                                    |
| San Martin | Oenocarpus mapora        | Leaf rachis Utensils & tools Domestic utensils           |
| San Martin | Oenocarpus mapora        | Spear leaf Cultural Clothes and accessories              |
| San Martin | Oenocarpus mapora        | Spear leaf Utensils & tools Domestic utensils            |
| San Martin | Oenocarpus mapora        | Stem Construction Houses                                 |
| San Martin | Phytelephas macrocarpa   | Entire leaf Construction Thatch                          |
| San Martin | Phytelephas macrocarpa   | Fruit Human food Food                                    |
| San Martin | Phytelephas macrocarpa   | Leaf rachis Construction Thatch                          |
| San Martin | Phytelephas macrocarpa   | Seed Cultural Other                                      |
| San Martin | Phytelephas macrocarpa   | Seed Cultural Personal adornment                         |
| San Martin | Phytelephas macrocarpa   | Seed Human food Food                                     |
| San Martin | Phytelephas macrocarpa   | Seed Medicinal & veterinary Sensory system               |
| San Martin | Phytelephas macrocarpa   | Spear leaf Cultural Clothes and accessories              |
| San Martin | Phytelephas macrocarpa   | Spear leaf Utensils & tools Domestic utensils            |
| San Martin | Socratea exorrhiza       | Entire leaf Construction Thatch                          |
| San Martin | Socratea exorrhiza       | Palm heart Human food Food                               |
| San Martin | Socratea exorrhiza       | Root Medicinal & veterinary Poisonings                   |
| San Martin | Socratea exorrhiza       | Root Medicinal & veterinary Skin and subcutaneous tissue |
| San Martin | Socratea exorrhiza       | Root Utensils & tools Domestic utensils                  |
| San Martin | Socratea exorrhiza       | Seed Cultural Personal adornment                         |
| San Martin | Socratea exorrhiza       | Seed Human food Food                                     |
| San Martin | Socratea exorrhiza       | Stem Construction Houses                                 |
| San Martin | Socratea exorrhiza       | Stem Construction Thatch                                 |
| San Martin | Socratea exorrhiza       | Stem Utensils & tools Domestic utensils                  |
| San Martin | Socratea exorrhiza       | Stem Utensils & tools Hunting and fishing                |
| San Martin | Wettinia augusta         | Fruit Human food Food                                    |
| San Martin | Wettinia augusta         | Stem Construction Houses                                 |
| San Martin | Wettinia augusta         | Stem Construction Thatch                                 |
| San Martin | Wettinia augusta         | Stem Utensils & tools Hunting and fishing                |
| San Martin | Wettinia drudei          | Stem Environmental Fences                                |
| San Martin | Wettinia drudei          | Stem Utensils & tools Domestic utensils                  |
| San Isidro | Aiphanes horrida         | Fruit Human food Food                                    |
| San Isidro | Aiphanes horrida         | Seed Human food Food                                     |
| San Isidro | Attalea princeps         | Bract Cultural Recreational                              |
| San Isidro | Attalea princeps         | Entire leaf Construction Thatch                          |
| San Isidro | Attalea princeps         | Fruit Human food Food                                    |
| San Isidro | Attalea princeps         | Leaf rachis Utensils & tools Domestic utensils           |
| San Isidro | Attalea princeps         | Palm heart Human food Food                               |
| San Isidro | Attalea princeps         | Root Medicinal & veterinary Respiratory system           |
| San Isidro | Attalea princeps         | Seed Cultural Cosmetic                                   |
| San Isidro | Attalea princeps         | Seed Human food Food                                     |
| San Isidro | Attalea princeps         | Spear leaf Cultural Clothes and accessories              |
| San Isidro | Attalea princeps         | Spear leaf Utensils & tools Domestic utensils            |
| San Isidro | Attalea princeps         | Stem Other Miscellaneous                                 |
| San Isidro | Bactris concinna         | Fruit Human food Food                                    |
| San Isidro | Bactris maraja           | Fruit Human food Food                                    |
| San Isidro | Chamaedorea angustisecta | Flower Cultural Cosmetic                                 |
| San Isidro | Chamaedorea angustisecta | Flower Medicinal & veterinary Respiratory system         |
| San Isidro | Chamaedorea angustisecta | Fruit Human food Food                                    |
| San Isidro | Euterpe precatoria       | Entire leaf Construction Thatch                          |
| San Isidro | Euterpe precatoria       | Fruit Human food Beverages                               |
| San Isidro | Euterpe precatoria       | Palm heart Human food Food                               |
| San Isidro | Euterpe precatoria       | Root Medicinal & veterinary Urinary system               |
| San Isidro | Euterpe precatoria       | Spear leaf Utensils & tools Domestic utensils            |
| San Isidro | Euterpe precatoria       | Stem Construction Houses                                 |
| San Isidro | Euterpe precatoria       | Stem Utensils & tools Domestic utensils                  |
| San Isidro | Geonoma deversa          | Entire leaf Construction Thatch                          |
| San Isidro | Iriarteia deltoidea      | Entire leaf Construction Thatch                          |

|             |                        |                                                                        |
|-------------|------------------------|------------------------------------------------------------------------|
| San Isidro  | Iriartea deltoidea     | Palm heart Human food Food                                             |
| San Isidro  | Iriartea deltoidea     | Stem Construction Houses                                               |
| San Isidro  | Mauritia flexuosa      | Entire leaf Construction Thatch                                        |
| San Isidro  | Mauritia flexuosa      | Fruit Human food Food                                                  |
| San Isidro  | Mauritia flexuosa      | Spear leaf Cultural Clothes and accessories                            |
| San Isidro  | Oenocarpus bataua      | Entire leaf Construction Thatch                                        |
| San Isidro  | Oenocarpus bataua      | Fruit Human food Beverages                                             |
| San Isidro  | Oenocarpus bataua      | Fruit Human food Oils                                                  |
| San Isidro  | Oenocarpus bataua      | Palm heart Human food Food                                             |
| San Isidro  | Oenocarpus bataua      | Spear leaf Utensils & tools Domestic utensils                          |
| San Isidro  | Oenocarpus bataua      | Stem Other Miscellaneous                                               |
| San Isidro  | Oenocarpus mapora      | Entire leaf Construction Thatch                                        |
| San Isidro  | Oenocarpus mapora      | Fruit Human food Beverages                                             |
| San Isidro  | Phytelephas macrocarpa | Entire leaf Construction Thatch                                        |
| San Isidro  | Phytelephas macrocarpa | Fruit Human food Food                                                  |
| San Isidro  | Phytelephas macrocarpa | Seed Cultural Personal adornment                                       |
| San Isidro  | Phytelephas macrocarpa | Seed Human food Food                                                   |
| San Isidro  | Socratea exorrhiza     | Seed Cultural Personal adornment                                       |
| San Isidro  | Socratea exorrhiza     | Stem Construction Houses                                               |
| San Isidro  | Socratea exorrhiza     | Stem Utensils & tools Domestic utensils                                |
| San Benito  | Aiphanes horrida       | Seed Human food Food                                                   |
| San Benito  | Bactris concinna       | Fruit Human food Food                                                  |
| San Benito  | Bactris concinna       | Stem Cultural Recreational                                             |
| San Benito  | Bactris major          | Fruit Human food Food                                                  |
| San Benito  | Bactris major          | Stem Cultural Recreational                                             |
| San Benito  | Euterpe precatoria     | Entire leaf Construction Thatch                                        |
| San Benito  | Euterpe precatoria     | Fruit Human food Beverages                                             |
| San Benito  | Euterpe precatoria     | Palm heart Human food Food                                             |
| San Benito  | Euterpe precatoria     | Root Medicinal & veterinary Infections and infestations                |
| San Benito  | Geonoma brongniartii   | Entire leaf Construction Thatch                                        |
| San Benito  | Geonoma brongniartii   | Seed Human food Food                                                   |
| San Benito  | Geonoma brongniartii   | Spear leaf Utensils & tools Wrappers                                   |
| San Benito  | Geonoma deversa        | Entire leaf Construction Thatch                                        |
| San Benito  | Geonoma deversa        | Seed Human food Food                                                   |
| San Benito  | Geonoma deversa        | Stem Utensils & tools Domestic utensils                                |
| San Benito  | Geonoma macrostachys   | Entire leaf Construction Thatch                                        |
| San Benito  | Geonoma macrostachys   | Seed Human food Food                                                   |
| San Benito  | Iriartea deltoidea     | Entire leaf Construction Thatch                                        |
| San Benito  | Iriartea deltoidea     | Entire leaf Utensils & tools Domestic utensils                         |
| San Benito  | Iriartea deltoidea     | Fruit Cultural Recreational                                            |
| San Benito  | Iriartea deltoidea     | Leaf rachis Utensils & tools Domestic utensils                         |
| San Benito  | Iriartea deltoidea     | Leaf sheath Utensils & tools Domestic utensils                         |
| San Benito  | Iriartea deltoidea     | Palm heart Human food Food                                             |
| San Benito  | Iriartea deltoidea     | Root Cultural Ritual                                                   |
| San Benito  | Iriartea deltoidea     | Seed Cultural Personal adornment                                       |
| San Benito  | Iriartea deltoidea     | Seed Human food Food                                                   |
| San Benito  | Iriartea deltoidea     | Stem Construction Houses                                               |
| San Benito  | Iriartea deltoidea     | Stem Construction Transportation                                       |
| San Benito  | Iriartea deltoidea     | Stem Fuel Firewood                                                     |
| San Benito  | Iriartea deltoidea     | Stem Other Miscellaneous                                               |
| San Benito  | Iriartea deltoidea     | Stem Utensils & tools Domestic utensils                                |
| San Benito  | Mauritia flexuosa      | Fruit Human food Food                                                  |
| San Benito  | Oenocarpus bataua      | Entire leaf Construction Thatch                                        |
| San Benito  | Oenocarpus bataua      | Fruit Cultural Cosmetic                                                |
| San Benito  | Oenocarpus bataua      | Fruit Human food Beverages                                             |
| San Benito  | Oenocarpus bataua      | Fruit Human food Oils                                                  |
| San Benito  | Oenocarpus bataua      | Fruit Medicinal & veterinary General Ailments with Unspecific Symptoms |
| San Benito  | Oenocarpus bataua      | Leaf rachis Utensils & tools Domestic utensils                         |
| San Benito  | Oenocarpus bataua      | Palm heart Human food Food                                             |
| San Benito  | Oenocarpus bataua      | Root Medicinal & veterinary Urinary system                             |
| San Benito  | Oenocarpus bataua      | Stem Construction Houses                                               |
| San Benito  | Oenocarpus bataua      | Stem Other Miscellaneous                                               |
| San Benito  | Socratea exorrhiza     | Entire leaf Construction Thatch                                        |
| San Benito  | Socratea exorrhiza     | Fruit Human food Food                                                  |
| San Benito  | Socratea exorrhiza     | Leaf rachis Utensils & tools Domestic utensils                         |
| San Benito  | Socratea exorrhiza     | Root Utensils & tools Domestic utensils                                |
| San Benito  | Socratea exorrhiza     | Seed Cultural Personal adornment                                       |
| San Benito  | Socratea exorrhiza     | Seed Human food Food                                                   |
| San Benito  | Socratea exorrhiza     | Stem Construction Houses                                               |
| San Benito  | Socratea exorrhiza     | Stem Fuel Firewood                                                     |
| San Benito  | Socratea exorrhiza     | Stem Utensils & tools Domestic utensils                                |
| San Benito  | Socratea exorrhiza     | Stem Utensils & tools Labour tools                                     |
| San Antonio | Aiphanes horrida       | Seed Human food Food                                                   |
| San Antonio | Attalea princeps       | Bract Cultural Recreational                                            |
| San Antonio | Attalea princeps       | Entire leaf Construction Thatch                                        |
| San Antonio | Attalea princeps       | Fruit Human food Food                                                  |
| San Antonio | Attalea princeps       | Leaf rachis Utensils & tools Domestic utensils                         |
| San Antonio | Attalea princeps       | Palm heart Human food Food                                             |
| San Antonio | Attalea princeps       | Seed Cultural Cosmetic                                                 |
| San Antonio | Attalea princeps       | Seed Human food Food                                                   |
| San Antonio | Attalea princeps       | Seed Medicinal & veterinary General Ailments with Unspecific Symptoms  |
| San Antonio | Attalea princeps       | Spear leaf Utensils & tools Domestic utensils                          |
| San Antonio | Attalea princeps       | Stem Other Miscellaneous                                               |
| San Antonio | Bactris chaveziae      | Fruit Human food Food                                                  |
| San Antonio | Bactris major          | Fruit Human food Food                                                  |
| San Antonio | Bactris major          | Stem Cultural Recreational                                             |
| San Antonio | Euterpe precatoria     | Fruit Human food Beverages                                             |

|                  |                          |                                                                        |
|------------------|--------------------------|------------------------------------------------------------------------|
| San Antonio      | Euterpe precatoria       | Root Medicinal & veterinary Urinary system                             |
| San Antonio      | Euterpe precatoria       | Stem Construction Houses                                               |
| San Antonio      | Geonoma brongniartii     | Entire leaf Construction Thatch                                        |
| San Antonio      | Geonoma deversa          | Entire leaf Construction Thatch                                        |
| San Antonio      | Geonoma deversa          | Stem Utensils & tools Domestic utensils                                |
| San Antonio      | Geonoma macrostachys     | Entire leaf Construction Thatch                                        |
| San Antonio      | Iriartea deltoidea       | Fruit Cultural Recreational                                            |
| San Antonio      | Iriartea deltoidea       | Leaf rachis Utensils & tools Domestic utensils                         |
| San Antonio      | Iriartea deltoidea       | Leaf sheath Utensils & tools Domestic utensils                         |
| San Antonio      | Iriartea deltoidea       | Palm heart Human food Food                                             |
| San Antonio      | Iriartea deltoidea       | Stem Construction Houses                                               |
| San Antonio      | Iriartea deltoidea       | Stem Other Miscellaneous                                               |
| San Antonio      | Iriartea deltoidea       | Stem Utensils & tools Domestic utensils                                |
| San Antonio      | Mauritia flexuosa        | Fruit Human food Food                                                  |
| San Antonio      | Oenocarpus bataua        | Fruit Cultural Cosmetic                                                |
| San Antonio      | Oenocarpus bataua        | Fruit Human food Beverages                                             |
| San Antonio      | Oenocarpus bataua        | Fruit Medicinal & veterinary General Ailments with Unspecific Symptoms |
| San Antonio      | Oenocarpus bataua        | Leaf rachis Utensils & tools Domestic utensils                         |
| San Antonio      | Oenocarpus bataua        | Stem Other Miscellaneous                                               |
| San Antonio      | Socratea exorrhiza       | Leaf rachis Utensils & tools Domestic utensils                         |
| San Antonio      | Socratea exorrhiza       | Stem Construction Houses                                               |
| San Antonio      | Socratea exorrhiza       | Stem Utensils & tools Domestic utensils                                |
| Puerto Yaminahua | Aiphanes horrida         | Seed Human food Food                                                   |
| Puerto Yaminahua | Bactris concinna         | Fruit Human food Food                                                  |
| Puerto Yaminahua | Euterpe precatoria       | Entire leaf Construction Thatch                                        |
| Puerto Yaminahua | Euterpe precatoria       | Fruit Human food Beverages                                             |
| Puerto Yaminahua | Euterpe precatoria       | Palm heart Human food Food                                             |
| Puerto Yaminahua | Euterpe precatoria       | Root Medicinal & veterinary Blood and Cardio-vascular system           |
| Puerto Yaminahua | Euterpe precatoria       | Root Medicinal & veterinary Digestive system                           |
| Puerto Yaminahua | Euterpe precatoria       | Root Medicinal & veterinary Poisonings                                 |
| Puerto Yaminahua | Euterpe precatoria       | Root Medicinal & veterinary Urinary system                             |
| Puerto Yaminahua | Euterpe precatoria       | Spear leaf Utensils & tools Domestic utensils                          |
| Puerto Yaminahua | Euterpe precatoria       | Stem Construction Houses                                               |
| Puerto Yaminahua | Geonoma deversa          | Entire leaf Construction Thatch                                        |
| Puerto Yaminahua | Iriartea deltoidea       | Entire leaf Construction Thatch                                        |
| Puerto Yaminahua | Iriartea deltoidea       | Fruit Cultural Recreational                                            |
| Puerto Yaminahua | Iriartea deltoidea       | Stem Construction Houses                                               |
| Puerto Yaminahua | Iriartea deltoidea       | Stem Utensils & tools Domestic utensils                                |
| Puerto Yaminahua | Mauritia flexuosa        | Entire leaf Construction Thatch                                        |
| Puerto Yaminahua | Mauritia flexuosa        | Fruit Human food Beverages                                             |
| Puerto Yaminahua | Mauritia flexuosa        | Fruit Human food Food                                                  |
| Puerto Yaminahua | Oenocarpus bataua        | Entire leaf Construction Thatch                                        |
| Puerto Yaminahua | Oenocarpus bataua        | Fruit Cultural Cosmetic                                                |
| Puerto Yaminahua | Oenocarpus bataua        | Fruit Human food Beverages                                             |
| Puerto Yaminahua | Oenocarpus bataua        | Fruit Human food Food                                                  |
| Puerto Yaminahua | Oenocarpus bataua        | Stem Other Miscellaneous                                               |
| Puerto Yaminahua | Oenocarpus mapora        | Fruit Human food Beverages                                             |
| Puerto Yaminahua | Phytelephas macrocarpa   | Entire leaf Construction Thatch                                        |
| Puerto Yaminahua | Phytelephas macrocarpa   | Fruit Human food Food                                                  |
| Puerto Yaminahua | Phytelephas macrocarpa   | Seed Human food Food                                                   |
| Puerto Yaminahua | Phytelephas macrocarpa   | Spear leaf Utensils & tools Domestic utensils                          |
| Puerto Yaminahua | Socratea exorrhiza       | Root Utensils & tools Domestic utensils                                |
| Puerto Yaminahua | Socratea exorrhiza       | Stem Construction Houses                                               |
| Puerto Yaminahua | Socratea exorrhiza       | Stem Utensils & tools Domestic utensils                                |
| Puerto Quito     | Astrocaryum standleyanum | Entire leaf Construction Thatch                                        |
| Puerto Quito     | Astrocaryum standleyanum | Fruit Human food Food                                                  |
| Puerto Quito     | Astrocaryum standleyanum | Spear leaf Cultural Clothes and accessories                            |
| Puerto Quito     | Astrocaryum standleyanum | Spear leaf Cultural Ritual                                             |
| Puerto Quito     | Astrocaryum standleyanum | Spear leaf Utensils & tools Domestic utensils                          |
| Puerto Quito     | Astrocaryum standleyanum | Stem Other Miscellaneous                                               |
| Puerto Quito     | Attalea colenda          | Entire leaf Construction Thatch                                        |
| Puerto Quito     | Attalea colenda          | Fruit Cultural Personal adornment                                      |
| Puerto Quito     | Attalea colenda          | Fruit Human food Beverages                                             |
| Puerto Quito     | Attalea colenda          | Fruit Human food Oils                                                  |
| Puerto Quito     | Attalea colenda          | Palm heart Human food Food                                             |
| Puerto Quito     | Attalea colenda          | Seed Human food Food                                                   |
| Puerto Quito     | Attalea colenda          | Spear leaf Cultural Ritual                                             |
| Puerto Quito     | Attalea colenda          | Stem Construction Houses                                               |
| Puerto Quito     | Attalea colenda          | Stem Other Miscellaneous                                               |
| Puerto Quito     | Euterpe precatoria       | Seed Cultural Personal adornment                                       |
| Puerto Quito     | Iriartea deltoidea       | Entire leaf Construction Thatch                                        |
| Puerto Quito     | Iriartea deltoidea       | Palm heart Human food Food                                             |
| Puerto Quito     | Iriartea deltoidea       | Seed Cultural Personal adornment                                       |
| Puerto Quito     | Iriartea deltoidea       | Seed Utensils & tools Domestic utensils                                |
| Puerto Quito     | Iriartea deltoidea       | Stem Construction Bridges                                              |
| Puerto Quito     | Iriartea deltoidea       | Stem Construction Houses                                               |
| Puerto Quito     | Iriartea deltoidea       | Stem Construction Thatch                                               |
| Puerto Quito     | Iriartea deltoidea       | Stem Cultural Personal adornment                                       |
| Puerto Quito     | Iriartea deltoidea       | Stem Cultural Recreational                                             |
| Puerto Quito     | Iriartea deltoidea       | Stem Environmental Fences                                              |
| Puerto Quito     | Iriartea deltoidea       | Stem Other Miscellaneous                                               |
| Puerto Quito     | Iriartea deltoidea       | Stem Utensils & tools Domestic utensils                                |
| Puerto Quito     | Iriartea deltoidea       | Stem Utensils & tools Hunting and fishing                              |
| Puerto Quito     | Iriartea deltoidea       | Stem Utensils & tools Other                                            |
| Puerto Quito     | Oenocarpus bataua        | Entire leaf Construction Thatch                                        |
| Puerto Quito     | Oenocarpus bataua        | Fruit Human food Beverages                                             |
| Puerto Quito     | Oenocarpus bataua        | Fruit Human food Food                                                  |

|               |                          |                                                                    |
|---------------|--------------------------|--------------------------------------------------------------------|
| Puerto Quito  | Oenocarpus bataua        | Leaf sheath Utensils & tools Domestic utensils                     |
| Puerto Quito  | Oenocarpus bataua        | Stem Construction Houses                                           |
| Puerto Quito  | Oenocarpus bataua        | Stem Other Miscellaneous                                           |
| Puerto Quito  | Socratea exorrhiza       | Entire leaf Construction Thatch                                    |
| Puerto Quito  | Socratea exorrhiza       | Stem Construction Houses                                           |
| Puerto Quito  | Socratea exorrhiza       | Stem Construction Other                                            |
| Puerto Quito  | Socratea exorrhiza       | Stem Environmental Fences                                          |
| Puerto Quito  | Socratea exorrhiza       | Stem Other Miscellaneous                                           |
| Puerto Quito  | Wettinia quinaria        | Entire leaf Construction Thatch                                    |
| Puerto Quito  | Wettinia quinaria        | Palm heart Human food Food                                         |
| Puerto Quito  | Wettinia quinaria        | Seed Human food Food                                               |
| Puerto Quito  | Wettinia quinaria        | Stem Construction Bridges                                          |
| Puerto Quito  | Wettinia quinaria        | Stem Construction Houses                                           |
| Puerto Quito  | Wettinia quinaria        | Stem Construction Other                                            |
| Puerto Quito  | Wettinia quinaria        | Stem Environmental Fences                                          |
| Puerto Pervel | Ammandra decasperma      | Entire leaf Construction Thatch                                    |
| Puerto Pervel | Ammandra decasperma      | Petiole Utensils & tools Domestic utensils                         |
| Puerto Pervel | Ammandra decasperma      | Seed Human food Beverages                                          |
| Puerto Pervel | Ammandra decasperma      | Seed Human food Food                                               |
| Puerto Pervel | Ammandra decasperma      | Spear leaf Cultural Clothes and accessories                        |
| Puerto Pervel | Ammandra decasperma      | Spear leaf Utensils & tools Domestic utensils                      |
| Puerto Pervel | Asterogyne martiana      | Entire leaf Construction Thatch                                    |
| Puerto Pervel | Asterogyne martiana      | Entire leaf Utensils & tools Hunting and fishing                   |
| Puerto Pervel | Asterogyne martiana      | Entire leaf Utensils & tools Wrappers                              |
| Puerto Pervel | Asterogyne martiana      | Entire plant Environmental Ornamental                              |
| Puerto Pervel | Asterogyne martiana      | Fruit Medicinal & veterinary Not specified at all                  |
| Puerto Pervel | Asterogyne martiana      | Seed Human food Food                                               |
| Puerto Pervel | Asterogyne martiana      | Spear leaf Utensils & tools Domestic utensils                      |
| Puerto Pervel | Astrocaryum standleyanum | Fruit Animal food Fodder                                           |
| Puerto Pervel | Astrocaryum standleyanum | Fruit Cultural Personal adornment                                  |
| Puerto Pervel | Astrocaryum standleyanum | Fruit Human food Beverages                                         |
| Puerto Pervel | Astrocaryum standleyanum | Fruit Human food Food                                              |
| Puerto Pervel | Astrocaryum standleyanum | Fruit Human food Oils                                              |
| Puerto Pervel | Astrocaryum standleyanum | Spear leaf Utensils & tools Domestic utensils                      |
| Puerto Pervel | Astrocaryum standleyanum | Stem Construction Houses                                           |
| Puerto Pervel | Astrocaryum standleyanum | Stem Environmental Fences                                          |
| Puerto Pervel | Astrocaryum standleyanum | Stem Utensils & tools Domestic utensils                            |
| Puerto Pervel | Attalea allenii          | Entire leaf Construction Thatch                                    |
| Puerto Pervel | Attalea allenii          | Entire leaf Medicinal & veterinary Cultural diseases and disorders |
| Puerto Pervel | Attalea allenii          | Fruit Cultural Recreational                                        |
| Puerto Pervel | Attalea allenii          | Fruit Human food Oils                                              |
| Puerto Pervel | Attalea allenii          | Seed Cultural Cosmetic                                             |
| Puerto Pervel | Attalea allenii          | Seed Human food Beverages                                          |
| Puerto Pervel | Attalea allenii          | Seed Human food Food                                               |
| Puerto Pervel | Attalea allenii          | Seed Medicinal & veterinary Urinary system                         |
| Puerto Pervel | Attalea allenii          | Seed Other Miscellaneous                                           |
| Puerto Pervel | Attalea allenii          | Spear leaf Cultural Clothes and accessories                        |
| Puerto Pervel | Attalea allenii          | Spear leaf Cultural Recreational                                   |
| Puerto Pervel | Attalea allenii          | Spear leaf Cultural Ritual                                         |
| Puerto Pervel | Attalea allenii          | Spear leaf Environmental Ornamental                                |
| Puerto Pervel | Attalea allenii          | Spear leaf Utensils & tools Domestic utensils                      |
| Puerto Pervel | Attalea cuatrecasana     | Seed Human food Beverages                                          |
| Puerto Pervel | Attalea cuatrecasana     | Seed Human food Food                                               |
| Puerto Pervel | Attalea cuatrecasana     | Spear leaf Cultural Ritual                                         |
| Puerto Pervel | Bactris coloniata        | Palm heart Human food Food                                         |
| Puerto Pervel | Bactris coloniata        | Seed Human food Beverages                                          |
| Puerto Pervel | Bactris coloniata        | Seed Human food Food                                               |
| Puerto Pervel | Bactris coloniata        | Stem Construction Houses                                           |
| Puerto Pervel | Bactris coloniata        | Stem Construction Thatch                                           |
| Puerto Pervel | Bactris coloniata        | Stem Cultural Recreational                                         |
| Puerto Pervel | Bactris coloniata        | Stem Environmental Fences                                          |
| Puerto Pervel | Bactris coloniata        | Stem Utensils & tools Domestic utensils                            |
| Puerto Pervel | Bactris coloniata        | Stem Utensils & tools Hunting and fishing                          |
| Puerto Pervel | Bactris coloniata        | Stem Utensils & tools Labour tools                                 |
| Puerto Pervel | Bactris maraja           | Seed Human food Beverages                                          |
| Puerto Pervel | Bactris maraja           | Seed Human food Food                                               |
| Puerto Pervel | Bactris maraja           | Stem Construction Other                                            |
| Puerto Pervel | Bactris maraja           | Stem Construction Thatch                                           |
| Puerto Pervel | Bactris maraja           | Stem Cultural Recreational                                         |
| Puerto Pervel | Bactris maraja           | Stem Environmental Fences                                          |
| Puerto Pervel | Bactris maraja           | Stem Utensils & tools Domestic utensils                            |
| Puerto Pervel | Bactris maraja           | Stem Utensils & tools Hunting and fishing                          |
| Puerto Pervel | Bactris maraja           | Stem Utensils & tools Labour tools                                 |
| Puerto Pervel | Chelyocarpus Dianeurus   | Entire leaf Construction Thatch                                    |
| Puerto Pervel | Chelyocarpus Dianeurus   | Entire leaf Utensils & tools Domestic utensils                     |
| Puerto Pervel | Chelyocarpus Dianeurus   | Entire leaf Utensils & tools Wrappers                              |
| Puerto Pervel | Chelyocarpus Dianeurus   | Leaf sheath Utensils & tools Domestic utensils                     |
| Puerto Pervel | Desmoncus cirriferus     | Palm heart Human food Food                                         |
| Puerto Pervel | Desmoncus cirriferus     | Palm heart Medicinal & veterinary Infections and infestations      |
| Puerto Pervel | Desmoncus cirriferus     | Palm heart Medicinal & veterinary Skin and subcutaneous tissue     |
| Puerto Pervel | Desmoncus cirriferus     | Stem Construction Houses                                           |
| Puerto Pervel | Desmoncus cirriferus     | Stem Utensils & tools Domestic utensils                            |
| Puerto Pervel | Desmoncus cirriferus     | Stem Utensils & tools Hunting and fishing                          |
| Puerto Pervel | Desmoncus cirriferus     | Stem Utensils & tools Rope                                         |
| Puerto Pervel | Euterpe oleracea         | Entire leaf Construction Thatch                                    |
| Puerto Pervel | Euterpe oleracea         | Entire leaf Utensils & tools Domestic utensils                     |
| Puerto Pervel | Euterpe oleracea         | Fruit Human food Beverages                                         |

|               |                        |                                                                    |
|---------------|------------------------|--------------------------------------------------------------------|
| Puerto Pervel | Euterpe oleracea       | Fruit Human food Food                                              |
| Puerto Pervel | Euterpe oleracea       | Fruit Human food Oils                                              |
| Puerto Pervel | Euterpe oleracea       | Fruit Medicinal & veterinary Blood and Cardio-vascular system      |
| Puerto Pervel | Euterpe oleracea       | Palm heart Human food Food                                         |
| Puerto Pervel | Euterpe oleracea       | Stem Construction Houses                                           |
| Puerto Pervel | Euterpe oleracea       | Stem Construction Other                                            |
| Puerto Pervel | Euterpe oleracea       | Stem Construction Thatch                                           |
| Puerto Pervel | Euterpe oleracea       | Stem Environmental Fences                                          |
| Puerto Pervel | Euterpe oleracea       | Stem Utensils & tools Domestic utensils                            |
| Puerto Pervel | Euterpe oleracea       | Stem Utensils & tools Hunting and fishing                          |
| Puerto Pervel | Euterpe precatoria     | Fruit Human food Beverages                                         |
| Puerto Pervel | Euterpe precatoria     | Fruit Human food Food                                              |
| Puerto Pervel | Euterpe precatoria     | Palm heart Human food Food                                         |
| Puerto Pervel | Euterpe precatoria     | Stem Construction Houses                                           |
| Puerto Pervel | Euterpe precatoria     | Stem Environmental Fences                                          |
| Puerto Pervel | Euterpe precatoria     | Stem Utensils & tools Hunting and fishing                          |
| Puerto Pervel | Geonoma cuneata        | Entire leaf Construction Thatch                                    |
| Puerto Pervel | Geonoma cuneata        | Stem Cultural Clothes and accessories                              |
| Puerto Pervel | Geonoma cuneata        | Stem Utensils & tools Hunting and fishing                          |
| Puerto Pervel | Iriarteia deltoidea    | Entire leaf Construction Thatch                                    |
| Puerto Pervel | Iriarteia deltoidea    | Spear leaf Utensils & tools Domestic utensils                      |
| Puerto Pervel | Iriarteia deltoidea    | Stem Construction Houses                                           |
| Puerto Pervel | Iriarteia deltoidea    | Stem Construction Other                                            |
| Puerto Pervel | Iriarteia deltoidea    | Stem Construction Transportation                                   |
| Puerto Pervel | Iriarteia deltoidea    | Stem Environmental Fences                                          |
| Puerto Pervel | Iriarteia deltoidea    | Stem Utensils & tools Domestic utensils                            |
| Puerto Pervel | Iriarteia deltoidea    | Stem Utensils & tools Hunting and fishing                          |
| Puerto Pervel | Iriarteia deltoidea    | Stem Utensils & tools Labour tools                                 |
| Puerto Pervel | Manicaria saccifera    | Bract Cultural Clothes and accessories                             |
| Puerto Pervel | Manicaria saccifera    | Bract Cultural Personal adornment                                  |
| Puerto Pervel | Manicaria saccifera    | Bract Cultural Ritual                                              |
| Puerto Pervel | Manicaria saccifera    | Bract Medicinal & veterinary Blood and Cardio-vascular system      |
| Puerto Pervel | Manicaria saccifera    | Bract Utensils & tools Domestic utensils                           |
| Puerto Pervel | Manicaria saccifera    | Bract Utensils & tools Labour tools                                |
| Puerto Pervel | Manicaria saccifera    | Bract Utensils & tools Wrappers                                    |
| Puerto Pervel | Manicaria saccifera    | Entire leaf Construction Thatch                                    |
| Puerto Pervel | Manicaria saccifera    | Entire leaf Medicinal & veterinary Cultural diseases and disorders |
| Puerto Pervel | Manicaria saccifera    | Seed Human food Beverages                                          |
| Puerto Pervel | Manicaria saccifera    | Seed Human food Food                                               |
| Puerto Pervel | Manicaria saccifera    | Seed Medicinal & veterinary Blood and Cardio-vascular system       |
| Puerto Pervel | Manicaria saccifera    | Seed Medicinal & veterinary Digestive system                       |
| Puerto Pervel | Manicaria saccifera    | Seed Medicinal & veterinary Not specified at all                   |
| Puerto Pervel | Manicaria saccifera    | Seed Medicinal & veterinary Other                                  |
| Puerto Pervel | Manicaria saccifera    | Seed Medicinal & veterinary Reproductive system and sex health     |
| Puerto Pervel | Manicaria saccifera    | Seed Medicinal & veterinary Respiratory system                     |
| Puerto Pervel | Manicaria saccifera    | Seed Medicinal & veterinary Urinary system                         |
| Puerto Pervel | Mauritiella macroclada | Entire leaf Construction Thatch                                    |
| Puerto Pervel | Mauritiella macroclada | Stem Construction Houses                                           |
| Puerto Pervel | Mauritiella macroclada | Stem Construction Other                                            |
| Puerto Pervel | Mauritiella macroclada | Stem Construction Thatch                                           |
| Puerto Pervel | Mauritiella macroclada | Stem Environmental Fences                                          |
| Puerto Pervel | Mauritiella macroclada | Stem Utensils & tools Domestic utensils                            |
| Puerto Pervel | Mauritiella macroclada | Stem Utensils & tools Hunting and fishing                          |
| Puerto Pervel | Oenocarpus bataua      | Entire leaf Construction Thatch                                    |
| Puerto Pervel | Oenocarpus bataua      | Entire leaf Utensils & tools Domestic utensils                     |
| Puerto Pervel | Oenocarpus bataua      | Fruit Cultural Cosmetic                                            |
| Puerto Pervel | Oenocarpus bataua      | Fruit Environmental Soil improvers                                 |
| Puerto Pervel | Oenocarpus bataua      | Fruit Human food Beverages                                         |
| Puerto Pervel | Oenocarpus bataua      | Fruit Human food Food                                              |
| Puerto Pervel | Oenocarpus bataua      | Fruit Human food Oils                                              |
| Puerto Pervel | Oenocarpus bataua      | Palm heart Human food Food                                         |
| Puerto Pervel | Oenocarpus bataua      | Seed Cultural Recreational                                         |
| Puerto Pervel | Oenocarpus bataua      | Seed Utensils & tools Domestic utensils                            |
| Puerto Pervel | Oenocarpus bataua      | Spear leaf Utensils & tools Domestic utensils                      |
| Puerto Pervel | Oenocarpus bataua      | Stem Construction Houses                                           |
| Puerto Pervel | Oenocarpus bataua      | Stem Other Miscellaneous                                           |
| Puerto Pervel | Oenocarpus bataua      | Stem Utensils & tools Domestic utensils                            |
| Puerto Pervel | Oenocarpus bataua      | Stem Utensils & tools Hunting and fishing                          |
| Puerto Pervel | Oenocarpus mapora      | Entire leaf Construction Thatch                                    |
| Puerto Pervel | Oenocarpus mapora      | Entire leaf Utensils & tools Domestic utensils                     |
| Puerto Pervel | Oenocarpus mapora      | Fruit Human food Beverages                                         |
| Puerto Pervel | Oenocarpus mapora      | Fruit Human food Food                                              |
| Puerto Pervel | Oenocarpus mapora      | Fruit Human food Oils                                              |
| Puerto Pervel | Oenocarpus mapora      | Fruit Medicinal & veterinary Urinary system                        |
| Puerto Pervel | Oenocarpus mapora      | Palm heart Human food Food                                         |
| Puerto Pervel | Oenocarpus mapora      | Seed Cultural Recreational                                         |
| Puerto Pervel | Oenocarpus mapora      | Spear leaf Utensils & tools Domestic utensils                      |
| Puerto Pervel | Oenocarpus mapora      | Stem Construction Houses                                           |
| Puerto Pervel | Oenocarpus mapora      | Stem Construction Other                                            |
| Puerto Pervel | Oenocarpus mapora      | Stem Construction Thatch                                           |
| Puerto Pervel | Oenocarpus mapora      | Stem Environmental Fences                                          |
| Puerto Pervel | Oenocarpus mapora      | Stem Utensils & tools Domestic utensils                            |
| Puerto Pervel | Oenocarpus mapora      | Stem Utensils & tools Hunting and fishing                          |
| Puerto Pervel | Oenocarpus mapora      | Stem Utensils & tools Labour tools                                 |
| Puerto Pervel | Socratea exorrhiza     | Entire leaf Construction Thatch                                    |
| Puerto Pervel | Socratea exorrhiza     | Seed Cultural Recreational                                         |
| Puerto Pervel | Socratea exorrhiza     | Stem Construction Houses                                           |

|               |                           |                                                  |
|---------------|---------------------------|--------------------------------------------------|
| Puerto Pervel | Socratea exorrhiza        | Stem Construction Other                          |
| Puerto Pervel | Socratea exorrhiza        | Stem Construction Thatch                         |
| Puerto Pervel | Socratea exorrhiza        | Stem Environmental Fences                        |
| Puerto Pervel | Socratea exorrhiza        | Stem Utensils & tools Domestic utensils          |
| Puerto Pervel | Socratea exorrhiza        | Stem Utensils & tools Hunting and fishing        |
| Puerto Pervel | Socratea exorrhiza        | Stem Utensils & tools Labour tools               |
| Puerto Pervel | Welfia regia              | Entire leaf Construction Thatch                  |
| Puerto Pervel | Welfia regia              | Seed Human food Food                             |
| Puerto Pervel | Welfia regia              | Spear leaf Cultural Ritual                       |
| Puerto Pervel | Welfia regia              | Spear leaf Utensils & tools Domestic utensils    |
| Puerto Pervel | Welfia regia              | Stem Construction Houses                         |
| Puerto Pervel | Welfia regia              | Stem Environmental Fences                        |
| Puerto Pervel | Welfia regia              | Stem Fuel Firewood                               |
| Puerto Pervel | Wettinia quinaria         | Entire leaf Construction Thatch                  |
| Puerto Pervel | Wettinia quinaria         | Palm heart Human food Food                       |
| Puerto Pervel | Wettinia quinaria         | Palm heart Toxic Hunting                         |
| Puerto Pervel | Wettinia quinaria         | Seed Human food Food                             |
| Puerto Pervel | Wettinia quinaria         | Stem Construction Houses                         |
| Puerto Pervel | Wettinia quinaria         | Stem Construction Other                          |
| Puerto Pervel | Wettinia quinaria         | Stem Construction Thatch                         |
| Puerto Pervel | Wettinia quinaria         | Stem Environmental Fences                        |
| Puerto Pervel | Wettinia quinaria         | Stem Toxic Hunting                               |
| Puerto Pervel | Wettinia quinaria         | Stem Utensils & tools Domestic utensils          |
| Puerto Pervel | Wettinia quinaria         | Stem Utensils & tools Hunting and fishing        |
| Puerto Pervel | Wettinia quinaria         | Stem Utensils & tools Labour tools               |
| Pucasucho     | Aiphanes horrida          | Seed Human food Food                             |
| Pucasucho     | Astrocaryum gratum        | Fruit Cultural Recreational                      |
| Pucasucho     | Attalea princeps          | Bract Cultural Recreational                      |
| Pucasucho     | Ceroxylon parvum          | Spear leaf Cultural Ritual                       |
| Pucasucho     | Ceroxylon parvum          | Stem Construction Houses                         |
| Pucasucho     | Chamaedorea angustisecta  | Flower Medicinal & veterinary Digestive system   |
| Pucasucho     | Chamaedorea pinnatifrons  | Entire leaf Utensils & tools Wrappers            |
| Pucasucho     | Dictyocaryum lamarckianum | Entire leaf Construction Thatch                  |
| Pucasucho     | Dictyocaryum lamarckianum | Leaf sheath Utensils & tools Domestic utensils   |
| Pucasucho     | Dictyocaryum lamarckianum | Palm heart Human food Food                       |
| Pucasucho     | Dictyocaryum lamarckianum | Stem Construction Houses                         |
| Pucasucho     | Dictyocaryum lamarckianum | Stem Construction Other                          |
| Pucasucho     | Euterpe precatória        | Entire leaf Construction Thatch                  |
| Pucasucho     | Euterpe precatória        | Palm heart Human food Food                       |
| Pucasucho     | Euterpe precatória        | Stem Construction Houses                         |
| Pucasucho     | Geonoma deversa           | Entire leaf Construction Thatch                  |
| Pucasucho     | Geonoma undata            | Entire leaf Construction Thatch                  |
| Pucasucho     | Geonoma undata            | Stem Construction Houses                         |
| Pucasucho     | Iriarteia deltoidea       | Entire leaf Construction Thatch                  |
| Pucasucho     | Iriarteia deltoidea       | Palm heart Human food Food                       |
| Pucasucho     | Iriarteia deltoidea       | Stem Construction Houses                         |
| Pucasucho     | Iriarteia deltoidea       | Stem Utensils & tools Domestic utensils          |
| Pucasucho     | Oenocarpus bataua         | Entire leaf Construction Thatch                  |
| Pucasucho     | Oenocarpus bataua         | Fruit Human food Beverages                       |
| Pucasucho     | Oenocarpus bataua         | Leaf rachis Utensils & tools Domestic utensils   |
| Pucasucho     | Oenocarpus bataua         | Palm heart Human food Food                       |
| Pucasucho     | Oenocarpus bataua         | Stem Construction Houses                         |
| Pucasucho     | Oenocarpus bataua         | Stem Construction Other                          |
| Pucasucho     | Oenocarpus bataua         | Stem Other Miscellaneous                         |
| Pucasucho     | Socratea exorrhiza        | Entire leaf Construction Thatch                  |
| Pucasucho     | Socratea exorrhiza        | Root Cultural Recreational                       |
| Pucasucho     | Socratea exorrhiza        | Stem Construction Houses                         |
| Pucasucho     | Socratea exorrhiza        | Stem Utensils & tools Domestic utensils          |
| Peripa        | Astrocaryum standleyanum  | Fruit Cultural Personal adornment                |
| Peripa        | Astrocaryum standleyanum  | Fruit Human food Food                            |
| Peripa        | Astrocaryum standleyanum  | Palm heart Human food Food                       |
| Peripa        | Astrocaryum standleyanum  | Stem Construction Houses                         |
| Peripa        | Astrocaryum standleyanum  | Stem Other Miscellaneous                         |
| Peripa        | Attalea colenda           | Entire leaf Construction Thatch                  |
| Peripa        | Attalea colenda           | Fruit Cultural Personal adornment                |
| Peripa        | Attalea colenda           | Fruit Cultural Recreational                      |
| Peripa        | Attalea colenda           | Fruit Human food Oils                            |
| Peripa        | Attalea colenda           | Fruit Medicinal & veterinary Respiratory system  |
| Peripa        | Attalea colenda           | Palm heart Human food Food                       |
| Peripa        | Attalea colenda           | Seed Human food Beverages                        |
| Peripa        | Attalea colenda           | Seed Human food Food                             |
| Peripa        | Attalea colenda           | Spear leaf Cultural Ritual                       |
| Peripa        | Attalea colenda           | Stem Other Miscellaneous                         |
| Peripa        | Dictyocaryum lamarckianum | Entire leaf Construction Thatch                  |
| Peripa        | Geonoma cuneata           | Seed Cultural Personal adornment                 |
| Peripa        | Iriarteia deltoidea       | Entire leaf Construction Thatch                  |
| Peripa        | Iriarteia deltoidea       | Leaf sheath Utensils & tools Domestic utensils   |
| Peripa        | Iriarteia deltoidea       | Palm heart Human food Food                       |
| Peripa        | Iriarteia deltoidea       | Root Medicinal & veterinary Not specified at all |
| Peripa        | Iriarteia deltoidea       | Root Utensils & tools Labour tools               |
| Peripa        | Iriarteia deltoidea       | Seed Cultural Personal adornment                 |
| Peripa        | Iriarteia deltoidea       | Seed Cultural Recreational                       |
| Peripa        | Iriarteia deltoidea       | Seed Human food Food                             |
| Peripa        | Iriarteia deltoidea       | Spear leaf Cultural Ritual                       |
| Peripa        | Iriarteia deltoidea       | Stem Construction Houses                         |
| Peripa        | Iriarteia deltoidea       | Stem Construction Thatch                         |
| Peripa        | Iriarteia deltoidea       | Stem Cultural Personal adornment                 |

|            |                              |                                                             |
|------------|------------------------------|-------------------------------------------------------------|
| Peripa     | Iriartea deltoidea           | Stem Cultural Recreational                                  |
| Peripa     | Iriartea deltoidea           | Stem Cultural Ritual                                        |
| Peripa     | Iriartea deltoidea           | Stem Environmental Fences                                   |
| Peripa     | Iriartea deltoidea           | Stem Fuel Firewood                                          |
| Peripa     | Iriartea deltoidea           | Stem Medicinal & veterinary Cultural diseases and disorders |
| Peripa     | Iriartea deltoidea           | Stem Other Miscellaneous                                    |
| Peripa     | Iriartea deltoidea           | Stem Utensils & tools Domestic utensils                     |
| Peripa     | Iriartea deltoidea           | Stem Utensils & tools Hunting and fishing                   |
| Peripa     | Iriartea deltoidea           | Stem Utensils & tools Labour tools                          |
| Peripa     | Oenocarpus bataua            | Entire leaf Construction Thatch                             |
| Peripa     | Oenocarpus bataua            | Fruit Human food Beverages                                  |
| Peripa     | Oenocarpus bataua            | Fruit Human food Food                                       |
| Peripa     | Oenocarpus bataua            | Palm heart Human food Food                                  |
| Peripa     | Oenocarpus bataua            | Spear leaf Cultural Ritual                                  |
| Peripa     | Oenocarpus bataua            | Stem Other Miscellaneous                                    |
| Peripa     | Phytelephas aequatorialis    | Entire leaf Construction Thatch                             |
| Peripa     | Phytelephas aequatorialis    | Seed Cultural Clothes and accessories                       |
| Peripa     | Phytelephas aequatorialis    | Seed Cultural Personal adornment                            |
| Peripa     | Phytelephas aequatorialis    | Seed Human food Beverages                                   |
| Peripa     | Phytelephas aequatorialis    | Seed Human food Food                                        |
| Peripa     | Phytelephas aequatorialis    | Seed Medicinal & veterinary Digestive system                |
| Peripa     | Phytelephas aequatorialis    | Seed Medicinal & veterinary Urinary system                  |
| Peripa     | Phytelephas aequatorialis    | Stem Other Miscellaneous                                    |
| Peripa     | Prestoea pubens              | Entire leaf Construction Thatch                             |
| Peripa     | Prestoea pubens              | Seed Human food Food                                        |
| Peripa     | Prestoea pubens              | Stem Construction Houses                                    |
| Peripa     | Socratea exorrhiza           | Fruit Human food Food                                       |
| Peripa     | Socratea exorrhiza           | Seed Cultural Personal adornment                            |
| Peripa     | Socratea exorrhiza           | Seed Human food Food                                        |
| Peripa     | Socratea exorrhiza           | Stem Construction Houses                                    |
| Peripa     | Socratea exorrhiza           | Stem Construction Thatch                                    |
| Peripa     | Socratea exorrhiza           | Stem Other Miscellaneous                                    |
| Peripa     | Synechanthus warscewiczianus | Entire leaf Cultural Dyes                                   |
| Peripa     | Synechanthus warscewiczianus | Fruit Cultural Dyes                                         |
| Peripa     | Wettinia aequalis            | Entire leaf Construction Thatch                             |
| Peripa     | Wettinia aequalis            | Fruit Medicinal & veterinary Urinary system                 |
| Peripa     | Wettinia aequalis            | Palm heart Human food Food                                  |
| Peripa     | Wettinia aequalis            | Seed Human food Food                                        |
| Peripa     | Wettinia aequalis            | Stem Construction Houses                                    |
| Peripa     | Wettinia aequalis            | Stem Other Miscellaneous                                    |
| Peripa     | Wettinia quinaria            | Entire leaf Construction Thatch                             |
| Peripa     | Wettinia quinaria            | Seed Cultural Personal adornment                            |
| Peripa     | Wettinia quinaria            | Seed Human food Food                                        |
| Peripa     | Wettinia quinaria            | Stem Construction Houses                                    |
| Peripa     | Wettinia quinaria            | Stem Construction Other                                     |
| Peripa     | Wettinia quinaria            | Stem Cultural Recreational                                  |
| Peripa     | Wettinia quinaria            | Stem Other Miscellaneous                                    |
| Peripa     | Wettinia quinaria            | Stem Utensils & tools Domestic utensils                     |
| Peripa     | Wettinia quinaria            | Stem Utensils & tools Labour tools                          |
| Palma Real | Astrocaryum gratum           | Entire leaf Construction Thatch                             |
| Palma Real | Astrocaryum gratum           | Entire leaf Cultural Ritual                                 |
| Palma Real | Astrocaryum gratum           | Fruit Cultural Personal adornment                           |
| Palma Real | Astrocaryum gratum           | Fruit Cultural Recreational                                 |
| Palma Real | Astrocaryum gratum           | Fruit Human food Beverages                                  |
| Palma Real | Astrocaryum gratum           | Fruit Human food Food                                       |
| Palma Real | Astrocaryum gratum           | Leaf rachis Utensils & tools Domestic utensils              |
| Palma Real | Astrocaryum gratum           | Palm heart Human food Food                                  |
| Palma Real | Astrocaryum gratum           | Seed Human food Food                                        |
| Palma Real | Astrocaryum gratum           | Seed Other Miscellaneous                                    |
| Palma Real | Astrocaryum gratum           | Spear leaf Cultural Clothes and accessories                 |
| Palma Real | Astrocaryum gratum           | Spear leaf Cultural Ritual                                  |
| Palma Real | Astrocaryum gratum           | Spear leaf Utensils & tools Domestic utensils               |
| Palma Real | Astrocaryum gratum           | Stem Construction Houses                                    |
| Palma Real | Astrocaryum gratum           | Stem Human food Food                                        |
| Palma Real | Astrocaryum gratum           | Stem Other Miscellaneous                                    |
| Palma Real | Astrocaryum gratum           | Stem Utensils & tools Hunting and fishing                   |
| Palma Real | Attalea bassleriana          | Bract Cultural Recreational                                 |
| Palma Real | Attalea bassleriana          | Entire leaf Construction Thatch                             |
| Palma Real | Attalea bassleriana          | Fruit Cultural Personal adornment                           |
| Palma Real | Attalea bassleriana          | Fruit Human food Food                                       |
| Palma Real | Attalea bassleriana          | Seed Cultural Cosmetic                                      |
| Palma Real | Attalea bassleriana          | Seed Human food Food                                        |
| Palma Real | Attalea bassleriana          | Seed Human food Oils                                        |
| Palma Real | Attalea bassleriana          | Seed Medicinal & veterinary Respiratory system              |
| Palma Real | Attalea bassleriana          | Seed Medicinal & veterinary Skin and subcutaneous tissue    |
| Palma Real | Attalea bassleriana          | Seed Other Miscellaneous                                    |
| Palma Real | Attalea bassleriana          | Spear leaf Utensils & tools Domestic utensils               |
| Palma Real | Attalea bassleriana          | Stem Construction Houses                                    |
| Palma Real | Attalea bassleriana          | Stem Other Miscellaneous                                    |
| Palma Real | Attalea maripa               | Bract Utensils & tools Domestic utensils                    |
| Palma Real | Attalea maripa               | Entire leaf Construction Thatch                             |
| Palma Real | Attalea maripa               | Fruit Cultural Personal adornment                           |
| Palma Real | Attalea maripa               | Fruit Human food Food                                       |
| Palma Real | Attalea maripa               | Seed Cultural Cosmetic                                      |
| Palma Real | Attalea maripa               | Seed Human food Food                                        |
| Palma Real | Attalea maripa               | Seed Other Miscellaneous                                    |
| Palma Real | Attalea maripa               | Spear leaf Utensils & tools Domestic utensils               |

|            |                          |                                                                         |
|------------|--------------------------|-------------------------------------------------------------------------|
| Palma Real | Attalea maripa           | Stem Other Miscellaneous                                                |
| Palma Real | Attalea maripa           | Stem Utensils & tools Hunting and fishing                               |
| Palma Real | Attalea princeps         | Bract Cultural Recreational                                             |
| Palma Real | Attalea princeps         | Bract Utensils & tools Domestic utensils                                |
| Palma Real | Attalea princeps         | Entire leaf Construction Houses                                         |
| Palma Real | Attalea princeps         | Entire leaf Construction Thatch                                         |
| Palma Real | Attalea princeps         | Fruit Cultural Personal adornment                                       |
| Palma Real | Attalea princeps         | Fruit Human food Food                                                   |
| Palma Real | Attalea princeps         | Palm heart Human food Food                                              |
| Palma Real | Attalea princeps         | Seed Cultural Cosmetic                                                  |
| Palma Real | Attalea princeps         | Seed Human food Food                                                    |
| Palma Real | Attalea princeps         | Seed Human food Oils                                                    |
| Palma Real | Attalea princeps         | Seed Medicinal & veterinary Infections and infestations                 |
| Palma Real | Attalea princeps         | Seed Medicinal & veterinary Respiratory system                          |
| Palma Real | Attalea princeps         | Seed Other Miscellaneous                                                |
| Palma Real | Attalea princeps         | Spear leaf Cultural Clothes and accessories                             |
| Palma Real | Attalea princeps         | Spear leaf Utensils & tools Domestic utensils                           |
| Palma Real | Attalea princeps         | Stem Construction Houses                                                |
| Palma Real | Attalea princeps         | Stem Other Miscellaneous                                                |
| Palma Real | Bactris concinna         | Fruit Cultural Personal adornment                                       |
| Palma Real | Bactris concinna         | Fruit Human food Food                                                   |
| Palma Real | Bactris concinna         | Seed Human food Food                                                    |
| Palma Real | Bactris concinna         | Stem Cultural Recreational                                              |
| Palma Real | Bactris concinna         | Stem Utensils & tools Hunting and fishing                               |
| Palma Real | Bactris maraja           | Fruit Human food Food                                                   |
| Palma Real | Bactris riparia          | Fruit Cultural Personal adornment                                       |
| Palma Real | Bactris riparia          | Fruit Human food Food                                                   |
| Palma Real | Bactris riparia          | Stem Cultural Recreational                                              |
| Palma Real | Bactris riparia          | Stem Utensils & tools Hunting and fishing                               |
| Palma Real | Chamaedorea angustisecta | Entire leaf Construction Thatch                                         |
| Palma Real | Chamaedorea angustisecta | Flower Cultural Cosmetic                                                |
| Palma Real | Chamaedorea angustisecta | Flower Medicinal & veterinary General Ailments with Unspecific Symptoms |
| Palma Real | Chamaedorea angustisecta | Seed Cultural Personal adornment                                        |
| Palma Real | Chamaedorea angustisecta | Stem Cultural Recreational                                              |
| Palma Real | Desmoncus polyacanthos   | Fruit Human food Food                                                   |
| Palma Real | Desmoncus polyacanthos   | Stem Utensils & tools Hunting and fishing                               |
| Palma Real | Euterpe precatoria       | Entire leaf Construction Thatch                                         |
| Palma Real | Euterpe precatoria       | Fruit Human food Beverages                                              |
| Palma Real | Euterpe precatoria       | Fruit Human food Food                                                   |
| Palma Real | Euterpe precatoria       | Infrutescence Utensils & tools Domestic utensils                        |
| Palma Real | Euterpe precatoria       | Palm heart Human food Food                                              |
| Palma Real | Euterpe precatoria       | Root Medicinal & veterinary Blood and Cardio-vascular system            |
| Palma Real | Euterpe precatoria       | Root Medicinal & veterinary Digestive system                            |
| Palma Real | Euterpe precatoria       | Root Medicinal & veterinary General Ailments with Unspecific Symptoms   |
| Palma Real | Euterpe precatoria       | Root Medicinal & veterinary Infections and infestations                 |
| Palma Real | Euterpe precatoria       | Root Medicinal & veterinary Metabolic system and nutrition              |
| Palma Real | Euterpe precatoria       | Root Medicinal & veterinary Musculo-skeletal system                     |
| Palma Real | Euterpe precatoria       | Root Medicinal & veterinary Reproductive system and sex health          |
| Palma Real | Euterpe precatoria       | Root Medicinal & veterinary Urinary system                              |
| Palma Real | Euterpe precatoria       | Seed Cultural Personal adornment                                        |
| Palma Real | Euterpe precatoria       | Spear leaf Cultural Clothes and accessories                             |
| Palma Real | Euterpe precatoria       | Spear leaf Utensils & tools Domestic utensils                           |
| Palma Real | Euterpe precatoria       | Stem Construction Houses                                                |
| Palma Real | Euterpe precatoria       | Stem Other Miscellaneous                                                |
| Palma Real | Euterpe precatoria       | Stem Utensils & tools Hunting and fishing                               |
| Palma Real | Geonoma deversa          | Entire leaf Construction Thatch                                         |
| Palma Real | Geonoma deversa          | Stem Construction Houses                                                |
| Palma Real | Geonoma deversa          | Stem Utensils & tools Hunting and fishing                               |
| Palma Real | Geonoma macrostachys     | Entire leaf Construction Thatch                                         |
| Palma Real | Hyospathe elegans        | Entire leaf Construction Thatch                                         |
| Palma Real | Hyospathe elegans        | Stem Construction Houses                                                |
| Palma Real | Iriarteia deltoidea      | Bract Utensils & tools Domestic utensils                                |
| Palma Real | Iriarteia deltoidea      | Entire leaf Construction Thatch                                         |
| Palma Real | Iriarteia deltoidea      | Fruit Human food Food                                                   |
| Palma Real | Iriarteia deltoidea      | Leaf sheath Cultural Ritual                                             |
| Palma Real | Iriarteia deltoidea      | Leaf sheath Utensils & tools Labour tools                               |
| Palma Real | Iriarteia deltoidea      | Palm heart Human food Food                                              |
| Palma Real | Iriarteia deltoidea      | Root Medicinal & veterinary Respiratory system                          |
| Palma Real | Iriarteia deltoidea      | Root Medicinal & veterinary Skin and subcutaneous tissue                |
| Palma Real | Iriarteia deltoidea      | Seed Cultural Personal adornment                                        |
| Palma Real | Iriarteia deltoidea      | Seed Human food Food                                                    |
| Palma Real | Iriarteia deltoidea      | Seed Other Miscellaneous                                                |
| Palma Real | Iriarteia deltoidea      | Stem Construction Houses                                                |
| Palma Real | Iriarteia deltoidea      | Stem Construction Transportation                                        |
| Palma Real | Iriarteia deltoidea      | Stem Other Miscellaneous                                                |
| Palma Real | Iriarteia deltoidea      | Stem Utensils & tools Domestic utensils                                 |
| Palma Real | Mauritia flexuosa        | Entire leaf Construction Thatch                                         |
| Palma Real | Mauritia flexuosa        | Fruit Human food Beverages                                              |
| Palma Real | Mauritia flexuosa        | Fruit Human food Food                                                   |
| Palma Real | Mauritia flexuosa        | Petiole Construction Houses                                             |
| Palma Real | Mauritia flexuosa        | Petiole Utensils & tools Domestic utensils                              |
| Palma Real | Mauritia flexuosa        | Petiole Utensils & tools Hunting and fishing                            |
| Palma Real | Mauritia flexuosa        | Seed Cultural Personal adornment                                        |
| Palma Real | Mauritia flexuosa        | Spear leaf Cultural Clothes and accessories                             |
| Palma Real | Mauritia flexuosa        | Spear leaf Cultural Ritual                                              |
| Palma Real | Mauritia flexuosa        | Spear leaf Utensils & tools Domestic utensils                           |
| Palma Real | Mauritia flexuosa        | Stem Construction Houses                                                |



|            |                        |                                                           |
|------------|------------------------|-----------------------------------------------------------|
| Palma Real | Mauritia flexuosa      | Stem Other Miscellaneous                                  |
| Palma Real | Oenocarpus bataua      | Entire leaf Construction Thatch                           |
| Palma Real | Oenocarpus bataua      | Fruit Cultural Cosmetic                                   |
| Palma Real | Oenocarpus bataua      | Fruit Cultural Personal adornment                         |
| Palma Real | Oenocarpus bataua      | Fruit Human food Beverages                                |
| Palma Real | Oenocarpus bataua      | Fruit Human food Food                                     |
| Palma Real | Oenocarpus bataua      | Fruit Human food Oils                                     |
| Palma Real | Oenocarpus bataua      | Fruit Medicinal & veterinary Respiratory system           |
| Palma Real | Oenocarpus bataua      | Fruit Medicinal & veterinary Skin and subcutaneous tissue |
| Palma Real | Oenocarpus bataua      | Leaf rachis Construction Thatch                           |
| Palma Real | Oenocarpus bataua      | Petiole Utensils & tools Domestic utensils                |
| Palma Real | Oenocarpus bataua      | Seed Human food Food                                      |
| Palma Real | Oenocarpus bataua      | Seed Other Miscellaneous                                  |
| Palma Real | Oenocarpus bataua      | Spear leaf Cultural Clothes and accessories               |
| Palma Real | Oenocarpus bataua      | Spear leaf Utensils & tools Domestic utensils             |
| Palma Real | Oenocarpus bataua      | Stem Construction Houses                                  |
| Palma Real | Oenocarpus bataua      | Stem Other Miscellaneous                                  |
| Palma Real | Oenocarpus mapora      | Entire leaf Construction Thatch                           |
| Palma Real | Oenocarpus mapora      | Fruit Cultural Cosmetic                                   |
| Palma Real | Oenocarpus mapora      | Fruit Cultural Personal adornment                         |
| Palma Real | Oenocarpus mapora      | Fruit Human food Beverages                                |
| Palma Real | Oenocarpus mapora      | Fruit Human food Food                                     |
| Palma Real | Oenocarpus mapora      | Fruit Human food Oils                                     |
| Palma Real | Oenocarpus mapora      | Spear leaf Utensils & tools Domestic utensils             |
| Palma Real | Oenocarpus mapora      | Stem Construction Houses                                  |
| Palma Real | Oenocarpus mapora      | Stem Other Miscellaneous                                  |
| Palma Real | Oenocarpus mapora      | Stem Utensils & tools Hunting and fishing                 |
| Palma Real | Phytelephas macrocarpa | Entire leaf Construction Thatch                           |
| Palma Real | Phytelephas macrocarpa | Entire leaf Cultural Ritual                               |
| Palma Real | Phytelephas macrocarpa | Fruit Human food Food                                     |
| Palma Real | Phytelephas macrocarpa | Seed Cultural Personal adornment                          |
| Palma Real | Phytelephas macrocarpa | Seed Human food Food                                      |
| Palma Real | Phytelephas macrocarpa | Spear leaf Utensils & tools Domestic utensils             |
| Palma Real | Socratea exorrhiza     | Bract Utensils & tools Domestic utensils                  |
| Palma Real | Socratea exorrhiza     | Entire leaf Construction Thatch                           |
| Palma Real | Socratea exorrhiza     | Fruit Human food Food                                     |
| Palma Real | Socratea exorrhiza     | Root Cultural Ritual                                      |
| Palma Real | Socratea exorrhiza     | Root Medicinal & veterinary Respiratory system            |
| Palma Real | Socratea exorrhiza     | Root Medicinal & veterinary Skin and subcutaneous tissue  |
| Palma Real | Socratea exorrhiza     | Root Utensils & tools Domestic utensils                   |
| Palma Real | Socratea exorrhiza     | Seed Cultural Personal adornment                          |
| Palma Real | Socratea exorrhiza     | Seed Other Miscellaneous                                  |
| Palma Real | Socratea exorrhiza     | Stem Construction Houses                                  |
| Palma Real | Socratea exorrhiza     | Stem Other Miscellaneous                                  |
| Palma Real | Socratea exorrhiza     | Stem Utensils & tools Domestic utensils                   |
| Pacuya     | Aiphanes ulei          | Seed Cultural Personal adornment                          |
| Pacuya     | Astrocaryum chambira   | Fruit Cultural Personal adornment                         |
| Pacuya     | Astrocaryum chambira   | Seed Human food Food                                      |
| Pacuya     | Astrocaryum chambira   | Spear leaf Cultural Clothes and accessories               |
| Pacuya     | Astrocaryum chambira   | Spear leaf Cultural Personal adornment                    |
| Pacuya     | Astrocaryum chambira   | Spear leaf Utensils & tools Domestic utensils             |
| Pacuya     | Astrocaryum chambira   | Spear leaf Utensils & tools Hunting and fishing           |
| Pacuya     | Astrocaryum chambira   | Spear leaf Utensils & tools Rope                          |
| Pacuya     | Astrocaryum chambira   | Stem Other Miscellaneous                                  |
| Pacuya     | Astrocaryum jauari     | Fruit Cultural Personal adornment                         |
| Pacuya     | Astrocaryum jauari     | Spear leaf Cultural Clothes and accessories               |
| Pacuya     | Astrocaryum urostachys | Fruit Cultural Personal adornment                         |
| Pacuya     | Astrocaryum urostachys | Seed Human food Food                                      |
| Pacuya     | Astrocaryum urostachys | Spear leaf Cultural Clothes and accessories               |
| Pacuya     | Attalea butyracea      | Entire leaf Construction Thatch                           |
| Pacuya     | Attalea butyracea      | Seed Human food Food                                      |
| Pacuya     | Attalea butyracea      | Seed Other Miscellaneous                                  |
| Pacuya     | Attalea butyracea      | Spear leaf Cultural Clothes and accessories               |
| Pacuya     | Attalea butyracea      | Stem Other Miscellaneous                                  |
| Pacuya     | Attalea insignis       | Entire leaf Construction Thatch                           |
| Pacuya     | Attalea insignis       | Entire leaf Utensils & tools Domestic utensils            |
| Pacuya     | Attalea insignis       | Petiole Utensils & tools Hunting and fishing              |
| Pacuya     | Attalea insignis       | Seed Human food Food                                      |
| Pacuya     | Attalea insignis       | Spear leaf Cultural Clothes and accessories               |
| Pacuya     | Attalea maripa         | Fruit Cultural Personal adornment                         |
| Pacuya     | Attalea maripa         | Petiole Utensils & tools Domestic utensils                |
| Pacuya     | Attalea maripa         | Petiole Utensils & tools Hunting and fishing              |
| Pacuya     | Attalea maripa         | Petiole Utensils & tools Labour tools                     |
| Pacuya     | Bactris concinna       | Petiole Utensils & tools Domestic utensils                |
| Pacuya     | Bactris concinna       | Seed Human food Food                                      |
| Pacuya     | Bactris concinna       | Stem Utensils & tools Hunting and fishing                 |
| Pacuya     | Bactris corossilla     | Fruit Human food Beverages                                |
| Pacuya     | Bactris corossilla     | Palm heart Human food Food                                |
| Pacuya     | Bactris corossilla     | Seed Human food Food                                      |
| Pacuya     | Bactris maraja         | Seed Cultural Personal adornment                          |
| Pacuya     | Bactris maraja         | Seed Human food Food                                      |
| Pacuya     | Bactris maraja         | Stem Utensils & tools Domestic utensils                   |
| Pacuya     | Bactris riparia        | Seed Cultural Personal adornment                          |
| Pacuya     | Desmoncus polyacanthos | Seed Cultural Personal adornment                          |
| Pacuya     | Desmoncus polyacanthos | Stem Utensils & tools Rope                                |
| Pacuya     | Euterpe precatoria     | Palm heart Human food Food                                |
| Pacuya     | Euterpe precatoria     | Root Medicinal & veterinary Dental health                 |

|                |                         |                                                          |
|----------------|-------------------------|----------------------------------------------------------|
| Pacuya         | Geonoma brongniartii    | Entire leaf Construction Thatch                          |
| Pacuya         | Geonoma brongniartii    | Stem Utensils & tools Labour tools                       |
| Pacuya         | Geonoma deversa         | Entire leaf Construction Thatch                          |
| Pacuya         | Geonoma macrostachys    | Entire leaf Construction Thatch                          |
| Pacuya         | Geonoma stricta         | Entire leaf Construction Thatch                          |
| Pacuya         | Hyospathe elegans       | Entire leaf Construction Thatch                          |
| Pacuya         | Hyospathe elegans       | Fruit Utensils & tools Hunting and fishing               |
| Pacuya         | Hyospathe elegans       | Palm heart Medicinal & veterinary Dental health          |
| Pacuya         | Hyospathe elegans       | Root Medicinal & veterinary Digestive system             |
| Pacuya         | Hyospathe elegans       | Stem Utensils & tools Hunting and fishing                |
| Pacuya         | Iriarteia deltoidea     | Entire leaf Construction Thatch                          |
| Pacuya         | Iriarteia deltoidea     | Palm heart Human food Food                               |
| Pacuya         | Iriarteia deltoidea     | Root Cultural Ritual                                     |
| Pacuya         | Iriarteia deltoidea     | Root Utensils & tools Domestic utensils                  |
| Pacuya         | Iriarteia deltoidea     | Seed Cultural Personal adornment                         |
| Pacuya         | Iriarteia deltoidea     | Seed Human food Food                                     |
| Pacuya         | Iriarteia deltoidea     | Seed Utensils & tools Other                              |
| Pacuya         | Iriarteia deltoidea     | Stem Construction Houses                                 |
| Pacuya         | Iriarteia deltoidea     | Stem Construction Transportation                         |
| Pacuya         | Iriarteia deltoidea     | Stem Cultural Ritual                                     |
| Pacuya         | Iriarteia deltoidea     | Stem Fuel Firewood                                       |
| Pacuya         | Iriarteia deltoidea     | Stem Other Miscellaneous                                 |
| Pacuya         | Iriarteia deltoidea     | Stem Utensils & tools Domestic utensils                  |
| Pacuya         | Iriarteia deltoidea     | Stem Utensils & tools Hunting and fishing                |
| Pacuya         | Mauritia flexuosa       | Fruit Human food Beverages                               |
| Pacuya         | Mauritia flexuosa       | Fruit Human food Food                                    |
| Pacuya         | Mauritia flexuosa       | Stem Other Miscellaneous                                 |
| Pacuya         | Mauritiella armata      | Fruit Human food Food                                    |
| Pacuya         | Mauritiella armata      | Stem Medicinal & veterinary Skin and subcutaneous tissue |
| Pacuya         | Mauritiella armata      | Stem Utensils & tools Hunting and fishing                |
| Pacuya         | Oenocarpus bataua       | Entire leaf Construction Thatch                          |
| Pacuya         | Oenocarpus bataua       | Entire leaf Utensils & tools Domestic utensils           |
| Pacuya         | Oenocarpus bataua       | Fruit Cultural Cosmetic                                  |
| Pacuya         | Oenocarpus bataua       | Fruit Human food Beverages                               |
| Pacuya         | Oenocarpus bataua       | Fruit Human food Food                                    |
| Pacuya         | Oenocarpus bataua       | Palm heart Human food Food                               |
| Pacuya         | Oenocarpus bataua       | Stem Other Miscellaneous                                 |
| Pacuya         | Oenocarpus mapora       | Fruit Human food Beverages                               |
| Pacuya         | Oenocarpus mapora       | Fruit Human food Food                                    |
| Pacuya         | Oenocarpus mapora       | Petiole Utensils & tools Domestic utensils               |
| Pacuya         | Oenocarpus mapora       | Stem Construction Houses                                 |
| Pacuya         | Oenocarpus mapora       | Stem Utensils & tools Hunting and fishing                |
| Pacuya         | Phytelephas tenuicaulis | Entire leaf Construction Thatch                          |
| Pacuya         | Phytelephas tenuicaulis | Palm heart Human food Food                               |
| Pacuya         | Phytelephas tenuicaulis | Seed Cultural Clothes and accessories                    |
| Pacuya         | Phytelephas tenuicaulis | Seed Human food Beverages                                |
| Pacuya         | Phytelephas tenuicaulis | Seed Human food Food                                     |
| Pacuya         | Phytelephas tenuicaulis | Seed Utensils & tools Other                              |
| Pacuya         | Socratea exorrhiza      | Root Utensils & tools Domestic utensils                  |
| Pacuya         | Socratea exorrhiza      | Seed Cultural Personal adornment                         |
| Pacuya         | Socratea exorrhiza      | Seed Utensils & tools Other                              |
| Pacuya         | Socratea exorrhiza      | Stem Construction Houses                                 |
| Pacuya         | Socratea exorrhiza      | Stem Other Miscellaneous                                 |
| Pacuya         | Socratea exorrhiza      | Stem Utensils & tools Hunting and fishing                |
| Pacuya         | Socratea exorrhiza      | Stem Utensils & tools Labour tools                       |
| Nuevo Progreso | Aphandra natalia        | Leaf sheath Utensils & tools Domestic utensils           |
| Nuevo Progreso | Astrocaryum chambira    | Seed Human food Food                                     |
| Nuevo Progreso | Astrocaryum chambira    | Seed Medicinal & veterinary Urinary system               |
| Nuevo Progreso | Astrocaryum chambira    | Spear leaf Cultural Clothes and accessories              |
| Nuevo Progreso | Astrocaryum chambira    | Spear leaf Utensils & tools Domestic utensils            |
| Nuevo Progreso | Astrocaryum chambira    | Spear leaf Utensils & tools Hunting and fishing          |
| Nuevo Progreso | Astrocaryum jauari      | Leaf rachis Utensils & tools Domestic utensils           |
| Nuevo Progreso | Astrocaryum jauari      | Spear leaf Cultural Clothes and accessories              |
| Nuevo Progreso | Astrocaryum jauari      | Spear leaf Utensils & tools Domestic utensils            |
| Nuevo Progreso | Astrocaryum jauari      | Stem Construction Houses                                 |
| Nuevo Progreso | Attalea maripa          | Petiole Utensils & tools Hunting and fishing             |
| Nuevo Progreso | Attalea peruviana       | Bract Cultural Recreational                              |
| Nuevo Progreso | Attalea peruviana       | Bract Fuel Fire starter                                  |
| Nuevo Progreso | Attalea peruviana       | Bract Utensils & tools Other                             |
| Nuevo Progreso | Attalea peruviana       | Entire leaf Construction Thatch                          |
| Nuevo Progreso | Attalea peruviana       | Fruit Human food Food                                    |
| Nuevo Progreso | Attalea peruviana       | Leaf rachis Utensils & tools Hunting and fishing         |
| Nuevo Progreso | Attalea peruviana       | Seed Human food Food                                     |
| Nuevo Progreso | Attalea peruviana       | Seed Other Miscellaneous                                 |
| Nuevo Progreso | Attalea peruviana       | Spear leaf Construction Houses                           |
| Nuevo Progreso | Attalea peruviana       | Spear leaf Utensils & tools Domestic utensils            |
| Nuevo Progreso | Attalea peruviana       | Stem Other Miscellaneous                                 |
| Nuevo Progreso | Bactris brongniartii    | Stem Construction Houses                                 |
| Nuevo Progreso | Bactris concinna        | Fruit Human food Food                                    |
| Nuevo Progreso | Desmoncus polyacanthos  | Stem Utensils & tools Domestic utensils                  |
| Nuevo Progreso | Euterpe precatoria      | Entire leaf Construction Thatch                          |
| Nuevo Progreso | Euterpe precatoria      | Fruit Human food Beverages                               |
| Nuevo Progreso | Euterpe precatoria      | Palm heart Human food Food                               |
| Nuevo Progreso | Euterpe precatoria      | Root Medicinal & veterinary Digestive system             |
| Nuevo Progreso | Euterpe precatoria      | Root Medicinal & veterinary Infections and infestations  |
| Nuevo Progreso | Euterpe precatoria      | Stem Construction Houses                                 |
| Nuevo Progreso | Iriarteia deltoidea     | Stem Construction Houses                                 |

|                |                        |                                                                       |
|----------------|------------------------|-----------------------------------------------------------------------|
| Nuevo Progreso | Iriartea deltoidea     | Stem Utensils & tools Domestic utensils                               |
| Nuevo Progreso | Lepidocaryum tenue     | Entire leaf Construction Thatch                                       |
| Nuevo Progreso | Mauritia flexuosa      | Entire leaf Construction Thatch                                       |
| Nuevo Progreso | Mauritia flexuosa      | Fruit Human food Beverages                                            |
| Nuevo Progreso | Mauritia flexuosa      | Fruit Human food Food                                                 |
| Nuevo Progreso | Mauritia flexuosa      | Spear leaf Cultural Clothes and accessories                           |
| Nuevo Progreso | Mauritia flexuosa      | Spear leaf Utensils & tools Domestic utensils                         |
| Nuevo Progreso | Mauritia flexuosa      | Stem Other Miscellaneous                                              |
| Nuevo Progreso | Mauritiella armata     | Fruit Human food Food                                                 |
| Nuevo Progreso | Mauritiella armata     | Stem Environmental Fences                                             |
| Nuevo Progreso | Oenocarpus bataua      | Fruit Human food Beverages                                            |
| Nuevo Progreso | Oenocarpus bataua      | Fruit Human food Food                                                 |
| Nuevo Progreso | Oenocarpus bataua      | Fruit Human food Oils                                                 |
| Nuevo Progreso | Oenocarpus bataua      | Fruit Medicinal & veterinary Respiratory system                       |
| Nuevo Progreso | Oenocarpus bataua      | Stem Other Miscellaneous                                              |
| Nuevo Progreso | Oenocarpus mapora      | Entire plant Cultural Ritual                                          |
| Nuevo Progreso | Oenocarpus mapora      | Fruit Human food Beverages                                            |
| Nuevo Progreso | Oenocarpus mapora      | Fruit Human food Food                                                 |
| Nuevo Progreso | Oenocarpus mapora      | Stem Construction Houses                                              |
| Nuevo Progreso | Phytelephas macrocarpa | Entire leaf Construction Thatch                                       |
| Nuevo Progreso | Phytelephas macrocarpa | Fruit Human food Food                                                 |
| Nuevo Progreso | Phytelephas macrocarpa | Seed Human food Food                                                  |
| Nuevo Progreso | Phytelephas macrocarpa | Seed Medicinal & veterinary General Ailments with Unspecific Symptoms |
| Nuevo Progreso | Socratea exorrhiza     | Palm heart Human food Food                                            |
| Nuevo Progreso | Socratea exorrhiza     | Root Utensils & tools Domestic utensils                               |
| Nuevo Progreso | Socratea exorrhiza     | Stem Construction Houses                                              |
| Nueva Samaria  | Astrocaryum chambira   | Fruit Human food Food                                                 |
| Nueva Samaria  | Astrocaryum chambira   | Infructescence Utensils & tools Domestic utensils                     |
| Nueva Samaria  | Astrocaryum chambira   | Leaf rachis Utensils & tools Domestic utensils                        |
| Nueva Samaria  | Astrocaryum chambira   | Palm heart Human food Food                                            |
| Nueva Samaria  | Astrocaryum chambira   | Petiole Utensils & tools Hunting and fishing                          |
| Nueva Samaria  | Astrocaryum chambira   | Seed Human food Food                                                  |
| Nueva Samaria  | Astrocaryum chambira   | Spear leaf Cultural Clothes and accessories                           |
| Nueva Samaria  | Astrocaryum chambira   | Spear leaf Utensils & tools Hunting and fishing                       |
| Nueva Samaria  | Astrocaryum chambira   | Spear leaf Utensils & tools Rope                                      |
| Nueva Samaria  | Astrocaryum chambira   | Stem Other Miscellaneous                                              |
| Nueva Samaria  | Attalea maripa         | Fruit Human food Food                                                 |
| Nueva Samaria  | Attalea maripa         | Palm heart Human food Food                                            |
| Nueva Samaria  | Attalea maripa         | Petiole Utensils & tools Hunting and fishing                          |
| Nueva Samaria  | Attalea maripa         | Stem Other Miscellaneous                                              |
| Nueva Samaria  | Bactris brongniartii   | Fruit Human food Food                                                 |
| Nueva Samaria  | Bactris brongniartii   | Palm heart Human food Food                                            |
| Nueva Samaria  | Bactris brongniartii   | Seed Human food Beverages                                             |
| Nueva Samaria  | Bactris brongniartii   | Spear leaf Medicinal & veterinary Sensory system                      |
| Nueva Samaria  | Bactris brongniartii   | Stem Construction Houses                                              |
| Nueva Samaria  | Bactris brongniartii   | Stem Cultural Clothes and accessories                                 |
| Nueva Samaria  | Bactris brongniartii   | Stem Utensils & tools Hunting and fishing                             |
| Nueva Samaria  | Desmoncus polyacanthos | Stem Construction Houses                                              |
| Nueva Samaria  | Desmoncus polyacanthos | Stem Utensils & tools Rope                                            |
| Nueva Samaria  | Euterpe precatória     | Entire leaf Construction Thatch                                       |
| Nueva Samaria  | Euterpe precatória     | Fruit Human food Food                                                 |
| Nueva Samaria  | Euterpe precatória     | Palm heart Human food Food                                            |
| Nueva Samaria  | Euterpe precatória     | Root Medicinal & veterinary Pregnancy, birth and puerperial           |
| Nueva Samaria  | Euterpe precatória     | Stem Other Miscellaneous                                              |
| Nueva Samaria  | Geonoma macrostachys   | Entire leaf Construction Thatch                                       |
| Nueva Samaria  | Hyospathe elegans      | Entire leaf Construction Thatch                                       |
| Nueva Samaria  | Iriartea deltoidea     | Entire leaf Construction Thatch                                       |
| Nueva Samaria  | Iriartea deltoidea     | Palm heart Human food Food                                            |
| Nueva Samaria  | Iriartea deltoidea     | Seed Human food Food                                                  |
| Nueva Samaria  | Iriartea deltoidea     | Stem Construction Houses                                              |
| Nueva Samaria  | Iriartea deltoidea     | Stem Other Miscellaneous                                              |
| Nueva Samaria  | Iriartea deltoidea     | Stem Utensils & tools Domestic utensils                               |
| Nueva Samaria  | Iriartea deltoidea     | Stem Utensils & tools Hunting and fishing                             |
| Nueva Samaria  | Mauritia flexuosa      | Entire leaf Construction Thatch                                       |
| Nueva Samaria  | Mauritia flexuosa      | Fruit Human food Beverages                                            |
| Nueva Samaria  | Mauritia flexuosa      | Fruit Human food Food                                                 |
| Nueva Samaria  | Mauritia flexuosa      | Palm heart Human food Food                                            |
| Nueva Samaria  | Mauritia flexuosa      | Petiole Construction Houses                                           |
| Nueva Samaria  | Mauritia flexuosa      | Petiole Utensils & tools Domestic utensils                            |
| Nueva Samaria  | Mauritia flexuosa      | Stem Other Miscellaneous                                              |
| Nueva Samaria  | Oenocarpus bataua      | Entire leaf Construction Thatch                                       |
| Nueva Samaria  | Oenocarpus bataua      | Fruit Human food Food                                                 |
| Nueva Samaria  | Oenocarpus bataua      | Leaf rachis Utensils & tools Domestic utensils                        |
| Nueva Samaria  | Oenocarpus bataua      | Leaf rachis Utensils & tools Hunting and fishing                      |
| Nueva Samaria  | Oenocarpus bataua      | Palm heart Human food Food                                            |
| Nueva Samaria  | Oenocarpus bataua      | Petiole Utensils & tools Hunting and fishing                          |
| Nueva Samaria  | Oenocarpus bataua      | Spear leaf Utensils & tools Domestic utensils                         |
| Nueva Samaria  | Oenocarpus bataua      | Stem Construction Houses                                              |
| Nueva Samaria  | Oenocarpus bataua      | Stem Other Miscellaneous                                              |
| Nueva Samaria  | Oenocarpus bataua      | Stem Utensils & tools Domestic utensils                               |
| Nueva Samaria  | Oenocarpus bataua      | Stem Utensils & tools Hunting and fishing                             |
| Nueva Samaria  | Oenocarpus mapora      | Entire leaf Construction Thatch                                       |
| Nueva Samaria  | Oenocarpus mapora      | Fruit Human food Food                                                 |
| Nueva Samaria  | Oenocarpus mapora      | Palm heart Human food Food                                            |
| Nueva Samaria  | Oenocarpus mapora      | Stem Construction Houses                                              |
| Nueva Samaria  | Oenocarpus mapora      | Stem Other Miscellaneous                                              |
| Nueva Samaria  | Oenocarpus mapora      | Stem Utensils & tools Domestic utensils                               |

|               |                           |                                                               |
|---------------|---------------------------|---------------------------------------------------------------|
| Nueva Samaria | Oenocarpus mapora         | Stem Utensils & tools Hunting and fishing                     |
| Nueva Samaria | Pholidostachys synanthera | Entire leaf Construction Thatch                               |
| Nueva Samaria | Socratea exorrhiza        | Entire leaf Construction Thatch                               |
| Nueva Samaria | Socratea exorrhiza        | Palm heart Human food Food                                    |
| Nueva Samaria | Socratea exorrhiza        | Palm heart Medicinal & veterinary Poisonings                  |
| Nueva Samaria | Socratea exorrhiza        | Root Utensils & tools Domestic utensils                       |
| Nueva Samaria | Socratea exorrhiza        | Seed Human food Food                                          |
| Nueva Samaria | Socratea exorrhiza        | Stem Construction Houses                                      |
| Nueva Samaria | Socratea exorrhiza        | Stem Other Miscellaneous                                      |
| Nueva Samaria | Socratea exorrhiza        | Stem Utensils & tools Hunting and fishing                     |
| Nueva Samaria | Socratea exorrhiza        | Stem Utensils & tools Labour tools                            |
| Nueva Samaria | Socratea salazarii        | Entire leaf Construction Thatch                               |
| Nueva Samaria | Socratea salazarii        | Fruit Human food Food                                         |
| Nueva Samaria | Socratea salazarii        | Palm heart Human food Food                                    |
| Nueva Samaria | Socratea salazarii        | Stem Construction Houses                                      |
| Nueva Samaria | Socratea salazarii        | Stem Utensils & tools Hunting and fishing                     |
| Nueva Samaria | Wettinia maynensis        | Entire leaf Construction Thatch                               |
| Nueva Samaria | Wettinia maynensis        | Fruit Human food Food                                         |
| Nueva Samaria | Wettinia maynensis        | Palm heart Human food Food                                    |
| Nueva Samaria | Wettinia maynensis        | Seed Human food Food                                          |
| Nueva Samaria | Wettinia maynensis        | Stem Construction Houses                                      |
| Nueva Samaria | Wettinia maynensis        | Stem Other Miscellaneous                                      |
| Nueva Samaria | Wettinia maynensis        | Stem Utensils & tools Hunting and fishing                     |
| Nanegalito    | Attalea colenda           | Entire leaf Construction Thatch                               |
| Nanegalito    | Attalea colenda           | Entire plant Environmental Ornamental                         |
| Nanegalito    | Attalea colenda           | Fruit Human food Food                                         |
| Nanegalito    | Attalea colenda           | Fruit Human food Oils                                         |
| Nanegalito    | Attalea colenda           | Palm heart Human food Food                                    |
| Nanegalito    | Attalea colenda           | Seed Human food Food                                          |
| Nanegalito    | Attalea colenda           | Stem Construction Bridges                                     |
| Nanegalito    | Attalea colenda           | Stem Construction Other                                       |
| Nanegalito    | Attalea colenda           | Stem Environmental Fences                                     |
| Nanegalito    | Attalea colenda           | Stem Utensils & tools Domestic utensils                       |
| Nanegalito    | Bactris setulosa          | Fruit Human food Beverages                                    |
| Nanegalito    | Bactris setulosa          | Fruit Human food Food                                         |
| Nanegalito    | Bactris setulosa          | Palm heart Human food Food                                    |
| Nanegalito    | Bactris setulosa          | Stem Construction Houses                                      |
| Nanegalito    | Bactris setulosa          | Stem Construction Thatch                                      |
| Nanegalito    | Ceroxylon echinulatum     | Entire leaf Construction Thatch                               |
| Nanegalito    | Ceroxylon echinulatum     | Entire plant Environmental Ornamental                         |
| Nanegalito    | Ceroxylon echinulatum     | Palm heart Human food Food                                    |
| Nanegalito    | Ceroxylon echinulatum     | Spear leaf Cultural Ritual                                    |
| Nanegalito    | Ceroxylon echinulatum     | Stem Construction Houses                                      |
| Nanegalito    | Ceroxylon echinulatum     | Stem Environmental Fences                                     |
| Nanegalito    | Ceroxylon echinulatum     | Stem Other Miscellaneous                                      |
| Nanegalito    | Chamaedorea linearis      | Entire plant Environmental Ornamental                         |
| Nanegalito    | Iriartea deltoidea        | Entire leaf Construction Thatch                               |
| Nanegalito    | Iriartea deltoidea        | Infrutescence Utensils & tools Other                          |
| Nanegalito    | Iriartea deltoidea        | Seed Cultural Personal adornment                              |
| Nanegalito    | Iriartea deltoidea        | Seed Human food Food                                          |
| Nanegalito    | Iriartea deltoidea        | Stem Construction Houses                                      |
| Nanegalito    | Iriartea deltoidea        | Stem Construction Other                                       |
| Nanegalito    | Iriartea deltoidea        | Stem Construction Thatch                                      |
| Nanegalito    | Iriartea deltoidea        | Stem Utensils & tools Domestic utensils                       |
| Nanegalito    | Iriartea deltoidea        | Stem Utensils & tools Other                                   |
| Nanegalito    | Oenocarpus bataua         | Entire leaf Construction Thatch                               |
| Nanegalito    | Oenocarpus bataua         | Fruit Human food Beverages                                    |
| Nanegalito    | Phytelephas aequatorialis | Entire leaf Construction Thatch                               |
| Nanegalito    | Phytelephas aequatorialis | Palm heart Human food Food                                    |
| Nanegalito    | Phytelephas aequatorialis | Seed Cultural Clothes and accessories                         |
| Nanegalito    | Phytelephas aequatorialis | Seed Cultural Personal adornment                              |
| Nanegalito    | Phytelephas aequatorialis | Seed Cultural Recreational                                    |
| Nanegalito    | Phytelephas aequatorialis | Seed Human food Food                                          |
| Nanegalito    | Phytelephas aequatorialis | Spear leaf Utensils & tools Domestic utensils                 |
| Nanegalito    | Phytelephas aequatorialis | Stem Other Miscellaneous                                      |
| Nanegalito    | Prestoea acuminata        | Entire leaf Construction Thatch                               |
| Nanegalito    | Prestoea acuminata        | Entire plant Cultural Ritual                                  |
| Nanegalito    | Prestoea acuminata        | Entire plant Environmental Fences                             |
| Nanegalito    | Prestoea acuminata        | Palm heart Human food Food                                    |
| Nanegalito    | Prestoea acuminata        | Seed Cultural Personal adornment                              |
| Nanegalito    | Prestoea acuminata        | Stem Construction Houses                                      |
| Nanegalito    | Prestoea acuminata        | Stem Environmental Fences                                     |
| Nanegalito    | Socratea exorrhiza        | Stem Environmental Fences                                     |
| Nanegalito    | Wettinia quinaria         | Stem Construction Houses                                      |
| Nanegalito    | Wettinia quinaria         | Stem Construction Other                                       |
| Nanegalito    | Wettinia quinaria         | Stem Environmental Fences                                     |
| Munaypata     | Aiphanes horrida          | Seed Human food Food                                          |
| Munaypata     | Aiphanes horrida          | Spines Medicinal & veterinary Cultural diseases and disorders |
| Munaypata     | Aiphanes horrida          | Stem Utensils & tools Hunting and fishing                     |
| Munaypata     | Astrocaryum gratum        | Fruit Human food Food                                         |
| Munaypata     | Astrocaryum gratum        | Fruit Medicinal & veterinary Blood and Cardio-vascular system |
| Munaypata     | Astrocaryum gratum        | Spines Medicinal & veterinary Cultural diseases and disorders |
| Munaypata     | Chamaedorea angustisecta  | Flower Medicinal & veterinary Digestive system                |
| Munaypata     | Chamaedorea pinnatifrons  | Entire leaf Utensils & tools Wrappers                         |
| Munaypata     | Dictyocaryum lamarckianum | Palm heart Human food Food                                    |
| Munaypata     | Dictyocaryum lamarckianum | Stem Construction Houses                                      |
| Munaypata     | Dictyocaryum lamarckianum | Stem Construction Thatch                                      |

|           |                           |                                                                        |
|-----------|---------------------------|------------------------------------------------------------------------|
| Munaypata | Dictyocaryum lamarckianum | Stem Utensils & tools Domestic utensils                                |
| Munaypata | Euterpe precatoria        | Palm heart Human food Food                                             |
| Munaypata | Euterpe precatoria        | Stem Construction Houses                                               |
| Munaypata | Geonoma undata            | Entire leaf Construction Thatch                                        |
| Munaypata | Iriarteia deltoidea       | Stem Construction Houses                                               |
| Munaypata | Oenocarpus bataua         | Entire leaf Construction Thatch                                        |
| Munaypata | Oenocarpus bataua         | Fruit Cultural Cosmetic                                                |
| Munaypata | Oenocarpus bataua         | Fruit Human food Beverages                                             |
| Munaypata | Oenocarpus bataua         | Fruit Human food Oils                                                  |
| Munaypata | Oenocarpus bataua         | Leaf rachis Utensils & tools Domestic utensils                         |
| Munaypata | Oenocarpus bataua         | Palm heart Human food Food                                             |
| Munaypata | Oenocarpus bataua         | Root Medicinal & veterinary Musculo-skeletal system                    |
| Munaypata | Oenocarpus bataua         | Spear leaf Utensils & tools Domestic utensils                          |
| Munaypata | Oenocarpus bataua         | Stem Other Miscellaneous                                               |
| Munaypata | Socratea exorrhiza        | Root Medicinal & veterinary Cultural diseases and disorders            |
| Munaypata | Socratea exorrhiza        | Root Medicinal & veterinary Musculo-skeletal system                    |
| Munaypata | Socratea exorrhiza        | Stem Construction Houses                                               |
| Munaypata | Socratea exorrhiza        | Stem Utensils & tools Domestic utensils                                |
| Motacuzal | Astrocaryum aculeatum     | Fruit Cultural Cosmetic                                                |
| Motacuzal | Astrocaryum aculeatum     | Fruit Human food Food                                                  |
| Motacuzal | Astrocaryum aculeatum     | Fruit Medicinal & veterinary General Ailments with Unspecific Symptoms |
| Motacuzal | Astrocaryum aculeatum     | Fruit Medicinal & veterinary Respiratory system                        |
| Motacuzal | Astrocaryum aculeatum     | Leaf rachis Utensils & tools Domestic utensils                         |
| Motacuzal | Astrocaryum aculeatum     | Seed Other Miscellaneous                                               |
| Motacuzal | Astrocaryum aculeatum     | Spear leaf Utensils & tools Domestic utensils                          |
| Motacuzal | Astrocaryum aculeatum     | Spines Medicinal & veterinary Skin and subcutaneous tissue             |
| Motacuzal | Astrocaryum aculeatum     | Stem Construction Houses                                               |
| Motacuzal | Astrocaryum aculeatum     | Stem Other Miscellaneous                                               |
| Motacuzal | Attalea maripa            | Bract Cultural Recreational                                            |
| Motacuzal | Attalea maripa            | Entire leaf Construction Thatch                                        |
| Motacuzal | Attalea maripa            | Fruit Human food Food                                                  |
| Motacuzal | Attalea maripa            | Seed Cultural Cosmetic                                                 |
| Motacuzal | Attalea maripa            | Seed Other Miscellaneous                                               |
| Motacuzal | Attalea maripa            | Spear leaf Utensils & tools Domestic utensils                          |
| Motacuzal | Attalea princeps          | Bract Cultural Recreational                                            |
| Motacuzal | Attalea princeps          | Entire leaf Construction Thatch                                        |
| Motacuzal | Attalea princeps          | Fruit Human food Food                                                  |
| Motacuzal | Attalea princeps          | Root Medicinal & veterinary Infections and infestations                |
| Motacuzal | Attalea princeps          | Seed Cultural Cosmetic                                                 |
| Motacuzal | Attalea princeps          | Seed Other Miscellaneous                                               |
| Motacuzal | Attalea princeps          | Spear leaf Cultural Clothes and accessories                            |
| Motacuzal | Attalea princeps          | Spear leaf Utensils & tools Domestic utensils                          |
| Motacuzal | Attalea princeps          | Stem Other Miscellaneous                                               |
| Motacuzal | Attalea speciosa          | Entire leaf Construction Thatch                                        |
| Motacuzal | Bactris acanthocarpa      | Fruit Human food Food                                                  |
| Motacuzal | Bactris acanthocarpa      | Stem Cultural Recreational                                             |
| Motacuzal | Bactris major             | Fruit Human food Food                                                  |
| Motacuzal | Bactris major             | Stem Cultural Recreational                                             |
| Motacuzal | Bactris maraja            | Fruit Human food Food                                                  |
| Motacuzal | Cheilocarpus chuco        | Entire leaf Construction Thatch                                        |
| Motacuzal | Cheilocarpus chuco        | Spear leaf Cultural Clothes and accessories                            |
| Motacuzal | Cheilocarpus chuco        | Stem Construction Houses                                               |
| Motacuzal | Cheilocarpus chuco        | Stem Cultural Recreational                                             |
| Motacuzal | Euterpe precatoria        | Entire leaf Construction Thatch                                        |
| Motacuzal | Euterpe precatoria        | Fruit Human food Beverages                                             |
| Motacuzal | Euterpe precatoria        | Fruit Human food Food                                                  |
| Motacuzal | Euterpe precatoria        | Palm heart Human food Food                                             |
| Motacuzal | Euterpe precatoria        | Root Medicinal & veterinary Infections and infestations                |
| Motacuzal | Euterpe precatoria        | Stem Construction Houses                                               |
| Motacuzal | Euterpe precatoria        | Stem Other Miscellaneous                                               |
| Motacuzal | Geonoma deversa           | Entire leaf Construction Thatch                                        |
| Motacuzal | Iriarteia deltoidea       | Stem Construction Houses                                               |
| Motacuzal | Mauritia flexuosa         | Entire leaf Construction Thatch                                        |
| Motacuzal | Mauritia flexuosa         | Fruit Human food Beverages                                             |
| Motacuzal | Mauritia flexuosa         | Fruit Human food Food                                                  |
| Motacuzal | Mauritia flexuosa         | Petiole Utensils & tools Domestic utensils                             |
| Motacuzal | Mauritia flexuosa         | Stem Construction Houses                                               |
| Motacuzal | Oenocarpus balickii       | Fruit Cultural Cosmetic                                                |
| Motacuzal | Oenocarpus balickii       | Fruit Human food Beverages                                             |
| Motacuzal | Oenocarpus balickii       | Fruit Human food Food                                                  |
| Motacuzal | Oenocarpus balickii       | Stem Other Miscellaneous                                               |
| Motacuzal | Oenocarpus bataua         | Fruit Cultural Cosmetic                                                |
| Motacuzal | Oenocarpus bataua         | Fruit Human food Beverages                                             |
| Motacuzal | Oenocarpus bataua         | Fruit Human food Food                                                  |
| Motacuzal | Oenocarpus bataua         | Fruit Medicinal & veterinary General Ailments with Unspecific Symptoms |
| Motacuzal | Oenocarpus bataua         | Stem Other Miscellaneous                                               |
| Motacuzal | Oenocarpus mapora         | Fruit Cultural Cosmetic                                                |
| Motacuzal | Oenocarpus mapora         | Fruit Human food Beverages                                             |
| Motacuzal | Oenocarpus mapora         | Fruit Human food Food                                                  |
| Motacuzal | Oenocarpus mapora         | Stem Other Miscellaneous                                               |
| Motacuzal | Socratea exorrhiza        | Entire leaf Construction Thatch                                        |
| Motacuzal | Socratea exorrhiza        | Root Utensils & tools Domestic utensils                                |
| Motacuzal | Socratea exorrhiza        | Spear leaf Utensils & tools Domestic utensils                          |
| Motacuzal | Socratea exorrhiza        | Stem Construction Houses                                               |
| Motacuzal | Syagrus sancona           | Fruit Human food Beverages                                             |
| Motacuzal | Syagrus sancona           | Fruit Human food Food                                                  |
| Mindo     | Attalea colenda           | Entire leaf Construction Thatch                                        |

|             |                           |                                                |
|-------------|---------------------------|------------------------------------------------|
| Mindo       | Attalea colenda           | Fruit Human food Food                          |
| Mindo       | Attalea colenda           | Fruit Human food Oils                          |
| Mindo       | Attalea colenda           | Palm heart Human food Food                     |
| Mindo       | Attalea colenda           | Spear leaf Cultural Ritual                     |
| Mindo       | Attalea colenda           | Stem Construction Houses                       |
| Mindo       | Bactris setulosa          | Fruit Human food Beverages                     |
| Mindo       | Bactris setulosa          | Fruit Human food Food                          |
| Mindo       | Bactris setulosa          | Palm heart Human food Food                     |
| Mindo       | Bactris setulosa          | Stem Construction Houses                       |
| Mindo       | Ceroxylon echinulatum     | Entire leaf Construction Thatch                |
| Mindo       | Ceroxylon echinulatum     | Seed Cultural Recreational                     |
| Mindo       | Ceroxylon echinulatum     | Spear leaf Cultural Ritual                     |
| Mindo       | Ceroxylon echinulatum     | Stem Construction Houses                       |
| Mindo       | Chamaedorea pinnatifrons  | Root Utensils & tools Domestic utensils        |
| Mindo       | Iriartea deltoidea        | Root Utensils & tools Domestic utensils        |
| Mindo       | Iriartea deltoidea        | Stem Construction Bridges                      |
| Mindo       | Iriartea deltoidea        | Stem Construction Houses                       |
| Mindo       | Iriartea deltoidea        | Stem Construction Other                        |
| Mindo       | Iriartea deltoidea        | Stem Cultural Recreational                     |
| Mindo       | Iriartea deltoidea        | Stem Other Miscellaneous                       |
| Mindo       | Iriartea deltoidea        | Stem Utensils & tools Domestic utensils        |
| Mindo       | Oenocarpus bataua         | Fruit Human food Beverages                     |
| Mindo       | Oenocarpus bataua         | Stem Construction Houses                       |
| Mindo       | Phytelephas aequatorialis | Entire leaf Construction Thatch                |
| Mindo       | Phytelephas aequatorialis | Fruit Animal food Fodder                       |
| Mindo       | Phytelephas aequatorialis | Palm heart Human food Food                     |
| Mindo       | Phytelephas aequatorialis | Seed Cultural Clothes and accessories          |
| Mindo       | Phytelephas aequatorialis | Seed Cultural Personal adornment               |
| Mindo       | Phytelephas aequatorialis | Seed Cultural Recreational                     |
| Mindo       | Phytelephas aequatorialis | Seed Human food Beverages                      |
| Mindo       | Phytelephas aequatorialis | Seed Human food Food                           |
| Mindo       | Phytelephas aequatorialis | Seed Medicinal & veterinary Respiratory system |
| Mindo       | Phytelephas aequatorialis | Seed Medicinal & veterinary Urinary system     |
| Mindo       | Phytelephas aequatorialis | Spear leaf Utensils & tools Domestic utensils  |
| Mindo       | Phytelephas aequatorialis | Stem Construction Houses                       |
| Mindo       | Phytelephas aequatorialis | Stem Other Miscellaneous                       |
| Mindo       | Phytelephas aequatorialis | Stem Utensils & tools Domestic utensils        |
| Mindo       | Prestoea acuminata        | Entire leaf Construction Thatch                |
| Mindo       | Prestoea acuminata        | Entire leaf Utensils & tools Domestic utensils |
| Mindo       | Prestoea acuminata        | Palm heart Human food Food                     |
| Mindo       | Socratea rostrata         | Seed Cultural Personal adornment               |
| Mindo       | Socratea rostrata         | Stem Construction Bridges                      |
| Mindo       | Socratea rostrata         | Stem Construction Houses                       |
| Mindo       | Socratea rostrata         | Stem Construction Other                        |
| Mindo       | Socratea rostrata         | Stem Environmental Fences                      |
| Mindo       | Socratea rostrata         | Stem Other Miscellaneous                       |
| Mindo       | Wettinia quinaria         | Stem Construction Houses                       |
| Mindo       | Wettinia quinaria         | Stem Construction Other                        |
| Mindo       | Wettinia quinaria         | Stem Environmental Fences                      |
| Lamas Wayku | Astrocaryum chambira      | Entire leaf Construction Thatch                |
| Lamas Wayku | Astrocaryum chambira      | Fruit Cultural Personal adornment              |
| Lamas Wayku | Astrocaryum chambira      | Fruit Human food Beverages                     |
| Lamas Wayku | Astrocaryum chambira      | Fruit Human food Food                          |
| Lamas Wayku | Astrocaryum chambira      | Fruit Utensils & tools Domestic utensils       |
| Lamas Wayku | Astrocaryum chambira      | Leaf rachis Utensils & tools Domestic utensils |
| Lamas Wayku | Astrocaryum chambira      | Palm heart Human food Food                     |
| Lamas Wayku | Astrocaryum chambira      | Seed Human food Food                           |
| Lamas Wayku | Astrocaryum chambira      | Spear leaf Cultural Clothes and accessories    |
| Lamas Wayku | Astrocaryum chambira      | Spear leaf Utensils & tools Domestic utensils  |
| Lamas Wayku | Astrocaryum chambira      | Spear leaf Utensils & tools Rope               |
| Lamas Wayku | Astrocaryum chambira      | Stem Fuel Firewood                             |
| Lamas Wayku | Astrocaryum chambira      | Stem Other Miscellaneous                       |
| Lamas Wayku | Astrocaryum huicungo      | Entire leaf Construction Thatch                |
| Lamas Wayku | Astrocaryum huicungo      | Fruit Cultural Personal adornment              |
| Lamas Wayku | Astrocaryum huicungo      | Fruit Human food Food                          |
| Lamas Wayku | Astrocaryum huicungo      | Fruit Utensils & tools Domestic utensils       |
| Lamas Wayku | Astrocaryum huicungo      | Palm heart Human food Food                     |
| Lamas Wayku | Astrocaryum huicungo      | Root Medicinal & veterinary Digestive system   |
| Lamas Wayku | Astrocaryum huicungo      | Seed Human food Food                           |
| Lamas Wayku | Astrocaryum huicungo      | Seed Human food Oils                           |
| Lamas Wayku | Attalea moorei            | Bract Utensils & tools Domestic utensils       |
| Lamas Wayku | Attalea moorei            | Entire leaf Construction Thatch                |
| Lamas Wayku | Attalea moorei            | Fruit Cultural Dyes                            |
| Lamas Wayku | Attalea moorei            | Fruit Human food Food                          |
| Lamas Wayku | Attalea moorei            | Leaf rachis Utensils & tools Domestic utensils |
| Lamas Wayku | Attalea moorei            | Palm heart Human food Food                     |
| Lamas Wayku | Attalea moorei            | Petiole Utensils & tools Hunting and fishing   |
| Lamas Wayku | Attalea moorei            | Seed Human food Food                           |
| Lamas Wayku | Attalea moorei            | Seed Other Miscellaneous                       |
| Lamas Wayku | Attalea moorei            | Spear leaf Utensils & tools Domestic utensils  |
| Lamas Wayku | Attalea moorei            | Stem Other Miscellaneous                       |
| Lamas Wayku | Bactris concinna          | Fruit Cultural Personal adornment              |
| Lamas Wayku | Bactris concinna          | Fruit Human food Beverages                     |
| Lamas Wayku | Bactris concinna          | Fruit Human food Food                          |
| Lamas Wayku | Bactris concinna          | Seed Human food Food                           |
| Lamas Wayku | Bactris concinna          | Stem Construction Houses                       |
| Lamas Wayku | Bactris concinna          | Stem Cultural Clothes and accessories          |

|             |                          |                                                                       |
|-------------|--------------------------|-----------------------------------------------------------------------|
| Lamas Wayku | Bactris concinna         | Stem Utensils & tools Hunting and fishing                             |
| Lamas Wayku | Bactris concinna         | Stem Utensils & tools Labour tools                                    |
| Lamas Wayku | Chamaedorea angustisecta | Flower Cultural Cosmetic                                              |
| Lamas Wayku | Chamaedorea angustisecta | Flower Medicinal & veterinary Not specified at all                    |
| Lamas Wayku | Chamaedorea pinnatifrons | Flower Cultural Cosmetic                                              |
| Lamas Wayku | Euterpe precatoria       | Entire leaf Construction Thatch                                       |
| Lamas Wayku | Euterpe precatoria       | Fruit Human food Beverages                                            |
| Lamas Wayku | Euterpe precatoria       | Fruit Human food Food                                                 |
| Lamas Wayku | Euterpe precatoria       | Palm heart Human food Food                                            |
| Lamas Wayku | Euterpe precatoria       | Root Medicinal & veterinary Digestive system                          |
| Lamas Wayku | Euterpe precatoria       | Root Medicinal & veterinary General Ailments with Unspecific Symptoms |
| Lamas Wayku | Euterpe precatoria       | Root Medicinal & veterinary Infections and infestations               |
| Lamas Wayku | Euterpe precatoria       | Root Medicinal & veterinary Not specified at all                      |
| Lamas Wayku | Euterpe precatoria       | Root Medicinal & veterinary Urinary system                            |
| Lamas Wayku | Euterpe precatoria       | Seed Cultural Personal adornment                                      |
| Lamas Wayku | Euterpe precatoria       | Stem Construction Houses                                              |
| Lamas Wayku | Euterpe precatoria       | Stem Fuel Firewood                                                    |
| Lamas Wayku | Euterpe precatoria       | Stem Other Miscellaneous                                              |
| Lamas Wayku | Euterpe precatoria       | Stem Utensils & tools Domestic utensils                               |
| Lamas Wayku | Euterpe precatoria       | Stem Utensils & tools Hunting and fishing                             |
| Lamas Wayku | Euterpe precatoria       | Stem Utensils & tools Labour tools                                    |
| Lamas Wayku | Geonoma macrostachys     | Entire leaf Construction Thatch                                       |
| Lamas Wayku | Hyospathe elegans        | Entire leaf Construction Thatch                                       |
| Lamas Wayku | Hyospathe elegans        | Stem Utensils & tools Domestic utensils                               |
| Lamas Wayku | Iriartea deltoidea       | Entire leaf Construction Thatch                                       |
| Lamas Wayku | Iriartea deltoidea       | Fruit Human food Food                                                 |
| Lamas Wayku | Iriartea deltoidea       | Palm heart Human food Food                                            |
| Lamas Wayku | Iriartea deltoidea       | Seed Cultural Personal adornment                                      |
| Lamas Wayku | Iriartea deltoidea       | Seed Cultural Recreational                                            |
| Lamas Wayku | Iriartea deltoidea       | Seed Human food Food                                                  |
| Lamas Wayku | Iriartea deltoidea       | Stem Construction Bridges                                             |
| Lamas Wayku | Iriartea deltoidea       | Stem Construction Houses                                              |
| Lamas Wayku | Iriartea deltoidea       | Stem Construction Other                                               |
| Lamas Wayku | Iriartea deltoidea       | Stem Construction Transportation                                      |
| Lamas Wayku | Iriartea deltoidea       | Stem Other Miscellaneous                                              |
| Lamas Wayku | Iriartea deltoidea       | Stem Utensils & tools Domestic utensils                               |
| Lamas Wayku | Mauritia flexuosa        | Entire leaf Construction Thatch                                       |
| Lamas Wayku | Mauritia flexuosa        | Entire plant Environmental Soil improvers                             |
| Lamas Wayku | Mauritia flexuosa        | Fruit Human food Beverages                                            |
| Lamas Wayku | Mauritia flexuosa        | Fruit Human food Food                                                 |
| Lamas Wayku | Mauritia flexuosa        | Palm heart Human food Food                                            |
| Lamas Wayku | Mauritia flexuosa        | Petiole Construction Houses                                           |
| Lamas Wayku | Mauritia flexuosa        | Petiole Fuel Fire starter                                             |
| Lamas Wayku | Mauritia flexuosa        | Petiole Utensils & tools Domestic utensils                            |
| Lamas Wayku | Mauritia flexuosa        | Seed Cultural Other                                                   |
| Lamas Wayku | Mauritia flexuosa        | Spear leaf Fuel Firewood                                              |
| Lamas Wayku | Mauritia flexuosa        | Spear leaf Utensils & tools Domestic utensils                         |
| Lamas Wayku | Mauritia flexuosa        | Stem Fuel Firewood                                                    |
| Lamas Wayku | Mauritia flexuosa        | Stem Other Miscellaneous                                              |
| Lamas Wayku | Mauritiella armata       | Fruit Human food Beverages                                            |
| Lamas Wayku | Mauritiella armata       | Fruit Human food Food                                                 |
| Lamas Wayku | Mauritiella armata       | Petiole Construction Houses                                           |
| Lamas Wayku | Mauritiella armata       | Stem Other Miscellaneous                                              |
| Lamas Wayku | Oenocarpus bataua        | Entire leaf Construction Thatch                                       |
| Lamas Wayku | Oenocarpus bataua        | Fruit Cultural Cosmetic                                               |
| Lamas Wayku | Oenocarpus bataua        | Fruit Cultural Personal adornment                                     |
| Lamas Wayku | Oenocarpus bataua        | Fruit Human food Beverages                                            |
| Lamas Wayku | Oenocarpus bataua        | Fruit Human food Food                                                 |
| Lamas Wayku | Oenocarpus bataua        | Fruit Human food Oils                                                 |
| Lamas Wayku | Oenocarpus bataua        | Palm heart Human food Food                                            |
| Lamas Wayku | Oenocarpus bataua        | Stem Construction Houses                                              |
| Lamas Wayku | Oenocarpus bataua        | Stem Fuel Firewood                                                    |
| Lamas Wayku | Oenocarpus bataua        | Stem Other Miscellaneous                                              |
| Lamas Wayku | Oenocarpus mapora        | Entire leaf Construction Thatch                                       |
| Lamas Wayku | Oenocarpus mapora        | Fruit Cultural Personal adornment                                     |
| Lamas Wayku | Oenocarpus mapora        | Fruit Human food Beverages                                            |
| Lamas Wayku | Oenocarpus mapora        | Fruit Human food Food                                                 |
| Lamas Wayku | Oenocarpus mapora        | Palm heart Human food Food                                            |
| Lamas Wayku | Oenocarpus mapora        | Root Medicinal & veterinary General Ailments with Unspecific Symptoms |
| Lamas Wayku | Oenocarpus mapora        | Stem Construction Houses                                              |
| Lamas Wayku | Oenocarpus mapora        | Stem Other Miscellaneous                                              |
| Lamas Wayku | Oenocarpus mapora        | Stem Utensils & tools Domestic utensils                               |
| Lamas Wayku | Phytelephas macrocarpa   | Entire leaf Construction Thatch                                       |
| Lamas Wayku | Phytelephas macrocarpa   | Fruit Animal food Wildlife attractant                                 |
| Lamas Wayku | Phytelephas macrocarpa   | Fruit Human food Food                                                 |
| Lamas Wayku | Phytelephas macrocarpa   | Petiole Utensils & tools Domestic utensils                            |
| Lamas Wayku | Phytelephas macrocarpa   | Seed Cultural Personal adornment                                      |
| Lamas Wayku | Phytelephas macrocarpa   | Seed Human food Food                                                  |
| Lamas Wayku | Phytelephas macrocarpa   | Spear leaf Utensils & tools Domestic utensils                         |
| Lamas Wayku | Socratea exorrhiza       | Entire leaf Construction Thatch                                       |
| Lamas Wayku | Socratea exorrhiza       | Palm heart Human food Food                                            |
| Lamas Wayku | Socratea exorrhiza       | Root Medicinal & veterinary Digestive system                          |
| Lamas Wayku | Socratea exorrhiza       | Seed Cultural Personal adornment                                      |
| Lamas Wayku | Socratea exorrhiza       | Seed Utensils & tools Domestic utensils                               |
| Lamas Wayku | Socratea exorrhiza       | Stem Construction Houses                                              |
| Lamas Wayku | Socratea exorrhiza       | Stem Utensils & tools Domestic utensils                               |
| Lamas Wayku | Socratea salazarii       | Entire leaf Construction Thatch                                       |

|             |                          |                                                                    |
|-------------|--------------------------|--------------------------------------------------------------------|
| Lamas Wayku | Socratea salazarii       | Fruit Cultural Personal adornment                                  |
| Lamas Wayku | Socratea salazarii       | Fruit Utensils & tools Domestic utensils                           |
| Lamas Wayku | Socratea salazarii       | Palm heart Human food Food                                         |
| Lamas Wayku | Socratea salazarii       | Petiole Utensils & tools Hunting and fishing                       |
| Lamas Wayku | Socratea salazarii       | Root Cultural Ritual                                               |
| Lamas Wayku | Socratea salazarii       | Root Fuel Firewood                                                 |
| Lamas Wayku | Socratea salazarii       | Root Medicinal & veterinary Digestive system                       |
| Lamas Wayku | Socratea salazarii       | Seed Human food Food                                               |
| Lamas Wayku | Socratea salazarii       | Stem Construction Houses                                           |
| Lamas Wayku | Socratea salazarii       | Stem Construction Other                                            |
| Lamas Wayku | Socratea salazarii       | Stem Construction Thatch                                           |
| Lamas Wayku | Socratea salazarii       | Stem Utensils & tools Domestic utensils                            |
| Lamas Wayku | Socratea salazarii       | Stem Utensils & tools Hunting and fishing                          |
| Lamas Wayku | Socratea salazarii       | Stem Utensils & tools Labour tools                                 |
| Lamas Wayku | Wettinia maynensis       | Entire leaf Construction Thatch                                    |
| Lamas Wayku | Wettinia maynensis       | Stem Construction Houses                                           |
| Lamas Wayku | Wettinia maynensis       | Stem Utensils & tools Domestic utensils                            |
| Kusutkau    | Aiphanes ulei            | Palm heart Medicinal & veterinary Dental health                    |
| Kusutkau    | Aphandra natalia         | Fruit Cultural Cosmetic                                            |
| Kusutkau    | Aphandra natalia         | Fruit Human food Oils                                              |
| Kusutkau    | Aphandra natalia         | Leaf sheath Utensils & tools Domestic utensils                     |
| Kusutkau    | Aphandra natalia         | Seed Human food Food                                               |
| Kusutkau    | Aphandra natalia         | Stem Other Miscellaneous                                           |
| Kusutkau    | Astrocaryum chambira     | Seed Human food Food                                               |
| Kusutkau    | Astrocaryum chambira     | Seed Other Miscellaneous                                           |
| Kusutkau    | Astrocaryum chambira     | Spear leaf Cultural Clothes and accessories                        |
| Kusutkau    | Astrocaryum chambira     | Spear leaf Cultural Personal adornment                             |
| Kusutkau    | Astrocaryum chambira     | Spear leaf Utensils & tools Domestic utensils                      |
| Kusutkau    | Astrocaryum chambira     | Spear leaf Utensils & tools Hunting and fishing                    |
| Kusutkau    | Astrocaryum chambira     | Spear leaf Utensils & tools Rope                                   |
| Kusutkau    | Astrocaryum chambira     | Stem Other Miscellaneous                                           |
| Kusutkau    | Astrocaryum urostachys   | Entire leaf Construction Thatch                                    |
| Kusutkau    | Astrocaryum urostachys   | Palm heart Human food Food                                         |
| Kusutkau    | Astrocaryum urostachys   | Seed Human food Food                                               |
| Kusutkau    | Astrocaryum urostachys   | Spear leaf Construction Thatch                                     |
| Kusutkau    | Astrocaryum urostachys   | Stem Other Miscellaneous                                           |
| Kusutkau    | Attalea bassleriana      | Bract Utensils & tools Domestic utensils                           |
| Kusutkau    | Attalea bassleriana      | Fruit Human food Beverages                                         |
| Kusutkau    | Attalea bassleriana      | Palm heart Human food Food                                         |
| Kusutkau    | Attalea bassleriana      | Seed Human food Food                                               |
| Kusutkau    | Attalea bassleriana      | Stem Other Miscellaneous                                           |
| Kusutkau    | Attalea maripa           | Bract Utensils & tools Domestic utensils                           |
| Kusutkau    | Attalea maripa           | Entire leaf Construction Thatch                                    |
| Kusutkau    | Attalea maripa           | Fruit Human food Beverages                                         |
| Kusutkau    | Attalea maripa           | Fruit Human food Food                                              |
| Kusutkau    | Attalea maripa           | Palm heart Human food Food                                         |
| Kusutkau    | Attalea maripa           | Petiole Utensils & tools Hunting and fishing                       |
| Kusutkau    | Attalea maripa           | Stem Other Miscellaneous                                           |
| Kusutkau    | Bactris corossilla       | Palm heart Medicinal & veterinary Blood and Cardio-vascular system |
| Kusutkau    | Bactris corossilla       | Seed Human food Beverages                                          |
| Kusutkau    | Bactris corossilla       | Seed Human food Food                                               |
| Kusutkau    | Bactris maraja           | Palm heart Medicinal & veterinary Blood and Cardio-vascular system |
| Kusutkau    | Bactris maraja           | Seed Human food Beverages                                          |
| Kusutkau    | Bactris maraja           | Seed Human food Food                                               |
| Kusutkau    | Chamaedorea pauciflora   | Flower Cultural Cosmetic                                           |
| Kusutkau    | Elaeis oleifera          | Fruit Animal food Fodder                                           |
| Kusutkau    | Elaeis oleifera          | Petiole Utensils & tools Hunting and fishing                       |
| Kusutkau    | Euterpe precatoria       | Fruit Cultural Cosmetic                                            |
| Kusutkau    | Euterpe precatoria       | Fruit Human food Food                                              |
| Kusutkau    | Euterpe precatoria       | Palm heart Human food Food                                         |
| Kusutkau    | Euterpe precatoria       | Root Cultural Cosmetic                                             |
| Kusutkau    | Euterpe precatoria       | Seed Utensils & tools Other                                        |
| Kusutkau    | Euterpe precatoria       | Stem Construction Thatch                                           |
| Kusutkau    | Euterpe precatoria       | Stem Other Miscellaneous                                           |
| Kusutkau    | Geonoma deversa          | Entire leaf Construction Thatch                                    |
| Kusutkau    | Geonoma deversa          | Entire leaf Utensils & tools Wrappers                              |
| Kusutkau    | Geonoma deversa          | Seed Human food Food                                               |
| Kusutkau    | Geonoma longepedunculata | Entire leaf Construction Thatch                                    |
| Kusutkau    | Geonoma macrostachys     | Entire leaf Construction Thatch                                    |
| Kusutkau    | Hyospathe elegans        | Entire leaf Construction Thatch                                    |
| Kusutkau    | Iriarteia deltoidea      | Entire leaf Construction Thatch                                    |
| Kusutkau    | Iriarteia deltoidea      | Entire leaf Utensils & tools Wrappers                              |
| Kusutkau    | Iriarteia deltoidea      | Palm heart Human food Food                                         |
| Kusutkau    | Iriarteia deltoidea      | Seed Human food Food                                               |
| Kusutkau    | Iriarteia deltoidea      | Stem Construction Houses                                           |
| Kusutkau    | Iriarteia deltoidea      | Stem Construction Thatch                                           |
| Kusutkau    | Iriarteia deltoidea      | Stem Other Miscellaneous                                           |
| Kusutkau    | Iriarteia deltoidea      | Stem Utensils & tools Domestic utensils                            |
| Kusutkau    | Iriarteia deltoidea      | Stem Utensils & tools Hunting and fishing                          |
| Kusutkau    | Mauritia flexuosa        | Fruit Cultural Cosmetic                                            |
| Kusutkau    | Mauritia flexuosa        | Fruit Human food Beverages                                         |
| Kusutkau    | Mauritia flexuosa        | Fruit Human food Food                                              |
| Kusutkau    | Mauritia flexuosa        | Fruit Medicinal & veterinary Musculo-skeletal system               |
| Kusutkau    | Mauritia flexuosa        | Palm heart Human food Food                                         |
| Kusutkau    | Mauritia flexuosa        | Root Cultural Cosmetic                                             |
| Kusutkau    | Mauritia flexuosa        | Spear leaf Utensils & tools Domestic utensils                      |
| Kusutkau    | Mauritia flexuosa        | Stem Other Miscellaneous                                           |



|          |                           |                                                                    |
|----------|---------------------------|--------------------------------------------------------------------|
| Kusutkau | Mauritiella armata        | Entire leaf Construction Thatch                                    |
| Kusutkau | Mauritiella armata        | Leaf rachis Utensils & tools Domestic utensils                     |
| Kusutkau | Mauritiella armata        | Stem Construction Houses                                           |
| Kusutkau | Oenocarpus bataua         | Fruit Cultural Cosmetic                                            |
| Kusutkau | Oenocarpus bataua         | Fruit Human food Beverages                                         |
| Kusutkau | Oenocarpus bataua         | Fruit Human food Food                                              |
| Kusutkau | Oenocarpus bataua         | Fruit Human food Oils                                              |
| Kusutkau | Oenocarpus bataua         | Fruit Utensils & tools Hunting and fishing                         |
| Kusutkau | Oenocarpus bataua         | Palm heart Human food Food                                         |
| Kusutkau | Oenocarpus bataua         | Stem Other Miscellaneous                                           |
| Kusutkau | Oenocarpus mapora         | Fruit Cultural Cosmetic                                            |
| Kusutkau | Oenocarpus mapora         | Fruit Human food Beverages                                         |
| Kusutkau | Oenocarpus mapora         | Fruit Human food Food                                              |
| Kusutkau | Oenocarpus mapora         | Fruit Human food Oils                                              |
| Kusutkau | Oenocarpus mapora         | Palm heart Human food Food                                         |
| Kusutkau | Oenocarpus mapora         | Stem Construction Houses                                           |
| Kusutkau | Oenocarpus mapora         | Stem Other Miscellaneous                                           |
| Kusutkau | Pholidostachys synanthera | Entire leaf Construction Thatch                                    |
| Kusutkau | Phytelephas tenuicaulis   | Entire leaf Construction Thatch                                    |
| Kusutkau | Phytelephas tenuicaulis   | Palm heart Human food Food                                         |
| Kusutkau | Phytelephas tenuicaulis   | Seed Human food Food                                               |
| Kusutkau | Phytelephas tenuicaulis   | Stem Other Miscellaneous                                           |
| Kusutkau | Socratea exorrhiza        | Root Utensils & tools Domestic utensils                            |
| Kusutkau | Socratea exorrhiza        | Stem Construction Houses                                           |
| Kusutkau | Socratea exorrhiza        | Stem Construction Thatch                                           |
| Kusutkau | Socratea exorrhiza        | Stem Other Miscellaneous                                           |
| Kapawi   | Aiphanes ulei             | Palm heart Medicinal & veterinary Blood and Cardio-vascular system |
| Kapawi   | Aiphanes ulei             | Palm heart Medicinal & veterinary Dental health                    |
| Kapawi   | Aphandra natalia          | Entire leaf Construction Thatch                                    |
| Kapawi   | Aphandra natalia          | Fruit Cultural Cosmetic                                            |
| Kapawi   | Aphandra natalia          | Leaf sheath Utensils & tools Domestic utensils                     |
| Kapawi   | Aphandra natalia          | Palm heart Human food Food                                         |
| Kapawi   | Aphandra natalia          | Seed Human food Food                                               |
| Kapawi   | Aphandra natalia          | Seed Utensils & tools Other                                        |
| Kapawi   | Aphandra natalia          | Spear leaf Utensils & tools Hunting and fishing                    |
| Kapawi   | Aphandra natalia          | Stem Other Miscellaneous                                           |
| Kapawi   | Astrocaryum chambira      | Palm heart Human food Food                                         |
| Kapawi   | Astrocaryum chambira      | Petiole Utensils & tools Domestic utensils                         |
| Kapawi   | Astrocaryum chambira      | Seed Human food Food                                               |
| Kapawi   | Astrocaryum chambira      | Spear leaf Cultural Clothes and accessories                        |
| Kapawi   | Astrocaryum chambira      | Spear leaf Cultural Personal adornment                             |
| Kapawi   | Astrocaryum chambira      | Spear leaf Utensils & tools Domestic utensils                      |
| Kapawi   | Astrocaryum chambira      | Spear leaf Utensils & tools Hunting and fishing                    |
| Kapawi   | Astrocaryum chambira      | Spear leaf Utensils & tools Rope                                   |
| Kapawi   | Astrocaryum chambira      | Stem Other Miscellaneous                                           |
| Kapawi   | Astrocaryum jauari        | Fruit Animal food Fish bait                                        |
| Kapawi   | Astrocaryum jauari        | Spines Medicinal & veterinary Skin and subcutaneous tissue         |
| Kapawi   | Astrocaryum jauari        | Stem Construction Houses                                           |
| Kapawi   | Astrocaryum urostachys    | Palm heart Human food Food                                         |
| Kapawi   | Astrocaryum urostachys    | Petiole Utensils & tools Domestic utensils                         |
| Kapawi   | Astrocaryum urostachys    | Seed Human food Food                                               |
| Kapawi   | Astrocaryum urostachys    | Spear leaf Construction Thatch                                     |
| Kapawi   | Astrocaryum urostachys    | Spear leaf Cultural Ritual                                         |
| Kapawi   | Astrocaryum urostachys    | Stem Construction Houses                                           |
| Kapawi   | Astrocaryum urostachys    | Stem Other Miscellaneous                                           |
| Kapawi   | Attalea bassleriana       | Palm heart Human food Food                                         |
| Kapawi   | Attalea bassleriana       | Petiole Utensils & tools Hunting and fishing                       |
| Kapawi   | Attalea bassleriana       | Seed Human food Food                                               |
| Kapawi   | Attalea bassleriana       | Seed Other Miscellaneous                                           |
| Kapawi   | Attalea bassleriana       | Stem Other Miscellaneous                                           |
| Kapawi   | Attalea maripa            | Fruit Human food Food                                              |
| Kapawi   | Attalea maripa            | Palm heart Human food Food                                         |
| Kapawi   | Attalea maripa            | Petiole Utensils & tools Hunting and fishing                       |
| Kapawi   | Attalea maripa            | Seed Other Miscellaneous                                           |
| Kapawi   | Attalea maripa            | Stem Other Miscellaneous                                           |
| Kapawi   | Bactris concinna          | Entire leaf Utensils & tools Domestic utensils                     |
| Kapawi   | Bactris concinna          | Seed Human food Food                                               |
| Kapawi   | Bactris concinna          | Stem Construction Houses                                           |
| Kapawi   | Bactris corossilla        | Entire leaf Utensils & tools Labour tools                          |
| Kapawi   | Bactris corossilla        | Palm heart Medicinal & veterinary Blood and Cardio-vascular system |
| Kapawi   | Bactris corossilla        | Seed Human food Food                                               |
| Kapawi   | Bactris corossilla        | Stem Construction Houses                                           |
| Kapawi   | Bactris corossilla        | Stem Utensils & tools Hunting and fishing                          |
| Kapawi   | Bactris corossilla        | Stem Utensils & tools Labour tools                                 |
| Kapawi   | Bactris maraja            | Entire leaf Utensils & tools Labour tools                          |
| Kapawi   | Bactris maraja            | Palm heart Medicinal & veterinary Blood and Cardio-vascular system |
| Kapawi   | Bactris maraja            | Seed Human food Food                                               |
| Kapawi   | Bactris maraja            | Stem Construction Houses                                           |
| Kapawi   | Bactris maraja            | Stem Utensils & tools Labour tools                                 |
| Kapawi   | Chamaedorea pauciflora    | Flower Cultural Cosmetic                                           |
| Kapawi   | Elaeis oleifera           | Fruit Human food Oils                                              |
| Kapawi   | Elaeis oleifera           | Palm heart Human food Food                                         |
| Kapawi   | Elaeis oleifera           | Petiole Utensils & tools Hunting and fishing                       |
| Kapawi   | Elaeis oleifera           | Seed Human food Food                                               |
| Kapawi   | Euterpe precatoria        | Fruit Cultural Cosmetic                                            |
| Kapawi   | Euterpe precatoria        | Fruit Human food Food                                              |
| Kapawi   | Euterpe precatoria        | Palm heart Human food Food                                         |

|          |                                  |                                                |
|----------|----------------------------------|------------------------------------------------|
| Kapawi   | <i>Euterpe precatoria</i>        | Root Cultural Cosmetic                         |
| Kapawi   | <i>Euterpe precatoria</i>        | Stem Construction Houses                       |
| Kapawi   | <i>Euterpe precatoria</i>        | Stem Other Miscellaneous                       |
| Kapawi   | <i>Geonoma deversa</i>           | Entire leaf Construction Thatch                |
| Kapawi   | <i>Geonoma longepedunculata</i>  | Entire leaf Construction Thatch                |
| Kapawi   | <i>Geonoma macrostachys</i>      | Entire leaf Construction Thatch                |
| Kapawi   | <i>Geonoma stricta</i>           | Entire leaf Construction Thatch                |
| Kapawi   | <i>Hyospathe elegans</i>         | Entire leaf Construction Thatch                |
| Kapawi   | <i>Hyospathe elegans</i>         | Entire leaf Utensils & tools Wrappers          |
| Kapawi   | <i>Hyospathe elegans</i>         | Root Utensils & tools Domestic utensils        |
| Kapawi   | <i>Iriartea deltoidea</i>        | Entire leaf Construction Thatch                |
| Kapawi   | <i>Iriartea deltoidea</i>        | Entire leaf Utensils & tools Wrappers          |
| Kapawi   | <i>Iriartea deltoidea</i>        | Palm heart Human food Food                     |
| Kapawi   | <i>Iriartea deltoidea</i>        | Seed Human food Food                           |
| Kapawi   | <i>Iriartea deltoidea</i>        | Stem Construction Houses                       |
| Kapawi   | <i>Iriartea deltoidea</i>        | Stem Construction Thatch                       |
| Kapawi   | <i>Iriartea deltoidea</i>        | Stem Other Miscellaneous                       |
| Kapawi   | <i>Iriartea deltoidea</i>        | Stem Utensils & tools Domestic utensils        |
| Kapawi   | <i>Iriartea deltoidea</i>        | Stem Utensils & tools Hunting and fishing      |
| Kapawi   | <i>Mauritia flexuosa</i>         | Entire leaf Medicinal & veterinary Other       |
| Kapawi   | <i>Mauritia flexuosa</i>         | Fruit Cultural Cosmetic                        |
| Kapawi   | <i>Mauritia flexuosa</i>         | Fruit Human food Beverages                     |
| Kapawi   | <i>Mauritia flexuosa</i>         | Fruit Human food Food                          |
| Kapawi   | <i>Mauritia flexuosa</i>         | Fruit Human food Oils                          |
| Kapawi   | <i>Mauritia flexuosa</i>         | Leaf rachis Utensils & tools Domestic utensils |
| Kapawi   | <i>Mauritia flexuosa</i>         | Palm heart Human food Food                     |
| Kapawi   | <i>Mauritia flexuosa</i>         | Spear leaf Utensils & tools Rope               |
| Kapawi   | <i>Mauritia flexuosa</i>         | Stem Other Miscellaneous                       |
| Kapawi   | <i>Mauritiella armata</i>        | Entire leaf Construction Thatch                |
| Kapawi   | <i>Mauritiella armata</i>        | Entire leaf Utensils & tools Domestic utensils |
| Kapawi   | <i>Oenocarpus bataua</i>         | Entire leaf Construction Thatch                |
| Kapawi   | <i>Oenocarpus bataua</i>         | Entire leaf Utensils & tools Domestic utensils |
| Kapawi   | <i>Oenocarpus bataua</i>         | Fruit Cultural Cosmetic                        |
| Kapawi   | <i>Oenocarpus bataua</i>         | Fruit Human food Beverages                     |
| Kapawi   | <i>Oenocarpus bataua</i>         | Fruit Human food Food                          |
| Kapawi   | <i>Oenocarpus bataua</i>         | Fruit Human food Oils                          |
| Kapawi   | <i>Oenocarpus bataua</i>         | Leaf sheath Cultural Personal adornment        |
| Kapawi   | <i>Oenocarpus bataua</i>         | Palm heart Human food Food                     |
| Kapawi   | <i>Oenocarpus bataua</i>         | Stem Other Miscellaneous                       |
| Kapawi   | <i>Oenocarpus mapora</i>         | Entire leaf Construction Thatch                |
| Kapawi   | <i>Oenocarpus mapora</i>         | Fruit Cultural Cosmetic                        |
| Kapawi   | <i>Oenocarpus mapora</i>         | Fruit Human food Beverages                     |
| Kapawi   | <i>Oenocarpus mapora</i>         | Fruit Human food Food                          |
| Kapawi   | <i>Oenocarpus mapora</i>         | Fruit Human food Oils                          |
| Kapawi   | <i>Oenocarpus mapora</i>         | Palm heart Human food Food                     |
| Kapawi   | <i>Oenocarpus mapora</i>         | Stem Construction Houses                       |
| Kapawi   | <i>Oenocarpus mapora</i>         | Stem Utensils & tools Domestic utensils        |
| Kapawi   | <i>Pholidostachys synanthera</i> | Entire leaf Construction Thatch                |
| Kapawi   | <i>Phytelephas tenuicaulis</i>   | Entire leaf Construction Thatch                |
| Kapawi   | <i>Phytelephas tenuicaulis</i>   | Palm heart Human food Food                     |
| Kapawi   | <i>Phytelephas tenuicaulis</i>   | Seed Human food Food                           |
| Kapawi   | <i>Phytelephas tenuicaulis</i>   | Stem Other Miscellaneous                       |
| Kapawi   | <i>Socratea exorrhiza</i>        | Entire leaf Construction Thatch                |
| Kapawi   | <i>Socratea exorrhiza</i>        | Root Utensils & tools Domestic utensils        |
| Kapawi   | <i>Socratea exorrhiza</i>        | Stem Construction Houses                       |
| Kapawi   | <i>Socratea exorrhiza</i>        | Stem Construction Thatch                       |
| Kapawi   | <i>Socratea exorrhiza</i>        | Stem Other Miscellaneous                       |
| Kapawi   | <i>Socratea exorrhiza</i>        | Stem Utensils & tools Hunting and fishing      |
| Juisanoy | <i>Ceroxylon ventricosum</i>     | Spear leaf Cultural Ritual                     |
| Juisanoy | <i>Ceroxylon ventricosum</i>     | Spear leaf Utensils & tools Domestic utensils  |
| Juisanoy | <i>Ceroxylon ventricosum</i>     | Stem Construction Bridges                      |
| Juisanoy | <i>Ceroxylon ventricosum</i>     | Stem Construction Houses                       |
| Juisanoy | <i>Ceroxylon ventricosum</i>     | Stem Construction Other                        |
| Juisanoy | <i>Ceroxylon ventricosum</i>     | Stem Fuel Firewood                             |
| Juisanoy | <i>Ceroxylon vogelianum</i>      | Spear leaf Cultural Ritual                     |
| Juisanoy | <i>Ceroxylon vogelianum</i>      | Spear leaf Utensils & tools Domestic utensils  |
| Juisanoy | <i>Ceroxylon vogelianum</i>      | Stem Construction Bridges                      |
| Juisanoy | <i>Ceroxylon vogelianum</i>      | Stem Construction Houses                       |
| Juisanoy | <i>Ceroxylon vogelianum</i>      | Stem Construction Other                        |
| Juisanoy | <i>Ceroxylon vogelianum</i>      | Stem Environmental Fences                      |
| Juisanoy | <i>Ceroxylon vogelianum</i>      | Stem Fuel Firewood                             |
| Juisanoy | <i>Chamaedorea pinnatifrons</i>  | Root Utensils & tools Domestic utensils        |
| Juisanoy | <i>Euterpe precatoria</i>        | Root Medicinal & veterinary Urinary system     |
| Juisanoy | <i>Geonoma undata</i>            | Entire leaf Construction Thatch                |
| Juisanoy | <i>Geonoma undata</i>            | Spear leaf Cultural Ritual                     |
| Juisanoy | <i>Geonoma undata</i>            | Spear leaf Utensils & tools Domestic utensils  |
| Juisanoy | <i>Geonoma undata</i>            | Stem Construction Houses                       |
| Juisanoy | <i>Iriartea deltoidea</i>        | Stem Construction Houses                       |
| Juisanoy | <i>Oenocarpus bataua</i>         | Fruit Human food Beverages                     |
| Juisanoy | <i>Prestoea acuminata</i>        | Entire leaf Construction Thatch                |
| Juisanoy | <i>Prestoea acuminata</i>        | Palm heart Human food Food                     |
| Juisanoy | <i>Prestoea acuminata</i>        | Root Medicinal & veterinary Urinary system     |
| Juisanoy | <i>Prestoea acuminata</i>        | Spear leaf Utensils & tools Domestic utensils  |
| Juisanoy | <i>Prestoea acuminata</i>        | Stem Construction Houses                       |
| Juisanoy | <i>Prestoea acuminata</i>        | Stem Fuel Firewood                             |
| Irimo    | <i>Aiphanes horrida</i>          | Fruit Human food Food                          |
| Irimo    | <i>Aiphanes horrida</i>          | Seed Human food Food                           |

|             |                           |                                                                        |
|-------------|---------------------------|------------------------------------------------------------------------|
| Irimo       | Aiphanes horrida          | Spines Medicinal & veterinary Cultural diseases and disorders          |
| Irimo       | Aiphanes horrida          | Stem Construction Houses                                               |
| Irimo       | Astrocaryum gratum        | Entire leaf Construction Thatch                                        |
| Irimo       | Astrocaryum gratum        | Fruit Animal food Fish bait                                            |
| Irimo       | Astrocaryum gratum        | Fruit Cultural Personal adornment                                      |
| Irimo       | Astrocaryum gratum        | Fruit Human food Food                                                  |
| Irimo       | Astrocaryum gratum        | Fruit Medicinal & veterinary Blood and Cardio-vascular system          |
| Irimo       | Astrocaryum gratum        | Seed Human food Food                                                   |
| Irimo       | Astrocaryum gratum        | Seed Medicinal & veterinary Digestive system                           |
| Irimo       | Astrocaryum gratum        | Seed Other Miscellaneous                                               |
| Irimo       | Astrocaryum gratum        | Spines Medicinal & veterinary Cultural diseases and disorders          |
| Irimo       | Astrocaryum gratum        | Spines Medicinal & veterinary Skin and subcutaneous tissue             |
| Irimo       | Astrocaryum gratum        | Stem Other Miscellaneous                                               |
| Irimo       | Ceroxylon pityrophyllum   | Fruit Cultural Recreational                                            |
| Irimo       | Chamaedorea angustisecta  | Entire leaf Construction Thatch                                        |
| Irimo       | Chamaedorea angustisecta  | Flower Cultural Cosmetic                                               |
| Irimo       | Chamaedorea angustisecta  | Flower Medicinal & veterinary Dental health                            |
| Irimo       | Chamaedorea angustisecta  | Flower Medicinal & veterinary Digestive system                         |
| Irimo       | Chamaedorea angustisecta  | Flower Medicinal & veterinary Respiratory system                       |
| Irimo       | Chamaedorea angustisecta  | Fruit Medicinal & veterinary General Ailments with Unspecific Symptoms |
| Irimo       | Chamaedorea angustisecta  | Fruit Medicinal & veterinary Reproductive system and sex health        |
| Irimo       | Dictyocaryum lamarckianum | Entire leaf Construction Thatch                                        |
| Irimo       | Dictyocaryum lamarckianum | Fruit Cultural Recreational                                            |
| Irimo       | Dictyocaryum lamarckianum | Leaf sheath Utensils & tools Domestic utensils                         |
| Irimo       | Dictyocaryum lamarckianum | Palm heart Human food Food                                             |
| Irimo       | Dictyocaryum lamarckianum | Stem Construction Houses                                               |
| Irimo       | Dictyocaryum lamarckianum | Stem Utensils & tools Domestic utensils                                |
| Irimo       | Dictyocaryum lamarckianum | Stem Utensils & tools Rope                                             |
| Irimo       | Euterpe precatória        | Entire leaf Construction Thatch                                        |
| Irimo       | Euterpe precatória        | Entire leaf Cultural Ritual                                            |
| Irimo       | Euterpe precatória        | Fruit Human food Beverages                                             |
| Irimo       | Euterpe precatória        | Leaf rachis Utensils & tools Domestic utensils                         |
| Irimo       | Euterpe precatória        | Palm heart Human food Food                                             |
| Irimo       | Euterpe precatória        | Spear leaf Cultural Clothes and accessories                            |
| Irimo       | Euterpe precatória        | Stem Construction Houses                                               |
| Irimo       | Euterpe precatória        | Stem Cultural Recreational                                             |
| Irimo       | Euterpe precatória        | Stem Utensils & tools Domestic utensils                                |
| Irimo       | Geonoma deversa           | Entire leaf Construction Thatch                                        |
| Irimo       | Geonoma undata            | Entire leaf Construction Thatch                                        |
| Irimo       | Geonoma undata            | Stem Cultural Clothes and accessories                                  |
| Irimo       | Iriarteia deltoidea       | Entire leaf Construction Thatch                                        |
| Irimo       | Iriarteia deltoidea       | Palm heart Human food Food                                             |
| Irimo       | Iriarteia deltoidea       | Stem Construction Houses                                               |
| Irimo       | Iriarteia deltoidea       | Stem Construction Thatch                                               |
| Irimo       | Iriarteia deltoidea       | Stem Other Miscellaneous                                               |
| Irimo       | Iriarteia deltoidea       | Stem Utensils & tools Domestic utensils                                |
| Irimo       | Iriarteia deltoidea       | Stem Utensils & tools Rope                                             |
| Irimo       | Oenocarpus bataua         | Entire leaf Construction Thatch                                        |
| Irimo       | Oenocarpus bataua         | Fruit Cultural Cosmetic                                                |
| Irimo       | Oenocarpus bataua         | Fruit Human food Beverages                                             |
| Irimo       | Oenocarpus bataua         | Fruit Human food Oils                                                  |
| Irimo       | Oenocarpus bataua         | Fruit Medicinal & veterinary Digestive system                          |
| Irimo       | Oenocarpus bataua         | Fruit Medicinal & veterinary General Ailments with Unspecific Symptoms |
| Irimo       | Oenocarpus bataua         | Fruit Medicinal & veterinary Respiratory system                        |
| Irimo       | Oenocarpus bataua         | Fruit Utensils & tools Domestic utensils                               |
| Irimo       | Oenocarpus bataua         | Fruit Utensils & tools Hunting and fishing                             |
| Irimo       | Oenocarpus bataua         | Leaf rachis Utensils & tools Domestic utensils                         |
| Irimo       | Oenocarpus bataua         | Palm heart Human food Food                                             |
| Irimo       | Oenocarpus bataua         | Spear leaf Cultural Clothes and accessories                            |
| Irimo       | Oenocarpus bataua         | Spear leaf Utensils & tools Domestic utensils                          |
| Irimo       | Oenocarpus bataua         | Stem Construction Houses                                               |
| Irimo       | Oenocarpus bataua         | Stem Fuel Firewood                                                     |
| Irimo       | Oenocarpus bataua         | Stem Other Miscellaneous                                               |
| Irimo       | Socratea exorrhiza        | Entire leaf Construction Thatch                                        |
| Irimo       | Socratea exorrhiza        | Palm heart Human food Food                                             |
| Irimo       | Socratea exorrhiza        | Root Construction Houses                                               |
| Irimo       | Socratea exorrhiza        | Root Medicinal & veterinary Infections and infestations                |
| Irimo       | Socratea exorrhiza        | Spear leaf Medicinal & veterinary Cultural diseases and disorders      |
| Irimo       | Socratea exorrhiza        | Stem Construction Houses                                               |
| Irimo       | Socratea exorrhiza        | Stem Other Miscellaneous                                               |
| Irimo       | Socratea exorrhiza        | Stem Utensils & tools Domestic utensils                                |
| Irimo       | Socratea exorrhiza        | Stem Utensils & tools Hunting and fishing                              |
| Irimo       | Socratea exorrhiza        | Stem Utensils & tools Rope                                             |
| Ilipanayuyo | Aiphanes horrida          | Seed Human food Food                                                   |
| Ilipanayuyo | Aiphanes horrida          | Stem Utensils & tools Labour tools                                     |
| Ilipanayuyo | Astrocaryum gratum        | Fruit Cultural Personal adornment                                      |
| Ilipanayuyo | Astrocaryum gratum        | Fruit Human food Food                                                  |
| Ilipanayuyo | Ceroxylon parvum          | Spear leaf Cultural Ritual                                             |
| Ilipanayuyo | Chamaedorea angustisecta  | Flower Medicinal & veterinary Digestive system                         |
| Ilipanayuyo | Chamaedorea pinnatifrons  | Entire leaf Utensils & tools Wrappers                                  |
| Ilipanayuyo | Chamaedorea pinnatifrons  | Seed Medicinal & veterinary Digestive system                           |
| Ilipanayuyo | Dictyocaryum lamarckianum | Entire leaf Construction Thatch                                        |
| Ilipanayuyo | Dictyocaryum lamarckianum | Fruit Cultural Recreational                                            |
| Ilipanayuyo | Dictyocaryum lamarckianum | Leaf sheath Utensils & tools Domestic utensils                         |
| Ilipanayuyo | Dictyocaryum lamarckianum | Palm heart Human food Food                                             |
| Ilipanayuyo | Dictyocaryum lamarckianum | Stem Construction Houses                                               |
| Ilipanayuyo | Dictyocaryum lamarckianum | Stem Utensils & tools Domestic utensils                                |

|              |                      |                                                             |
|--------------|----------------------|-------------------------------------------------------------|
| Ilippanayuyo | Euterpe precatoria   | Fruit Human food Beverages                                  |
| Ilippanayuyo | Euterpe precatoria   | Palm heart Human food Food                                  |
| Ilippanayuyo | Euterpe precatoria   | Stem Construction Houses                                    |
| Ilippanayuyo | Euterpe precatoria   | Stem Utensils & tools Domestic utensils                     |
| Ilippanayuyo | Euterpe precatoria   | Stem Utensils & tools Hunting and fishing                   |
| Ilippanayuyo | Euterpe precatoria   | Stem Utensils & tools Rope                                  |
| Ilippanayuyo | Geonoma deversa      | Entire leaf Construction Thatch                             |
| Ilippanayuyo | Geonoma undata       | Entire leaf Construction Thatch                             |
| Ilippanayuyo | Geonoma undata       | Stem Construction Houses                                    |
| Ilippanayuyo | Iriartea deltoidea   | Entire leaf Construction Thatch                             |
| Ilippanayuyo | Iriartea deltoidea   | Fruit Cultural Recreational                                 |
| Ilippanayuyo | Iriartea deltoidea   | Palm heart Human food Food                                  |
| Ilippanayuyo | Iriartea deltoidea   | Stem Construction Houses                                    |
| Ilippanayuyo | Iriartea deltoidea   | Stem Construction Other                                     |
| Ilippanayuyo | Iriartea deltoidea   | Stem Construction Thatch                                    |
| Ilippanayuyo | Iriartea deltoidea   | Stem Utensils & tools Labour tools                          |
| Ilippanayuyo | Iriartea deltoidea   | Stem Utensils & tools Rope                                  |
| Ilippanayuyo | Oenocarpus bataua    | Entire leaf Construction Thatch                             |
| Ilippanayuyo | Oenocarpus bataua    | Fruit Cultural Cosmetic                                     |
| Ilippanayuyo | Oenocarpus bataua    | Fruit Human food Beverages                                  |
| Ilippanayuyo | Oenocarpus bataua    | Fruit Medicinal & veterinary Respiratory system             |
| Ilippanayuyo | Oenocarpus bataua    | Leaf rachis Utensils & tools Domestic utensils              |
| Ilippanayuyo | Oenocarpus bataua    | Palm heart Human food Food                                  |
| Ilippanayuyo | Oenocarpus bataua    | Root Medicinal & veterinary Pregnancy, birth and puerperial |
| Ilippanayuyo | Oenocarpus bataua    | Seed Medicinal & veterinary Cultural diseases and disorders |
| Ilippanayuyo | Oenocarpus bataua    | Spear leaf Cultural Clothes and accessories                 |
| Ilippanayuyo | Oenocarpus bataua    | Spear leaf Utensils & tools Domestic utensils               |
| Ilippanayuyo | Oenocarpus bataua    | Stem Other Miscellaneous                                    |
| Ilippanayuyo | Socratea exorrhiza   | Entire leaf Construction Thatch                             |
| Ilippanayuyo | Socratea exorrhiza   | Fruit Cultural Recreational                                 |
| Ilippanayuyo | Socratea exorrhiza   | Root Medicinal & veterinary Digestive system                |
| Ilippanayuyo | Socratea exorrhiza   | Root Medicinal & veterinary Skin and subcutaneous tissue    |
| Ilippanayuyo | Socratea exorrhiza   | Stem Construction Houses                                    |
| Ilippanayuyo | Socratea exorrhiza   | Stem Construction Other                                     |
| Ilippanayuyo | Socratea exorrhiza   | Stem Construction Thatch                                    |
| El Chino     | Aphandra natalia     | Entire leaf Construction Thatch                             |
| El Chino     | Aphandra natalia     | Fruit Human food Food                                       |
| El Chino     | Aphandra natalia     | Leaf rachis Utensils & tools Domestic utensils              |
| El Chino     | Aphandra natalia     | Leaf sheath Utensils & tools Domestic utensils              |
| El Chino     | Aphandra natalia     | Seed Human food Food                                        |
| El Chino     | Aphandra natalia     | Spear leaf Utensils & tools Domestic utensils               |
| El Chino     | Aphandra natalia     | Stem Utensils & tools Hunting and fishing                   |
| El Chino     | Astrocaryum chambira | Fruit Cultural Personal adornment                           |
| El Chino     | Astrocaryum chambira | Fruit Human food Food                                       |
| El Chino     | Astrocaryum chambira | Leaf rachis Utensils & tools Domestic utensils              |
| El Chino     | Astrocaryum chambira | Palm heart Human food Food                                  |
| El Chino     | Astrocaryum chambira | Seed Human food Food                                        |
| El Chino     | Astrocaryum chambira | Spear leaf Cultural Clothes and accessories                 |
| El Chino     | Astrocaryum chambira | Spear leaf Utensils & tools Domestic utensils               |
| El Chino     | Astrocaryum chambira | Spear leaf Utensils & tools Hunting and fishing             |
| El Chino     | Astrocaryum chambira | Spear leaf Utensils & tools Other                           |
| El Chino     | Astrocaryum chambira | Spear leaf Utensils & tools Rope                            |
| El Chino     | Astrocaryum chambira | Stem Other Miscellaneous                                    |
| El Chino     | Astrocaryum jauari   | Fruit Animal food Fish bait                                 |
| El Chino     | Astrocaryum jauari   | Fruit Human food Food                                       |
| El Chino     | Astrocaryum jauari   | Leaf rachis Utensils & tools Domestic utensils              |
| El Chino     | Astrocaryum jauari   | Petiole Utensils & tools Labour tools                       |
| El Chino     | Astrocaryum jauari   | Seed Human food Food                                        |
| El Chino     | Astrocaryum jauari   | Seed Other Miscellaneous                                    |
| El Chino     | Astrocaryum jauari   | Spear leaf Utensils & tools Domestic utensils               |
| El Chino     | Astrocaryum jauari   | Spear leaf Utensils & tools Labour tools                    |
| El Chino     | Astrocaryum jauari   | Stem Construction Houses                                    |
| El Chino     | Attalea bassleriana  | Bract Cultural Recreational                                 |
| El Chino     | Attalea bassleriana  | Bract Utensils & tools Domestic utensils                    |
| El Chino     | Attalea bassleriana  | Entire leaf Construction Thatch                             |
| El Chino     | Attalea bassleriana  | Fruit Human food Food                                       |
| El Chino     | Attalea bassleriana  | Palm heart Human food Food                                  |
| El Chino     | Attalea bassleriana  | Seed Human food Food                                        |
| El Chino     | Attalea bassleriana  | Seed Other Miscellaneous                                    |
| El Chino     | Attalea bassleriana  | Spear leaf Utensils & tools Domestic utensils               |
| El Chino     | Attalea bassleriana  | Stem Other Miscellaneous                                    |
| El Chino     | Attalea insignis     | Entire leaf Construction Thatch                             |
| El Chino     | Attalea insignis     | Fruit Human food Food                                       |
| El Chino     | Attalea insignis     | Seed Human food Food                                        |
| El Chino     | Attalea insignis     | Seed Other Miscellaneous                                    |
| El Chino     | Attalea insignis     | Stem Other Miscellaneous                                    |
| El Chino     | Attalea maripa       | Bract Cultural Recreational                                 |
| El Chino     | Attalea maripa       | Entire leaf Construction Thatch                             |
| El Chino     | Attalea maripa       | Fruit Human food Food                                       |
| El Chino     | Attalea maripa       | Leaf rachis Utensils & tools Domestic utensils              |
| El Chino     | Attalea maripa       | Leaf rachis Utensils & tools Hunting and fishing            |
| El Chino     | Attalea maripa       | Leaf rachis Utensils & tools Labour tools                   |
| El Chino     | Attalea maripa       | Petiole Utensils & tools Hunting and fishing                |
| El Chino     | Attalea maripa       | Seed Human food Food                                        |
| El Chino     | Attalea maripa       | Seed Other Miscellaneous                                    |
| El Chino     | Attalea maripa       | Spear leaf Cultural Clothes and accessories                 |
| El Chino     | Attalea maripa       | Spear leaf Utensils & tools Domestic utensils               |

|          |                        |                                                                        |
|----------|------------------------|------------------------------------------------------------------------|
| El Chino | Attalea maripa         | Stem Construction Houses                                               |
| El Chino | Attalea maripa         | Stem Utensils & tools Hunting and fishing                              |
| El Chino | Attalea microcarpa     | Entire leaf Construction Thatch                                        |
| El Chino | Attalea microcarpa     | Fruit Human food Food                                                  |
| El Chino | Attalea microcarpa     | Seed Human food Food                                                   |
| El Chino | Attalea microcarpa     | Seed Other Miscellaneous                                               |
| El Chino | Attalea peruviana      | Entire leaf Construction Thatch                                        |
| El Chino | Attalea peruviana      | Fruit Animal food Fish bait                                            |
| El Chino | Attalea peruviana      | Fruit Human food Food                                                  |
| El Chino | Attalea peruviana      | Palm heart Human food Food                                             |
| El Chino | Attalea peruviana      | Seed Human food Food                                                   |
| El Chino | Attalea peruviana      | Seed Other Miscellaneous                                               |
| El Chino | Attalea peruviana      | Spear leaf Cultural Clothes and accessories                            |
| El Chino | Attalea peruviana      | Spear leaf Utensils & tools Domestic utensils                          |
| El Chino | Attalea peruviana      | Stem Other Miscellaneous                                               |
| El Chino | Attalea tessmannii     | Entire leaf Construction Thatch                                        |
| El Chino | Attalea tessmannii     | Fruit Cultural Personal adornment                                      |
| El Chino | Attalea tessmannii     | Fruit Human food Food                                                  |
| El Chino | Attalea tessmannii     | Palm heart Human food Food                                             |
| El Chino | Attalea tessmannii     | Seed Human food Food                                                   |
| El Chino | Attalea tessmannii     | Seed Other Miscellaneous                                               |
| El Chino | Attalea tessmannii     | Stem Other Miscellaneous                                               |
| El Chino | Bactris bifida         | Fruit Animal food Fish bait                                            |
| El Chino | Bactris bifida         | Fruit Human food Food                                                  |
| El Chino | Bactris bifida         | Stem Cultural Clothes and accessories                                  |
| El Chino | Bactris bifida         | Stem Utensils & tools Domestic utensils                                |
| El Chino | Bactris brongniartii   | Fruit Animal food Fish bait                                            |
| El Chino | Bactris brongniartii   | Fruit Human food Food                                                  |
| El Chino | Bactris concinna       | Fruit Animal food Fish bait                                            |
| El Chino | Bactris concinna       | Fruit Human food Food                                                  |
| El Chino | Bactris hirta          | Fruit Animal food Fish bait                                            |
| El Chino | Bactris hirta          | Fruit Human food Food                                                  |
| El Chino | Bactris maraja         | Fruit Animal food Fish bait                                            |
| El Chino | Bactris maraja         | Fruit Human food Food                                                  |
| El Chino | Bactris riparia        | Fruit Animal food Fish bait                                            |
| El Chino | Bactris riparia        | Fruit Human food Food                                                  |
| El Chino | Bactris riparia        | Stem Cultural Clothes and accessories                                  |
| El Chino | Chelyocarpus ulei      | Entire leaf Construction Thatch                                        |
| El Chino | Chelyocarpus ulei      | Spear leaf Cultural Clothes and accessories                            |
| El Chino | Chelyocarpus ulei      | Spear leaf Utensils & tools Domestic utensils                          |
| El Chino | Desmoncus giganteus    | Stem Cultural Clothes and accessories                                  |
| El Chino | Desmoncus giganteus    | Stem Medicinal & veterinary Digestive system                           |
| El Chino | Desmoncus giganteus    | Stem Medicinal & veterinary Urinary system                             |
| El Chino | Desmoncus giganteus    | Stem Utensils & tools Domestic utensils                                |
| El Chino | Desmoncus giganteus    | Stem Utensils & tools Other                                            |
| El Chino | Desmoncus giganteus    | Stem Utensils & tools Rope                                             |
| El Chino | Desmoncus polyacanthos | Stem Cultural Clothes and accessories                                  |
| El Chino | Desmoncus polyacanthos | Stem Medicinal & veterinary Digestive system                           |
| El Chino | Desmoncus polyacanthos | Stem Medicinal & veterinary Urinary system                             |
| El Chino | Desmoncus polyacanthos | Stem Utensils & tools Domestic utensils                                |
| El Chino | Desmoncus polyacanthos | Stem Utensils & tools Other                                            |
| El Chino | Desmoncus polyacanthos | Stem Utensils & tools Rope                                             |
| El Chino | Euterpe precatória     | Entire leaf Construction Thatch                                        |
| El Chino | Euterpe precatória     | Fruit Cultural Dyes                                                    |
| El Chino | Euterpe precatória     | Fruit Human food Beverages                                             |
| El Chino | Euterpe precatória     | Fruit Human food Food                                                  |
| El Chino | Euterpe precatória     | Fruit Medicinal & veterinary Blood and Cardio-vascular system          |
| El Chino | Euterpe precatória     | Fruit Medicinal & veterinary General Ailments with Unspecific Symptoms |
| El Chino | Euterpe precatória     | Palm heart Human food Food                                             |
| El Chino | Euterpe precatória     | Root Cultural Dyes                                                     |
| El Chino | Euterpe precatória     | Root Medicinal & veterinary Blood and Cardio-vascular system           |
| El Chino | Euterpe precatória     | Root Medicinal & veterinary Digestive system                           |
| El Chino | Euterpe precatória     | Root Medicinal & veterinary Endocrine system                           |
| El Chino | Euterpe precatória     | Root Medicinal & veterinary General Ailments with Unspecific Symptoms  |
| El Chino | Euterpe precatória     | Root Medicinal & veterinary Infections and infestations                |
| El Chino | Euterpe precatória     | Root Medicinal & veterinary Musculo-skeletal system                    |
| El Chino | Euterpe precatória     | Root Medicinal & veterinary Not specified at all                       |
| El Chino | Euterpe precatória     | Root Medicinal & veterinary Pregnancy, birth and puerperial            |
| El Chino | Euterpe precatória     | Root Medicinal & veterinary Reproductive system and sex health         |
| El Chino | Euterpe precatória     | Root Medicinal & veterinary Respiratory system                         |
| El Chino | Euterpe precatória     | Root Medicinal & veterinary Urinary system                             |
| El Chino | Euterpe precatória     | Seed Cultural Personal adornment                                       |
| El Chino | Euterpe precatória     | Spear leaf Cultural Dyes                                               |
| El Chino | Euterpe precatória     | Stem Construction Houses                                               |
| El Chino | Euterpe precatória     | Stem Construction Thatch                                               |
| El Chino | Euterpe precatória     | Stem Environmental Fences                                              |
| El Chino | Euterpe precatória     | Stem Utensils & tools Hunting and fishing                              |
| El Chino | Geonoma macrostachys   | Entire leaf Construction Thatch                                        |
| El Chino | Geonoma poeppigiana    | Entire leaf Construction Thatch                                        |
| El Chino | Iriartea deltoidea     | Entire leaf Construction Thatch                                        |
| El Chino | Iriartea deltoidea     | Palm heart Human food Food                                             |
| El Chino | Iriartea deltoidea     | Root Medicinal & veterinary Pregnancy, birth and puerperial            |
| El Chino | Iriartea deltoidea     | Seed Cultural Personal adornment                                       |
| El Chino | Iriartea deltoidea     | Stem Construction Houses                                               |
| El Chino | Iriartea deltoidea     | Stem Construction Thatch                                               |
| El Chino | Iriartea deltoidea     | Stem Construction Transportation                                       |
| El Chino | Iriartea deltoidea     | Stem Other Miscellaneous                                               |

|          |                        |                                                 |
|----------|------------------------|-------------------------------------------------|
| El Chino | Iriarte deltoidea      | Stem Utensils & tools Domestic utensils         |
| El Chino | Iriarte deltoidea      | Stem Utensils & tools Labour tools              |
| El Chino | Iriartella stenocarpa  | Stem Construction Houses                        |
| El Chino | Iriartella stenocarpa  | Stem Construction Thatch                        |
| El Chino | Iriartella stenocarpa  | Stem Utensils & tools Hunting and fishing       |
| El Chino | Lepidocaryum tenue     | Entire leaf Construction Thatch                 |
| El Chino | Lepidocaryum tenue     | Stem Construction Houses                        |
| El Chino | Mauritia flexuosa      | Entire leaf Construction Thatch                 |
| El Chino | Mauritia flexuosa      | Fruit Cultural Cosmetic                         |
| El Chino | Mauritia flexuosa      | Fruit Human food Beverages                      |
| El Chino | Mauritia flexuosa      | Fruit Human food Food                           |
| El Chino | Mauritia flexuosa      | Petiole Utensils & tools Domestic utensils      |
| El Chino | Mauritia flexuosa      | Seed Human food Food                            |
| El Chino | Mauritia flexuosa      | Spear leaf Cultural Clothes and accessories     |
| El Chino | Mauritia flexuosa      | Spear leaf Utensils & tools Domestic utensils   |
| El Chino | Mauritia flexuosa      | Stem Construction Houses                        |
| El Chino | Mauritia flexuosa      | Stem Other Miscellaneous                        |
| El Chino | Mauritiella armata     | Entire leaf Construction Thatch                 |
| El Chino | Mauritiella armata     | Fruit Human food Beverages                      |
| El Chino | Mauritiella armata     | Fruit Human food Food                           |
| El Chino | Mauritiella armata     | Petiole Utensils & tools Domestic utensils      |
| El Chino | Mauritiella armata     | Stem Construction Houses                        |
| El Chino | Mauritiella armata     | Stem Construction Thatch                        |
| El Chino | Mauritiella armata     | Stem Other Miscellaneous                        |
| El Chino | Oenocarpus balickii    | Fruit Human food Food                           |
| El Chino | Oenocarpus bataua      | Entire leaf Construction Thatch                 |
| El Chino | Oenocarpus bataua      | Fruit Animal food Fish bait                     |
| El Chino | Oenocarpus bataua      | Fruit Cultural Cosmetic                         |
| El Chino | Oenocarpus bataua      | Fruit Cultural Dyes                             |
| El Chino | Oenocarpus bataua      | Fruit Human food Beverages                      |
| El Chino | Oenocarpus bataua      | Fruit Human food Food                           |
| El Chino | Oenocarpus bataua      | Fruit Human food Oils                           |
| El Chino | Oenocarpus bataua      | Fruit Medicinal & veterinary Digestive system   |
| El Chino | Oenocarpus bataua      | Fruit Utensils & tools Hunting and fishing      |
| El Chino | Oenocarpus bataua      | Palm heart Human food Food                      |
| El Chino | Oenocarpus bataua      | Seed Other Miscellaneous                        |
| El Chino | Oenocarpus bataua      | Spear leaf Utensils & tools Domestic utensils   |
| El Chino | Oenocarpus bataua      | Stem Construction Houses                        |
| El Chino | Oenocarpus bataua      | Stem Other Miscellaneous                        |
| El Chino | Oenocarpus bataua      | Stem Utensils & tools Hunting and fishing       |
| El Chino | Oenocarpus mapora      | Entire leaf Construction Thatch                 |
| El Chino | Oenocarpus mapora      | Entire plant Cultural Ritual                    |
| El Chino | Oenocarpus mapora      | Fruit Cultural Personal adornment               |
| El Chino | Oenocarpus mapora      | Fruit Human food Beverages                      |
| El Chino | Oenocarpus mapora      | Fruit Human food Food                           |
| El Chino | Oenocarpus mapora      | Seed Other Miscellaneous                        |
| El Chino | Oenocarpus mapora      | Stem Construction Houses                        |
| El Chino | Oenocarpus mapora      | Stem Construction Thatch                        |
| El Chino | Oenocarpus mapora      | Stem Other Miscellaneous                        |
| El Chino | Phytelephas macrocarpa | Entire leaf Construction Thatch                 |
| El Chino | Phytelephas macrocarpa | Fruit Human food Food                           |
| El Chino | Phytelephas macrocarpa | Seed Cultural Other                             |
| El Chino | Phytelephas macrocarpa | Seed Cultural Personal adornment                |
| El Chino | Phytelephas macrocarpa | Seed Human food Food                            |
| El Chino | Socratea exorrhiza     | Entire leaf Construction Thatch                 |
| El Chino | Socratea exorrhiza     | Palm heart Human food Food                      |
| El Chino | Socratea exorrhiza     | Root Medicinal & veterinary Endocrine system    |
| El Chino | Socratea exorrhiza     | Root Utensils & tools Domestic utensils         |
| El Chino | Socratea exorrhiza     | Seed Cultural Personal adornment                |
| El Chino | Socratea exorrhiza     | Stem Construction Houses                        |
| El Chino | Socratea exorrhiza     | Stem Construction Thatch                        |
| El Chino | Socratea exorrhiza     | Stem Other Miscellaneous                        |
| El Chino | Socratea exorrhiza     | Stem Utensils & tools Hunting and fishing       |
| Dureno   | Aiphanes ulei          | Stem Utensils & tools Domestic utensils         |
| Dureno   | Astrocaryum chambira   | Fruit Cultural Personal adornment               |
| Dureno   | Astrocaryum chambira   | Palm heart Human food Food                      |
| Dureno   | Astrocaryum chambira   | Seed Human food Food                            |
| Dureno   | Astrocaryum chambira   | Spear leaf Cultural Clothes and accessories     |
| Dureno   | Astrocaryum chambira   | Spear leaf Cultural Personal adornment          |
| Dureno   | Astrocaryum chambira   | Spear leaf Utensils & tools Domestic utensils   |
| Dureno   | Astrocaryum chambira   | Spear leaf Utensils & tools Hunting and fishing |
| Dureno   | Astrocaryum chambira   | Spear leaf Utensils & tools Rope                |
| Dureno   | Astrocaryum chambira   | Stem Other Miscellaneous                        |
| Dureno   | Astrocaryum jauari     | Fruit Cultural Personal adornment               |
| Dureno   | Astrocaryum jauari     | Stem Other Miscellaneous                        |
| Dureno   | Astrocaryum urostachys | Fruit Cultural Personal adornment               |
| Dureno   | Astrocaryum urostachys | Palm heart Human food Food                      |
| Dureno   | Astrocaryum urostachys | Petiole Utensils & tools Hunting and fishing    |
| Dureno   | Astrocaryum urostachys | Seed Human food Food                            |
| Dureno   | Astrocaryum urostachys | Spear leaf Cultural Clothes and accessories     |
| Dureno   | Astrocaryum urostachys | Stem Construction Houses                        |
| Dureno   | Attalea butyracea      | Entire leaf Construction Thatch                 |
| Dureno   | Attalea butyracea      | Entire leaf Utensils & tools Wrappers           |
| Dureno   | Attalea butyracea      | Seed Other Miscellaneous                        |
| Dureno   | Attalea butyracea      | Stem Other Miscellaneous                        |
| Dureno   | Attalea insignis       | Petiole Utensils & tools Hunting and fishing    |
| Dureno   | Attalea maripa         | Fruit Cultural Personal adornment               |

|        |                         |                                                           |
|--------|-------------------------|-----------------------------------------------------------|
| Dureno | Attalea maripa          | Fruit Human food Food                                     |
| Dureno | Attalea maripa          | Petiole Utensils & tools Hunting and fishing              |
| Dureno | Attalea maripa          | Petiole Utensils & tools Labour tools                     |
| Dureno | Attalea maripa          | Seed Other Miscellaneous                                  |
| Dureno | Attalea maripa          | Stem Other Miscellaneous                                  |
| Dureno | Attalea maripa          | Stem Utensils & tools Domestic utensils                   |
| Dureno | Bactris corossilla      | Seed Cultural Personal adornment                          |
| Dureno | Bactris corossilla      | Stem Utensils & tools Domestic utensils                   |
| Dureno | Bactris corossilla      | Stem Utensils & tools Hunting and fishing                 |
| Dureno | Bactris maraja          | Seed Cultural Personal adornment                          |
| Dureno | Bactris maraja          | Seed Human food Food                                      |
| Dureno | Bactris maraja          | Stem Utensils & tools Domestic utensils                   |
| Dureno | Bactris maraja          | Stem Utensils & tools Hunting and fishing                 |
| Dureno | Desmoncus mitis         | Seed Cultural Personal adornment                          |
| Dureno | Desmoncus polyacanthos  | Seed Cultural Personal adornment                          |
| Dureno | Euterpe precatoria      | Fruit Human food Food                                     |
| Dureno | Euterpe precatoria      | Palm heart Human food Food                                |
| Dureno | Euterpe precatoria      | Root Medicinal & veterinary Dental health                 |
| Dureno | Euterpe precatoria      | Seed Cultural Personal adornment                          |
| Dureno | Euterpe precatoria      | Stem Construction Houses                                  |
| Dureno | Euterpe precatoria      | Stem Utensils & tools Hunting and fishing                 |
| Dureno | Geonoma brongniartii    | Entire leaf Construction Thatch                           |
| Dureno | Geonoma camana          | Entire leaf Construction Thatch                           |
| Dureno | Geonoma deversa         | Entire leaf Construction Thatch                           |
| Dureno | Geonoma macrostachys    | Entire leaf Construction Thatch                           |
| Dureno | Geonoma macrostachys    | Entire leaf Utensils & tools Wrappers                     |
| Dureno | Geonoma maxima          | Entire leaf Construction Thatch                           |
| Dureno | Geonoma stricta         | Entire leaf Construction Thatch                           |
| Dureno | Hyospathe elegans       | Palm heart Cultural Dyes                                  |
| Dureno | Hyospathe elegans       | Palm heart Medicinal & veterinary Dental health           |
| Dureno | Iriarteia deltoidea     | Entire leaf Construction Thatch                           |
| Dureno | Iriarteia deltoidea     | Palm heart Human food Food                                |
| Dureno | Iriarteia deltoidea     | Root Cultural Ritual                                      |
| Dureno | Iriarteia deltoidea     | Seed Cultural Personal adornment                          |
| Dureno | Iriarteia deltoidea     | Seed Human food Food                                      |
| Dureno | Iriarteia deltoidea     | Stem Construction Houses                                  |
| Dureno | Iriarteia deltoidea     | Stem Construction Thatch                                  |
| Dureno | Iriarteia deltoidea     | Stem Construction Transportation                          |
| Dureno | Iriarteia deltoidea     | Stem Environmental Fences                                 |
| Dureno | Iriarteia deltoidea     | Stem Fuel Firewood                                        |
| Dureno | Iriarteia deltoidea     | Stem Other Miscellaneous                                  |
| Dureno | Iriarteia deltoidea     | Stem Utensils & tools Domestic utensils                   |
| Dureno | Iriarteia deltoidea     | Stem Utensils & tools Hunting and fishing                 |
| Dureno | Mauritia flexuosa       | Fruit Human food Beverages                                |
| Dureno | Mauritia flexuosa       | Fruit Human food Food                                     |
| Dureno | Mauritia flexuosa       | Palm heart Human food Food                                |
| Dureno | Mauritia flexuosa       | Spear leaf Cultural Clothes and accessories               |
| Dureno | Mauritia flexuosa       | Spear leaf Utensils & tools Hunting and fishing           |
| Dureno | Mauritia flexuosa       | Stem Other Miscellaneous                                  |
| Dureno | Mauritiella armata      | Entire leaf Construction Thatch                           |
| Dureno | Mauritiella armata      | Stem Construction Houses                                  |
| Dureno | Mauritiella armata      | Stem Utensils & tools Hunting and fishing                 |
| Dureno | Oenocarpus bataua       | Entire leaf Construction Thatch                           |
| Dureno | Oenocarpus bataua       | Entire leaf Utensils & tools Domestic utensils            |
| Dureno | Oenocarpus bataua       | Entire leaf Utensils & tools Wrappers                     |
| Dureno | Oenocarpus bataua       | Fruit Cultural Cosmetic                                   |
| Dureno | Oenocarpus bataua       | Fruit Human food Beverages                                |
| Dureno | Oenocarpus bataua       | Fruit Human food Food                                     |
| Dureno | Oenocarpus bataua       | Fruit Medicinal & veterinary Skin and subcutaneous tissue |
| Dureno | Oenocarpus bataua       | Leaf sheath Utensils & tools Hunting and fishing          |
| Dureno | Oenocarpus bataua       | Palm heart Human food Food                                |
| Dureno | Oenocarpus bataua       | Seed Cultural Personal adornment                          |
| Dureno | Oenocarpus bataua       | Stem Other Miscellaneous                                  |
| Dureno | Oenocarpus mapora       | Entire leaf Construction Thatch                           |
| Dureno | Oenocarpus mapora       | Fruit Human food Beverages                                |
| Dureno | Oenocarpus mapora       | Fruit Human food Food                                     |
| Dureno | Oenocarpus mapora       | Petiole Utensils & tools Domestic utensils                |
| Dureno | Oenocarpus mapora       | Stem Construction Houses                                  |
| Dureno | Oenocarpus mapora       | Stem Utensils & tools Domestic utensils                   |
| Dureno | Oenocarpus mapora       | Stem Utensils & tools Hunting and fishing                 |
| Dureno | Phytelephas tenuicaulis | Entire leaf Construction Thatch                           |
| Dureno | Phytelephas tenuicaulis | Seed Cultural Personal adornment                          |
| Dureno | Phytelephas tenuicaulis | Seed Human food Beverages                                 |
| Dureno | Phytelephas tenuicaulis | Seed Human food Food                                      |
| Dureno | Phytelephas tenuicaulis | Seed Utensils & tools Other                               |
| Dureno | Phytelephas tenuicaulis | Stem Construction Houses                                  |
| Dureno | Prestoea schultzeana    | Entire leaf Construction Thatch                           |
| Dureno | Prestoea schultzeana    | Seed Human food Food                                      |
| Dureno | Prestoea schultzeana    | Seed Utensils & tools Hunting and fishing                 |
| Dureno | Socratea exorrhiza      | Root Utensils & tools Domestic utensils                   |
| Dureno | Socratea exorrhiza      | Seed Cultural Personal adornment                          |
| Dureno | Socratea exorrhiza      | Stem Construction Houses                                  |
| Dureno | Socratea exorrhiza      | Stem Construction Thatch                                  |
| Dureno | Socratea exorrhiza      | Stem Utensils & tools Hunting and fishing                 |
| Dureno | Syagrus sancona         | Fruit Cultural Personal adornment                         |
| Dureno | Syagrus sancona         | Seed Cultural Personal adornment                          |
| Dureno | Syagrus sancona         | Stem Construction Houses                                  |

|            |                           |                                                    |
|------------|---------------------------|----------------------------------------------------|
| Dureno     | Syagrus sancona           | Stem Utensils & tools Hunting and fishing          |
| Dureno     | Wettinia maynensis        | Entire leaf Construction Thatch                    |
| Dureno     | Wettinia maynensis        | Seed Cultural Personal adornment                   |
| Dureno     | Wettinia maynensis        | Stem Construction Houses                           |
| Dureno     | Wettinia maynensis        | Stem Utensils & tools Hunting and fishing          |
| Cusu Chico | Astrocaryum chambira      | Fruit Human food Food                              |
| Cusu Chico | Astrocaryum chambira      | Leaf rachis Utensils & tools Domestic utensils     |
| Cusu Chico | Astrocaryum chambira      | Palm heart Human food Food                         |
| Cusu Chico | Astrocaryum chambira      | Petiole Utensils & tools Hunting and fishing       |
| Cusu Chico | Astrocaryum chambira      | Seed Human food Food                               |
| Cusu Chico | Astrocaryum chambira      | Spear leaf Cultural Clothes and accessories        |
| Cusu Chico | Astrocaryum chambira      | Spear leaf Utensils & tools Rope                   |
| Cusu Chico | Astrocaryum chambira      | Stem Construction Houses                           |
| Cusu Chico | Astrocaryum chambira      | Stem Other Miscellaneous                           |
| Cusu Chico | Bactris brongniartii      | Fruit Human food Food                              |
| Cusu Chico | Bactris brongniartii      | Spear leaf Medicinal & veterinary Sensory system   |
| Cusu Chico | Bactris brongniartii      | Stem Construction Houses                           |
| Cusu Chico | Bactris brongniartii      | Stem Utensils & tools Hunting and fishing          |
| Cusu Chico | Desmoncus polyacanthos    | Stem Construction Houses                           |
| Cusu Chico | Desmoncus polyacanthos    | Stem Utensils & tools Rope                         |
| Cusu Chico | Euterpe precatoria        | Fruit Human food Food                              |
| Cusu Chico | Euterpe precatoria        | Palm heart Human food Food                         |
| Cusu Chico | Euterpe precatoria        | Stem Construction Houses                           |
| Cusu Chico | Geonoma macrostachys      | Entire leaf Construction Thatch                    |
| Cusu Chico | Hyospathe elegans         | Entire leaf Construction Thatch                    |
| Cusu Chico | Iriartea deltoidea        | Entire leaf Construction Thatch                    |
| Cusu Chico | Iriartea deltoidea        | Palm heart Human food Food                         |
| Cusu Chico | Iriartea deltoidea        | Stem Construction Houses                           |
| Cusu Chico | Iriartea deltoidea        | Stem Other Miscellaneous                           |
| Cusu Chico | Iriartea deltoidea        | Stem Utensils & tools Hunting and fishing          |
| Cusu Chico | Iriartea deltoidea        | Stem Utensils & tools Labour tools                 |
| Cusu Chico | Mauritia flexuosa         | Entire leaf Construction Thatch                    |
| Cusu Chico | Mauritia flexuosa         | Fruit Human food Beverages                         |
| Cusu Chico | Mauritia flexuosa         | Fruit Human food Food                              |
| Cusu Chico | Mauritia flexuosa         | Leaf rachis Utensils & tools Hunting and fishing   |
| Cusu Chico | Mauritia flexuosa         | Palm heart Human food Food                         |
| Cusu Chico | Mauritia flexuosa         | Petiole Construction Houses                        |
| Cusu Chico | Mauritia flexuosa         | Stem Construction Houses                           |
| Cusu Chico | Mauritia flexuosa         | Stem Other Miscellaneous                           |
| Cusu Chico | Oenocarpus bataua         | Entire leaf Construction Thatch                    |
| Cusu Chico | Oenocarpus bataua         | Fruit Human food Beverages                         |
| Cusu Chico | Oenocarpus bataua         | Fruit Human food Food                              |
| Cusu Chico | Oenocarpus bataua         | Fruit Human food Oils                              |
| Cusu Chico | Oenocarpus bataua         | Palm heart Human food Food                         |
| Cusu Chico | Oenocarpus bataua         | Petiole Utensils & tools Hunting and fishing       |
| Cusu Chico | Oenocarpus bataua         | Stem Other Miscellaneous                           |
| Cusu Chico | Oenocarpus mapora         | Entire leaf Construction Thatch                    |
| Cusu Chico | Oenocarpus mapora         | Fruit Human food Food                              |
| Cusu Chico | Oenocarpus mapora         | Palm heart Human food Food                         |
| Cusu Chico | Oenocarpus mapora         | Stem Construction Houses                           |
| Cusu Chico | Oenocarpus mapora         | Stem Other Miscellaneous                           |
| Cusu Chico | Pholidostachys synanthera | Entire leaf Construction Thatch                    |
| Cusu Chico | Socratea exorrhiza        | Entire leaf Construction Thatch                    |
| Cusu Chico | Socratea exorrhiza        | Palm heart Human food Food                         |
| Cusu Chico | Socratea exorrhiza        | Root Utensils & tools Domestic utensils            |
| Cusu Chico | Socratea exorrhiza        | Spear leaf Medicinal & veterinary Digestive system |
| Cusu Chico | Socratea exorrhiza        | Spear leaf Utensils & tools Domestic utensils      |
| Cusu Chico | Socratea exorrhiza        | Stem Construction Houses                           |
| Cusu Chico | Socratea exorrhiza        | Stem Other Miscellaneous                           |
| Cusu Chico | Socratea salazarii        | Entire leaf Construction Thatch                    |
| Cusu Chico | Socratea salazarii        | Fruit Human food Food                              |
| Cusu Chico | Socratea salazarii        | Stem Construction Houses                           |
| Cusu Chico | Socratea salazarii        | Stem Other Miscellaneous                           |
| Cusu Chico | Socratea salazarii        | Stem Utensils & tools Labour tools                 |
| Cusu Chico | Wettinia maynensis        | Entire leaf Construction Thatch                    |
| Cusu Chico | Wettinia maynensis        | Fruit Human food Food                              |
| Cusu Chico | Wettinia maynensis        | Palm heart Human food Food                         |
| Cusu Chico | Wettinia maynensis        | Seed Human food Food                               |
| Cusu Chico | Wettinia maynensis        | Stem Construction Houses                           |
| Cusu Chico | Wettinia maynensis        | Stem Other Miscellaneous                           |
| Cusu Chico | Wettinia maynensis        | Stem Utensils & tools Labour tools                 |
| Curare     | Astrocaryum chambira      | Entire leaf Construction Thatch                    |
| Curare     | Astrocaryum chambira      | Entire leaf Utensils & tools Labour tools          |
| Curare     | Astrocaryum chambira      | Fruit Animal food Fish bait                        |
| Curare     | Astrocaryum chambira      | Fruit Cultural Personal adornment                  |
| Curare     | Astrocaryum chambira      | Fruit Cultural Recreational                        |
| Curare     | Astrocaryum chambira      | Fruit Cultural Ritual                              |
| Curare     | Astrocaryum chambira      | Fruit Human food Food                              |
| Curare     | Astrocaryum chambira      | Fruit Human food Oils                              |
| Curare     | Astrocaryum chambira      | Palm heart Human food Food                         |
| Curare     | Astrocaryum chambira      | Palm heart Other Miscellaneous                     |
| Curare     | Astrocaryum chambira      | Seed Human food Beverages                          |
| Curare     | Astrocaryum chambira      | Seed Human food Food                               |
| Curare     | Astrocaryum chambira      | Spear leaf Cultural Personal adornment             |
| Curare     | Astrocaryum chambira      | Spear leaf Cultural Ritual                         |
| Curare     | Astrocaryum chambira      | Spear leaf Utensils & tools Domestic utensils      |
| Curare     | Astrocaryum chambira      | Spear leaf Utensils & tools Hunting and fishing    |



|        |                        |                                                                             |
|--------|------------------------|-----------------------------------------------------------------------------|
| Curare | Astrocaryum chambira   | Spear leaf Utensils & tools Rope                                            |
| Curare | Astrocaryum chambira   | Spines Medicinal & veterinary Skin and subcutaneous tissue                  |
| Curare | Astrocaryum chambira   | Stem Other Miscellaneous                                                    |
| Curare | Astrocaryum ciliatum   | Seed Human food Food                                                        |
| Curare | Astrocaryum ciliatum   | Spines Medicinal & veterinary Skin and subcutaneous tissue                  |
| Curare | Astrocaryum ciliatum   | Stem Utensils & tools Domestic utensils                                     |
| Curare | Astrocaryum jauari     | Fruit Animal food Fish bait                                                 |
| Curare | Astrocaryum jauari     | Fruit Animal food Fodder                                                    |
| Curare | Astrocaryum jauari     | Fruit Human food Food                                                       |
| Curare | Astrocaryum jauari     | Seed Human food Food                                                        |
| Curare | Astrocaryum jauari     | Spines Medicinal & veterinary Skin and subcutaneous tissue                  |
| Curare | Astrocaryum jauari     | Stem Construction Houses                                                    |
| Curare | Attalea insignis       | Bract Utensils & tools Domestic utensils                                    |
| Curare | Attalea insignis       | Entire leaf Utensils & tools Hunting and fishing                            |
| Curare | Attalea insignis       | Fruit Human food Food                                                       |
| Curare | Attalea maripa         | Entire leaf Construction Thatch                                             |
| Curare | Attalea maripa         | Entire plant Cultural Recreational                                          |
| Curare | Attalea maripa         | Entire plant Human food Food additives                                      |
| Curare | Attalea maripa         | Fruit Cultural Cosmetic                                                     |
| Curare | Attalea maripa         | Fruit Human food Beverages                                                  |
| Curare | Attalea maripa         | Fruit Human food Food                                                       |
| Curare | Attalea maripa         | Infrutescence Cultural Recreational                                         |
| Curare | Attalea maripa         | Palm heart Human food Food                                                  |
| Curare | Attalea maripa         | Palm heart Other Miscellaneous                                              |
| Curare | Attalea maripa         | Petiole Utensils & tools Domestic utensils                                  |
| Curare | Attalea maripa         | Petiole Utensils & tools Hunting and fishing                                |
| Curare | Attalea maripa         | Petiole Utensils & tools Labour tools                                       |
| Curare | Attalea maripa         | Seed Other Miscellaneous                                                    |
| Curare | Attalea maripa         | Spear leaf Cultural Recreational                                            |
| Curare | Attalea maripa         | Stem Cultural Recreational                                                  |
| Curare | Attalea maripa         | Stem Human food Food additives                                              |
| Curare | Attalea maripa         | Stem Other Miscellaneous                                                    |
| Curare | Attalea microcarpa     | Entire leaf Construction Houses                                             |
| Curare | Attalea microcarpa     | Entire leaf Construction Thatch                                             |
| Curare | Attalea microcarpa     | Fruit Human food Food                                                       |
| Curare | Attalea microcarpa     | Petiole Utensils & tools Hunting and fishing                                |
| Curare | Attalea microcarpa     | Seed Human food Food                                                        |
| Curare | Attalea microcarpa     | Spear leaf Cultural Personal adornment                                      |
| Curare | Attalea microcarpa     | Spear leaf Cultural Ritual                                                  |
| Curare | Attalea microcarpa     | Spear leaf Utensils & tools Domestic utensils                               |
| Curare | Attalea peruviana      | Entire leaf Construction Thatch                                             |
| Curare | Attalea peruviana      | Fruit Human food Beverages                                                  |
| Curare | Attalea peruviana      | Fruit Human food Food                                                       |
| Curare | Attalea peruviana      | Fruit Human food Oils                                                       |
| Curare | Attalea peruviana      | Fruit Utensils & tools Labour tools                                         |
| Curare | Attalea peruviana      | Petiole Utensils & tools Hunting and fishing                                |
| Curare | Attalea peruviana      | Seed Human food Food                                                        |
| Curare | Attalea peruviana      | Seed Other Miscellaneous                                                    |
| Curare | Attalea peruviana      | Spear leaf Cultural Personal adornment                                      |
| Curare | Attalea peruviana      | Spear leaf Cultural Ritual                                                  |
| Curare | Attalea peruviana      | Spear leaf Utensils & tools Domestic utensils                               |
| Curare | Attalea plowmanii      | Spear leaf Utensils & tools Domestic utensils                               |
| Curare | Attalea septuagenata   | Fruit Human food Food                                                       |
| Curare | Attalea septuagenata   | Petiole Utensils & tools Domestic utensils                                  |
| Curare | Attalea septuagenata   | Petiole Utensils & tools Hunting and fishing                                |
| Curare | Bactris acanthocarpa   | Petiole Utensils & tools Labour tools                                       |
| Curare | Bactris acanthocarpa   | Spines Medicinal & veterinary Skin and subcutaneous tissue                  |
| Curare | Bactris bidentula      | Fruit Animal food Fish bait                                                 |
| Curare | Bactris bidentula      | Spines Medicinal & veterinary Skin and subcutaneous tissue                  |
| Curare | Bactris concinna       | Fruit Human food Food                                                       |
| Curare | Bactris concinna       | Spines Medicinal & veterinary Skin and subcutaneous tissue                  |
| Curare | Bactris corossilla     | Seed Human food Food                                                        |
| Curare | Bactris killipii       | Entire leaf Cultural Cosmetic                                               |
| Curare | Bactris riparia        | Fruit Animal food Fish bait                                                 |
| Curare | Bactris riparia        | Spines Medicinal & veterinary Skin and subcutaneous tissue                  |
| Curare | Bactris simplicifrons  | Fruit Utensils & tools Hunting and fishing                                  |
| Curare | Chamaedorea pauciflora | Entire leaf Construction Thatch                                             |
| Curare | Desmoncus polyacanthos | Seed Utensils & tools Other                                                 |
| Curare | Desmoncus polyacanthos | Stem Utensils & tools Domestic utensils                                     |
| Curare | Desmoncus polyacanthos | Stem Utensils & tools Rope                                                  |
| Curare | Euterpe catinga        | Fruit Human food Beverages                                                  |
| Curare | Euterpe catinga        | Fruit Human food Food                                                       |
| Curare | Euterpe catinga        | Palm heart Human food Food                                                  |
| Curare | Euterpe catinga        | Seed Cultural Recreational                                                  |
| Curare | Euterpe catinga        | Stem Construction Houses                                                    |
| Curare | Euterpe precatoria     | Entire leaf Construction Thatch                                             |
| Curare | Euterpe precatoria     | Entire leaf Utensils & tools Domestic utensils                              |
| Curare | Euterpe precatoria     | Fruit Animal food Fish bait                                                 |
| Curare | Euterpe precatoria     | Fruit Human food Beverages                                                  |
| Curare | Euterpe precatoria     | Fruit Human food Food                                                       |
| Curare | Euterpe precatoria     | Fruit Human food Oils                                                       |
| Curare | Euterpe precatoria     | Palm heart Human food Food                                                  |
| Curare | Euterpe precatoria     | Palm heart Medicinal & veterinary General Ailments with Unspecific Symptoms |
| Curare | Euterpe precatoria     | Root Medicinal & veterinary Digestive system                                |
| Curare | Euterpe precatoria     | Root Medicinal & veterinary General Ailments with Unspecific Symptoms       |
| Curare | Euterpe precatoria     | Root Medicinal & veterinary Metabolic system and nutrition                  |
| Curare | Euterpe precatoria     | Root Medicinal & veterinary Not specified at all                            |

|        |                         |                                                      |
|--------|-------------------------|------------------------------------------------------|
| Curare | Euterpe precatoria      | Root Medicinal & veterinary Poisonings               |
| Curare | Euterpe precatoria      | Root Medicinal & veterinary Respiratory system       |
| Curare | Euterpe precatoria      | Seed Utensils & tools Other                          |
| Curare | Euterpe precatoria      | Spear leaf Utensils & tools Hunting and fishing      |
| Curare | Euterpe precatoria      | Stem Construction Houses                             |
| Curare | Iriartea deltoidea      | Entire leaf Construction Thatch                      |
| Curare | Iriartea deltoidea      | Fruit Animal food Fish bait                          |
| Curare | Iriartea deltoidea      | Inflorescence Cultural Recreational                  |
| Curare | Iriartea deltoidea      | Root Cultural Ritual                                 |
| Curare | Iriartea deltoidea      | Stem Construction Houses                             |
| Curare | Iriartea deltoidea      | Stem Construction Other                              |
| Curare | Iriartea deltoidea      | Stem Construction Thatch                             |
| Curare | Iriartea deltoidea      | Stem Construction Transportation                     |
| Curare | Iriartea deltoidea      | Stem Cultural Ritual                                 |
| Curare | Iriartea deltoidea      | Stem Other Miscellaneous                             |
| Curare | Iriartea deltoidea      | Stem Utensils & tools Domestic utensils              |
| Curare | Iriartea deltoidea      | Stem Utensils & tools Hunting and fishing            |
| Curare | Iriartella setigera     | Fruit Human food Food                                |
| Curare | Iriartella setigera     | Stem Construction Houses                             |
| Curare | Iriartella setigera     | Stem Construction Thatch                             |
| Curare | Iriartella setigera     | Stem Utensils & tools Hunting and fishing            |
| Curare | Iriartella setigera     | Stem Utensils & tools Labour tools                   |
| Curare | Lepidocaryum tenue      | Entire leaf Construction Thatch                      |
| Curare | Lepidocaryum tenue      | Palm heart Medicinal & veterinary Respiratory system |
| Curare | Lepidocaryum tenue      | Spear leaf Utensils & tools Hunting and fishing      |
| Curare | Manicaria saccifera     | Bract Cultural Clothes and accessories               |
| Curare | Manicaria saccifera     | Entire leaf Construction Thatch                      |
| Curare | Manicaria saccifera     | Seed Human food Food                                 |
| Curare | Mauritia carana         | Entire leaf Construction Thatch                      |
| Curare | Mauritia carana         | Fruit Human food Food                                |
| Curare | Mauritia carana         | Stem Construction Houses                             |
| Curare | Mauritia flexuosa       | Entire leaf Construction Thatch                      |
| Curare | Mauritia flexuosa       | Fruit Animal food Fish bait                          |
| Curare | Mauritia flexuosa       | Fruit Cultural Cosmetic                              |
| Curare | Mauritia flexuosa       | Fruit Human food Beverages                           |
| Curare | Mauritia flexuosa       | Fruit Human food Food                                |
| Curare | Mauritia flexuosa       | Fruit Human food Oils                                |
| Curare | Mauritia flexuosa       | Petiole Construction Transportation                  |
| Curare | Mauritia flexuosa       | Petiole Utensils & tools Hunting and fishing         |
| Curare | Mauritia flexuosa       | Stem Construction Houses                             |
| Curare | Mauritia flexuosa       | Stem Other Miscellaneous                             |
| Curare | Mauritiella armata      | Entire leaf Construction Thatch                      |
| Curare | Mauritiella armata      | Fruit Animal food Fish bait                          |
| Curare | Mauritiella armata      | Fruit Human food Food                                |
| Curare | Mauritiella armata      | Stem Construction Houses                             |
| Curare | Mauritiella armata      | Stem Construction Thatch                             |
| Curare | Oenocarpus bacaba       | Entire leaf Construction Thatch                      |
| Curare | Oenocarpus bacaba       | Entire leaf Utensils & tools Domestic utensils       |
| Curare | Oenocarpus bacaba       | Fruit Animal food Fish bait                          |
| Curare | Oenocarpus bacaba       | Fruit Human food Beverages                           |
| Curare | Oenocarpus bacaba       | Fruit Human food Food                                |
| Curare | Oenocarpus bacaba       | Fruit Human food Oils                                |
| Curare | Oenocarpus bacaba       | Leaf sheath Cultural Ritual                          |
| Curare | Oenocarpus bacaba       | Leaf sheath Utensils & tools Hunting and fishing     |
| Curare | Oenocarpus bacaba       | Palm heart Human food Food                           |
| Curare | Oenocarpus bacaba       | Petiole Utensils & tools Hunting and fishing         |
| Curare | Oenocarpus bacaba       | Stem Construction Houses                             |
| Curare | Oenocarpus bacaba       | Stem Construction Thatch                             |
| Curare | Oenocarpus bacaba       | Stem Other Miscellaneous                             |
| Curare | Oenocarpus balickii     | Entire leaf Utensils & tools Domestic utensils       |
| Curare | Oenocarpus balickii     | Fruit Animal food Fish bait                          |
| Curare | Oenocarpus balickii     | Fruit Human food Beverages                           |
| Curare | Oenocarpus balickii     | Fruit Human food Food                                |
| Curare | Oenocarpus balickii     | Palm heart Human food Food                           |
| Curare | Oenocarpus balickii     | Stem Other Miscellaneous                             |
| Curare | Oenocarpus bataua       | Entire leaf Construction Thatch                      |
| Curare | Oenocarpus bataua       | Entire leaf Utensils & tools Domestic utensils       |
| Curare | Oenocarpus bataua       | Fruit Animal food Fish bait                          |
| Curare | Oenocarpus bataua       | Fruit Human food Beverages                           |
| Curare | Oenocarpus bataua       | Fruit Human food Food                                |
| Curare | Oenocarpus bataua       | Fruit Human food Oils                                |
| Curare | Oenocarpus bataua       | Fruit Medicinal & veterinary Musculo-skeletal system |
| Curare | Oenocarpus bataua       | Leaf sheath Cultural Ritual                          |
| Curare | Oenocarpus bataua       | Leaf sheath Fuel Fire starter                        |
| Curare | Oenocarpus bataua       | Leaf sheath Utensils & tools Hunting and fishing     |
| Curare | Oenocarpus bataua       | Palm heart Human food Food                           |
| Curare | Oenocarpus bataua       | Petiole Utensils & tools Hunting and fishing         |
| Curare | Oenocarpus bataua       | Spear leaf Utensils & tools Rope                     |
| Curare | Oenocarpus bataua       | Stem Construction Houses                             |
| Curare | Oenocarpus bataua       | Stem Other Miscellaneous                             |
| Curare | Oenocarpus circumtextus | Entire leaf Construction Thatch                      |
| Curare | Oenocarpus circumtextus | Entire leaf Utensils & tools Domestic utensils       |
| Curare | Oenocarpus circumtextus | Fruit Animal food Fish bait                          |
| Curare | Oenocarpus circumtextus | Fruit Human food Beverages                           |
| Curare | Oenocarpus circumtextus | Fruit Human food Food                                |
| Curare | Oenocarpus mapora       | Entire leaf Construction Thatch                      |
| Curare | Oenocarpus mapora       | Entire leaf Utensils & tools Domestic utensils       |

|           |                           |                                                               |
|-----------|---------------------------|---------------------------------------------------------------|
| Curare    | Oenocarpus mapora         | Fruit Animal food Fish bait                                   |
| Curare    | Oenocarpus mapora         | Fruit Human food Beverages                                    |
| Curare    | Oenocarpus mapora         | Fruit Human food Food                                         |
| Curare    | Oenocarpus mapora         | Palm heart Human food Food                                    |
| Curare    | Oenocarpus mapora         | Petiole Utensils & tools Hunting and fishing                  |
| Curare    | Oenocarpus mapora         | Stem Construction Thatch                                      |
| Curare    | Oenocarpus mapora         | Stem Other Miscellaneous                                      |
| Curare    | Socratea exorrhiza        | Entire leaf Construction Thatch                               |
| Curare    | Socratea exorrhiza        | Palm heart Human food Food                                    |
| Curare    | Socratea exorrhiza        | Root Medicinal & veterinary Musculo-skeletal system           |
| Curare    | Socratea exorrhiza        | Root Medicinal & veterinary Poisonings                        |
| Curare    | Socratea exorrhiza        | Root Medicinal & veterinary Skin and subcutaneous tissue      |
| Curare    | Socratea exorrhiza        | Root Utensils & tools Domestic utensils                       |
| Curare    | Socratea exorrhiza        | Root Utensils & tools Labour tools                            |
| Curare    | Socratea exorrhiza        | Stem Construction Houses                                      |
| Curare    | Socratea exorrhiza        | Stem Construction Thatch                                      |
| Curare    | Socratea exorrhiza        | Stem Medicinal & veterinary Veterinary                        |
| Curare    | Socratea exorrhiza        | Stem Other Miscellaneous                                      |
| Correo    | Aiphanes horrida          | Seed Human food Beverages                                     |
| Correo    | Aiphanes horrida          | Seed Human food Food                                          |
| Correo    | Aiphanes horrida          | Spines Medicinal & veterinary Cultural diseases and disorders |
| Correo    | Aiphanes horrida          | Stem Utensils & tools Labour tools                            |
| Correo    | Astrocaryum gratum        | Fruit Cultural Personal adornment                             |
| Correo    | Astrocaryum gratum        | Fruit Cultural Recreational                                   |
| Correo    | Astrocaryum gratum        | Fruit Human food Food                                         |
| Correo    | Astrocaryum gratum        | Fruit Medicinal & veterinary Blood and Cardio-vascular system |
| Correo    | Ceroxylon parvum          | Spear leaf Cultural Ritual                                    |
| Correo    | Ceroxylon parvum          | Stem Construction Houses                                      |
| Correo    | Chamaedorea pinnatifrons  | Entire leaf Utensils & tools Wrappers                         |
| Correo    | Dictyocaryum lamarckianum | Entire leaf Construction Thatch                               |
| Correo    | Dictyocaryum lamarckianum | Fruit Cultural Recreational                                   |
| Correo    | Dictyocaryum lamarckianum | Leaf sheath Utensils & tools Domestic utensils                |
| Correo    | Dictyocaryum lamarckianum | Palm heart Human food Food                                    |
| Correo    | Dictyocaryum lamarckianum | Stem Construction Houses                                      |
| Correo    | Dictyocaryum lamarckianum | Stem Utensils & tools Domestic utensils                       |
| Correo    | Euterpe precatoria        | Fruit Human food Beverages                                    |
| Correo    | Euterpe precatoria        | Leaf rachis Utensils & tools Hunting and fishing              |
| Correo    | Euterpe precatoria        | Palm heart Human food Food                                    |
| Correo    | Euterpe precatoria        | Stem Construction Houses                                      |
| Correo    | Euterpe precatoria        | Stem Utensils & tools Domestic utensils                       |
| Correo    | Euterpe precatoria        | Stem Utensils & tools Rope                                    |
| Correo    | Geonoma deversa           | Entire leaf Construction Thatch                               |
| Correo    | Geonoma undata            | Entire leaf Construction Thatch                               |
| Correo    | Iriarteia deltoidea       | Entire leaf Construction Thatch                               |
| Correo    | Iriarteia deltoidea       | Palm heart Human food Food                                    |
| Correo    | Iriarteia deltoidea       | Stem Construction Houses                                      |
| Correo    | Iriarteia deltoidea       | Stem Construction Thatch                                      |
| Correo    | Iriarteia deltoidea       | Stem Utensils & tools Rope                                    |
| Correo    | Oenocarpus bataua         | Entire leaf Construction Thatch                               |
| Correo    | Oenocarpus bataua         | Fruit Cultural Cosmetic                                       |
| Correo    | Oenocarpus bataua         | Fruit Human food Beverages                                    |
| Correo    | Oenocarpus bataua         | Fruit Medicinal & veterinary Respiratory system               |
| Correo    | Oenocarpus bataua         | Leaf rachis Utensils & tools Domestic utensils                |
| Correo    | Oenocarpus bataua         | Palm heart Human food Food                                    |
| Correo    | Oenocarpus bataua         | Stem Construction Houses                                      |
| Correo    | Oenocarpus bataua         | Stem Other Miscellaneous                                      |
| Correo    | Socratea exorrhiza        | Root Cultural Recreational                                    |
| Correo    | Socratea exorrhiza        | Stem Construction Houses                                      |
| Correo    | Socratea exorrhiza        | Stem Construction Other                                       |
| Correo    | Socratea exorrhiza        | Stem Utensils & tools Domestic utensils                       |
| Chiguilpe | Astrocaryum standleyanum  | Entire leaf Construction Thatch                               |
| Chiguilpe | Astrocaryum standleyanum  | Fruit Cultural Personal adornment                             |
| Chiguilpe | Astrocaryum standleyanum  | Fruit Cultural Recreational                                   |
| Chiguilpe | Astrocaryum standleyanum  | Fruit Human food Food                                         |
| Chiguilpe | Astrocaryum standleyanum  | Fruit Medicinal & veterinary Respiratory system               |
| Chiguilpe | Astrocaryum standleyanum  | Palm heart Human food Food                                    |
| Chiguilpe | Astrocaryum standleyanum  | Spear leaf Cultural Clothes and accessories                   |
| Chiguilpe | Astrocaryum standleyanum  | Spear leaf Utensils & tools Domestic utensils                 |
| Chiguilpe | Astrocaryum standleyanum  | Stem Construction Houses                                      |
| Chiguilpe | Astrocaryum standleyanum  | Stem Other Miscellaneous                                      |
| Chiguilpe | Astrocaryum standleyanum  | Stem Utensils & tools Hunting and fishing                     |
| Chiguilpe | Attalea colenda           | Entire leaf Construction Thatch                               |
| Chiguilpe | Attalea colenda           | Entire plant Cultural Ritual                                  |
| Chiguilpe | Attalea colenda           | Entire plant Environmental Ornamental                         |
| Chiguilpe | Attalea colenda           | Fruit Animal food Fodder                                      |
| Chiguilpe | Attalea colenda           | Fruit Cultural Personal adornment                             |
| Chiguilpe | Attalea colenda           | Fruit Human food Beverages                                    |
| Chiguilpe | Attalea colenda           | Fruit Human food Oils                                         |
| Chiguilpe | Attalea colenda           | Palm heart Human food Food                                    |
| Chiguilpe | Attalea colenda           | Seed Human food Beverages                                     |
| Chiguilpe | Attalea colenda           | Seed Human food Food                                          |
| Chiguilpe | Attalea colenda           | Spear leaf Cultural Ritual                                    |
| Chiguilpe | Attalea colenda           | Spear leaf Utensils & tools Domestic utensils                 |
| Chiguilpe | Attalea colenda           | Stem Other Miscellaneous                                      |
| Chiguilpe | Dictyocaryum lamarckianum | Entire leaf Construction Thatch                               |
| Chiguilpe | Dictyocaryum lamarckianum | Stem Construction Houses                                      |
| Chiguilpe | Dictyocaryum lamarckianum | Stem Other Miscellaneous                                      |

|           |                              |                                                                 |
|-----------|------------------------------|-----------------------------------------------------------------|
| Chiguilpe | Euterpe oleracea             | Entire leaf Construction Thatch                                 |
| Chiguilpe | Euterpe oleracea             | Fruit Human food Beverages                                      |
| Chiguilpe | Euterpe oleracea             | Palm heart Human food Food                                      |
| Chiguilpe | Geonoma cuneata              | Entire leaf Construction Thatch                                 |
| Chiguilpe | Geonoma cuneata              | Entire plant Environmental Ornamental                           |
| Chiguilpe | Geonoma cuneata              | Petiole Utensils & tools Hunting and fishing                    |
| Chiguilpe | Geonoma cuneata              | Stem Utensils & tools Labour tools                              |
| Chiguilpe | Iriartea deltoidea           | Entire leaf Construction Thatch                                 |
| Chiguilpe | Iriartea deltoidea           | Leaf sheath Cultural Ritual                                     |
| Chiguilpe | Iriartea deltoidea           | Leaf sheath Utensils & tools Domestic utensils                  |
| Chiguilpe | Iriartea deltoidea           | Palm heart Human food Food                                      |
| Chiguilpe | Iriartea deltoidea           | Root Medicinal & veterinary Not specified at all                |
| Chiguilpe | Iriartea deltoidea           | Root Medicinal & veterinary Urinary system                      |
| Chiguilpe | Iriartea deltoidea           | Root Utensils & tools Rope                                      |
| Chiguilpe | Iriartea deltoidea           | Seed Cultural Personal adornment                                |
| Chiguilpe | Iriartea deltoidea           | Stem Construction Houses                                        |
| Chiguilpe | Iriartea deltoidea           | Stem Construction Thatch                                        |
| Chiguilpe | Iriartea deltoidea           | Stem Cultural Personal adornment                                |
| Chiguilpe | Iriartea deltoidea           | Stem Cultural Recreational                                      |
| Chiguilpe | Iriartea deltoidea           | Stem Cultural Ritual                                            |
| Chiguilpe | Iriartea deltoidea           | Stem Environmental Fences                                       |
| Chiguilpe | Iriartea deltoidea           | Stem Fuel Firewood                                              |
| Chiguilpe | Iriartea deltoidea           | Stem Other Miscellaneous                                        |
| Chiguilpe | Iriartea deltoidea           | Stem Utensils & tools Domestic utensils                         |
| Chiguilpe | Iriartea deltoidea           | Stem Utensils & tools Hunting and fishing                       |
| Chiguilpe | Iriartea deltoidea           | Stem Utensils & tools Labour tools                              |
| Chiguilpe | Oenocarpus bataua            | Entire leaf Construction Thatch                                 |
| Chiguilpe | Oenocarpus bataua            | Entire leaf Utensils & tools Domestic utensils                  |
| Chiguilpe | Oenocarpus bataua            | Fruit Human food Beverages                                      |
| Chiguilpe | Oenocarpus bataua            | Fruit Human food Food                                           |
| Chiguilpe | Oenocarpus bataua            | Fruit Human food Oils                                           |
| Chiguilpe | Oenocarpus bataua            | Fruit Medicinal & veterinary Blood and Cardio-vascular system   |
| Chiguilpe | Oenocarpus bataua            | Fruit Medicinal & veterinary Digestive system                   |
| Chiguilpe | Oenocarpus bataua            | Fruit Medicinal & veterinary Reproductive system and sex health |
| Chiguilpe | Oenocarpus bataua            | Leaf sheath Utensils & tools Domestic utensils                  |
| Chiguilpe | Oenocarpus bataua            | Leaf sheath Utensils & tools Hunting and fishing                |
| Chiguilpe | Oenocarpus bataua            | Palm heart Human food Food                                      |
| Chiguilpe | Oenocarpus bataua            | Stem Construction Houses                                        |
| Chiguilpe | Oenocarpus bataua            | Stem Other Miscellaneous                                        |
| Chiguilpe | Oenocarpus mapora            | Fruit Human food Beverages                                      |
| Chiguilpe | Oenocarpus mapora            | Palm heart Human food Food                                      |
| Chiguilpe | Oenocarpus mapora            | Petiole Utensils & tools Domestic utensils                      |
| Chiguilpe | Oenocarpus mapora            | Stem Construction Houses                                        |
| Chiguilpe | Oenocarpus mapora            | Stem Other Miscellaneous                                        |
| Chiguilpe | Phytelphas aequatorialis     | Entire leaf Construction Thatch                                 |
| Chiguilpe | Phytelphas aequatorialis     | Entire leaf Environmental Ornamental                            |
| Chiguilpe | Phytelphas aequatorialis     | Palm heart Human food Food                                      |
| Chiguilpe | Phytelphas aequatorialis     | Petiole Utensils & tools Labour tools                           |
| Chiguilpe | Phytelphas aequatorialis     | Seed Cultural Clothes and accessories                           |
| Chiguilpe | Phytelphas aequatorialis     | Seed Cultural Personal adornment                                |
| Chiguilpe | Phytelphas aequatorialis     | Seed Human food Beverages                                       |
| Chiguilpe | Phytelphas aequatorialis     | Seed Human food Food                                            |
| Chiguilpe | Phytelphas aequatorialis     | Seed Medicinal & veterinary Urinary system                      |
| Chiguilpe | Phytelphas aequatorialis     | Seed Utensils & tools Hunting and fishing                       |
| Chiguilpe | Phytelphas aequatorialis     | Stem Construction Houses                                        |
| Chiguilpe | Phytelphas aequatorialis     | Stem Other Miscellaneous                                        |
| Chiguilpe | Socratea exorrhiza           | Entire leaf Construction Thatch                                 |
| Chiguilpe | Socratea exorrhiza           | Palm heart Human food Food                                      |
| Chiguilpe | Socratea exorrhiza           | Root Utensils & tools Domestic utensils                         |
| Chiguilpe | Socratea exorrhiza           | Seed Cultural Personal adornment                                |
| Chiguilpe | Socratea exorrhiza           | Seed Human food Food                                            |
| Chiguilpe | Socratea exorrhiza           | Stem Construction Houses                                        |
| Chiguilpe | Socratea exorrhiza           | Stem Construction Thatch                                        |
| Chiguilpe | Socratea exorrhiza           | Stem Other Miscellaneous                                        |
| Chiguilpe | Socratea exorrhiza           | Stem Utensils & tools Domestic utensils                         |
| Chiguilpe | Socratea exorrhiza           | Stem Utensils & tools Hunting and fishing                       |
| Chiguilpe | Synechanthus warscewiczianus | Entire leaf Cultural Dyes                                       |
| Chiguilpe | Synechanthus warscewiczianus | Fruit Cultural Dyes                                             |
| Chiguilpe | Synechanthus warscewiczianus | Petiole Utensils & tools Hunting and fishing                    |
| Chiguilpe | Synechanthus warscewiczianus | Stem Construction Houses                                        |
| Chiguilpe | Wettinia aequalis            | Entire leaf Construction Thatch                                 |
| Chiguilpe | Wettinia aequalis            | Fruit Medicinal & veterinary Blood and Cardio-vascular system   |
| Chiguilpe | Wettinia aequalis            | Fruit Medicinal & veterinary Dental health                      |
| Chiguilpe | Wettinia aequalis            | Palm heart Human food Food                                      |
| Chiguilpe | Wettinia aequalis            | Seed Cultural Personal adornment                                |
| Chiguilpe | Wettinia aequalis            | Seed Human food Food                                            |
| Chiguilpe | Wettinia aequalis            | Stem Construction Houses                                        |
| Chiguilpe | Wettinia aequalis            | Stem Cultural Personal adornment                                |
| Chiguilpe | Wettinia aequalis            | Stem Other Miscellaneous                                        |
| Chiguilpe | Wettinia aequalis            | Stem Utensils & tools Hunting and fishing                       |
| Chiguilpe | Wettinia aequalis            | Stem Utensils & tools Labour tools                              |
| Chiguilpe | Wettinia quinaria            | Entire leaf Construction Thatch                                 |
| Chiguilpe | Wettinia quinaria            | Seed Cultural Personal adornment                                |
| Chiguilpe | Wettinia quinaria            | Seed Human food Food                                            |
| Chiguilpe | Wettinia quinaria            | Stem Construction Houses                                        |
| Chiguilpe | Wettinia quinaria            | Stem Construction Other                                         |
| Chiguilpe | Wettinia quinaria            | Stem Construction Thatch                                        |

|                    |                      |                                                              |
|--------------------|----------------------|--------------------------------------------------------------|
| Chiguilpe          | Wettinia quinaria    | Stem Cultural Personal adornment                             |
| Chiguilpe          | Wettinia quinaria    | Stem Other Miscellaneous                                     |
| Chiguilpe          | Wettinia quinaria    | Stem Utensils & tools Hunting and fishing                    |
| Chiguilpe          | Wettinia quinaria    | Stem Utensils & tools Labour tools                           |
| Centro Providencia | Astrocaryum chambira | Bract Cultural Recreational                                  |
| Centro Providencia | Astrocaryum chambira | Entire leaf Utensils & tools Domestic utensils               |
| Centro Providencia | Astrocaryum chambira | Entire leaf Utensils & tools Hunting and fishing             |
| Centro Providencia | Astrocaryum chambira | Entire leaf Utensils & tools Labour tools                    |
| Centro Providencia | Astrocaryum chambira | Entire leaf Utensils & tools Rope                            |
| Centro Providencia | Astrocaryum chambira | Entire plant Fuel Firewood                                   |
| Centro Providencia | Astrocaryum chambira | Fruit Cultural Personal adornment                            |
| Centro Providencia | Astrocaryum chambira | Fruit Cultural Recreational                                  |
| Centro Providencia | Astrocaryum chambira | Fruit Cultural Ritual                                        |
| Centro Providencia | Astrocaryum chambira | Fruit Human food Beverages                                   |
| Centro Providencia | Astrocaryum chambira | Fruit Human food Food                                        |
| Centro Providencia | Astrocaryum chambira | Leaf rachis Utensils & tools Domestic utensils               |
| Centro Providencia | Astrocaryum chambira | Palm heart Other Miscellaneous                               |
| Centro Providencia | Astrocaryum chambira | Petiole Utensils & tools Domestic utensils                   |
| Centro Providencia | Astrocaryum chambira | Petiole Utensils & tools Hunting and fishing                 |
| Centro Providencia | Astrocaryum chambira | Petiole Utensils & tools Rope                                |
| Centro Providencia | Astrocaryum chambira | Seed Human food Beverages                                    |
| Centro Providencia | Astrocaryum chambira | Seed Human food Food                                         |
| Centro Providencia | Astrocaryum chambira | Spear leaf Cultural Clothes and accessories                  |
| Centro Providencia | Astrocaryum chambira | Spear leaf Cultural Personal adornment                       |
| Centro Providencia | Astrocaryum chambira | Spear leaf Cultural Ritual                                   |
| Centro Providencia | Astrocaryum chambira | Spear leaf Utensils & tools Domestic utensils                |
| Centro Providencia | Astrocaryum chambira | Spear leaf Utensils & tools Hunting and fishing              |
| Centro Providencia | Astrocaryum chambira | Spear leaf Utensils & tools Labour tools                     |
| Centro Providencia | Astrocaryum chambira | Spear leaf Utensils & tools Rope                             |
| Centro Providencia | Astrocaryum chambira | Spines Medicinal & veterinary Skin and subcutaneous tissue   |
| Centro Providencia | Astrocaryum chambira | Spines Utensils & tools Hunting and fishing                  |
| Centro Providencia | Astrocaryum chambira | Stem Other Miscellaneous                                     |
| Centro Providencia | Astrocaryum ciliatum | Entire leaf Utensils & tools Domestic utensils               |
| Centro Providencia | Astrocaryum ciliatum | Entire leaf Utensils & tools Hunting and fishing             |
| Centro Providencia | Astrocaryum ciliatum | Fruit Cultural Personal adornment                            |
| Centro Providencia | Astrocaryum ciliatum | Fruit Cultural Recreational                                  |
| Centro Providencia | Astrocaryum ciliatum | Fruit Cultural Ritual                                        |
| Centro Providencia | Astrocaryum ciliatum | Fruit Human food Food                                        |
| Centro Providencia | Astrocaryum ciliatum | Seed Human food Beverages                                    |
| Centro Providencia | Astrocaryum ciliatum | Seed Human food Food                                         |
| Centro Providencia | Astrocaryum ciliatum | Stem Construction Houses                                     |
| Centro Providencia | Astrocaryum jauari   | Fruit Animal food Fish bait                                  |
| Centro Providencia | Astrocaryum jauari   | Fruit Cultural Personal adornment                            |
| Centro Providencia | Astrocaryum jauari   | Fruit Human food Food                                        |
| Centro Providencia | Astrocaryum jauari   | Palm heart Animal food Fish bait                             |
| Centro Providencia | Astrocaryum jauari   | Palm heart Human food Food                                   |
| Centro Providencia | Astrocaryum jauari   | Seed Human food Food                                         |
| Centro Providencia | Astrocaryum jauari   | Spines Medicinal & veterinary Skin and subcutaneous tissue   |
| Centro Providencia | Astrocaryum jauari   | Stem Construction Houses                                     |
| Centro Providencia | Astrocaryum jauari   | Stem Fuel Firewood                                           |
| Centro Providencia | Astrocaryum jauari   | Stem Utensils & tools Domestic utensils                      |
| Centro Providencia | Attalea insignis     | Bract Cultural Recreational                                  |
| Centro Providencia | Attalea insignis     | Entire leaf Construction Thatch                              |
| Centro Providencia | Attalea insignis     | Entire leaf Fuel Other                                       |
| Centro Providencia | Attalea insignis     | Entire leaf Utensils & tools Hunting and fishing             |
| Centro Providencia | Attalea insignis     | Fruit Human food Food                                        |
| Centro Providencia | Attalea insignis     | Petiole Utensils & tools Hunting and fishing                 |
| Centro Providencia | Attalea insignis     | Seed Human food Food                                         |
| Centro Providencia | Attalea insignis     | Spear leaf Construction Thatch                               |
| Centro Providencia | Attalea insignis     | Spear leaf Cultural Recreational                             |
| Centro Providencia | Attalea insignis     | Spear leaf Cultural Ritual                                   |
| Centro Providencia | Attalea insignis     | Spear leaf Utensils & tools Domestic utensils                |
| Centro Providencia | Attalea maripa       | Entire leaf Construction Thatch                              |
| Centro Providencia | Attalea maripa       | Entire leaf Utensils & tools Hunting and fishing             |
| Centro Providencia | Attalea maripa       | Entire plant Cultural Recreational                           |
| Centro Providencia | Attalea maripa       | Entire plant Human food Food additives                       |
| Centro Providencia | Attalea maripa       | Fruit Cultural Personal adornment                            |
| Centro Providencia | Attalea maripa       | Fruit Human food Beverages                                   |
| Centro Providencia | Attalea maripa       | Fruit Human food Food                                        |
| Centro Providencia | Attalea maripa       | Fruit Medicinal & veterinary Pregnancy, birth and puerperial |
| Centro Providencia | Attalea maripa       | Fruit Utensils & tools Hunting and fishing                   |
| Centro Providencia | Attalea maripa       | Leaf rachis Utensils & tools Hunting and fishing             |
| Centro Providencia | Attalea maripa       | Palm heart Human food Food                                   |
| Centro Providencia | Attalea maripa       | Palm heart Other Miscellaneous                               |
| Centro Providencia | Attalea maripa       | Petiole Cultural Recreational                                |
| Centro Providencia | Attalea maripa       | Petiole Utensils & tools Domestic utensils                   |
| Centro Providencia | Attalea maripa       | Petiole Utensils & tools Hunting and fishing                 |
| Centro Providencia | Attalea maripa       | Petiole Utensils & tools Labour tools                        |
| Centro Providencia | Attalea maripa       | Seed Human food Food                                         |
| Centro Providencia | Attalea maripa       | Spear leaf Construction Houses                               |
| Centro Providencia | Attalea maripa       | Spear leaf Construction Thatch                               |
| Centro Providencia | Attalea maripa       | Spear leaf Cultural Ritual                                   |
| Centro Providencia | Attalea maripa       | Spear leaf Utensils & tools Domestic utensils                |
| Centro Providencia | Attalea maripa       | Spear leaf Utensils & tools Hunting and fishing              |
| Centro Providencia | Attalea maripa       | Stem Cultural Ritual                                         |
| Centro Providencia | Attalea maripa       | Stem Other Miscellaneous                                     |
| Centro Providencia | Attalea microcarpa   | Bract Utensils & tools Domestic utensils                     |

|                    |                        |                                                            |
|--------------------|------------------------|------------------------------------------------------------|
| Centro Providencia | Attalea microcarpa     | Entire leaf Construction Houses                            |
| Centro Providencia | Attalea microcarpa     | Entire leaf Construction Thatch                            |
| Centro Providencia | Attalea microcarpa     | Entire leaf Utensils & tools Hunting and fishing           |
| Centro Providencia | Attalea microcarpa     | Fruit Cultural Personal adornment                          |
| Centro Providencia | Attalea microcarpa     | Fruit Human food Food                                      |
| Centro Providencia | Attalea microcarpa     | Leaf rachis Utensils & tools Domestic utensils             |
| Centro Providencia | Attalea microcarpa     | Leaf rachis Utensils & tools Hunting and fishing           |
| Centro Providencia | Attalea microcarpa     | Petiole Construction Thatch                                |
| Centro Providencia | Attalea microcarpa     | Petiole Utensils & tools Domestic utensils                 |
| Centro Providencia | Attalea microcarpa     | Petiole Utensils & tools Hunting and fishing               |
| Centro Providencia | Attalea microcarpa     | Seed Human food Food                                       |
| Centro Providencia | Attalea microcarpa     | Spear leaf Construction Houses                             |
| Centro Providencia | Attalea microcarpa     | Spear leaf Construction Thatch                             |
| Centro Providencia | Attalea microcarpa     | Spear leaf Utensils & tools Domestic utensils              |
| Centro Providencia | Attalea septuagenata   | Entire leaf Construction Thatch                            |
| Centro Providencia | Attalea septuagenata   | Fruit Human food Food                                      |
| Centro Providencia | Attalea septuagenata   | Petiole Utensils & tools Domestic utensils                 |
| Centro Providencia | Attalea septuagenata   | Petiole Utensils & tools Hunting and fishing               |
| Centro Providencia | Attalea septuagenata   | Petiole Utensils & tools Labour tools                      |
| Centro Providencia | Attalea septuagenata   | Spear leaf Construction Thatch                             |
| Centro Providencia | Attalea septuagenata   | Spear leaf Utensils & tools Domestic utensils              |
| Centro Providencia | Attalea septuagenata   | Stem Construction Houses                                   |
| Centro Providencia | Bactris acanthocarpa   | Entire leaf Utensils & tools Labour tools                  |
| Centro Providencia | Bactris acanthocarpa   | Fruit Animal food Fish bait                                |
| Centro Providencia | Bactris acanthocarpa   | Fruit Human food Food                                      |
| Centro Providencia | Bactris acanthocarpa   | Leaf rachis Utensils & tools Labour tools                  |
| Centro Providencia | Bactris acanthocarpa   | Palm heart Human food Food                                 |
| Centro Providencia | Bactris acanthocarpa   | Petiole Utensils & tools Labour tools                      |
| Centro Providencia | Bactris acanthocarpa   | Seed Cultural Personal adornment                           |
| Centro Providencia | Bactris acanthocarpa   | Seed Cultural Ritual                                       |
| Centro Providencia | Bactris acanthocarpa   | Seed Human food Food                                       |
| Centro Providencia | Bactris bidentula      | Fruit Animal food Fish bait                                |
| Centro Providencia | Bactris bidentula      | Fruit Human food Food                                      |
| Centro Providencia | Bactris bidentula      | Seed Human food Food                                       |
| Centro Providencia | Bactris concinna       | Fruit Human food Food                                      |
| Centro Providencia | Bactris concinna       | Petiole Utensils & tools Domestic utensils                 |
| Centro Providencia | Bactris concinna       | Seed Human food Food                                       |
| Centro Providencia | Bactris corossilla     | Fruit Human food Food                                      |
| Centro Providencia | Bactris corossilla     | Palm heart Human food Food                                 |
| Centro Providencia | Bactris corossilla     | Petiole Utensils & tools Labour tools                      |
| Centro Providencia | Bactris corossilla     | Seed Human food Food                                       |
| Centro Providencia | Bactris corossilla     | Spines Medicinal & veterinary Skin and subcutaneous tissue |
| Centro Providencia | Bactris corossilla     | Stem Cultural Personal adornment                           |
| Centro Providencia | Bactris corossilla     | Stem Utensils & tools Domestic utensils                    |
| Centro Providencia | Bactris killipii       | Entire leaf Cultural Cosmetic                              |
| Centro Providencia | Bactris killipii       | Fruit Cultural Personal adornment                          |
| Centro Providencia | Bactris killipii       | Petiole Utensils & tools Labour tools                      |
| Centro Providencia | Bactris maraja         | Fruit Human food Food                                      |
| Centro Providencia | Bactris maraja         | Spines Medicinal & veterinary Skin and subcutaneous tissue |
| Centro Providencia | Bactris maraja         | Stem Cultural Personal adornment                           |
| Centro Providencia | Bactris riparia        | Fruit Animal food Fish bait                                |
| Centro Providencia | Bactris riparia        | Spines Medicinal & veterinary Skin and subcutaneous tissue |
| Centro Providencia | Bactris simplicifrons  | Stem Cultural Personal adornment                           |
| Centro Providencia | Bactris simplicifrons  | Stem Utensils & tools Hunting and fishing                  |
| Centro Providencia | Desmoncus giganteus    | Stem Utensils & tools Domestic utensils                    |
| Centro Providencia | Desmoncus giganteus    | Stem Utensils & tools Rope                                 |
| Centro Providencia | Desmoncus mitis        | Spear leaf Utensils & tools Rope                           |
| Centro Providencia | Desmoncus mitis        | Stem Utensils & tools Domestic utensils                    |
| Centro Providencia | Desmoncus mitis        | Stem Utensils & tools Rope                                 |
| Centro Providencia | Desmoncus polyacanthos | Stem Utensils & tools Domestic utensils                    |
| Centro Providencia | Desmoncus polyacanthos | Stem Utensils & tools Rope                                 |
| Centro Providencia | Euterpe catinga        | Entire leaf Construction Thatch                            |
| Centro Providencia | Euterpe catinga        | Entire leaf Utensils & tools Domestic utensils             |
| Centro Providencia | Euterpe catinga        | Fruit Human food Beverages                                 |
| Centro Providencia | Euterpe catinga        | Fruit Human food Food                                      |
| Centro Providencia | Euterpe catinga        | Palm heart Human food Food                                 |
| Centro Providencia | Euterpe catinga        | Stem Construction Houses                                   |
| Centro Providencia | Euterpe precatoria     | Entire leaf Construction Thatch                            |
| Centro Providencia | Euterpe precatoria     | Entire leaf Utensils & tools Domestic utensils             |
| Centro Providencia | Euterpe precatoria     | Entire leaf Utensils & tools Rope                          |
| Centro Providencia | Euterpe precatoria     | Fruit Animal food Fish bait                                |
| Centro Providencia | Euterpe precatoria     | Fruit Cultural Ritual                                      |
| Centro Providencia | Euterpe precatoria     | Fruit Human food Beverages                                 |
| Centro Providencia | Euterpe precatoria     | Fruit Human food Food                                      |
| Centro Providencia | Euterpe precatoria     | Fruit Human food Oils                                      |
| Centro Providencia | Euterpe precatoria     | Palm heart Human food Food                                 |
| Centro Providencia | Euterpe precatoria     | Root Medicinal & veterinary Digestive system               |
| Centro Providencia | Euterpe precatoria     | Root Medicinal & veterinary Infections and infestations    |
| Centro Providencia | Euterpe precatoria     | Root Medicinal & veterinary Not specified at all           |
| Centro Providencia | Euterpe precatoria     | Root Medicinal & veterinary Poisonings                     |
| Centro Providencia | Euterpe precatoria     | Root Medicinal & veterinary Respiratory system             |
| Centro Providencia | Euterpe precatoria     | Root Medicinal & veterinary Urinary system                 |
| Centro Providencia | Euterpe precatoria     | Seed Cultural Personal adornment                           |
| Centro Providencia | Euterpe precatoria     | Spear leaf Utensils & tools Hunting and fishing            |
| Centro Providencia | Euterpe precatoria     | Stem Construction Houses                                   |
| Centro Providencia | Euterpe precatoria     | Stem Construction Thatch                                   |
| Centro Providencia | Euterpe precatoria     | Stem Fuel Firewood                                         |

|                    |                     |                                                  |
|--------------------|---------------------|--------------------------------------------------|
| Centro Providencia | Euterpe precatoria  | Stem Other Miscellaneous                         |
| Centro Providencia | Geonoma deversa     | Entire leaf Construction Thatch                  |
| Centro Providencia | Geonoma deversa     | Entire leaf Utensils & tools Wrappers            |
| Centro Providencia | Geonoma deversa     | Fruit Utensils & tools Hunting and fishing       |
| Centro Providencia | Geonoma deversa     | Stem Utensils & tools Labour tools               |
| Centro Providencia | Geonoma maxima      | Entire leaf Construction Houses                  |
| Centro Providencia | Geonoma maxima      | Entire leaf Construction Thatch                  |
| Centro Providencia | Geonoma maxima      | Fruit Human food Food                            |
| Centro Providencia | Iriartea deltoidea  | Entire leaf Construction Thatch                  |
| Centro Providencia | Iriartea deltoidea  | Entire leaf Utensils & tools Domestic utensils   |
| Centro Providencia | Iriartea deltoidea  | Palm heart Human food Food                       |
| Centro Providencia | Iriartea deltoidea  | Palm heart Other Miscellaneous                   |
| Centro Providencia | Iriartea deltoidea  | Root Cultural Ritual                             |
| Centro Providencia | Iriartea deltoidea  | Root Medicinal & veterinary Poisonings           |
| Centro Providencia | Iriartea deltoidea  | Root Utensils & tools Domestic utensils          |
| Centro Providencia | Iriartea deltoidea  | Stem Construction Houses                         |
| Centro Providencia | Iriartea deltoidea  | Stem Construction Other                          |
| Centro Providencia | Iriartea deltoidea  | Stem Construction Thatch                         |
| Centro Providencia | Iriartea deltoidea  | Stem Construction Transportation                 |
| Centro Providencia | Iriartea deltoidea  | Stem Fuel Firewood                               |
| Centro Providencia | Iriartea deltoidea  | Stem Other Miscellaneous                         |
| Centro Providencia | Iriartea deltoidea  | Stem Utensils & tools Domestic utensils          |
| Centro Providencia | Iriartea deltoidea  | Stem Utensils & tools Hunting and fishing        |
| Centro Providencia | Iriartea deltoidea  | Stem Utensils & tools Labour tools               |
| Centro Providencia | Iriartella setigera | Entire leaf Construction Thatch                  |
| Centro Providencia | Iriartella setigera | Stem Construction Houses                         |
| Centro Providencia | Iriartella setigera | Stem Construction Thatch                         |
| Centro Providencia | Iriartella setigera | Stem Cultural Ritual                             |
| Centro Providencia | Iriartella setigera | Stem Other Miscellaneous                         |
| Centro Providencia | Iriartella setigera | Stem Utensils & tools Domestic utensils          |
| Centro Providencia | Iriartella setigera | Stem Utensils & tools Hunting and fishing        |
| Centro Providencia | Iriartella setigera | Stem Utensils & tools Labour tools               |
| Centro Providencia | Lepidocaryum tenue  | Entire leaf Construction Houses                  |
| Centro Providencia | Lepidocaryum tenue  | Entire leaf Construction Thatch                  |
| Centro Providencia | Lepidocaryum tenue  | Petiole Cultural Ritual                          |
| Centro Providencia | Lepidocaryum tenue  | Spear leaf Utensils & tools Domestic utensils    |
| Centro Providencia | Lepidocaryum tenue  | Spear leaf Utensils & tools Hunting and fishing  |
| Centro Providencia | Manicaria martiana  | Entire leaf Construction Houses                  |
| Centro Providencia | Manicaria martiana  | Entire leaf Construction Thatch                  |
| Centro Providencia | Manicaria martiana  | Entire leaf Utensils & tools Domestic utensils   |
| Centro Providencia | Manicaria martiana  | Petiole Utensils & tools Hunting and fishing     |
| Centro Providencia | Manicaria martiana  | Spear leaf Utensils & tools Domestic utensils    |
| Centro Providencia | Manicaria saccifera | Entire leaf Construction Houses                  |
| Centro Providencia | Manicaria saccifera | Entire leaf Construction Thatch                  |
| Centro Providencia | Manicaria saccifera | Petiole Utensils & tools Domestic utensils       |
| Centro Providencia | Manicaria saccifera | Seed Human food Food                             |
| Centro Providencia | Manicaria saccifera | Spear leaf Cultural Recreational                 |
| Centro Providencia | Mauritia carana     | Entire leaf Construction Thatch                  |
| Centro Providencia | Mauritia carana     | Fruit Human food Beverages                       |
| Centro Providencia | Mauritia carana     | Fruit Human food Food                            |
| Centro Providencia | Mauritia carana     | Leaf sheath Utensils & tools Domestic utensils   |
| Centro Providencia | Mauritia carana     | Leaf sheath Utensils & tools Hunting and fishing |
| Centro Providencia | Mauritia carana     | Petiole Utensils & tools Hunting and fishing     |
| Centro Providencia | Mauritia carana     | Spear leaf Construction Houses                   |
| Centro Providencia | Mauritia carana     | Spear leaf Construction Thatch                   |
| Centro Providencia | Mauritia carana     | Stem Other Miscellaneous                         |
| Centro Providencia | Mauritia carana     | Stem Utensils & tools Domestic utensils          |
| Centro Providencia | Mauritia flexuosa   | Entire leaf Construction Thatch                  |
| Centro Providencia | Mauritia flexuosa   | Entire leaf Utensils & tools Domestic utensils   |
| Centro Providencia | Mauritia flexuosa   | Fruit Animal food Fish bait                      |
| Centro Providencia | Mauritia flexuosa   | Fruit Cultural Ritual                            |
| Centro Providencia | Mauritia flexuosa   | Fruit Human food Beverages                       |
| Centro Providencia | Mauritia flexuosa   | Fruit Human food Food                            |
| Centro Providencia | Mauritia flexuosa   | Fruit Human food Oils                            |
| Centro Providencia | Mauritia flexuosa   | Palm heart Human food Food                       |
| Centro Providencia | Mauritia flexuosa   | Spear leaf Construction Houses                   |
| Centro Providencia | Mauritia flexuosa   | Spear leaf Cultural Ritual                       |
| Centro Providencia | Mauritia flexuosa   | Spear leaf Utensils & tools Domestic utensils    |
| Centro Providencia | Mauritia flexuosa   | Stem Construction Houses                         |
| Centro Providencia | Mauritia flexuosa   | Stem Construction Thatch                         |
| Centro Providencia | Mauritia flexuosa   | Stem Other Miscellaneous                         |
| Centro Providencia | Mauritiella armata  | Entire leaf Construction Thatch                  |
| Centro Providencia | Mauritiella armata  | Entire leaf Utensils & tools Domestic utensils   |
| Centro Providencia | Mauritiella armata  | Fruit Animal food Fish bait                      |
| Centro Providencia | Mauritiella armata  | Fruit Human food Beverages                       |
| Centro Providencia | Mauritiella armata  | Fruit Human food Food                            |
| Centro Providencia | Mauritiella armata  | Petiole Utensils & tools Domestic utensils       |
| Centro Providencia | Mauritiella armata  | Stem Construction Houses                         |
| Centro Providencia | Mauritiella armata  | Stem Construction Thatch                         |
| Centro Providencia | Mauritiella armata  | Stem Other Miscellaneous                         |
| Centro Providencia | Oenocarpus bacaba   | Entire leaf Construction Thatch                  |
| Centro Providencia | Oenocarpus bacaba   | Entire leaf Utensils & tools Domestic utensils   |
| Centro Providencia | Oenocarpus bacaba   | Fruit Animal food Fish bait                      |
| Centro Providencia | Oenocarpus bacaba   | Fruit Human food Beverages                       |
| Centro Providencia | Oenocarpus bacaba   | Fruit Human food Food                            |
| Centro Providencia | Oenocarpus bacaba   | Fruit Human food Oils                            |
| Centro Providencia | Oenocarpus bacaba   | Leaf sheath Cultural Recreational                |

|                    |                         |                                                            |
|--------------------|-------------------------|------------------------------------------------------------|
| Centro Providencia | Oenocarpus bacaba       | Leaf sheath Utensils & tools Domestic utensils             |
| Centro Providencia | Oenocarpus bacaba       | Leaf sheath Utensils & tools Hunting and fishing           |
| Centro Providencia | Oenocarpus bacaba       | Palm heart Human food Food                                 |
| Centro Providencia | Oenocarpus bacaba       | Petiole Utensils & tools Hunting and fishing               |
| Centro Providencia | Oenocarpus bacaba       | Spear leaf Cultural Ritual                                 |
| Centro Providencia | Oenocarpus bacaba       | Spear leaf Utensils & tools Hunting and fishing            |
| Centro Providencia | Oenocarpus bacaba       | Stem Other Miscellaneous                                   |
| Centro Providencia | Oenocarpus balickii     | Entire leaf Construction Thatch                            |
| Centro Providencia | Oenocarpus balickii     | Entire leaf Utensils & tools Domestic utensils             |
| Centro Providencia | Oenocarpus balickii     | Fruit Animal food Fish bait                                |
| Centro Providencia | Oenocarpus balickii     | Fruit Human food Beverages                                 |
| Centro Providencia | Oenocarpus balickii     | Fruit Human food Food                                      |
| Centro Providencia | Oenocarpus balickii     | Fruit Human food Oils                                      |
| Centro Providencia | Oenocarpus balickii     | Palm heart Human food Food                                 |
| Centro Providencia | Oenocarpus balickii     | Stem Cultural Ritual                                       |
| Centro Providencia | Oenocarpus balickii     | Stem Other Miscellaneous                                   |
| Centro Providencia | Oenocarpus bataua       | Entire leaf Construction Thatch                            |
| Centro Providencia | Oenocarpus bataua       | Entire leaf Utensils & tools Domestic utensils             |
| Centro Providencia | Oenocarpus bataua       | Entire leaf Utensils & tools Hunting and fishing           |
| Centro Providencia | Oenocarpus bataua       | Fruit Cultural Ritual                                      |
| Centro Providencia | Oenocarpus bataua       | Fruit Human food Beverages                                 |
| Centro Providencia | Oenocarpus bataua       | Fruit Human food Food                                      |
| Centro Providencia | Oenocarpus bataua       | Fruit Human food Oils                                      |
| Centro Providencia | Oenocarpus bataua       | Leaf rachis Utensils & tools Hunting and fishing           |
| Centro Providencia | Oenocarpus bataua       | Leaf sheath Cultural Recreational                          |
| Centro Providencia | Oenocarpus bataua       | Leaf sheath Cultural Ritual                                |
| Centro Providencia | Oenocarpus bataua       | Leaf sheath Utensils & tools Domestic utensils             |
| Centro Providencia | Oenocarpus bataua       | Leaf sheath Utensils & tools Hunting and fishing           |
| Centro Providencia | Oenocarpus bataua       | Palm heart Human food Food                                 |
| Centro Providencia | Oenocarpus bataua       | Petiole Utensils & tools Hunting and fishing               |
| Centro Providencia | Oenocarpus bataua       | Seed Animal food Fish bait                                 |
| Centro Providencia | Oenocarpus bataua       | Seed Human food Food additives                             |
| Centro Providencia | Oenocarpus bataua       | Stem Other Miscellaneous                                   |
| Centro Providencia | Oenocarpus circumtextus | Fruit Human food Beverages                                 |
| Centro Providencia | Oenocarpus circumtextus | Fruit Human food Food                                      |
| Centro Providencia | Oenocarpus mapora       | Entire leaf Construction Thatch                            |
| Centro Providencia | Oenocarpus mapora       | Entire leaf Utensils & tools Domestic utensils             |
| Centro Providencia | Oenocarpus mapora       | Fruit Human food Beverages                                 |
| Centro Providencia | Oenocarpus mapora       | Fruit Human food Food                                      |
| Centro Providencia | Socratea exorrhiza      | Entire leaf Construction Thatch                            |
| Centro Providencia | Socratea exorrhiza      | Entire leaf Utensils & tools Wrappers                      |
| Centro Providencia | Socratea exorrhiza      | Root Cultural Ritual                                       |
| Centro Providencia | Socratea exorrhiza      | Root Medicinal & veterinary Poisonings                     |
| Centro Providencia | Socratea exorrhiza      | Root Utensils & tools Domestic utensils                    |
| Centro Providencia | Socratea exorrhiza      | Root Utensils & tools Labour tools                         |
| Centro Providencia | Socratea exorrhiza      | Stem Construction Houses                                   |
| Centro Providencia | Socratea exorrhiza      | Stem Construction Other                                    |
| Centro Providencia | Socratea exorrhiza      | Stem Construction Thatch                                   |
| Centro Providencia | Socratea exorrhiza      | Stem Other Miscellaneous                                   |
| Centro Providencia | Socratea exorrhiza      | Stem Utensils & tools Domestic utensils                    |
| Centro Providencia | Socratea exorrhiza      | Stem Utensils & tools Hunting and fishing                  |
| Centro Providencia | Socratea exorrhiza      | Stem Utensils & tools Labour tools                         |
| Centro Providencia | Socratea exorrhiza      | Stem Utensils & tools Rope                                 |
| Centro Providencia | Wettinia drudei         | Stem Construction Thatch                                   |
| Centro Providencia | Wettinia drudei         | Stem Cultural Ritual                                       |
| Centro Providencia | Wettinia drudei         | Stem Utensils & tools Hunting and fishing                  |
| Camaritagua        | Astrocaryum chambira    | Entire leaf Cultural Personal adornment                    |
| Camaritagua        | Astrocaryum chambira    | Entire leaf Utensils & tools Domestic utensils             |
| Camaritagua        | Astrocaryum chambira    | Entire leaf Utensils & tools Hunting and fishing           |
| Camaritagua        | Astrocaryum chambira    | Entire leaf Utensils & tools Labour tools                  |
| Camaritagua        | Astrocaryum chambira    | Entire leaf Utensils & tools Rope                          |
| Camaritagua        | Astrocaryum chambira    | Fruit Cultural Personal adornment                          |
| Camaritagua        | Astrocaryum chambira    | Fruit Cultural Recreational                                |
| Camaritagua        | Astrocaryum chambira    | Fruit Cultural Ritual                                      |
| Camaritagua        | Astrocaryum chambira    | Fruit Human food Beverages                                 |
| Camaritagua        | Astrocaryum chambira    | Fruit Human food Food                                      |
| Camaritagua        | Astrocaryum chambira    | Palm heart Human food Food                                 |
| Camaritagua        | Astrocaryum chambira    | Seed Human food Beverages                                  |
| Camaritagua        | Astrocaryum chambira    | Seed Human food Food                                       |
| Camaritagua        | Astrocaryum chambira    | Spear leaf Cultural Clothes and accessories                |
| Camaritagua        | Astrocaryum chambira    | Spear leaf Cultural Personal adornment                     |
| Camaritagua        | Astrocaryum chambira    | Spear leaf Cultural Ritual                                 |
| Camaritagua        | Astrocaryum chambira    | Spear leaf Utensils & tools Domestic utensils              |
| Camaritagua        | Astrocaryum chambira    | Spear leaf Utensils & tools Hunting and fishing            |
| Camaritagua        | Astrocaryum chambira    | Spear leaf Utensils & tools Labour tools                   |
| Camaritagua        | Astrocaryum chambira    | Spear leaf Utensils & tools Rope                           |
| Camaritagua        | Astrocaryum chambira    | Spines Medicinal & veterinary Skin and subcutaneous tissue |
| Camaritagua        | Astrocaryum chambira    | Stem Fuel Firewood                                         |
| Camaritagua        | Astrocaryum chambira    | Stem Other Miscellaneous                                   |
| Camaritagua        | Astrocaryum ciliatum    | Entire leaf Construction Thatch                            |
| Camaritagua        | Astrocaryum ciliatum    | Entire leaf Utensils & tools Hunting and fishing           |
| Camaritagua        | Astrocaryum ciliatum    | Entire leaf Utensils & tools Rope                          |
| Camaritagua        | Astrocaryum ciliatum    | Fruit Cultural Personal adornment                          |
| Camaritagua        | Astrocaryum ciliatum    | Fruit Human food Food                                      |
| Camaritagua        | Astrocaryum ciliatum    | Petiole Medicinal & veterinary Infections and infestations |
| Camaritagua        | Astrocaryum ciliatum    | Petiole Medicinal & veterinary Respiratory system          |
| Camaritagua        | Astrocaryum ciliatum    | Petiole Utensils & tools Hunting and fishing               |



|             |                      |                                                            |
|-------------|----------------------|------------------------------------------------------------|
| Camaritagua | Astrocaryum ciliatum | Petiole Utensils & tools Rope                              |
| Camaritagua | Astrocaryum ciliatum | Seed Human food Beverages                                  |
| Camaritagua | Astrocaryum ciliatum | Seed Human food Food                                       |
| Camaritagua | Astrocaryum ciliatum | Spear leaf Utensils & tools Labour tools                   |
| Camaritagua | Astrocaryum jauari   | Fruit Animal food Fish bait                                |
| Camaritagua | Astrocaryum jauari   | Fruit Animal food Wildlife attractant                      |
| Camaritagua | Astrocaryum jauari   | Spines Medicinal & veterinary Skin and subcutaneous tissue |
| Camaritagua | Attalea insignis     | Bract Cultural Recreational                                |
| Camaritagua | Attalea insignis     | Bract Cultural Ritual                                      |
| Camaritagua | Attalea insignis     | Bract Utensils & tools Domestic utensils                   |
| Camaritagua | Attalea insignis     | Entire leaf Construction Thatch                            |
| Camaritagua | Attalea insignis     | Fruit Human food Food                                      |
| Camaritagua | Attalea insignis     | Petiole Utensils & tools Domestic utensils                 |
| Camaritagua | Attalea insignis     | Petiole Utensils & tools Hunting and fishing               |
| Camaritagua | Attalea insignis     | Seed Human food Beverages                                  |
| Camaritagua | Attalea insignis     | Seed Human food Food                                       |
| Camaritagua | Attalea insignis     | Spear leaf Cultural Personal adornment                     |
| Camaritagua | Attalea insignis     | Spear leaf Cultural Recreational                           |
| Camaritagua | Attalea insignis     | Spear leaf Cultural Ritual                                 |
| Camaritagua | Attalea maripa       | Bract Utensils & tools Domestic utensils                   |
| Camaritagua | Attalea maripa       | Entire leaf Construction Thatch                            |
| Camaritagua | Attalea maripa       | Entire plant Cultural Ritual                               |
| Camaritagua | Attalea maripa       | Fruit Cultural Recreational                                |
| Camaritagua | Attalea maripa       | Fruit Human food Beverages                                 |
| Camaritagua | Attalea maripa       | Fruit Human food Food                                      |
| Camaritagua | Attalea maripa       | Fruit Medicinal & veterinary Digestive system              |
| Camaritagua | Attalea maripa       | Fruit Medicinal & veterinary Respiratory system            |
| Camaritagua | Attalea maripa       | Petiole Utensils & tools Domestic utensils                 |
| Camaritagua | Attalea maripa       | Petiole Utensils & tools Hunting and fishing               |
| Camaritagua | Attalea maripa       | Seed Human food Beverages                                  |
| Camaritagua | Attalea maripa       | Seed Human food Food                                       |
| Camaritagua | Attalea maripa       | Spear leaf Construction Thatch                             |
| Camaritagua | Attalea maripa       | Spear leaf Cultural Personal adornment                     |
| Camaritagua | Attalea maripa       | Spear leaf Cultural Recreational                           |
| Camaritagua | Attalea maripa       | Spear leaf Cultural Ritual                                 |
| Camaritagua | Attalea maripa       | Stem Cultural Recreational                                 |
| Camaritagua | Attalea maripa       | Stem Fuel Firewood                                         |
| Camaritagua | Attalea maripa       | Stem Human food Food additives                             |
| Camaritagua | Attalea maripa       | Stem Other Miscellaneous                                   |
| Camaritagua | Attalea microcarpa   | Bract Utensils & tools Domestic utensils                   |
| Camaritagua | Attalea microcarpa   | Entire leaf Construction Thatch                            |
| Camaritagua | Attalea microcarpa   | Entire leaf Utensils & tools Domestic utensils             |
| Camaritagua | Attalea microcarpa   | Entire leaf Utensils & tools Hunting and fishing           |
| Camaritagua | Attalea microcarpa   | Fruit Human food Food                                      |
| Camaritagua | Attalea microcarpa   | Petiole Utensils & tools Hunting and fishing               |
| Camaritagua | Attalea microcarpa   | Seed Human food Food                                       |
| Camaritagua | Attalea microcarpa   | Spear leaf Cultural Recreational                           |
| Camaritagua | Attalea microcarpa   | Spear leaf Cultural Ritual                                 |
| Camaritagua | Attalea microcarpa   | Spear leaf Utensils & tools Domestic utensils              |
| Camaritagua | Attalea peruviana    | Entire leaf Construction Houses                            |
| Camaritagua | Attalea peruviana    | Entire leaf Construction Thatch                            |
| Camaritagua | Attalea peruviana    | Entire leaf Utensils & tools Domestic utensils             |
| Camaritagua | Attalea peruviana    | Entire leaf Utensils & tools Hunting and fishing           |
| Camaritagua | Attalea peruviana    | Entire leaf Utensils & tools Wrappers                      |
| Camaritagua | Attalea peruviana    | Petiole Utensils & tools Domestic utensils                 |
| Camaritagua | Attalea peruviana    | Petiole Utensils & tools Hunting and fishing               |
| Camaritagua | Attalea peruviana    | Seed Human food Food                                       |
| Camaritagua | Attalea peruviana    | Spear leaf Cultural Recreational                           |
| Camaritagua | Attalea peruviana    | Spear leaf Utensils & tools Domestic utensils              |
| Camaritagua | Attalea peruviana    | Stem Other Miscellaneous                                   |
| Camaritagua | Attalea septuagenata | Fruit Human food Food                                      |
| Camaritagua | Attalea septuagenata | Petiole Utensils & tools Domestic utensils                 |
| Camaritagua | Attalea septuagenata | Petiole Utensils & tools Hunting and fishing               |
| Camaritagua | Attalea septuagenata | Seed Human food Beverages                                  |
| Camaritagua | Attalea septuagenata | Seed Human food Food                                       |
| Camaritagua | Bactris acanthocarpa | Entire plant Cultural Recreational                         |
| Camaritagua | Bactris acanthocarpa | Fruit Human food Food                                      |
| Camaritagua | Bactris acanthocarpa | Petiole Utensils & tools Labour tools                      |
| Camaritagua | Bactris acanthocarpa | Stem Construction Thatch                                   |
| Camaritagua | Bactris acanthocarpa | Stem Utensils & tools Domestic utensils                    |
| Camaritagua | Bactris bidentula    | Fruit Animal food Fish bait                                |
| Camaritagua | Bactris bidentula    | Fruit Human food Food                                      |
| Camaritagua | Bactris bidentula    | Stem Construction Thatch                                   |
| Camaritagua | Bactris concinna     | Fruit Animal food Fish bait                                |
| Camaritagua | Bactris concinna     | Fruit Human food Food                                      |
| Camaritagua | Bactris concinna     | Seed Human food Food                                       |
| Camaritagua | Bactris fissifrons   | Entire leaf Utensils & tools Hunting and fishing           |
| Camaritagua | Bactris fissifrons   | Seed Human food Beverages                                  |
| Camaritagua | Bactris hirta        | Leaf rachis Utensils & tools Labour tools                  |
| Camaritagua | Bactris hirta        | Petiole Utensils & tools Labour tools                      |
| Camaritagua | Bactris killipii     | Entire leaf Construction Thatch                            |
| Camaritagua | Bactris killipii     | Entire leaf Cultural Cosmetic                              |
| Camaritagua | Bactris macroacantha | Entire leaf Construction Thatch                            |
| Camaritagua | Bactris macroacantha | Entire plant Cultural Recreational                         |
| Camaritagua | Bactris macroacantha | Entire plant Fuel Firewood                                 |
| Camaritagua | Bactris macroacantha | Petiole Utensils & tools Labour tools                      |
| Camaritagua | Bactris macroacantha | Spines Medicinal & veterinary Skin and subcutaneous tissue |

|             |                          |                                                                       |
|-------------|--------------------------|-----------------------------------------------------------------------|
| Camaritagua | Bactris maraja           | Fruit Human food Food                                                 |
| Camaritagua | Bactris maraja           | Petiole Utensils & tools Domestic utensils                            |
| Camaritagua | Bactris maraja           | Petiole Utensils & tools Hunting and fishing                          |
| Camaritagua | Bactris maraja           | Seed Human food Food                                                  |
| Camaritagua | Bactris maraja           | Stem Construction Thatch                                              |
| Camaritagua | Bactris maraja           | Stem Utensils & tools Domestic utensils                               |
| Camaritagua | Bactris maraja           | Stem Utensils & tools Hunting and fishing                             |
| Camaritagua | Bactris riparia          | Fruit Animal food Fish bait                                           |
| Camaritagua | Bactris riparia          | Fruit Human food Food                                                 |
| Camaritagua | Chamaedorea pauciflora   | Entire leaf Cultural Cosmetic                                         |
| Camaritagua | Chamaedorea pauciflora   | Entire leaf Utensils & tools Wrappers                                 |
| Camaritagua | Chamaedorea pinnatifrons | Seed Utensils & tools Other                                           |
| Camaritagua | Desmoncus mitis          | Stem Medicinal & veterinary Skin and subcutaneous tissue              |
| Camaritagua | Desmoncus mitis          | Stem Utensils & tools Domestic utensils                               |
| Camaritagua | Desmoncus mitis          | Stem Utensils & tools Rope                                            |
| Camaritagua | Desmoncus polyacanthos   | Spear leaf Utensils & tools Domestic utensils                         |
| Camaritagua | Desmoncus polyacanthos   | Stem Utensils & tools Domestic utensils                               |
| Camaritagua | Desmoncus polyacanthos   | Stem Utensils & tools Rope                                            |
| Camaritagua | Euterpe catinga          | Entire leaf Construction Thatch                                       |
| Camaritagua | Euterpe catinga          | Entire leaf Utensils & tools Domestic utensils                        |
| Camaritagua | Euterpe catinga          | Entire leaf Utensils & tools Hunting and fishing                      |
| Camaritagua | Euterpe catinga          | Fruit Human food Beverages                                            |
| Camaritagua | Euterpe catinga          | Fruit Human food Food                                                 |
| Camaritagua | Euterpe catinga          | Stem Construction Houses                                              |
| Camaritagua | Euterpe precatoria       | Entire leaf Construction Thatch                                       |
| Camaritagua | Euterpe precatoria       | Entire leaf Utensils & tools Domestic utensils                        |
| Camaritagua | Euterpe precatoria       | Entire plant Fuel Firewood                                            |
| Camaritagua | Euterpe precatoria       | Fruit Animal food Fish bait                                           |
| Camaritagua | Euterpe precatoria       | Fruit Cultural Dyes                                                   |
| Camaritagua | Euterpe precatoria       | Fruit Human food Beverages                                            |
| Camaritagua | Euterpe precatoria       | Fruit Human food Food                                                 |
| Camaritagua | Euterpe precatoria       | Palm heart Human food Food                                            |
| Camaritagua | Euterpe precatoria       | Root Medicinal & veterinary Digestive system                          |
| Camaritagua | Euterpe precatoria       | Root Medicinal & veterinary General Ailments with Unspecific Symptoms |
| Camaritagua | Euterpe precatoria       | Root Medicinal & veterinary Other                                     |
| Camaritagua | Euterpe precatoria       | Root Medicinal & veterinary Respiratory system                        |
| Camaritagua | Euterpe precatoria       | Seed Utensils & tools Other                                           |
| Camaritagua | Euterpe precatoria       | Spear leaf Cultural Ritual                                            |
| Camaritagua | Euterpe precatoria       | Stem Construction Houses                                              |
| Camaritagua | Euterpe precatoria       | Stem Construction Thatch                                              |
| Camaritagua | Euterpe precatoria       | Stem Fuel Fire starter                                                |
| Camaritagua | Euterpe precatoria       | Stem Fuel Firewood                                                    |
| Camaritagua | Euterpe precatoria       | Stem Other Miscellaneous                                              |
| Camaritagua | Geonoma deversa          | Entire leaf Construction Thatch                                       |
| Camaritagua | Geonoma deversa          | Entire leaf Utensils & tools Wrappers                                 |
| Camaritagua | Geonoma deversa          | Entire plant Cultural Recreational                                    |
| Camaritagua | Geonoma macrostachys     | Entire leaf Construction Thatch                                       |
| Camaritagua | Geonoma macrostachys     | Entire leaf Utensils & tools Domestic utensils                        |
| Camaritagua | Geonoma macrostachys     | Entire leaf Utensils & tools Wrappers                                 |
| Camaritagua | Geonoma maxima           | Entire leaf Construction Thatch                                       |
| Camaritagua | Geonoma maxima           | Stem Utensils & tools Domestic utensils                               |
| Camaritagua | Hyospathe elegans        | Entire leaf Construction Thatch                                       |
| Camaritagua | Hyospathe elegans        | Entire leaf Utensils & tools Domestic utensils                        |
| Camaritagua | Hyospathe elegans        | Entire leaf Utensils & tools Wrappers                                 |
| Camaritagua | Hyospathe elegans        | Entire plant Cultural Recreational                                    |
| Camaritagua | Iriartea deltoidea       | Entire leaf Construction Thatch                                       |
| Camaritagua | Iriartea deltoidea       | Entire plant Fuel Firewood                                            |
| Camaritagua | Iriartea deltoidea       | Root Utensils & tools Domestic utensils                               |
| Camaritagua | Iriartea deltoidea       | Seed Cultural Personal adornment                                      |
| Camaritagua | Iriartea deltoidea       | Stem Construction Houses                                              |
| Camaritagua | Iriartea deltoidea       | Stem Construction Other                                               |
| Camaritagua | Iriartea deltoidea       | Stem Construction Thatch                                              |
| Camaritagua | Iriartea deltoidea       | Stem Construction Transportation                                      |
| Camaritagua | Iriartea deltoidea       | Stem Cultural Ritual                                                  |
| Camaritagua | Iriartea deltoidea       | Stem Fuel Firewood                                                    |
| Camaritagua | Iriartea deltoidea       | Stem Other Miscellaneous                                              |
| Camaritagua | Iriartea deltoidea       | Stem Utensils & tools Domestic utensils                               |
| Camaritagua | Iriartella setigera      | Entire leaf Construction Thatch                                       |
| Camaritagua | Iriartella setigera      | Palm heart Medicinal & veterinary Poisonings                          |
| Camaritagua | Iriartella setigera      | Petiole Utensils & tools Domestic utensils                            |
| Camaritagua | Iriartella setigera      | Petiole Utensils & tools Hunting and fishing                          |
| Camaritagua | Iriartella setigera      | Stem Construction Thatch                                              |
| Camaritagua | Iriartella setigera      | Stem Utensils & tools Domestic utensils                               |
| Camaritagua | Iriartella setigera      | Stem Utensils & tools Hunting and fishing                             |
| Camaritagua | Iriartella setigera      | Stem Utensils & tools Other                                           |
| Camaritagua | Lepidocaryum tenue       | Entire leaf Construction Houses                                       |
| Camaritagua | Lepidocaryum tenue       | Entire leaf Construction Thatch                                       |
| Camaritagua | Lepidocaryum tenue       | Palm heart Medicinal & veterinary Digestive system                    |
| Camaritagua | Lepidocaryum tenue       | Palm heart Medicinal & veterinary Respiratory system                  |
| Camaritagua | Lepidocaryum tenue       | Petiole Cultural Ritual                                               |
| Camaritagua | Lepidocaryum tenue       | Spear leaf Utensils & tools Hunting and fishing                       |
| Camaritagua | Manicaria martiana       | Entire leaf Construction Thatch                                       |
| Camaritagua | Manicaria saccifera      | Entire leaf Construction Thatch                                       |
| Camaritagua | Mauritia carana          | Entire leaf Construction Thatch                                       |
| Camaritagua | Mauritia carana          | Fruit Human food Food                                                 |
| Camaritagua | Mauritia carana          | Leaf sheath Utensils & tools Domestic utensils                        |
| Camaritagua | Mauritia carana          | Stem Other Miscellaneous                                              |

|             |                         |                                                          |
|-------------|-------------------------|----------------------------------------------------------|
| Camaritagua | Mauritia flexuosa       | Entire leaf Construction Thatch                          |
| Camaritagua | Mauritia flexuosa       | Entire leaf Cultural Recreational                        |
| Camaritagua | Mauritia flexuosa       | Entire leaf Other Miscellaneous                          |
| Camaritagua | Mauritia flexuosa       | Fruit Animal food Fish bait                              |
| Camaritagua | Mauritia flexuosa       | Fruit Animal food Wildlife attractant                    |
| Camaritagua | Mauritia flexuosa       | Fruit Cultural Ritual                                    |
| Camaritagua | Mauritia flexuosa       | Fruit Human food Beverages                               |
| Camaritagua | Mauritia flexuosa       | Fruit Human food Food                                    |
| Camaritagua | Mauritia flexuosa       | Fruit Human food Oils                                    |
| Camaritagua | Mauritia flexuosa       | Petiole Cultural Ritual                                  |
| Camaritagua | Mauritia flexuosa       | Petiole Utensils & tools Domestic utensils               |
| Camaritagua | Mauritia flexuosa       | Spear leaf Cultural Recreational                         |
| Camaritagua | Mauritia flexuosa       | Spear leaf Cultural Ritual                               |
| Camaritagua | Mauritia flexuosa       | Stem Construction Houses                                 |
| Camaritagua | Mauritia flexuosa       | Stem Construction Transportation                         |
| Camaritagua | Mauritia flexuosa       | Stem Other Miscellaneous                                 |
| Camaritagua | Mauritiella armata      | Fruit Animal food Fish bait                              |
| Camaritagua | Mauritiella armata      | Fruit Human food Food                                    |
| Camaritagua | Mauritiella armata      | Stem Construction Houses                                 |
| Camaritagua | Mauritiella armata      | Stem Other Miscellaneous                                 |
| Camaritagua | Oenocarpus bacaba       | Entire leaf Construction Thatch                          |
| Camaritagua | Oenocarpus bacaba       | Entire leaf Other Miscellaneous                          |
| Camaritagua | Oenocarpus bacaba       | Entire plant Fuel Firewood                               |
| Camaritagua | Oenocarpus bacaba       | Fruit Human food Beverages                               |
| Camaritagua | Oenocarpus bacaba       | Fruit Human food Food                                    |
| Camaritagua | Oenocarpus bacaba       | Fruit Human food Oils                                    |
| Camaritagua | Oenocarpus bacaba       | Palm heart Human food Food                               |
| Camaritagua | Oenocarpus bacaba       | Stem Other Miscellaneous                                 |
| Camaritagua | Oenocarpus balickii     | Entire leaf Other Miscellaneous                          |
| Camaritagua | Oenocarpus balickii     | Fruit Human food Beverages                               |
| Camaritagua | Oenocarpus balickii     | Fruit Human food Food                                    |
| Camaritagua | Oenocarpus balickii     | Palm heart Human food Food                               |
| Camaritagua | Oenocarpus balickii     | Stem Other Miscellaneous                                 |
| Camaritagua | Oenocarpus bataua       | Entire leaf Construction Thatch                          |
| Camaritagua | Oenocarpus bataua       | Entire leaf Cultural Recreational                        |
| Camaritagua | Oenocarpus bataua       | Entire leaf Fuel Other                                   |
| Camaritagua | Oenocarpus bataua       | Entire leaf Other Miscellaneous                          |
| Camaritagua | Oenocarpus bataua       | Entire leaf Utensils & tools Domestic utensils           |
| Camaritagua | Oenocarpus bataua       | Entire plant Fuel Firewood                               |
| Camaritagua | Oenocarpus bataua       | Fruit Animal food Wildlife attractant                    |
| Camaritagua | Oenocarpus bataua       | Fruit Human food Beverages                               |
| Camaritagua | Oenocarpus bataua       | Fruit Human food Food                                    |
| Camaritagua | Oenocarpus bataua       | Fruit Human food Oils                                    |
| Camaritagua | Oenocarpus bataua       | Inflorescence Cultural Ritual                            |
| Camaritagua | Oenocarpus bataua       | Leaf sheath Cultural Ritual                              |
| Camaritagua | Oenocarpus bataua       | Leaf sheath Utensils & tools Hunting and fishing         |
| Camaritagua | Oenocarpus bataua       | Palm heart Human food Food                               |
| Camaritagua | Oenocarpus bataua       | Stem Construction Houses                                 |
| Camaritagua | Oenocarpus bataua       | Stem Other Miscellaneous                                 |
| Camaritagua | Oenocarpus circumtextus | Entire leaf Construction Thatch                          |
| Camaritagua | Oenocarpus circumtextus | Fruit Human food Beverages                               |
| Camaritagua | Oenocarpus circumtextus | Fruit Human food Food                                    |
| Camaritagua | Oenocarpus circumtextus | Fruit Human food Oils                                    |
| Camaritagua | Oenocarpus circumtextus | Palm heart Human food Food                               |
| Camaritagua | Oenocarpus mapora       | Entire leaf Construction Thatch                          |
| Camaritagua | Oenocarpus mapora       | Entire leaf Other Miscellaneous                          |
| Camaritagua | Oenocarpus mapora       | Entire leaf Utensils & tools Domestic utensils           |
| Camaritagua | Oenocarpus mapora       | Fruit Human food Beverages                               |
| Camaritagua | Oenocarpus mapora       | Fruit Human food Food                                    |
| Camaritagua | Oenocarpus mapora       | Palm heart Human food Food                               |
| Camaritagua | Oenocarpus mapora       | Petiole Utensils & tools Domestic utensils               |
| Camaritagua | Oenocarpus mapora       | Stem Other Miscellaneous                                 |
| Camaritagua | Socratea exorrhiza      | Entire leaf Construction Thatch                          |
| Camaritagua | Socratea exorrhiza      | Root Medicinal & veterinary Poisonings                   |
| Camaritagua | Socratea exorrhiza      | Root Medicinal & veterinary Veterinary                   |
| Camaritagua | Socratea exorrhiza      | Root Utensils & tools Domestic utensils                  |
| Camaritagua | Socratea exorrhiza      | Seed Cultural Personal adornment                         |
| Camaritagua | Socratea exorrhiza      | Seed Utensils & tools Other                              |
| Camaritagua | Socratea exorrhiza      | Stem Construction Houses                                 |
| Camaritagua | Socratea exorrhiza      | Stem Construction Thatch                                 |
| Camaritagua | Socratea exorrhiza      | Stem Utensils & tools Hunting and fishing                |
| Buena Vista | Alphanes horrida        | Seed Human food Food                                     |
| Buena Vista | Attalea princeps        | Bract Cultural Recreational                              |
| Buena Vista | Attalea princeps        | Entire leaf Construction Thatch                          |
| Buena Vista | Attalea princeps        | Fruit Human food Food                                    |
| Buena Vista | Attalea princeps        | Fruit Human food Oils                                    |
| Buena Vista | Attalea princeps        | Leaf rachis Utensils & tools Domestic utensils           |
| Buena Vista | Attalea princeps        | Palm heart Human food Food                               |
| Buena Vista | Attalea princeps        | Root Medicinal & veterinary Respiratory system           |
| Buena Vista | Attalea princeps        | Seed Cultural Cosmetic                                   |
| Buena Vista | Attalea princeps        | Seed Medicinal & veterinary Skin and subcutaneous tissue |
| Buena Vista | Attalea princeps        | Seed Other Miscellaneous                                 |
| Buena Vista | Attalea princeps        | Spear leaf Cultural Clothes and accessories              |
| Buena Vista | Attalea princeps        | Spear leaf Utensils & tools Domestic utensils            |
| Buena Vista | Bactris concinna        | Fruit Human food Food                                    |
| Buena Vista | Bactris concinna        | Stem Utensils & tools Hunting and fishing                |
| Buena Vista | Bactris maraja          | Fruit Human food Food                                    |

|             |                          |                                                           |
|-------------|--------------------------|-----------------------------------------------------------|
| Buena Vista | Bactris maraja           | Seed Human food Food                                      |
| Buena Vista | Bactris maraja           | Stem Construction Houses                                  |
| Buena Vista | Chamaedorea angustisecta | Flower Cultural Cosmetic                                  |
| Buena Vista | Chamaedorea angustisecta | Flower Medicinal & veterinary Respiratory system          |
| Buena Vista | Euterpe precatoria       | Entire leaf Construction Thatch                           |
| Buena Vista | Euterpe precatoria       | Fruit Human food Beverages                                |
| Buena Vista | Euterpe precatoria       | Fruit Human food Oils                                     |
| Buena Vista | Euterpe precatoria       | Fruit Medicinal & veterinary Skin and subcutaneous tissue |
| Buena Vista | Euterpe precatoria       | Palm heart Human food Food                                |
| Buena Vista | Euterpe precatoria       | Root Medicinal & veterinary Urinary system                |
| Buena Vista | Euterpe precatoria       | Spear leaf Utensils & tools Domestic utensils             |
| Buena Vista | Euterpe precatoria       | Stem Construction Houses                                  |
| Buena Vista | Geonoma deversa          | Entire leaf Construction Thatch                           |
| Buena Vista | Iriartea deltoidea       | Entire leaf Construction Thatch                           |
| Buena Vista | Iriartea deltoidea       | Palm heart Human food Food                                |
| Buena Vista | Iriartea deltoidea       | Stem Construction Houses                                  |
| Buena Vista | Mauritia flexuosa        | Entire leaf Construction Thatch                           |
| Buena Vista | Mauritia flexuosa        | Fruit Human food Beverages                                |
| Buena Vista | Mauritia flexuosa        | Fruit Human food Food                                     |
| Buena Vista | Mauritia flexuosa        | Fruit Human food Oils                                     |
| Buena Vista | Mauritia flexuosa        | Spear leaf Cultural Clothes and accessories               |
| Buena Vista | Mauritia flexuosa        | Spear leaf Utensils & tools Domestic utensils             |
| Buena Vista | Mauritia flexuosa        | Spear leaf Utensils & tools Rope                          |
| Buena Vista | Oenocarpus bataua        | Fruit Human food Beverages                                |
| Buena Vista | Oenocarpus bataua        | Fruit Human food Food                                     |
| Buena Vista | Oenocarpus bataua        | Fruit Human food Oils                                     |
| Buena Vista | Oenocarpus bataua        | Palm heart Human food Food                                |
| Buena Vista | Oenocarpus bataua        | Spear leaf Utensils & tools Domestic utensils             |
| Buena Vista | Oenocarpus bataua        | Stem Other Miscellaneous                                  |
| Buena Vista | Oenocarpus bataua        | Stem Utensils & tools Hunting and fishing                 |
| Buena Vista | Oenocarpus mapora        | Entire leaf Construction Thatch                           |
| Buena Vista | Oenocarpus mapora        | Fruit Human food Beverages                                |
| Buena Vista | Oenocarpus mapora        | Fruit Human food Oils                                     |
| Buena Vista | Oenocarpus mapora        | Stem Construction Houses                                  |
| Buena Vista | Phytelephas macrocarpa   | Entire leaf Construction Thatch                           |
| Buena Vista | Phytelephas macrocarpa   | Fruit Human food Food                                     |
| Buena Vista | Phytelephas macrocarpa   | Seed Cultural Personal adornment                          |
| Buena Vista | Phytelephas macrocarpa   | Seed Human food Food                                      |
| Buena Vista | Phytelephas macrocarpa   | Stem Construction Houses                                  |
| Buena Vista | Socratea exorrhiza       | Seed Cultural Personal adornment                          |
| Buena Vista | Socratea exorrhiza       | Stem Construction Houses                                  |
| Buena Vista | Socratea exorrhiza       | Stem Utensils & tools Domestic utensils                   |
| Aviacion    | Astrocaryum chambira     | Entire leaf Construction Thatch                           |
| Aviacion    | Astrocaryum chambira     | Fruit Cultural Recreational                               |
| Aviacion    | Astrocaryum chambira     | Fruit Human food Food                                     |
| Aviacion    | Astrocaryum chambira     | Fruit Utensils & tools Domestic utensils                  |
| Aviacion    | Astrocaryum chambira     | Palm heart Human food Food                                |
| Aviacion    | Astrocaryum chambira     | Spear leaf Utensils & tools Domestic utensils             |
| Aviacion    | Astrocaryum huicungo     | Entire leaf Construction Thatch                           |
| Aviacion    | Astrocaryum huicungo     | Fruit Human food Food                                     |
| Aviacion    | Astrocaryum huicungo     | Fruit Utensils & tools Domestic utensils                  |
| Aviacion    | Astrocaryum huicungo     | Palm heart Human food Food                                |
| Aviacion    | Astrocaryum huicungo     | Root Medicinal & veterinary Digestive system              |
| Aviacion    | Astrocaryum huicungo     | Stem Construction Houses                                  |
| Aviacion    | Astrocaryum huicungo     | Stem Other Miscellaneous                                  |
| Aviacion    | Attalea moorei           | Entire leaf Construction Thatch                           |
| Aviacion    | Attalea moorei           | Fruit Human food Food                                     |
| Aviacion    | Attalea moorei           | Palm heart Human food Food                                |
| Aviacion    | Attalea moorei           | Seed Human food Food                                      |
| Aviacion    | Attalea moorei           | Stem Construction Houses                                  |
| Aviacion    | Attalea moorei           | Stem Cultural Cosmetic                                    |
| Aviacion    | Attalea moorei           | Stem Other Miscellaneous                                  |
| Aviacion    | Bactris concinna         | Fruit Human food Food                                     |
| Aviacion    | Bactris concinna         | Stem Utensils & tools Hunting and fishing                 |
| Aviacion    | Euterpe precatoria       | Fruit Human food Food                                     |
| Aviacion    | Euterpe precatoria       | Palm heart Human food Food                                |
| Aviacion    | Euterpe precatoria       | Root Medicinal & veterinary Infections and infestations   |
| Aviacion    | Euterpe precatoria       | Root Medicinal & veterinary Not specified at all          |
| Aviacion    | Euterpe precatoria       | Root Medicinal & veterinary Urinary system                |
| Aviacion    | Euterpe precatoria       | Spear leaf Utensils & tools Domestic utensils             |
| Aviacion    | Euterpe precatoria       | Stem Construction Houses                                  |
| Aviacion    | Geonoma macrostachys     | Entire leaf Construction Thatch                           |
| Aviacion    | Hyospathe elegans        | Stem Utensils & tools Domestic utensils                   |
| Aviacion    | Iriartea deltoidea       | Entire leaf Construction Thatch                           |
| Aviacion    | Iriartea deltoidea       | Fruit Human food Food                                     |
| Aviacion    | Iriartea deltoidea       | Palm heart Human food Food                                |
| Aviacion    | Iriartea deltoidea       | Seed Cultural Personal adornment                          |
| Aviacion    | Iriartea deltoidea       | Stem Construction Houses                                  |
| Aviacion    | Iriartea deltoidea       | Stem Construction Transportation                          |
| Aviacion    | Iriartea deltoidea       | Stem Utensils & tools Domestic utensils                   |
| Aviacion    | Mauritia flexuosa        | Entire leaf Construction Thatch                           |
| Aviacion    | Mauritia flexuosa        | Fruit Human food Beverages                                |
| Aviacion    | Mauritia flexuosa        | Fruit Human food Food                                     |
| Aviacion    | Mauritia flexuosa        | Palm heart Human food Food                                |
| Aviacion    | Mauritia flexuosa        | Petiole Construction Houses                               |
| Aviacion    | Mauritia flexuosa        | Petiole Utensils & tools Domestic utensils                |
| Aviacion    | Mauritia flexuosa        | Seed Cultural Other                                       |

|           |                        |                                                            |
|-----------|------------------------|------------------------------------------------------------|
| Aviacion  | Mauritia flexuosa      | Spear leaf Fuel Firewood                                   |
| Aviacion  | Mauritia flexuosa      | Spear leaf Utensils & tools Domestic utensils              |
| Aviacion  | Mauritia flexuosa      | Stem Other Miscellaneous                                   |
| Aviacion  | Oenocarpus bataua      | Entire leaf Construction Thatch                            |
| Aviacion  | Oenocarpus bataua      | Fruit Human food Beverages                                 |
| Aviacion  | Oenocarpus bataua      | Fruit Human food Food                                      |
| Aviacion  | Oenocarpus bataua      | Fruit Human food Oils                                      |
| Aviacion  | Oenocarpus bataua      | Palm heart Human food Food                                 |
| Aviacion  | Oenocarpus bataua      | Stem Construction Houses                                   |
| Aviacion  | Oenocarpus bataua      | Stem Other Miscellaneous                                   |
| Aviacion  | Oenocarpus mapora      | Entire leaf Construction Thatch                            |
| Aviacion  | Oenocarpus mapora      | Fruit Human food Beverages                                 |
| Aviacion  | Oenocarpus mapora      | Fruit Human food Food                                      |
| Aviacion  | Oenocarpus mapora      | Fruit Human food Oils                                      |
| Aviacion  | Oenocarpus mapora      | Palm heart Human food Food                                 |
| Aviacion  | Oenocarpus mapora      | Seed Human food Food                                       |
| Aviacion  | Oenocarpus mapora      | Stem Construction Houses                                   |
| Aviacion  | Oenocarpus mapora      | Stem Construction Thatch                                   |
| Aviacion  | Phytelephas macrocarpa | Entire leaf Construction Thatch                            |
| Aviacion  | Phytelephas macrocarpa | Fruit Human food Food                                      |
| Aviacion  | Phytelephas macrocarpa | Seed Cultural Personal adornment                           |
| Aviacion  | Phytelephas macrocarpa | Seed Human food Food                                       |
| Aviacion  | Phytelephas macrocarpa | Spear leaf Utensils & tools Domestic utensils              |
| Aviacion  | Socratea exorrhiza     | Entire leaf Construction Thatch                            |
| Aviacion  | Socratea exorrhiza     | Palm heart Human food Food                                 |
| Aviacion  | Socratea exorrhiza     | Petiole Fuel Fire starter                                  |
| Aviacion  | Socratea exorrhiza     | Root Cultural Cosmetic                                     |
| Aviacion  | Socratea exorrhiza     | Root Fuel Firewood                                         |
| Aviacion  | Socratea exorrhiza     | Seed Cultural Personal adornment                           |
| Aviacion  | Socratea exorrhiza     | Seed Utensils & tools Domestic utensils                    |
| Aviacion  | Socratea exorrhiza     | Stem Construction Houses                                   |
| Aviacion  | Socratea exorrhiza     | Stem Utensils & tools Domestic utensils                    |
| Aviacion  | Socratea salazarii     | Entire leaf Construction Thatch                            |
| Aviacion  | Socratea salazarii     | Fruit Cultural Personal adornment                          |
| Aviacion  | Socratea salazarii     | Fruit Utensils & tools Domestic utensils                   |
| Aviacion  | Socratea salazarii     | Palm heart Human food Food                                 |
| Aviacion  | Socratea salazarii     | Root Cultural Ritual                                       |
| Aviacion  | Socratea salazarii     | Root Fuel Firewood                                         |
| Aviacion  | Socratea salazarii     | Stem Construction Bridges                                  |
| Aviacion  | Socratea salazarii     | Stem Construction Houses                                   |
| Aviacion  | Socratea salazarii     | Stem Other Miscellaneous                                   |
| Aviacion  | Socratea salazarii     | Stem Utensils & tools Domestic utensils                    |
| Aviacion  | Socratea salazarii     | Stem Utensils & tools Hunting and fishing                  |
| Aviacion  | Socratea salazarii     | Stem Utensils & tools Labour tools                         |
| Aviacion  | Wettinia maynensis     | Entire leaf Construction Thatch                            |
| Aviacion  | Wettinia maynensis     | Spear leaf Utensils & tools Domestic utensils              |
| Aviacion  | Wettinia maynensis     | Stem Construction Houses                                   |
| Aviacion  | Wettinia maynensis     | Stem Utensils & tools Domestic utensils                    |
| Angostura | Astrocaryum chambira   | Entire leaf Utensils & tools Hunting and fishing           |
| Angostura | Astrocaryum chambira   | Fruit Cultural Personal adornment                          |
| Angostura | Astrocaryum chambira   | Fruit Cultural Ritual                                      |
| Angostura | Astrocaryum chambira   | Fruit Human food Food                                      |
| Angostura | Astrocaryum chambira   | Leaf rachis Utensils & tools Rope                          |
| Angostura | Astrocaryum chambira   | Petiole Utensils & tools Domestic utensils                 |
| Angostura | Astrocaryum chambira   | Seed Human food Food                                       |
| Angostura | Astrocaryum chambira   | Spear leaf Cultural Personal adornment                     |
| Angostura | Astrocaryum chambira   | Spear leaf Cultural Ritual                                 |
| Angostura | Astrocaryum chambira   | Spear leaf Utensils & tools Domestic utensils              |
| Angostura | Astrocaryum chambira   | Spear leaf Utensils & tools Hunting and fishing            |
| Angostura | Astrocaryum chambira   | Spear leaf Utensils & tools Rope                           |
| Angostura | Astrocaryum chambira   | Spines Medicinal & veterinary Skin and subcutaneous tissue |
| Angostura | Astrocaryum chambira   | Spines Utensils & tools Hunting and fishing                |
| Angostura | Astrocaryum chambira   | Stem Other Miscellaneous                                   |
| Angostura | Astrocaryum ciliatum   | Seed Human food Food                                       |
| Angostura | Astrocaryum jauari     | Fruit Animal food Fish bait                                |
| Angostura | Attalea insignis       | Bract Cultural Recreational                                |
| Angostura | Attalea insignis       | Entire leaf Construction Thatch                            |
| Angostura | Attalea insignis       | Fruit Human food Food                                      |
| Angostura | Attalea insignis       | Petiole Utensils & tools Hunting and fishing               |
| Angostura | Attalea insignis       | Seed Human food Food                                       |
| Angostura | Attalea insignis       | Spear leaf Cultural Ritual                                 |
| Angostura | Attalea maripa         | Entire leaf Construction Houses                            |
| Angostura | Attalea maripa         | Entire leaf Construction Thatch                            |
| Angostura | Attalea maripa         | Entire plant Human food Food additives                     |
| Angostura | Attalea maripa         | Fruit Human food Beverages                                 |
| Angostura | Attalea maripa         | Fruit Human food Food                                      |
| Angostura | Attalea maripa         | Fruit Human food Food additives                            |
| Angostura | Attalea maripa         | Palm heart Human food Food                                 |
| Angostura | Attalea maripa         | Petiole Cultural Recreational                              |
| Angostura | Attalea maripa         | Petiole Utensils & tools Hunting and fishing               |
| Angostura | Attalea maripa         | Petiole Utensils & tools Labour tools                      |
| Angostura | Attalea maripa         | Seed Cultural Ritual                                       |
| Angostura | Attalea maripa         | Seed Human food Food                                       |
| Angostura | Attalea maripa         | Seed Other Miscellaneous                                   |
| Angostura | Attalea maripa         | Spear leaf Cultural Recreational                           |
| Angostura | Attalea maripa         | Spear leaf Cultural Ritual                                 |
| Angostura | Attalea maripa         | Stem Cultural Recreational                                 |

|           |                        |                                                      |
|-----------|------------------------|------------------------------------------------------|
| Angostura | Attalea maripa         | Stem Other Miscellaneous                             |
| Angostura | Attalea microcarpa     | Bract Cultural Recreational                          |
| Angostura | Attalea microcarpa     | Entire leaf Construction Houses                      |
| Angostura | Attalea microcarpa     | Entire leaf Construction Thatch                      |
| Angostura | Attalea microcarpa     | Fruit Human food Food                                |
| Angostura | Attalea microcarpa     | Petiole Utensils & tools Hunting and fishing         |
| Angostura | Attalea microcarpa     | Seed Human food Food                                 |
| Angostura | Attalea microcarpa     | Spear leaf Cultural Personal adornment               |
| Angostura | Attalea microcarpa     | Spear leaf Cultural Recreational                     |
| Angostura | Attalea microcarpa     | Spear leaf Cultural Ritual                           |
| Angostura | Attalea microcarpa     | Spear leaf Utensils & tools Domestic utensils        |
| Angostura | Attalea septuagenata   | Entire leaf Construction Thatch                      |
| Angostura | Attalea septuagenata   | Petiole Utensils & tools Hunting and fishing         |
| Angostura | Attalea septuagenata   | Petiole Utensils & tools Labour tools                |
| Angostura | Attalea septuagenata   | Seed Human food Food                                 |
| Angostura | Bactris acanthocarpa   | Petiole Utensils & tools Hunting and fishing         |
| Angostura | Bactris acanthocarpa   | Petiole Utensils & tools Labour tools                |
| Angostura | Bactris acanthocarpa   | Seed Cultural Personal adornment                     |
| Angostura | Bactris bidentula      | Fruit Animal food Fish bait                          |
| Angostura | Bactris bidentula      | Fruit Human food Food                                |
| Angostura | Bactris corossilla     | Fruit Human food Food                                |
| Angostura | Bactris corossilla     | Seed Human food Beverages                            |
| Angostura | Bactris corossilla     | Seed Human food Food                                 |
| Angostura | Bactris killipii       | Seed Cultural Personal adornment                     |
| Angostura | Desmoncus mitis        | Stem Utensils & tools Domestic utensils              |
| Angostura | Desmoncus mitis        | Stem Utensils & tools Rope                           |
| Angostura | Desmoncus polyacanthos | Stem Utensils & tools Domestic utensils              |
| Angostura | Desmoncus polyacanthos | Stem Utensils & tools Other                          |
| Angostura | Desmoncus polyacanthos | Stem Utensils & tools Rope                           |
| Angostura | Euterpe catinga        | Entire leaf Construction Thatch                      |
| Angostura | Euterpe catinga        | Fruit Human food Beverages                           |
| Angostura | Euterpe catinga        | Fruit Human food Food                                |
| Angostura | Euterpe catinga        | Palm heart Human food Food                           |
| Angostura | Euterpe catinga        | Stem Construction Houses                             |
| Angostura | Euterpe precatorea     | Entire leaf Construction Houses                      |
| Angostura | Euterpe precatorea     | Entire leaf Construction Thatch                      |
| Angostura | Euterpe precatorea     | Fruit Cultural Ritual                                |
| Angostura | Euterpe precatorea     | Fruit Human food Beverages                           |
| Angostura | Euterpe precatorea     | Fruit Human food Food                                |
| Angostura | Euterpe precatorea     | Fruit Medicinal & veterinary Sensory system          |
| Angostura | Euterpe precatorea     | Palm heart Human food Food                           |
| Angostura | Euterpe precatorea     | Root Cultural Cosmetic                               |
| Angostura | Euterpe precatorea     | Root Medicinal & veterinary Digestive system         |
| Angostura | Euterpe precatorea     | Root Medicinal & veterinary Musculo-skeletal system  |
| Angostura | Euterpe precatorea     | Root Medicinal & veterinary Not specified at all     |
| Angostura | Euterpe precatorea     | Root Medicinal & veterinary Respiratory system       |
| Angostura | Euterpe precatorea     | Stem Construction Houses                             |
| Angostura | Geonoma deversa        | Entire leaf Construction Thatch                      |
| Angostura | Geonoma maxima         | Entire leaf Construction Thatch                      |
| Angostura | Hyospathe elegans      | Entire leaf Construction Thatch                      |
| Angostura | Hyospathe elegans      | Entire leaf Utensils & tools Domestic utensils       |
| Angostura | Iriarteia deltoidea    | Entire leaf Construction Thatch                      |
| Angostura | Iriarteia deltoidea    | Root Cultural Ritual                                 |
| Angostura | Iriarteia deltoidea    | Root Utensils & tools Domestic utensils              |
| Angostura | Iriarteia deltoidea    | Seed Cultural Personal adornment                     |
| Angostura | Iriarteia deltoidea    | Stem Construction Houses                             |
| Angostura | Iriarteia deltoidea    | Stem Construction Other                              |
| Angostura | Iriarteia deltoidea    | Stem Construction Transportation                     |
| Angostura | Iriarteia deltoidea    | Stem Utensils & tools Labour tools                   |
| Angostura | Iriartella setigera    | Entire leaf Construction Thatch                      |
| Angostura | Iriartella setigera    | Entire leaf Utensils & tools Domestic utensils       |
| Angostura | Iriartella setigera    | Fruit Human food Beverages                           |
| Angostura | Iriartella setigera    | Stem Construction Houses                             |
| Angostura | Iriartella setigera    | Stem Construction Thatch                             |
| Angostura | Iriartella setigera    | Stem Cultural Ritual                                 |
| Angostura | Iriartella setigera    | Stem Utensils & tools Hunting and fishing            |
| Angostura | Lepidocaryum tenue     | Entire leaf Construction Houses                      |
| Angostura | Lepidocaryum tenue     | Entire leaf Construction Thatch                      |
| Angostura | Lepidocaryum tenue     | Palm heart Medicinal & veterinary Respiratory system |
| Angostura | Lepidocaryum tenue     | Petiole Utensils & tools Hunting and fishing         |
| Angostura | Lepidocaryum tenue     | Spear leaf Utensils & tools Domestic utensils        |
| Angostura | Lepidocaryum tenue     | Spear leaf Utensils & tools Hunting and fishing      |
| Angostura | Manicaria martiana     | Entire leaf Construction Thatch                      |
| Angostura | Manicaria saccifera    | Entire leaf Construction Thatch                      |
| Angostura | Mauritia carana        | Entire leaf Construction Thatch                      |
| Angostura | Mauritia carana        | Fruit Human food Beverages                           |
| Angostura | Mauritia carana        | Fruit Human food Food                                |
| Angostura | Mauritia carana        | Leaf sheath Utensils & tools Domestic utensils       |
| Angostura | Mauritia carana        | Spear leaf Utensils & tools Hunting and fishing      |
| Angostura | Mauritia carana        | Stem Other Miscellaneous                             |
| Angostura | Mauritia flexuosa      | Entire leaf Construction Thatch                      |
| Angostura | Mauritia flexuosa      | Entire leaf Utensils & tools Domestic utensils       |
| Angostura | Mauritia flexuosa      | Fruit Animal food Fish bait                          |
| Angostura | Mauritia flexuosa      | Fruit Cultural Ritual                                |
| Angostura | Mauritia flexuosa      | Fruit Human food Beverages                           |
| Angostura | Mauritia flexuosa      | Fruit Human food Food                                |
| Angostura | Mauritia flexuosa      | Fruit Human food Oils                                |

|           |                         |                                                                        |
|-----------|-------------------------|------------------------------------------------------------------------|
| Angostura | Mauritia flexuosa       | Seed Utensils & tools Other                                            |
| Angostura | Mauritia flexuosa       | Spear leaf Utensils & tools Domestic utensils                          |
| Angostura | Mauritia flexuosa       | Stem Other Miscellaneous                                               |
| Angostura | Mauritiella armata      | Entire leaf Construction Thatch                                        |
| Angostura | Mauritiella armata      | Fruit Animal food Fish bait                                            |
| Angostura | Mauritiella armata      | Fruit Human food Beverages                                             |
| Angostura | Mauritiella armata      | Fruit Human food Food                                                  |
| Angostura | Mauritiella armata      | Root Medicinal & veterinary Cultural diseases and disorders            |
| Angostura | Mauritiella armata      | Stem Construction Houses                                               |
| Angostura | Mauritiella armata      | Stem Other Miscellaneous                                               |
| Angostura | Mauritiella armata      | Stem Utensils & tools Labour tools                                     |
| Angostura | Oenocarpus bacaba       | Entire leaf Construction Thatch                                        |
| Angostura | Oenocarpus bacaba       | Fruit Human food Beverages                                             |
| Angostura | Oenocarpus bacaba       | Fruit Human food Food                                                  |
| Angostura | Oenocarpus bacaba       | Fruit Human food Oils                                                  |
| Angostura | Oenocarpus bacaba       | Stem Other Miscellaneous                                               |
| Angostura | Oenocarpus balickii     | Entire leaf Construction Thatch                                        |
| Angostura | Oenocarpus balickii     | Fruit Human food Beverages                                             |
| Angostura | Oenocarpus balickii     | Fruit Human food Food                                                  |
| Angostura | Oenocarpus balickii     | Stem Other Miscellaneous                                               |
| Angostura | Oenocarpus bataua       | Bract Cultural Recreational                                            |
| Angostura | Oenocarpus bataua       | Entire leaf Construction Thatch                                        |
| Angostura | Oenocarpus bataua       | Entire leaf Utensils & tools Domestic utensils                         |
| Angostura | Oenocarpus bataua       | Fruit Cultural Ritual                                                  |
| Angostura | Oenocarpus bataua       | Fruit Human food Beverages                                             |
| Angostura | Oenocarpus bataua       | Fruit Human food Food                                                  |
| Angostura | Oenocarpus bataua       | Fruit Human food Oils                                                  |
| Angostura | Oenocarpus bataua       | Leaf sheath Utensils & tools Hunting and fishing                       |
| Angostura | Oenocarpus bataua       | Palm heart Human food Food                                             |
| Angostura | Oenocarpus bataua       | Stem Other Miscellaneous                                               |
| Angostura | Oenocarpus circumtextus | Fruit Human food Beverages                                             |
| Angostura | Oenocarpus circumtextus | Fruit Human food Food                                                  |
| Angostura | Oenocarpus mapora       | Entire leaf Construction Thatch                                        |
| Angostura | Oenocarpus mapora       | Fruit Human food Beverages                                             |
| Angostura | Oenocarpus mapora       | Fruit Human food Food                                                  |
| Angostura | Oenocarpus mapora       | Petiole Utensils & tools Domestic utensils                             |
| Angostura | Oenocarpus mapora       | Stem Other Miscellaneous                                               |
| Angostura | Socratea exorrhiza      | Entire leaf Construction Thatch                                        |
| Angostura | Socratea exorrhiza      | Root Medicinal & veterinary Poisonings                                 |
| Angostura | Socratea exorrhiza      | Root Utensils & tools Domestic utensils                                |
| Angostura | Socratea exorrhiza      | Seed Cultural Personal adornment                                       |
| Angostura | Socratea exorrhiza      | Stem Construction Houses                                               |
| Angostura | Socratea exorrhiza      | Stem Construction Thatch                                               |
| Angostura | Socratea exorrhiza      | Stem Utensils & tools Hunting and fishing                              |
| Alto Ivon | Astrocaryum aculeatum   | Fruit Animal food Fodder                                               |
| Alto Ivon | Astrocaryum aculeatum   | Fruit Cultural Cosmetic                                                |
| Alto Ivon | Astrocaryum aculeatum   | Fruit Human food Food                                                  |
| Alto Ivon | Astrocaryum aculeatum   | Fruit Medicinal & veterinary General Ailments with Unspecific Symptoms |
| Alto Ivon | Astrocaryum aculeatum   | Fruit Medicinal & veterinary Respiratory system                        |
| Alto Ivon | Astrocaryum aculeatum   | Leaf rachis Utensils & tools Domestic utensils                         |
| Alto Ivon | Astrocaryum aculeatum   | Root Medicinal & veterinary Infections and infestations                |
| Alto Ivon | Astrocaryum aculeatum   | Seed Other Miscellaneous                                               |
| Alto Ivon | Astrocaryum aculeatum   | Spear leaf Utensils & tools Domestic utensils                          |
| Alto Ivon | Astrocaryum aculeatum   | Spear leaf Utensils & tools Hunting and fishing                        |
| Alto Ivon | Astrocaryum aculeatum   | Spines Cultural Personal adornment                                     |
| Alto Ivon | Astrocaryum aculeatum   | Spines Medicinal & veterinary Skin and subcutaneous tissue             |
| Alto Ivon | Astrocaryum aculeatum   | Stem Construction Houses                                               |
| Alto Ivon | Astrocaryum aculeatum   | Stem Other Miscellaneous                                               |
| Alto Ivon | Attalea maripa          | Bract Cultural Recreational                                            |
| Alto Ivon | Attalea maripa          | Bract Utensils & tools Domestic utensils                               |
| Alto Ivon | Attalea maripa          | Entire leaf Construction Thatch                                        |
| Alto Ivon | Attalea maripa          | Fruit Human food Beverages                                             |
| Alto Ivon | Attalea maripa          | Fruit Human food Food                                                  |
| Alto Ivon | Attalea maripa          | Petiole Utensils & tools Hunting and fishing                           |
| Alto Ivon | Attalea maripa          | Root Medicinal & veterinary Blood and Cardio-vascular system           |
| Alto Ivon | Attalea maripa          | Seed Cultural Cosmetic                                                 |
| Alto Ivon | Attalea maripa          | Seed Other Miscellaneous                                               |
| Alto Ivon | Attalea maripa          | Spear leaf Utensils & tools Domestic utensils                          |
| Alto Ivon | Attalea maripa          | Stem Other Miscellaneous                                               |
| Alto Ivon | Attalea princeps        | Bract Cultural Recreational                                            |
| Alto Ivon | Attalea princeps        | Bract Utensils & tools Domestic utensils                               |
| Alto Ivon | Attalea princeps        | Bract Utensils & tools Other                                           |
| Alto Ivon | Attalea princeps        | Entire leaf Construction Thatch                                        |
| Alto Ivon | Attalea princeps        | Fruit Human food Food                                                  |
| Alto Ivon | Attalea princeps        | Fruit Utensils & tools Other                                           |
| Alto Ivon | Attalea princeps        | Palm heart Human food Food                                             |
| Alto Ivon | Attalea princeps        | Root Medicinal & veterinary Infections and infestations                |
| Alto Ivon | Attalea princeps        | Seed Cultural Cosmetic                                                 |
| Alto Ivon | Attalea princeps        | Seed Human food Food                                                   |
| Alto Ivon | Attalea princeps        | Seed Medicinal & veterinary Respiratory system                         |
| Alto Ivon | Attalea princeps        | Seed Other Miscellaneous                                               |
| Alto Ivon | Attalea princeps        | Spear leaf Cultural Clothes and accessories                            |
| Alto Ivon | Attalea princeps        | Spear leaf Utensils & tools Domestic utensils                          |
| Alto Ivon | Attalea princeps        | Stem Other Miscellaneous                                               |
| Alto Ivon | Attalea princeps        | Stem Utensils & tools Domestic utensils                                |
| Alto Ivon | Attalea speciosa        | Entire leaf Construction Thatch                                        |
| Alto Ivon | Attalea speciosa        | Fruit Human food Food                                                  |

|           |                      |                                                                        |
|-----------|----------------------|------------------------------------------------------------------------|
| Alto Ivon | Attalea speciosa     | Root Medicinal & veterinary Infections and infestations                |
| Alto Ivon | Attalea speciosa     | Seed Cultural Cosmetic                                                 |
| Alto Ivon | Attalea speciosa     | Seed Other Miscellaneous                                               |
| Alto Ivon | Attalea speciosa     | Spear leaf Cultural Clothes and accessories                            |
| Alto Ivon | Attalea speciosa     | Spear leaf Utensils & tools Domestic utensils                          |
| Alto Ivon | Attalea speciosa     | Stem Other Miscellaneous                                               |
| Alto Ivon | Bactris acanthocarpa | Fruit Cultural Personal adornment                                      |
| Alto Ivon | Bactris acanthocarpa | Fruit Human food Food                                                  |
| Alto Ivon | Bactris acanthocarpa | Spear leaf Cultural Clothes and accessories                            |
| Alto Ivon | Bactris acanthocarpa | Spines Medicinal & veterinary Skin and subcutaneous tissue             |
| Alto Ivon | Bactris acanthocarpa | Stem Construction Houses                                               |
| Alto Ivon | Bactris major        | Fruit Human food Food                                                  |
| Alto Ivon | Bactris major        | Seed Cultural Other                                                    |
| Alto Ivon | Bactris major        | Seed Other Miscellaneous                                               |
| Alto Ivon | Bactris major        | Stem Cultural Recreational                                             |
| Alto Ivon | Bactris major        | Stem Utensils & tools Hunting and fishing                              |
| Alto Ivon | Bactris maraja       | Fruit Human food Food                                                  |
| Alto Ivon | Bactris maraja       | Seed Cultural Other                                                    |
| Alto Ivon | Cheilocarpus chuco   | Entire leaf Construction Thatch                                        |
| Alto Ivon | Cheilocarpus chuco   | Fruit Human food Food                                                  |
| Alto Ivon | Cheilocarpus chuco   | Leaf rachis Utensils & tools Domestic utensils                         |
| Alto Ivon | Cheilocarpus chuco   | Petiole Utensils & tools Domestic utensils                             |
| Alto Ivon | Cheilocarpus chuco   | Spear leaf Utensils & tools Domestic utensils                          |
| Alto Ivon | Cheilocarpus chuco   | Stem Construction Houses                                               |
| Alto Ivon | Cheilocarpus chuco   | Stem Utensils & tools Domestic utensils                                |
| Alto Ivon | Euterpe precatoria   | Entire leaf Construction Thatch                                        |
| Alto Ivon | Euterpe precatoria   | Fruit Human food Beverages                                             |
| Alto Ivon | Euterpe precatoria   | Fruit Human food Food                                                  |
| Alto Ivon | Euterpe precatoria   | Infrutescence Utensils & tools Domestic utensils                       |
| Alto Ivon | Euterpe precatoria   | Leaf rachis Utensils & tools Domestic utensils                         |
| Alto Ivon | Euterpe precatoria   | Palm heart Human food Food                                             |
| Alto Ivon | Euterpe precatoria   | Root Medicinal & veterinary Blood and Cardio-vascular system           |
| Alto Ivon | Euterpe precatoria   | Root Medicinal & veterinary Infections and infestations                |
| Alto Ivon | Euterpe precatoria   | Root Medicinal & veterinary Metabolic system and nutrition             |
| Alto Ivon | Euterpe precatoria   | Root Medicinal & veterinary Poisonings                                 |
| Alto Ivon | Euterpe precatoria   | Stem Construction Houses                                               |
| Alto Ivon | Euterpe precatoria   | Stem Medicinal & veterinary Poisonings                                 |
| Alto Ivon | Euterpe precatoria   | Stem Medicinal & veterinary Respiratory system                         |
| Alto Ivon | Euterpe precatoria   | Stem Other Miscellaneous                                               |
| Alto Ivon | Geonoma deversa      | Entire leaf Construction Thatch                                        |
| Alto Ivon | Geonoma deversa      | Spear leaf Utensils & tools Domestic utensils                          |
| Alto Ivon | Iriartea deltoidea   | Spear leaf Utensils & tools Domestic utensils                          |
| Alto Ivon | Iriartea deltoidea   | Stem Construction Houses                                               |
| Alto Ivon | Iriartea deltoidea   | Stem Utensils & tools Domestic utensils                                |
| Alto Ivon | Mauritia flexuosa    | Entire leaf Construction Thatch                                        |
| Alto Ivon | Mauritia flexuosa    | Fruit Human food Beverages                                             |
| Alto Ivon | Mauritia flexuosa    | Fruit Human food Food                                                  |
| Alto Ivon | Mauritia flexuosa    | Petiole Construction Houses                                            |
| Alto Ivon | Mauritia flexuosa    | Petiole Utensils & tools Domestic utensils                             |
| Alto Ivon | Mauritia flexuosa    | Spear leaf Utensils & tools Domestic utensils                          |
| Alto Ivon | Oenocarpus balickii  | Entire leaf Construction Thatch                                        |
| Alto Ivon | Oenocarpus balickii  | Fruit Cultural Cosmetic                                                |
| Alto Ivon | Oenocarpus balickii  | Fruit Human food Beverages                                             |
| Alto Ivon | Oenocarpus balickii  | Fruit Human food Food                                                  |
| Alto Ivon | Oenocarpus balickii  | Fruit Medicinal & veterinary General Ailments with Unspecific Symptoms |
| Alto Ivon | Oenocarpus balickii  | Fruit Medicinal & veterinary Respiratory system                        |
| Alto Ivon | Oenocarpus balickii  | Root Medicinal & veterinary Infections and infestations                |
| Alto Ivon | Oenocarpus balickii  | Seed Other Miscellaneous                                               |
| Alto Ivon | Oenocarpus balickii  | Spear leaf Cultural Clothes and accessories                            |
| Alto Ivon | Oenocarpus balickii  | Spear leaf Utensils & tools Domestic utensils                          |
| Alto Ivon | Oenocarpus balickii  | Stem Other Miscellaneous                                               |
| Alto Ivon | Oenocarpus bataua    | Entire leaf Construction Thatch                                        |
| Alto Ivon | Oenocarpus bataua    | Fruit Cultural Cosmetic                                                |
| Alto Ivon | Oenocarpus bataua    | Fruit Human food Beverages                                             |
| Alto Ivon | Oenocarpus bataua    | Fruit Human food Food                                                  |
| Alto Ivon | Oenocarpus bataua    | Fruit Medicinal & veterinary General Ailments with Unspecific Symptoms |
| Alto Ivon | Oenocarpus bataua    | Root Medicinal & veterinary Infections and infestations                |
| Alto Ivon | Oenocarpus bataua    | Seed Other Miscellaneous                                               |
| Alto Ivon | Oenocarpus bataua    | Spear leaf Cultural Clothes and accessories                            |
| Alto Ivon | Oenocarpus bataua    | Spear leaf Utensils & tools Domestic utensils                          |
| Alto Ivon | Oenocarpus bataua    | Stem Other Miscellaneous                                               |
| Alto Ivon | Oenocarpus mapora    | Entire leaf Construction Thatch                                        |
| Alto Ivon | Oenocarpus mapora    | Fruit Cultural Cosmetic                                                |
| Alto Ivon | Oenocarpus mapora    | Fruit Human food Beverages                                             |
| Alto Ivon | Oenocarpus mapora    | Fruit Human food Food                                                  |
| Alto Ivon | Oenocarpus mapora    | Fruit Medicinal & veterinary General Ailments with Unspecific Symptoms |
| Alto Ivon | Oenocarpus mapora    | Root Medicinal & veterinary Infections and infestations                |
| Alto Ivon | Oenocarpus mapora    | Seed Other Miscellaneous                                               |
| Alto Ivon | Oenocarpus mapora    | Spear leaf Cultural Clothes and accessories                            |
| Alto Ivon | Oenocarpus mapora    | Spear leaf Utensils & tools Domestic utensils                          |
| Alto Ivon | Oenocarpus mapora    | Stem Construction Houses                                               |
| Alto Ivon | Oenocarpus mapora    | Stem Other Miscellaneous                                               |
| Alto Ivon | Oenocarpus mapora    | Stem Utensils & tools Hunting and fishing                              |
| Alto Ivon | Socratea exorrhiza   | Palm heart Human food Food                                             |
| Alto Ivon | Socratea exorrhiza   | Root Utensils & tools Domestic utensils                                |
| Alto Ivon | Socratea exorrhiza   | Spear leaf Utensils & tools Domestic utensils                          |
| Alto Ivon | Socratea exorrhiza   | Spear leaf Utensils & tools Labour tools                               |



|           |                          |                                                                 |
|-----------|--------------------------|-----------------------------------------------------------------|
| Alto Ivon | Socratea exorrhiza       | Stem Construction Houses                                        |
| Alto Ivon | Socratea exorrhiza       | Stem Utensils & tools Domestic utensils                         |
| Alto Ivon | Syagrus sancona          | Seed Cultural Cosmetic                                          |
| Aguacate  | Asterogyne martiana      | Entire leaf Construction Thatch                                 |
| Aguacate  | Asterogyne martiana      | Entire leaf Utensils & tools Domestic utensils                  |
| Aguacate  | Asterogyne martiana      | Entire leaf Utensils & tools Wrappers                           |
| Aguacate  | Asterogyne martiana      | Fruit Animal food Fodder                                        |
| Aguacate  | Asterogyne martiana      | Fruit Human food Beverages                                      |
| Aguacate  | Asterogyne martiana      | Palm heart Human food Food                                      |
| Aguacate  | Asterogyne martiana      | Petiole Utensils & tools Domestic utensils                      |
| Aguacate  | Asterogyne martiana      | Seed Human food Food                                            |
| Aguacate  | Asterogyne martiana      | Spear leaf Utensils & tools Domestic utensils                   |
| Aguacate  | Asterogyne martiana      | Stem Fuel Firewood                                              |
| Aguacate  | Astrocaryum standleyanum | Entire leaf Fuel Lighting                                       |
| Aguacate  | Astrocaryum standleyanum | Fruit Animal food Fodder                                        |
| Aguacate  | Astrocaryum standleyanum | Fruit Animal food Wildlife attractant                           |
| Aguacate  | Astrocaryum standleyanum | Fruit Cultural Personal adornment                               |
| Aguacate  | Astrocaryum standleyanum | Fruit Cultural Recreational                                     |
| Aguacate  | Astrocaryum standleyanum | Fruit Human food Food                                           |
| Aguacate  | Astrocaryum standleyanum | Fruit Human food Food additives                                 |
| Aguacate  | Astrocaryum standleyanum | Palm heart Human food Food                                      |
| Aguacate  | Astrocaryum standleyanum | Seed Human food Beverages                                       |
| Aguacate  | Astrocaryum standleyanum | Seed Human food Food                                            |
| Aguacate  | Astrocaryum standleyanum | Spear leaf Cultural Clothes and accessories                     |
| Aguacate  | Astrocaryum standleyanum | Spear leaf Cultural Personal adornment                          |
| Aguacate  | Astrocaryum standleyanum | Spear leaf Cultural Ritual                                      |
| Aguacate  | Astrocaryum standleyanum | Spear leaf Utensils & tools Domestic utensils                   |
| Aguacate  | Astrocaryum standleyanum | Spines Medicinal & veterinary Skin and subcutaneous tissue      |
| Aguacate  | Astrocaryum standleyanum | Stem Construction Houses                                        |
| Aguacate  | Astrocaryum standleyanum | Stem Cultural Ritual                                            |
| Aguacate  | Astrocaryum standleyanum | Stem Fuel Firewood                                              |
| Aguacate  | Astrocaryum standleyanum | Stem Utensils & tools Hunting and fishing                       |
| Aguacate  | Astrocaryum standleyanum | Stem Utensils & tools Labour tools                              |
| Aguacate  | Attalea allenii          | Entire leaf Construction Thatch                                 |
| Aguacate  | Attalea allenii          | Entire leaf Cultural Ritual                                     |
| Aguacate  | Attalea allenii          | Fruit Cultural Personal adornment                               |
| Aguacate  | Attalea allenii          | Palm heart Human food Food                                      |
| Aguacate  | Attalea allenii          | Seed Human food Beverages                                       |
| Aguacate  | Attalea allenii          | Seed Human food Food                                            |
| Aguacate  | Attalea allenii          | Spear leaf Cultural Clothes and accessories                     |
| Aguacate  | Attalea allenii          | Spear leaf Cultural Recreational                                |
| Aguacate  | Attalea allenii          | Spear leaf Cultural Ritual                                      |
| Aguacate  | Attalea allenii          | Spear leaf Utensils & tools Domestic utensils                   |
| Aguacate  | Attalea cuatrecasana     | Fruit Cultural Personal adornment                               |
| Aguacate  | Attalea cuatrecasana     | Palm heart Human food Food                                      |
| Aguacate  | Attalea cuatrecasana     | Seed Human food Food                                            |
| Aguacate  | Attalea cuatrecasana     | Spear leaf Cultural Recreational                                |
| Aguacate  | Bactris barronis         | Fruit Human food Beverages                                      |
| Aguacate  | Bactris barronis         | Fruit Human food Food                                           |
| Aguacate  | Bactris barronis         | Palm heart Human food Food                                      |
| Aguacate  | Bactris barronis         | Seed Human food Food                                            |
| Aguacate  | Bactris barronis         | Spines Medicinal & veterinary Skin and subcutaneous tissue      |
| Aguacate  | Bactris barronis         | Stem Other Miscellaneous                                        |
| Aguacate  | Bactris barronis         | Stem Utensils & tools Hunting and fishing                       |
| Aguacate  | Bactris coloniata        | Fruit Human food Beverages                                      |
| Aguacate  | Bactris coloniata        | Fruit Human food Food                                           |
| Aguacate  | Bactris coloniata        | Fruit Human food Oils                                           |
| Aguacate  | Bactris coloniata        | Seed Human food Food                                            |
| Aguacate  | Bactris coloniata        | Spines Medicinal & veterinary Skin and subcutaneous tissue      |
| Aguacate  | Bactris coloniata        | Stem Utensils & tools Hunting and fishing                       |
| Aguacate  | Bactris coloradonis      | Fruit Human food Beverages                                      |
| Aguacate  | Bactris coloradonis      | Fruit Human food Food                                           |
| Aguacate  | Bactris coloradonis      | Fruit Medicinal & veterinary Reproductive system and sex health |
| Aguacate  | Bactris coloradonis      | Seed Human food Food                                            |
| Aguacate  | Bactris coloradonis      | Spines Medicinal & veterinary Skin and subcutaneous tissue      |
| Aguacate  | Bactris coloradonis      | Stem Utensils & tools Hunting and fishing                       |
| Aguacate  | Bactris maraja           | Petiole Utensils & tools Hunting and fishing                    |
| Aguacate  | Bactris maraja           | Seed Human food Food                                            |
| Aguacate  | Bactris maraja           | Spines Medicinal & veterinary Skin and subcutaneous tissue      |
| Aguacate  | Bactris maraja           | Stem Utensils & tools Hunting and fishing                       |
| Aguacate  | Desmoncus cirrhiferus    | Stem Construction Thatch                                        |
| Aguacate  | Desmoncus cirrhiferus    | Stem Cultural Clothes and accessories                           |
| Aguacate  | Desmoncus cirrhiferus    | Stem Utensils & tools Domestic utensils                         |
| Aguacate  | Desmoncus cirrhiferus    | Stem Utensils & tools Rope                                      |
| Aguacate  | Euterpe oleracea         | Entire leaf Construction Thatch                                 |
| Aguacate  | Euterpe oleracea         | Fruit Human food Beverages                                      |
| Aguacate  | Euterpe oleracea         | Fruit Human food Food                                           |
| Aguacate  | Euterpe oleracea         | Fruit Human food Oils                                           |
| Aguacate  | Euterpe oleracea         | Inflorescence Cultural Recreational                             |
| Aguacate  | Euterpe oleracea         | Palm heart Human food Food                                      |
| Aguacate  | Euterpe oleracea         | Spear leaf Cultural Ritual                                      |
| Aguacate  | Euterpe oleracea         | Stem Construction Houses                                        |
| Aguacate  | Euterpe oleracea         | Stem Environmental Fences                                       |
| Aguacate  | Euterpe oleracea         | Stem Utensils & tools Domestic utensils                         |
| Aguacate  | Euterpe precatória       | Entire leaf Construction Thatch                                 |
| Aguacate  | Euterpe precatória       | Fruit Human food Beverages                                      |
| Aguacate  | Euterpe precatória       | Fruit Human food Food                                           |

|          |                              |                                                                     |
|----------|------------------------------|---------------------------------------------------------------------|
| Aguacate | Euterpe precatoria           | Palm heart Human food Food                                          |
| Aguacate | Euterpe precatoria           | Spear leaf Cultural Ritual                                          |
| Aguacate | Euterpe precatoria           | Stem Construction Houses                                            |
| Aguacate | Euterpe precatoria           | Stem Environmental Fences                                           |
| Aguacate | Geonoma calyptrognoidea      | Entire leaf Construction Thatch                                     |
| Aguacate | Geonoma calyptrognoidea      | Seed Human food Food                                                |
| Aguacate | Geonoma cuneata              | Entire leaf Construction Thatch                                     |
| Aguacate | Geonoma cuneata              | Fruit Human food Food                                               |
| Aguacate | Geonoma cuneata              | Seed Human food Food                                                |
| Aguacate | Geonoma deversa              | Entire leaf Construction Thatch                                     |
| Aguacate | Geonoma deversa              | Stem Utensils & tools Hunting and fishing                           |
| Aguacate | Iriarteia deltoidea          | Entire leaf Construction Thatch                                     |
| Aguacate | Iriarteia deltoidea          | Leaf sheath Utensils & tools Other                                  |
| Aguacate | Iriarteia deltoidea          | Root Cultural Ritual                                                |
| Aguacate | Iriarteia deltoidea          | Root Utensils & tools Domestic utensils                             |
| Aguacate | Iriarteia deltoidea          | Seed Human food Food                                                |
| Aguacate | Iriarteia deltoidea          | Spear leaf Utensils & tools Domestic utensils                       |
| Aguacate | Iriarteia deltoidea          | Stem Construction Houses                                            |
| Aguacate | Iriarteia deltoidea          | Stem Construction Thatch                                            |
| Aguacate | Iriarteia deltoidea          | Stem Construction Transportation                                    |
| Aguacate | Iriarteia deltoidea          | Stem Cultural Recreational                                          |
| Aguacate | Iriarteia deltoidea          | Stem Cultural Ritual                                                |
| Aguacate | Iriarteia deltoidea          | Stem Medicinal & veterinary Skin and subcutaneous tissue            |
| Aguacate | Iriarteia deltoidea          | Stem Other Miscellaneous                                            |
| Aguacate | Iriarteia deltoidea          | Stem Utensils & tools Domestic utensils                             |
| Aguacate | Iriarteia deltoidea          | Stem Utensils & tools Hunting and fishing                           |
| Aguacate | Iriarteia deltoidea          | Stem Utensils & tools Labour tools                                  |
| Aguacate | Manicaria saccifera          | Bract Cultural Clothes and accessories                              |
| Aguacate | Manicaria saccifera          | Bract Utensils & tools Domestic utensils                            |
| Aguacate | Manicaria saccifera          | Bract Utensils & tools Labour tools                                 |
| Aguacate | Manicaria saccifera          | Bract Utensils & tools Other                                        |
| Aguacate | Manicaria saccifera          | Entire leaf Construction Thatch                                     |
| Aguacate | Manicaria saccifera          | Fruit Human food Food                                               |
| Aguacate | Manicaria saccifera          | Seed Human food Beverages                                           |
| Aguacate | Manicaria saccifera          | Seed Human food Food                                                |
| Aguacate | Manicaria saccifera          | Seed Medicinal & veterinary Not specified at all                    |
| Aguacate | Manicaria saccifera          | Stem Construction Houses                                            |
| Aguacate | Mauritiella macroclada       | Entire leaf Utensils & tools Domestic utensils                      |
| Aguacate | Mauritiella macroclada       | Stem Construction Houses                                            |
| Aguacate | Mauritiella macroclada       | Stem Environmental Fences                                           |
| Aguacate | Mauritiella macroclada       | Stem Utensils & tools Domestic utensils                             |
| Aguacate | Oenocarpus bataua            | Entire leaf Construction Thatch                                     |
| Aguacate | Oenocarpus bataua            | Entire leaf Cultural Ritual                                         |
| Aguacate | Oenocarpus bataua            | Entire leaf Utensils & tools Domestic utensils                      |
| Aguacate | Oenocarpus bataua            | Fruit Human food Beverages                                          |
| Aguacate | Oenocarpus bataua            | Fruit Human food Food                                               |
| Aguacate | Oenocarpus bataua            | Fruit Human food Oils                                               |
| Aguacate | Oenocarpus bataua            | Inflorescence Cultural Recreational                                 |
| Aguacate | Oenocarpus bataua            | Leaf sheath Cultural Recreational                                   |
| Aguacate | Oenocarpus bataua            | Palm heart Human food Food                                          |
| Aguacate | Oenocarpus bataua            | Seed Human food Food                                                |
| Aguacate | Oenocarpus bataua            | Spear leaf Utensils & tools Domestic utensils                       |
| Aguacate | Oenocarpus bataua            | Stem Construction Houses                                            |
| Aguacate | Oenocarpus bataua            | Stem Fuel Firewood                                                  |
| Aguacate | Oenocarpus bataua            | Stem Other Miscellaneous                                            |
| Aguacate | Oenocarpus mapora            | Entire leaf Construction Thatch                                     |
| Aguacate | Oenocarpus mapora            | Entire leaf Cultural Ritual                                         |
| Aguacate | Oenocarpus mapora            | Fruit Human food Beverages                                          |
| Aguacate | Oenocarpus mapora            | Fruit Human food Food                                               |
| Aguacate | Oenocarpus mapora            | Fruit Human food Oils                                               |
| Aguacate | Oenocarpus mapora            | Inflorescence Cultural Recreational                                 |
| Aguacate | Oenocarpus mapora            | Palm heart Human food Food                                          |
| Aguacate | Oenocarpus mapora            | Petiole Utensils & tools Domestic utensils                          |
| Aguacate | Oenocarpus mapora            | Spear leaf Cultural Ritual                                          |
| Aguacate | Oenocarpus mapora            | Stem Construction Houses                                            |
| Aguacate | Oenocarpus mapora            | Stem Fuel Firewood                                                  |
| Aguacate | Oenocarpus mapora            | Stem Other Miscellaneous                                            |
| Aguacate | Oenocarpus mapora            | Stem Utensils & tools Hunting and fishing                           |
| Aguacate | Pholidostachys dactyloides   | Entire leaf Medicinal & veterinary Blood and Cardio-vascular system |
| Aguacate | Pholidostachys dactyloides   | Stem Construction Houses                                            |
| Aguacate | Prestoea decurrens           | Inflorescence Cultural Recreational                                 |
| Aguacate | Prestoea decurrens           | Seed Cultural Personal adornment                                    |
| Aguacate | Prestoea decurrens           | Seed Human food Food                                                |
| Aguacate | Prestoea decurrens           | Stem Construction Houses                                            |
| Aguacate | Prestoea pubens              | Stem Utensils & tools Hunting and fishing                           |
| Aguacate | Socratea exorrhiza           | Fruit Human food Food                                               |
| Aguacate | Socratea exorrhiza           | Root Utensils & tools Domestic utensils                             |
| Aguacate | Socratea exorrhiza           | Seed Cultural Personal adornment                                    |
| Aguacate | Socratea exorrhiza           | Seed Cultural Recreational                                          |
| Aguacate | Socratea exorrhiza           | Seed Human food Food                                                |
| Aguacate | Socratea exorrhiza           | Stem Construction Houses                                            |
| Aguacate | Socratea exorrhiza           | Stem Utensils & tools Hunting and fishing                           |
| Aguacate | Socratea exorrhiza           | Stem Utensils & tools Rope                                          |
| Aguacate | Socratea hecatonandra        | Stem Construction Houses                                            |
| Aguacate | Synechanthus warscewiczianus | Entire leaf Construction Thatch                                     |
| Aguacate | Welfia regia                 | Entire leaf Construction Thatch                                     |
| Aguacate | Welfia regia                 | Entire leaf Utensils & tools Domestic utensils                      |

|               |                       |                                                                        |
|---------------|-----------------------|------------------------------------------------------------------------|
| Aguacate      | Welfia regia          | Fruit Animal food Wildlife attractant                                  |
| Aguacate      | Welfia regia          | Fruit Human food Food                                                  |
| Aguacate      | Welfia regia          | Seed Human food Beverages                                              |
| Aguacate      | Welfia regia          | Seed Human food Food                                                   |
| Aguacate      | Welfia regia          | Spear leaf Utensils & tools Domestic utensils                          |
| Aguacate      | Welfia regia          | Spear leaf Utensils & tools Rope                                       |
| Aguacate      | Welfia regia          | Stem Construction Houses                                               |
| Aguacate      | Welfia regia          | Stem Fuel Firewood                                                     |
| Aguacate      | Welfia regia          | Stem Utensils & tools Domestic utensils                                |
| Aguacate      | Welfia regia          | Stem Utensils & tools Hunting and fishing                              |
| Aguacate      | Wettinia aequalis     | Stem Construction Houses                                               |
| Aguacate      | Wettinia quinaria     | Entire leaf Construction Thatch                                        |
| Aguacate      | Wettinia quinaria     | Entire leaf Utensils & tools Hunting and fishing                       |
| Aguacate      | Wettinia quinaria     | Fruit Human food Food                                                  |
| Aguacate      | Wettinia quinaria     | Inflorescence Cultural Recreational                                    |
| Aguacate      | Wettinia quinaria     | Seed Cultural Personal adornment                                       |
| Aguacate      | Wettinia quinaria     | Seed Human food Food                                                   |
| Aguacate      | Wettinia quinaria     | Stem Construction Houses                                               |
| Aguacate      | Wettinia quinaria     | Stem Construction Thatch                                               |
| Aguacate      | Wettinia quinaria     | Stem Environmental Fences                                              |
| Aguacate      | Wettinia quinaria     | Stem Utensils & tools Domestic utensils                                |
| Aguacate      | Wettinia quinaria     | Stem Utensils & tools Hunting and fishing                              |
| 26 de Octubre | Astrocaryum aculeatum | Fruit Cultural Cosmetic                                                |
| 26 de Octubre | Astrocaryum aculeatum | Fruit Cultural Personal adornment                                      |
| 26 de Octubre | Astrocaryum aculeatum | Fruit Human food Food                                                  |
| 26 de Octubre | Astrocaryum aculeatum | Fruit Medicinal & veterinary General Ailments with Unspecific Symptoms |
| 26 de Octubre | Astrocaryum aculeatum | Fruit Medicinal & veterinary Skin and subcutaneous tissue              |
| 26 de Octubre | Astrocaryum aculeatum | Fruit Utensils & tools Hunting and fishing                             |
| 26 de Octubre | Astrocaryum aculeatum | Seed Other Miscellaneous                                               |
| 26 de Octubre | Astrocaryum aculeatum | Spear leaf Utensils & tools Domestic utensils                          |
| 26 de Octubre | Astrocaryum aculeatum | Stem Construction Houses                                               |
| 26 de Octubre | Attalea maripa        | Bract Utensils & tools Domestic utensils                               |
| 26 de Octubre | Attalea maripa        | Entire leaf Construction Thatch                                        |
| 26 de Octubre | Attalea maripa        | Fruit Cultural Personal adornment                                      |
| 26 de Octubre | Attalea maripa        | Fruit Human food Food                                                  |
| 26 de Octubre | Attalea maripa        | Fruit Medicinal & veterinary Respiratory system                        |
| 26 de Octubre | Attalea maripa        | Spear leaf Utensils & tools Domestic utensils                          |
| 26 de Octubre | Attalea princeps      | Bract Cultural Recreational                                            |
| 26 de Octubre | Attalea princeps      | Bract Human food Food additives                                        |
| 26 de Octubre | Attalea princeps      | Entire leaf Construction Thatch                                        |
| 26 de Octubre | Attalea princeps      | Fruit Human food Beverages                                             |
| 26 de Octubre | Attalea princeps      | Fruit Human food Food                                                  |
| 26 de Octubre | Attalea princeps      | Fruit Utensils & tools Other                                           |
| 26 de Octubre | Attalea princeps      | Infrutescence Utensils & tools Domestic utensils                       |
| 26 de Octubre | Attalea princeps      | Leaf rachis Utensils & tools Domestic utensils                         |
| 26 de Octubre | Attalea princeps      | Palm heart Human food Food                                             |
| 26 de Octubre | Attalea princeps      | Petiole Medicinal & veterinary Poisonings                              |
| 26 de Octubre | Attalea princeps      | Root Medicinal & veterinary Infections and infestations                |
| 26 de Octubre | Attalea princeps      | Seed Cultural Cosmetic                                                 |
| 26 de Octubre | Attalea princeps      | Seed Medicinal & veterinary General Ailments with Unspecific Symptoms  |
| 26 de Octubre | Attalea princeps      | Seed Medicinal & veterinary Skin and subcutaneous tissue               |
| 26 de Octubre | Attalea princeps      | Seed Other Miscellaneous                                               |
| 26 de Octubre | Attalea princeps      | Spear leaf Utensils & tools Domestic utensils                          |
| 26 de Octubre | Attalea princeps      | Spear leaf Utensils & tools Wrappers                                   |
| 26 de Octubre | Attalea speciosa      | Entire leaf Construction Thatch                                        |
| 26 de Octubre | Attalea speciosa      | Fruit Human food Food                                                  |
| 26 de Octubre | Attalea speciosa      | Seed Cultural Cosmetic                                                 |
| 26 de Octubre | Attalea speciosa      | Seed Medicinal & veterinary General Ailments with Unspecific Symptoms  |
| 26 de Octubre | Attalea speciosa      | Seed Medicinal & veterinary Musculo-skeletal system                    |
| 26 de Octubre | Attalea speciosa      | Spear leaf Utensils & tools Domestic utensils                          |
| 26 de Octubre | Bactris concinna      | Fruit Human food Food                                                  |
| 26 de Octubre | Bactris major         | Fruit Human food Food                                                  |
| 26 de Octubre | Bactris maraja        | Fruit Human food Food                                                  |
| 26 de Octubre | Cheyllocarpus chuco   | Entire leaf Construction Thatch                                        |
| 26 de Octubre | Cheyllocarpus chuco   | Spear leaf Utensils & tools Domestic utensils                          |
| 26 de Octubre | Euterpe precatoria    | Entire leaf Construction Thatch                                        |
| 26 de Octubre | Euterpe precatoria    | Fruit Human food Beverages                                             |
| 26 de Octubre | Euterpe precatoria    | Fruit Medicinal & veterinary Digestive system                          |
| 26 de Octubre | Euterpe precatoria    | Palm heart Human food Food                                             |
| 26 de Octubre | Euterpe precatoria    | Root Medicinal & veterinary Blood and Cardio-vascular system           |
| 26 de Octubre | Euterpe precatoria    | Spear leaf Cultural Clothes and accessories                            |
| 26 de Octubre | Euterpe precatoria    | Spear leaf Utensils & tools Domestic utensils                          |
| 26 de Octubre | Euterpe precatoria    | Stem Construction Houses                                               |
| 26 de Octubre | Geonoma deversa       | Entire leaf Construction Thatch                                        |
| 26 de Octubre | Iriarteia deltoidea   | Spear leaf Utensils & tools Domestic utensils                          |
| 26 de Octubre | Iriarteia deltoidea   | Stem Construction Houses                                               |
| 26 de Octubre | Iriarteia deltoidea   | Stem Construction Transportation                                       |
| 26 de Octubre | Mauritia flexuosa     | Entire leaf Construction Thatch                                        |
| 26 de Octubre | Mauritia flexuosa     | Entire plant Environmental Soil improvers                              |
| 26 de Octubre | Mauritia flexuosa     | Fruit Cultural Cosmetic                                                |
| 26 de Octubre | Mauritia flexuosa     | Fruit Human food Beverages                                             |
| 26 de Octubre | Mauritia flexuosa     | Fruit Human food Food                                                  |
| 26 de Octubre | Mauritia flexuosa     | Fruit Medicinal & veterinary Digestive system                          |
| 26 de Octubre | Mauritia flexuosa     | Petiole Construction Houses                                            |
| 26 de Octubre | Mauritia flexuosa     | Petiole Utensils & tools Domestic utensils                             |
| 26 de Octubre | Mauritia flexuosa     | Spear leaf Utensils & tools Domestic utensils                          |
| 26 de Octubre | Mauritia flexuosa     | Stem Other Miscellaneous                                               |

|               |                          |                                                                        |
|---------------|--------------------------|------------------------------------------------------------------------|
| 26 de Octubre | Oenocarpus bataua        | Entire leaf_Construction_Thatch                                        |
| 26 de Octubre | Oenocarpus bataua        | Fruit_Cultural_Cosmetic                                                |
| 26 de Octubre | Oenocarpus bataua        | Fruit_Human food_Beverages                                             |
| 26 de Octubre | Oenocarpus bataua        | Fruit_Human food_Food                                                  |
| 26 de Octubre | Oenocarpus bataua        | Fruit_Medicinal & veterinary_Digestive system                          |
| 26 de Octubre | Oenocarpus bataua        | Fruit_Medicinal & veterinary_General Ailments with Unspecific Symptoms |
| 26 de Octubre | Oenocarpus bataua        | Fruit_Medicinal & veterinary_Skin and subcutaneous tissue              |
| 26 de Octubre | Oenocarpus bataua        | Leaf rachis_Utensils & tools_Domestic utensils                         |
| 26 de Octubre | Oenocarpus bataua        | Spear leaf_Utensils & tools_Domestic utensils                          |
| 26 de Octubre | Oenocarpus bataua        | Stem_Construction_Houses                                               |
| 26 de Octubre | Oenocarpus bataua        | Stem_Other_Miscellaneous                                               |
| 26 de Octubre | Oenocarpus mapora        | Fruit_Cultural_Cosmetic                                                |
| 26 de Octubre | Oenocarpus mapora        | Fruit_Human food_Beverages                                             |
| 26 de Octubre | Oenocarpus mapora        | Stem_Construction_Houses                                               |
| 26 de Octubre | Oenocarpus mapora        | Stem_Other_Miscellaneous                                               |
| 26 de Octubre | Socratea exorrhiza       | Root_Medicinal & veterinary_Skin and subcutaneous tissue               |
| 26 de Octubre | Socratea exorrhiza       | Spear leaf_Utensils & tools_Labour tools                               |
| 26 de Octubre | Socratea exorrhiza       | Stem_Construction_Houses                                               |
| 25 de Mayo    | Attalea princeps         | Entire leaf_Construction_Thatch                                        |
| 25 de Mayo    | Attalea princeps         | Fruit_Human food_Beverages                                             |
| 25 de Mayo    | Attalea princeps         | Fruit_Human food_Food                                                  |
| 25 de Mayo    | Attalea princeps         | Palm heart_Human food_Food                                             |
| 25 de Mayo    | Attalea princeps         | Seed_Cultural_Cosmetic                                                 |
| 25 de Mayo    | Attalea princeps         | Seed_Other_Miscellaneous                                               |
| 25 de Mayo    | Attalea princeps         | Spear leaf_Utensils & tools_Domestic utensils                          |
| 25 de Mayo    | Chamaedorea angustisecta | Flower_Cultural_Cosmetic                                               |
| 25 de Mayo    | Chamaedorea angustisecta | Flower_Medicinal & veterinary_Respiratory system                       |
| 25 de Mayo    | Euterpe precatoria       | Entire leaf_Construction_Thatch                                        |
| 25 de Mayo    | Euterpe precatoria       | Fruit_Human food_Beverages                                             |
| 25 de Mayo    | Euterpe precatoria       | Palm heart_Human food_Food                                             |
| 25 de Mayo    | Euterpe precatoria       | Root_Medicinal & veterinary_Urinary system                             |
| 25 de Mayo    | Euterpe precatoria       | Spear leaf_Utensils & tools_Domestic utensils                          |
| 25 de Mayo    | Geonoma deversa          | Entire leaf_Construction_Thatch                                        |
| 25 de Mayo    | Iriarteia deltoidea      | Entire leaf_Construction_Thatch                                        |
| 25 de Mayo    | Iriarteia deltoidea      | Palm heart_Human food_Food                                             |
| 25 de Mayo    | Iriarteia deltoidea      | Stem_Construction_Houses                                               |
| 25 de Mayo    | Mauritia flexuosa        | Fruit_Human food_Food                                                  |
| 25 de Mayo    | Mauritia flexuosa        | Spear leaf_Cultural_Clothes and accessories                            |
| 25 de Mayo    | Oenocarpus bataua        | Entire leaf_Construction_Thatch                                        |
| 25 de Mayo    | Oenocarpus bataua        | Fruit_Human food_Beverages                                             |
| 25 de Mayo    | Oenocarpus bataua        | Fruit_Human food_Oils                                                  |
| 25 de Mayo    | Oenocarpus bataua        | Stem_Other_Miscellaneous                                               |
| 25 de Mayo    | Oenocarpus mapora        | Entire leaf_Construction_Thatch                                        |
| 25 de Mayo    | Oenocarpus mapora        | Fruit_Human food_Beverages                                             |
| 25 de Mayo    | Oenocarpus mapora        | Fruit_Human food_Oils                                                  |
| 25 de Mayo    | Phytelephas macrocarpa   | Entire leaf_Construction_Thatch                                        |
| 25 de Mayo    | Phytelephas macrocarpa   | Fruit_Human food_Beverages                                             |
| 25 de Mayo    | Phytelephas macrocarpa   | Seed_Cultural_Personal adornment                                       |
| 25 de Mayo    | Socratea exorrhiza       | Root_Medicinal & veterinary_Skin and subcutaneous tissue               |
| 25 de Mayo    | Socratea exorrhiza       | Seed_Cultural_Personal adornment                                       |
| 25 de Mayo    | Socratea exorrhiza       | Stem_Construction_Houses                                               |
| 25 de Mayo    | Socratea exorrhiza       | Stem_Utensils & tools_Domestic utensils                                |
